# Supplementary material for: Forced arm use is superior to voluntary training for motor recovery and brain plasticity after cortical ischemia in rats
Source: Exp Transl Stroke Med. 2014 Feb 14;6:3. doi: 10.1186/2040-7378-6-3 (PMC3937028; doi:10.1186/2040-7378-6-3)
Supplement: Additional file 5: Table S1 — Given are 3613 probe sets that were significantly influenced by the factor exercise (significance criteria: p < 0.01 after multiple testing adjustment for Benjamini-Hochberg false discovery rate). Numbers in the column titles signify different exercise paradigms in the 3 different locations: 1–3, cortex ipsilateral (1 = control, 2 = voluntary, 3 = forced training); 4–6, hippocampus (4 = control, 5 = voluntary, 6 = forced training); 7–9, cortex contralateral (7 = control, 8 = voluntary, 9 = forced training). “Mean” are the log2 transformed values, with “SEM” being the standard error of the mean for each group. “Mean norm” are the non-transformed intensity values for each group. “gene identifier”, “gene title” etc. give information for the identities of the probe set. [file 2040-7378-6-3-S5.xlsx]

## Sheet: Supplementary Table 1
mean 1	mean 2	mean 3	mean 4	mean 5	mean 6	mean 7	mean 8	mean 9	mean_norm 1	mean_norm 2	mean_norm 3	mean_norm 4	mean_norm 5	mean_norm 6	mean_norm 7	mean_norm 8	mean_norm 9	SEM 1	SEM 2	SEM 3	SEM 4	SEM 5	SEM 6	SEM 7	SEM 8	SEM 9	Gene Identifier	Other ID	Gene Title	UG Cluster	LocusLink	Gene ID
7.0195	9.60742	9.55415	7.13535	9.06449	9.28159	6.90458	8.89895	8.9393	129.742	780.048	751.771	140.59	535.406	622.353	119.808	477.365	490.905	0.520828	0.463932	0.58935	0.409101	0.565426	0.614368	0.48395	0.439915	0.704432	BE117929	1391416_at	Ankyrin repeat domain 17	Rn.8442	289521	Ankrd17
6.49244	8.37229	8.61806	5.93044	8.11428	8.45659	5.73791	7.73644	8.02641	90.0366	331.368	392.911	60.9874	277.103	351.307	53.3683	213.256	260.729	0.315999	0.56679	0.638486	0.333766	0.560041	0.952547	0.511838	0.574062	0.868275	BF403514	1385491_at	Transcribed locus, strongly similar to NP_001100951.1 PNMA-like 2 [Rattus norvegicus]	Rn.219510	-	-
5.27737	7.89042	8.26033	4.33646	5.41163	5.74767	5.55021	7.32421	7.54836	38.7835	237.276	306.625	20.2025	42.566	53.7305	46.8576	160.253	187.19	0.309968	0.520091	0.590061	0.067006	0.503363	0.738341	0.43139	0.528624	0.913899	AI576233	1391305_at	ESTs	-	-	-
5.82958	6.79396	8.52802	5.83464	6.70158	8.36349	5.58781	6.61205	8.32002	56.8694	110.965	369.139	57.0692	104.082	329.353	48.0948	97.8195	319.577	0.355186	0.475108	0.51337	0.457369	0.654562	0.535876	0.463232	0.722221	0.594551	AI556642	1391598_at	Transcribed locus	Rn.38860	-	-
4.19227	6.23672	6.72664	3.79287	5.40039	5.80292	4.15457	5.8091	6.23517	18.281	75.4119	105.906	13.8601	42.2357	55.8281	17.8094	56.0678	75.3309	0.211831	0.617106	0.691087	0.293075	0.551186	0.738554	0.419723	0.632608	0.821124	BF404554	1389874_at	Zinc finger (CCCH type), RNA binding motif and serine/arginine rich 1	Rn.204453	498425	Zrsr1
4.57604	6.86223	7.35675	3.76873	4.62506	5.29677	4.71403	6.26042	6.91799	23.852	116.342	163.909	13.6302	24.6764	39.3085	26.2461	76.661	120.927	0.316096	0.453966	0.568773	0.155913	0.469302	0.712589	0.37514	0.52011	0.92575	AT005664	1395714_at	ESTs	-	-	-
3.75844	5.72647	6.33704	3.6916	5.21199	5.84949	3.88094	5.11701	5.88481	13.5333	52.9467	80.8424	12.9206	37.0651	57.6596	14.7326	34.7035	59.0887	0.238071	0.413796	0.493211	0.215595	0.458305	0.693438	0.415643	0.529136	0.668814	BF419602	1379664_at	Zinc finger CCCH type containing 13	Rn.100827	305955	Zc3h13
4.69116	6.64653	7.47627	4.41797	5.33157	6.24922	4.90862	5.9574	7.27793	25.8333	100.186	178.066	21.3767	40.2682	76.0681	30.036	62.1378	155.194	0.261641	0.679283	0.742408	0.250342	0.597936	0.882691	0.328118	0.494396	0.759125	BF544149	1394330_at	EST, Highly similar to S21345 retrovirus-related leucine zipper protein p40 - rat retrotransposon (R.norvegicus)	-	-	-
5.14837	6.90093	7.40168	4.85482	6.51305	6.86176	5.15369	6.53504	6.74804	35.4661	119.505	169.094	28.9365	91.3321	116.304	35.5972	92.7349	107.489	0.296357	0.303069	0.462908	0.25971	0.355378	0.73087	0.328978	0.396922	0.590072	BF397805	1389989_at	Alpha thalassemia/mental retardation syndrome X-linked (RAD54 homolog, S. cerevisiae)	Rn.107838	246284	Atrx
4.40373	5.82501	6.21729	4.16494	5.5187	6.40592	4.05076	5.48935	6.14979	21.1668	56.6895	74.4031	17.9379	45.8452	84.7957	16.573	44.922	71.0021	0.226939	0.295935	0.682895	0.359347	0.35185	0.81562	0.263245	0.412459	0.822372	BE120450	1394987_at	Transcribed locus	Rn.203361	-	-
9.34727	11.0675	10.9209	8.99789	10.6374	10.7415	8.91923	10.5422	10.5495	651.341	2146.1	1938.74	511.252	1592.86	1712.04	484.123	1491.14	1498.7	0.322383	0.420745	0.513225	0.378183	0.489106	0.518562	0.440619	0.461766	0.625392	AI237389	1375335_at	Heat shock protein 90kDa alpha (cytosolic), class B member 1	Rn.98667	301252	Hsp90ab1
6.32338	7.80699	8.05059	5.80897	7.42181	7.77126	6.28149	7.64893	7.52918	80.0806	223.943	265.136	56.0627	171.47	218.465	77.7888	200.705	184.718	0.302909	0.297157	0.497927	0.236642	0.45706	0.377568	0.324361	0.293575	0.550045	AI578566	1381878_at	Ubinuclein 1	Rn.49741	302935	Ubn1
4.70002	5.91476	6.45074	4.29483	5.73549	6.15433	4.45223	5.80131	6.1439	25.9924	60.3282	87.4714	19.6278	53.2788	71.2259	21.8905	55.7658	70.7128	0.257144	0.339038	0.504782	0.205706	0.415996	0.503205	0.266816	0.401167	0.613107	AI059437	1377914_at	Serine/arginine repetitive matrix 1	Rn.39266	313620	Srrm1
7.5287	9.13375	8.97306	6.50078	8.03543	8.33019	7.27828	8.81864	8.65542	184.656	561.737	502.528	90.5586	262.365	321.838	155.232	451.518	403.219	0.414855	0.497056	0.567291	0.233191	0.530807	0.632747	0.331096	0.472166	0.856249	BF522755	1384133_at	Kinesin family member 1A	Rn.199509	363288	Kif1a
6.0639	7.81028	7.92511	6.02926	7.13818	7.79884	6.05562	7.18187	7.6286	66.8984	224.455	243.05	65.3113	140.866	222.682	66.5156	145.197	197.896	0.321533	0.422321	0.558428	0.287457	0.5772	0.60446	0.314645	0.365252	0.612104	BE100543	1384293_at	Nuclear receptor co-repressor 1	Rn.24948	54299	Ncor1
3.69202	5.04673	5.70718	3.46367	4.91315	5.59964	3.65135	4.2618	4.94578	12.9244	33.0535	52.2435	11.0324	30.1304	48.4908	12.5651	19.1836	30.8197	0.352847	0.401374	0.506662	0.190406	0.457786	0.667803	0.257159	0.380267	0.656208	BF419505	1374283_at	Transcribed locus, strongly similar to NP_004450.3 bromodomain PHD finger transcription factor isoform 2 [Homo sapiens]	Rn.201943	-	-
6.18365	7.66805	7.75443	5.55411	7.15174	7.33041	5.95487	7.15443	7.50276	72.6882	203.382	215.932	46.9844	142.196	160.943	62.029	142.462	181.366	0.230682	0.340383	0.502965	0.203246	0.427131	0.610669	0.459499	0.388001	0.620591	BF546803	1394362_at	Similar to intracellular protein transport like (XM453)	Rn.38655	308053	RGD1307525
6.58604	8.23031	8.32235	6.33128	7.58306	7.9087	6.31857	7.62634	7.92253	96.0717	300.31	320.094	80.5203	191.747	240.301	79.814	197.586	242.616	0.313546	0.336058	0.564835	0.273298	0.404032	0.451398	0.400098	0.431914	0.563762	AI575906	1397373_at	MAP7 domain containing 2	Rn.92968	317508	Map7d2
7.18404	8.43937	8.78872	6.35094	7.90075	8.35323	6.97063	8.09198	8.43345	145.416	347.139	442.251	81.625	238.981	327.019	125.421	272.853	345.718	0.350301	0.35693	0.527813	0.376454	0.391259	0.409843	0.30567	0.325378	0.610287	BE116698	1382489_at	Similar to WD repeat domain 11 protein	Rn.23174	315843	RGD1564964
5.35385	6.80935	7.47804	5.00037	5.7552	6.65048	5.43524	5.91473	7.29571	40.8949	112.155	178.285	32.0082	54.0117	100.46	43.2683	60.3269	157.119	0.412524	0.628831	0.751418	0.10646	0.428807	0.813248	0.190429	0.431724	0.726199	BE108371	1393739_at	EST, Weakly similar to S21345 retrovirus-related leucine zipper protein p40 - rat retrotransposon (R.norvegicus)	-	-	-
5.55992	6.88082	7.59728	5.53161	6.33305	7.22836	5.42661	6.46979	7.13301	47.174	117.851	193.646	46.2573	80.6191	149.952	43.0103	88.6341	140.362	0.22854	0.364975	0.571564	0.242872	0.471562	0.675795	0.347376	0.448984	0.789162	AI145240	1384857_at	A kinase (PRKA) anchor protein (yotiao) 9	Rn.202416	246150	Akap9
4.3215	5.72693	5.98724	4.35641	5.509	6.04056	4.35326	5.65946	5.92265	19.9941	52.9636	63.4364	20.4838	45.538	65.8248	20.4391	50.5437	60.659	0.207461	0.283672	0.37986	0.253352	0.29773	0.573996	0.316092	0.331071	0.564827	BE115521	1391170_at	SET domain containing 5	Rn.49964	297514	Setd5
5.22637	6.57111	7.15123	5.35774	6.14209	6.91512	4.92918	6.15958	6.65426	37.4364	95.0826	142.146	41.0053	70.6242	120.686	30.4671	71.4856	100.724	0.231211	0.354792	0.463886	0.139018	0.334672	0.647553	0.203211	0.365956	0.662249	BF393029	1385006_at	Alpha thalassemia/mental retardation syndrome X-linked (RAD54 homolog, S. cerevisiae)	Rn.107838	246284	Atrx
5.73524	7.44356	7.97567	6.07109	6.83143	7.25321	5.93596	6.92488	7.35327	53.2696	174.074	251.719	67.2326	113.885	152.558	61.2212	121.506	163.514	0.285184	0.425575	0.518509	0.234981	0.413624	0.686098	0.344025	0.289668	0.728393	BF398451	1393798_at	Alpha thalassemia/mental retardation syndrome X-linked (RAD54 homolog, S. cerevisiae)	Rn.107838	246284	Atrx
4.49734	5.86529	6.47712	4.34667	5.53902	6.16681	4.66453	5.33052	6.04145	22.5857	58.2946	89.0856	20.346	46.4955	71.8447	25.3608	40.2389	65.8655	0.201894	0.332567	0.468297	0.214599	0.424891	0.710051	0.409948	0.426953	0.674001	BE102268	1385074_at	SWI/SNF related, matrix associated, actin dependent regulator of chromatin, subfamily a, member 2	Rn.94939	361745	Smarca2
6.75105	7.99035	8.59394	6.64597	7.85733	8.37381	6.87213	7.88792	8.3488	107.713	254.293	386.397	100.147	231.895	331.717	117.143	236.865	326.016	0.241894	0.298541	0.446084	0.215072	0.386296	0.526906	0.378466	0.23295	0.612329	AI059119	1383827_at	Tousled-like kinase 1	Rn.6114	311118	Tlk1
6.54254	8.00138	8.23863	6.42279	7.57341	7.90361	6.42897	7.67628	7.98765	93.2182	256.245	302.047	85.7931	190.469	239.455	86.1614	204.546	253.818	0.276259	0.349402	0.417282	0.208411	0.32867	0.394654	0.351626	0.301996	0.503658	AW252511	1376739_at	DEAD (Asp-Glu-Ala-Asp) box polypeptide 24	Rn.100166	373065	Ddx24
4.36948	5.68799	5.97245	4.429	5.73866	6.24501	4.2028	5.22085	5.59924	20.6702	51.5532	62.7894	21.5408	53.396	75.8465	18.4149	37.2934	48.4774	0.27857	0.331332	0.538018	0.316391	0.431184	0.65858	0.508528	0.425711	0.754837	BF418135	1382775_at	Ryanodine receptor 2, cardiac	Rn.208315	689560	Ryr2
6.07485	7.63831	7.34565	6.58404	7.69887	7.62932	5.49462	7.16027	7.24134	67.4081	199.233	162.653	95.9386	207.774	197.995	45.0864	143.04	151.308	0.461059	0.207206	0.484274	0.382873	0.311407	0.477064	0.524652	0.320565	0.513812	BE104102	1374276_at	Transcribed locus	Rn.204421	-	-
7.74472	9.07305	9.4349	7.40913	8.41579	9.16037	7.56112	8.55502	9.13452	214.483	538.592	692.13	169.969	341.511	572.198	188.853	376.112	562.036	0.394312	0.318147	0.521483	0.347427	0.403799	0.498417	0.347511	0.313695	0.570333	AW527313	1383825_at	Radixin	Rn.203261	315655	Rdx
9.21875	10.5324	10.8388	8.4436	9.66079	10.1763	9.06576	10.1295	10.5334	595.827	1481.05	1831.49	348.158	809.445	1157.1	535.878	1120.17	1482.07	0.359727	0.305621	0.539319	0.337212	0.429964	0.385035	0.348603	0.401689	0.518403	BE113419	1375459_at	SFRS protein kinase 2	Rn.138055	296753	Srpk2
4.46513	5.87011	6.26285	4.87156	5.75848	6.46899	4.61908	5.64457	6.21665	22.0871	58.4897	76.7902	29.2742	54.1346	88.585	24.5743	50.0247	74.3701	0.210363	0.284087	0.38167	0.177484	0.349151	0.538838	0.204248	0.296929	0.510144	BE109271	1379200_at	Similar to Ubiquitin ligase protein DZIP3 (DAZ-interacting protein 3 homolog)	Rn.162050	303963	RGD1563278
4.75835	5.91991	6.19366	4.21338	5.39183	5.66454	4.19302	5.64431	5.91485	27.0649	60.5439	73.1943	18.5504	41.9858	50.722	18.2905	50.0157	60.3319	0.298619	0.345919	0.369825	0.17904	0.371584	0.395677	0.315509	0.37672	0.489124	BM392052	1375453_at	Hypothetical protein LOC685233	Rn.20927	685233	LOC685233
9.35917	10.9502	11.4983	8.94839	10.0476	10.3373	9.90543	10.7343	10.903	656.736	1978.51	2892.9	494.008	1058.35	1293.71	959.029	1703.52	1914.83	0.393959	0.283729	0.444079	0.300994	0.38831	0.445516	0.37692	0.225612	0.629488	BE104278	1380172_at	Kinesin family member 5C	Rn.50843	311024	Kif5c
3.88935	4.93673	5.85405	3.89669	4.84345	5.41919	3.88264	4.87226	5.50827	14.8187	30.627	57.8422	14.8943	28.7094	42.7897	14.75	29.2885	45.515	0.239737	0.453948	0.436638	0.25027	0.357302	0.503062	0.283781	0.425743	0.595974	AI411326	1381030_at	SLU7 splicing factor homolog (S. cerevisiae)	Rn.137183	303057	Slu7
5.42846	6.95635	7.34458	5.42452	6.42384	6.86045	5.63181	6.44015	7.03162	43.0655	124.185	162.532	42.948	85.8556	116.199	49.5842	86.8317	130.836	0.332397	0.244306	0.308925	0.213233	0.363346	0.470889	0.31845	0.335107	0.493935	BG373449	1392207_at	LUC7-like (S. cerevisiae)	Rn.99992	360503	Luc7l
6.1571	7.33932	7.9262	4.33173	5.20226	5.65902	5.93274	7.05714	7.7181	71.3628	161.94	243.234	20.1363	36.816	50.5283	61.0847	133.171	210.562	0.530246	0.203858	0.505903	0.385494	0.30539	0.465507	0.258159	0.400836	0.518103	AI137224	1390923_a_at	Oxysterol binding protein-like 1A	Rn.178664	259221	Osbpl1a
5.53219	6.70107	7.48264	5.59596	6.35856	7.06764	5.48808	6.24567	7.16746	46.2759	104.045	178.854	48.3673	82.0573	134.144	44.8825	75.8812	143.754	0.226019	0.395733	0.509106	0.250698	0.365549	0.735887	0.327185	0.34594	0.739323	BF523248	1382620_at	Ankyrin repeat domain 11	Rn.23844	365023	Ankrd11
6.94911	8.29943	8.99687	6.89566	7.85409	8.32338	7.13926	7.76221	8.39672	123.564	315.048	510.89	119.069	231.375	320.322	140.972	217.099	337.027	0.225258	0.381514	0.478765	0.245851	0.449934	0.56107	0.339482	0.444477	0.635333	BF397936	1391578_at	Similar to modulator of estrogen induced transcription	Rn.49121	315792	RGD1307526
4.19502	5.41249	5.92304	4.02809	5.0645	5.5952	4.12163	4.94625	5.55786	18.3158	42.5914	60.6754	16.3146	33.4631	48.3418	17.4074	30.8297	47.1067	0.250743	0.333887	0.507937	0.173544	0.400609	0.559556	0.270685	0.358139	0.553669	BF397677	1378509_at	Kinesin family member 3a	Rn.47400	84392	Kif3a
5.99642	7.46041	7.15069	5.93855	7.3536	7.10254	5.58361	7.128	6.76128	63.8414	176.119	142.093	61.3312	163.551	137.429	47.955	139.876	108.48	0.499828	0.33753	0.512403	0.282148	0.438927	0.469904	0.347989	0.418128	0.480398	BE111847	1375469_at	SWI/SNF related, matrix associated, actin dependent regulator of chromatin, subfamily a, member 4	Rn.23417	171379	Smarca4
5.05783	6.39252	7.23998	5.74377	6.50419	6.79572	5.47788	6.48608	6.59053	33.3088	84.0118	151.165	53.5855	90.7729	111.1	44.5663	89.6406	96.3712	0.351573	0.364901	0.459211	0.28348	0.427533	0.572632	0.336845	0.338001	0.701021	BI298889	1376299_at	Jumonji, AT rich interactive domain 1A (Rbp2 like)	Rn.134218	312678	Jarid1a
4.90644	5.82526	6.20867	5.19133	6.4731	6.87802	4.37792	5.42995	5.90213	29.9906	56.6993	73.9598	36.5381	88.8377	117.622	20.7915	43.11	59.8023	0.264279	0.317416	0.377262	0.353738	0.466135	0.615802	0.244717	0.419047	0.563732	NM_020088	1368993_at	Odz, odd Oz/ten-m homolog 2 (Drosophila)	Rn.205610	117242	Odz2
6.66887	8.16035	8.09698	6.01794	7.334	7.3767	6.48435	7.70694	7.52496	101.749	286.095	273.8	64.8008	161.344	166.191	89.5331	208.939	184.178	0.3343	0.280938	0.505907	0.258759	0.460633	0.426889	0.338786	0.408289	0.526406	BF398063	1382206_a_at	A kinase (PRKA) anchor protein 2	Rn.162811	298024	Akap2
6.35258	7.50412	7.70371	6.06061	7.29444	7.36239	5.77247	7.06248	7.3106	81.7179	181.537	208.472	66.746	156.98	164.551	54.6621	133.665	158.749	0.33143	0.260796	0.488823	0.295436	0.379959	0.360069	0.322524	0.30683	0.478316	BG372976	1375552_at	Transcribed locus, strongly similar to NP_079967.1 signal recognition particle 72 [Mus musculus]	Rn.154894	-	-
4.73002	6.62657	6.23189	4.58201	5.57568	5.5473	5.13826	6.55382	5.95682	26.5386	98.809	75.1598	23.9509	47.6922	46.7631	35.2185	93.9499	62.1129	0.300829	0.410125	0.546658	0.229136	0.437152	0.559919	0.263824	0.273424	0.558591	BF416262	1395054_at	Ubiquitin specific peptidase 29	Rn.162413	361495	Usp29
7.92243	9.23497	9.53926	7.94154	9.0246	9.30418	7.79528	8.81371	9.19142	242.599	602.564	744.052	245.834	520.805	632.175	222.133	449.978	584.646	0.250062	0.337894	0.391475	0.238533	0.404669	0.516515	0.401625	0.335754	0.58283	BE117773	1395237_at	Eukaryotic translation initiation factor 5B	Rn.203410	308306	Eif5b
4.029	5.13739	5.42487	3.86311	5.2753	5.28869	3.62519	4.89374	4.83053	16.3249	35.1972	42.9584	14.5516	38.7279	39.089	12.3393	29.7278	28.4534	0.236775	0.257902	0.397815	0.281864	0.416786	0.532974	0.215636	0.494529	0.518704	AF001423	1368985_at	glutamate receptor, ionotropic, N-methyl D-aspartate 2A	-	24409	-
7.70887	8.83493	9.17245	7.27815	8.67012	8.8674	7.60797	8.46858	8.88831	209.219	456.645	577.009	155.218	407.349	467.039	195.086	354.239	473.858	0.280212	0.333195	0.689818	0.335299	0.372882	0.506892	0.325267	0.313609	0.633195	AI059295	1383615_a_at	HECT domain containing 1	Rn.36797	362736	Hectd1
6.0741	7.36957	7.52132	5.78045	6.97057	7.13538	5.85306	6.89141	7.27134	67.3731	165.372	183.714	54.9653	125.415	140.593	57.8025	118.719	154.487	0.261151	0.231301	0.290192	0.235244	0.255515	0.353109	0.193114	0.36007	0.383283	BF396651	1385422_at	Myeloid/lymphoid or mixed-lineage leukemia 5 (trithorax homolog, Drosophila)	Rn.106040	311968	Mll5
6.82232	8.01737	8.27608	7.77379	8.61278	9.14303	6.52915	7.75703	8.10332	113.168	259.101	309.99	218.849	391.476	565.362	92.357	216.321	275.006	0.474626	0.213914	0.666407	0.355236	0.362024	0.481113	0.229957	0.308162	0.5852	AI170377	1376933_at	Transcribed locus	Rn.23214	-	-
6.73417	7.68697	8.23304	6.70995	7.73352	8.18586	6.48407	7.62915	8.00298	106.46	206.067	300.879	104.688	212.824	291.199	89.5158	197.972	256.529	0.254545	0.342295	0.424962	0.248009	0.401609	0.372445	0.310877	0.260866	0.571134	BE108131	1376256_at	WD repeat and FYVE domain containing 1	Rn.8557	301549	Wdfy1
4.42947	5.83962	6.01413	4.11828	4.74325	5.23138	4.31572	5.59504	5.83378	21.5478	57.2665	64.6299	17.367	26.7831	37.5666	19.9141	48.3365	57.0352	0.241082	0.267739	0.503339	0.282196	0.348669	0.503426	0.381441	0.320956	0.559907	AI059603	1393615_at	Transcribed locus	Rn.19226	-	-
4.02041	5.28808	5.84271	3.79842	4.6981	5.00822	3.86178	4.4435	5.45913	16.228	39.0725	57.3893	13.9136	25.9579	32.1828	14.5382	21.7584	43.9908	0.257245	0.472422	0.482681	0.1383	0.471034	0.668236	0.300018	0.452935	0.766592	BF416508	1389441_at	Annexin V-binding protein ABP-10	Rn.202713	207118	Abp10
4.35163	5.01533	5.87926	4.01405	4.91192	5.62985	3.93833	4.99476	5.59494	20.416	32.3418	58.8618	16.1566	30.1048	49.5169	15.3305	31.884	48.3331	0.335777	0.317084	0.619083	0.303917	0.43381	0.716199	0.373224	0.31354	0.774864	BE118639	1382939_at	Translocated promoter region	Rn.58980	304862	Tpr
4.54735	5.57379	6.31507	4.68975	5.39636	6.0365	4.44241	5.4406	5.99612	23.3824	47.6297	79.6206	25.8081	42.1179	65.6398	21.742	43.4294	63.8281	0.39703	0.2468	0.340769	0.268229	0.240824	0.352554	0.234906	0.33441	0.389735	BG666758	1386096_at	Metal response element binding transcription factor 2	Rn.20300	360905	Mtf2
6.24787	7.21184	7.83988	5.58065	6.3889	7.09828	6.03544	7.14797	7.45567	75.997	148.245	229.107	47.8567	83.8013	137.024	65.5916	141.825	175.542	0.257542	0.354941	0.502019	0.17288	0.416783	0.570379	0.348494	0.285645	0.686286	BF560163	1394436_at	Sperm associated antigen 9	Rn.24583	360600	Spag9
3.61828	4.75083	5.2279	3.81031	4.72007	4.90893	3.33399	4.42071	4.91869	12.2804	26.9242	37.4761	14.0287	26.3562	30.0424	10.084	21.4174	30.2464	0.286177	0.352686	0.445943	0.310904	0.399428	0.548143	0.279263	0.442551	0.620603	BI282883	1391689_at	Jumonji, AT rich interactive domain 1A (Rbp2 like)	Rn.134218	312678	Jarid1a
6.58967	7.39036	7.308	4.03032	5.5839	5.49875	5.64816	7.03008	7.06344	96.3138	167.772	158.463	16.3398	47.9647	45.2156	50.1494	130.697	133.754	0.303329	0.258183	0.432546	0.224731	0.369545	0.341813	0.459348	0.30675	0.460464	BE113875	1392299_at	Nitric oxide synthase 1 (neuronal) adaptor protein	Rn.9903	192363	Nos1ap
7.66715	8.98633	8.70861	7.12402	8.58086	8.55726	7.3609	8.60115	8.32711	203.255	507.172	418.363	139.49	382.91	376.697	164.381	388.333	321.151	0.251612	0.204956	0.368067	0.252758	0.289218	0.237268	0.313492	0.216992	0.348834	AW434782	1377532_at	Similar to Hepatocellular carcinoma-associated antigen 58 homolog	Rn.38255	311575	RGD1305020
4.50347	6.18734	6.03721	4.53459	5.35981	5.90597	4.80416	5.374	5.84907	22.6819	72.8744	65.6722	23.1765	41.0642	59.9617	27.9381	41.4701	57.6429	0.238758	0.327142	0.551589	0.331686	0.211616	0.52685	0.278183	0.298181	0.534042	AW532939	1392736_at	ESTs	-	-	-
5.84458	7.60472	7.42279	5.47614	6.33288	6.37542	6.37003	7.42695	7.27846	57.4637	194.647	171.586	44.5125	80.6096	83.0219	82.7123	172.082	155.251	0.171948	0.232727	0.359491	0.193146	0.326345	0.41027	0.23187	0.143012	0.658216	BF405604	1381736_at	Transcribed locus	Rn.107723	-	-
4.69799	5.61131	6.03716	4.52659	5.30769	5.84632	4.13316	5.1476	5.87937	25.9559	48.8847	65.6699	23.0483	39.6072	57.5331	17.5471	35.4472	58.8663	0.350781	0.260724	0.363428	0.249155	0.280188	0.433588	0.276246	0.279611	0.501467	BF397274	1382904_at	Coiled-coil domain containing 55	Rn.145937	303346	Ccdc55
5.95737	7.21822	7.52169	6.22657	7.1637	7.56008	5.87525	6.70838	7.1313	62.1365	148.902	183.761	74.8832	143.38	188.717	58.6984	104.574	140.196	0.247704	0.442748	0.385551	0.256002	0.381346	0.273841	0.22177	0.373155	0.373927	AI112113	1378269_at	Dynein, axonemal, light chain 1	Rn.156856	685664	Dnal1
5.6725	6.72332	6.95404	5.74087	6.82161	7.08232	5.53869	6.62702	6.91499	51.0026	105.663	123.987	53.4779	113.112	135.516	46.4849	98.8398	120.676	0.274094	0.247343	0.487382	0.333293	0.334138	0.396208	0.209206	0.287158	0.476346	BM383427	1370957_at	Interleukin 6 signal transducer	Rn.12138	25205	Il6st
4.8292	5.83599	6.46682	4.67262	5.6505	5.85176	4.88963	5.75389	6.28434	28.4272	57.1226	88.4518	25.5034	50.2308	57.7504	29.6432	53.9627	77.9426	0.085508	0.227275	0.297826	0.071556	0.385694	0.404125	0.226201	0.368873	0.553769	BM392106	1368824_at	Caldesmon 1	Rn.204926	25687	Cald1
5.66002	6.776	7.26018	5.41958	6.3844	6.7685	5.67664	6.41866	6.92376	50.5633	109.592	153.296	42.8012	83.5403	109.024	51.1492	85.5479	121.411	0.225936	0.299252	0.41306	0.165932	0.380686	0.43326	0.283238	0.27029	0.513029	BE098532	1398588_at	SLU7 splicing factor homolog (S. cerevisiae)	Rn.137183	303057	Slu7
6.18012	7.22529	7.63924	6.1515	7.17174	7.46859	6.07775	7.00112	7.37714	72.5106	149.634	199.361	71.0863	144.181	177.121	67.5437	128.099	166.242	0.231336	0.304966	0.425073	0.261673	0.417018	0.484113	0.30787	0.276015	0.505924	AW434972	1392936_at	Similar to RNA binding motif protein 25	Rn.220196	497865	RGD1565486
7.25558	8.39086	8.65614	7.41464	8.42368	8.89663	7.31248	8.11584	8.50695	152.808	335.661	403.42	170.62	343.384	476.598	158.956	277.403	363.787	0.301642	0.246181	0.394575	0.33442	0.285242	0.351732	0.221553	0.217353	0.374183	AA963991	1382068_at	Transcribed locus	Rn.24964	-	-
4.16018	5.06777	5.77293	4.0414	5.08028	5.20659	4.10488	4.95871	5.4648	17.8788	33.5391	54.6796	16.4658	33.8311	36.9266	17.2065	31.0971	44.164	0.328189	0.268674	0.530127	0.202229	0.376439	0.519008	0.290137	0.405585	0.640723	BF402692	1375622_at	Zinc finger, FYVE domain containing 20	Rn.172475	312562	Zfyve20
5.73293	7.10602	7.36245	6.10015	6.90386	7.59337	5.87967	6.10072	7.0062	53.1844	137.761	164.558	68.6006	119.748	193.122	58.8785	68.6277	128.551	0.363922	0.297895	0.480985	0.263631	0.393278	0.375375	0.3119	0.515916	0.465324	AW141642	1392902_at	ESF1, nucleolar pre-rRNA processing protein, homolog (S. cerevisiae)	Rn.22208	366203	Esf1
5.3105	6.39006	6.94879	5.68349	6.43031	7.15268	5.76319	6.38453	6.98687	39.6844	83.8687	123.536	51.3926	86.2415	142.289	54.3117	83.5478	126.84	0.307138	0.25098	0.451297	0.19229	0.362979	0.46835	0.286803	0.234862	0.519592	AI044545	1394706_at	Transcribed locus	Rn.220617	-	-
6.90351	7.95469	8.24759	6.53835	7.45329	7.94267	6.56043	7.41757	7.92503	119.719	248.085	303.929	92.9479	175.252	246.027	94.3814	170.967	243.037	0.200523	0.31007	0.51222	0.203413	0.413097	0.558651	0.264563	0.299756	0.551546	BE116128	1395616_at	M-phase phosphoprotein 8	Rn.42579	290270	Mphosph8
9.10998	10.1713	10.0189	8.41454	9.61315	9.70121	8.60161	9.80234	9.92599	552.557	1153.1	1037.5	341.216	783.153	832.444	388.457	892.891	972.794	0.223901	0.255484	0.483463	0.322757	0.304479	0.357153	0.263079	0.322134	0.48922	NM_021767	1369404_a_at	Neurexin 1	Rn.54924	60391	Nrxn1
4.74636	5.51055	5.75265	4.26179	5.46273	5.79678	4.03418	4.94571	5.47145	26.8409	45.587	53.9163	19.1834	44.1007	55.591	16.3836	30.8182	44.3681	0.365127	0.238681	0.372358	0.302966	0.379377	0.54908	0.324083	0.430629	0.616002	BI288589	1385408_at	MAX gene associated	Rn.78917	499874	Mga
7.17496	8.38274	8.59054	6.29148	7.26967	7.53479	7.10918	7.99645	8.32258	144.503	333.777	385.487	78.3293	154.308	185.438	138.063	255.371	320.145	0.362536	0.216799	0.479048	0.287321	0.297942	0.49052	0.296963	0.31104	0.472829	NM_022178	1368450_at	Myosin Va	Rn.44865	25017	Myo5a
6.52762	7.34015	7.41149	7.23307	8.43706	8.59739	5.75737	7.03385	7.12174	92.2591	162.034	170.248	150.443	346.584	387.322	54.093	131.039	139.27	0.300426	0.200097	0.548849	0.438863	0.415475	0.482018	0.324824	0.250785	0.508985	AW529244	1378904_at	Transcribed locus, strongly similar to NP_766449.1 solute carrier family 7, member 14 [Mus musculus]	Rn.44848	-	-
7.00111	7.81627	7.9623	6.48301	7.68423	7.88146	6.46866	7.54739	7.90081	128.099	225.388	249.397	89.45	205.676	235.807	88.5647	187.064	238.991	0.33253	0.204093	0.515168	0.309532	0.343465	0.361745	0.262487	0.243157	0.555279	NM_031081	1370052_at	3-phosphoinositide dependent protein kinase-1	Rn.10905	81745	Pdpk1
5.54381	6.61859	6.83864	5.6388	6.93558	7.01864	5.49	6.19204	6.59278	46.6502	98.2639	114.455	49.8251	122.41	129.665	44.9422	73.1122	96.5216	0.262499	0.35724	0.447107	0.370545	0.480683	0.549169	0.260008	0.340516	0.461448	AW530903	1382312_at	AT rich interactive domain 5B (Mrf1 like)	Rn.204911	309728	Arid5b
4.11492	4.494	5.51466	3.27573	3.99043	4.5559	3.59551	4.27901	5.51141	17.3266	22.5335	45.717	9.68485	15.8942	23.5214	12.0881	19.4138	45.6142	0.322754	0.345296	0.657316	0.29812	0.416197	0.448552	0.4117	0.299197	0.519286	NM_031347	1370089_at	Peroxisome proliferator-activated receptor gamma, coactivator 1 alpha	Rn.19172	83516	Ppargc1a
4.42335	5.26579	5.29928	4.0669	5.46113	5.59446	4.0207	5.05998	5.13681	21.4566	38.4734	39.377	16.7594	44.0518	48.317	16.2312	33.3584	35.1831	0.338594	0.232721	0.400461	0.337001	0.42628	0.409567	0.16332	0.244656	0.51604	BG372400	1375698_at	Transcribed locus	Rn.23254	-	-
6.45303	7.56487	8.04728	6.50496	7.38848	7.5881	6.45943	7.19848	7.80651	87.6104	189.345	264.529	90.8214	167.554	192.418	87.9999	146.879	223.869	0.380211	0.209924	0.448658	0.232304	0.298939	0.348912	0.159055	0.274922	0.371312	BE114021	1379101_at	DEAH (Asp-Glu-Ala-His) box polypeptide 36	Rn.2744	310461	Dhx36
8.60265	9.68573	9.67316	8.29074	9.42408	9.65221	8.327	9.29539	9.60098	388.737	823.56	816.416	313.156	686.959	804.646	321.127	628.335	776.574	0.349042	0.181135	0.447865	0.260399	0.325332	0.289804	0.321236	0.299052	0.422693	AI045904	1374002_at	Hypothetical protein LOC100192313	Rn.98813	100192313	LOC100192313
7.67664	8.95527	9.35227	7.72352	8.59179	9.01809	7.9849	8.69717	8.82208	204.597	496.369	653.603	211.354	385.822	518.46	253.335	415.058	452.596	0.340001	0.296897	0.475909	0.189641	0.323836	0.424771	0.336685	0.207413	0.473192	BF392456	1390706_at	Spectrin, beta, non-erythrocytic 1	Rn.93208	305614	Sptbn1
7.32736	8.42705	8.39294	7.08822	8.18797	8.3398	6.97525	8.036	8.27837	160.604	344.187	336.145	136.071	291.625	323.989	125.823	262.468	310.483	0.375148	0.243174	0.356235	0.261693	0.338211	0.402405	0.324825	0.316606	0.420052	AW141706	1377667_at	Rtf1, Paf1/RNA polymerase II complex component, homolog (S. cerevisiae)	Rn.22569	366169	Rtf1
4.65172	5.6562	5.84583	4.75165	5.83407	5.87021	4.20169	5.54646	5.3205	25.1366	50.4296	57.5136	26.9395	57.0466	58.4937	18.4007	46.7359	39.9604	0.367002	0.290688	0.552304	0.451076	0.328303	0.404778	0.238555	0.277346	0.383199	BG378086	1371003_at	Microtubule-associated protein 1B	Rn.98152	29456	Map1b
4.44981	5.47983	6.05006	4.43464	5.1495	5.63373	4.59921	5.07875	6.12025	21.8538	44.6265	66.2597	21.6252	35.4939	49.6503	24.2382	33.7953	69.5631	0.141017	0.354222	0.382751	0.073982	0.327395	0.538098	0.143482	0.239125	0.629311	AW526140	1380001_at	Pinin, desmosome associated protein	Rn.38987	368070	Pnn
3.68882	4.30954	4.9971	4.11209	4.82638	5.96844	3.33138	3.79817	4.69943	12.8957	19.829	31.9357	17.2927	28.3717	62.6152	10.0657	13.9112	25.9818	0.346872	0.30933	0.68104	0.531862	0.417683	0.695062	0.281047	0.300183	0.494746	BF398085	1394961_at	Transcribed locus	Rn.148641	-	-
7.00939	8.03861	8.37257	8.14815	9.03986	9.29719	6.86472	7.66974	8.29313	128.836	262.944	331.432	283.686	526.343	629.119	116.543	203.621	313.676	0.2219	0.092896	0.323954	0.231238	0.125059	0.482564	0.329677	0.217262	0.332713	BI288541	1391985_at	Nuclear receptor interacting protein 3	Rn.48099	361625	Nrip3
9.05692	10.2024	10.2923	8.64894	9.68941	9.78531	8.8345	9.83009	10.0381	532.604	1178.23	1253.98	401.412	825.663	882.413	456.509	910.232	1051.4	0.269395	0.207645	0.275969	0.182899	0.288213	0.271762	0.219664	0.219952	0.352006	BF547275	1384125_at	Myeloid/lymphoid or mixed-lineage leukemia 5 (trithorax homolog, Drosophila)	Rn.106040	311968	Mll5
3.69523	4.17769	4.75411	4.82516	5.75309	6.71579	3.66394	4.37891	4.89187	12.9531	18.0971	26.9855	28.3477	53.9328	105.112	12.6752	20.8057	29.6893	0.198387	0.213036	0.272564	0.412854	0.444502	0.577151	0.102535	0.18694	0.434348	BF406606	1385087_at	Transcribed locus	Rn.173397	-	-
9.12087	9.89878	10.0797	8.53844	9.75649	9.85587	8.63023	9.52945	10.0301	556.744	954.618	1082.16	371.815	864.96	926.643	396.24	739.01	1045.59	0.287983	0.271657	0.547676	0.344805	0.36853	0.432357	0.403198	0.237496	0.496356	BF408990	1390048_at	Serine/arginine repetitive matrix 2	Rn.162027	302969	Srrm2
5.74539	6.596	6.76437	5.93592	6.79765	7.34554	5.44142	6.41472	6.85945	53.6457	96.7373	108.712	61.2195	111.249	162.64	43.4541	85.3146	116.118	0.275757	0.276128	0.498427	0.316988	0.318167	0.459664	0.289352	0.289435	0.476782	BE109251	1377904_at	Transcribed locus	Rn.204861	-	-
5.40318	6.47923	6.89715	5.35526	6.29719	6.45096	5.38654	5.96161	6.688	42.3174	89.216	119.193	40.9349	78.6399	87.4848	41.8321	62.3194	103.107	0.212814	0.260251	0.450494	0.103251	0.379423	0.556402	0.178455	0.280083	0.538206	BE096160	1380475_at	Transcribed locus, strongly similar to NP_001103682.1 GRB10 interacting GYF protein 2 isoform b [Mus musculus]	Rn.160186	-	-
6.50354	7.22732	7.60977	6.82481	8.07124	8.13003	6.21031	7.13912	7.41849	90.732	149.844	195.33	113.363	268.959	280.145	74.044	140.958	171.076	0.266311	0.244195	0.470193	0.288677	0.444035	0.366567	0.311563	0.251444	0.523481	Y07783	1370950_at	Phosphatidic acid phosphatase type 2B	Rn.12038	192270	Ppap2b
5.09929	6.11951	6.30471	4.93974	5.79578	6.06025	4.78807	5.72268	6.13776	34.2799	69.5274	79.0509	30.6909	55.5525	66.7294	27.6282	52.8078	70.4125	0.179606	0.253944	0.362794	0.217365	0.402183	0.39843	0.247235	0.311142	0.468029	AI029751	1384804_at	DNA (cytosine-5-)-methyltransferase 3 alpha	Rn.92659	444984	Dnmt3a
4.30154	5.22473	5.61655	4.03089	4.76512	5.38602	4.1091	4.79006	5.39826	19.7193	37.3939	49.0625	16.3463	27.1922	41.8171	17.2569	27.6663	42.1734	0.190727	0.286929	0.383803	0.20309	0.300455	0.573364	0.206226	0.203997	0.537149	BF389640	1379485_at	Eukaryotic translation initiation factor 3, subunit 10 (theta)	Rn.1644	292148	Eif3s10
7.32083	8.11711	8.76353	5.93792	6.64259	7.28625	7.34372	8.04475	8.57673	159.878	277.647	434.596	61.3045	99.9123	156.092	162.435	264.065	381.815	0.231867	0.20773	0.348403	0.253746	0.250055	0.275559	0.214073	0.171148	0.313704	AW526127	1395819_at	Transcribed locus	Rn.146532	-	-
6.09414	6.65689	7.37998	5.77205	6.43441	6.91302	5.68538	6.6454	7.22797	68.3155	100.908	166.569	54.6462	86.4869	120.511	51.46	100.107	149.912	0.29244	0.262245	0.514171	0.335543	0.16097	0.391609	0.222815	0.248611	0.330338	NM_017269	1368589_at	Protein tyrosine phosphatase, receptor type, J	Rn.10278	29645	Ptprj
6.14151	7.71998	7.53424	6.77467	7.62477	7.71252	6.63511	7.25075	7.34205	70.5958	210.836	185.367	109.491	197.372	209.749	99.3956	152.298	162.247	0.327787	0.321009	0.305124	0.141742	0.303671	0.293383	0.188527	0.179112	0.436138	AW520944	1379300_at	Carbohydrate sulfotransferase 2	Rn.95986	367145	Chst2
6.03121	7.12852	7.83692	6.42956	7.21212	7.25121	6.41258	7.22362	7.08429	65.3996	139.926	228.638	86.1967	148.274	152.346	85.1881	149.46	135.701	0.358988	0.2925	0.474266	0.27383	0.331976	0.407894	0.234171	0.213784	0.573461	AA819847	1379571_at	Plakophilin 4	Rn.17389	295625	Pkp4
4.90803	5.96768	5.91636	4.71178	5.38255	5.34915	4.43679	5.44799	6.11997	30.0237	62.5822	60.3951	26.2052	41.7166	40.7619	21.6574	43.6524	69.5496	0.193587	0.253168	0.315767	0.173964	0.107091	0.266558	0.214122	0.375926	0.360811	BF406306	1393565_at	Similar to RIKEN cDNA A030009H04	Rn.148168	497935	RGD1563441
4.60058	5.71361	6.01705	4.0469	4.54737	5.20205	4.68281	5.30073	5.978	24.2612	52.4769	64.7608	16.5287	23.3827	36.8106	25.6842	39.4166	63.0315	0.219535	0.383383	0.346789	0.184356	0.320077	0.459575	0.160552	0.164406	0.571787	AI412781	1391152_at	similar to RIKEN cDNA 4930555G01 /// similar to Discs large homolog 5 (Placenta and prostate DLG) (Discs large protein P-dlg) /// similar to Discs large homolog 5 (Placenta and prostate DLG) (Discs large protein P-dlg) /// similar to Discs large homo	-	-	-
8.1934	9.07884	10.0915	8.54056	8.73915	9.28202	8.89028	9.49051	10.2396	292.725	540.758	1091.05	372.361	427.313	622.539	474.505	719.33	1209	0.326554	0.477834	0.493	0.400205	0.197031	0.328681	0.310578	0.283505	0.57043	AI008409	1389986_at	CDNA clone IMAGE:7321089	Rn.119131	-	-
7.02406	8.08836	8.34276	7.69848	8.80055	8.85857	7.24825	7.84021	8.21414	130.153	272.169	324.654	207.718	445.892	464.189	152.034	229.16	296.963	0.37475	0.163456	0.340012	0.277117	0.205443	0.412535	0.196038	0.282046	0.384287	U31554	1370550_at	Limbic system-associated membrane protein	Rn.10176	29561	Lsamp
7.6496	8.52159	8.97222	7.97782	8.80414	9.13072	7.58892	8.391	8.8197	200.798	367.497	502.235	252.094	447.003	560.558	192.527	335.693	451.85	0.514686	0.151123	0.482576	0.368104	0.303381	0.549017	0.375176	0.200672	0.399774	BF416432	1371007_at	EphA5	Rn.24569	79208	Epha5
6.53788	7.59385	7.87863	6.24313	6.92495	7.12591	6.48893	7.44201	7.72449	92.9176	193.186	235.344	75.7477	121.512	139.673	89.8178	173.887	211.497	0.189962	0.223195	0.366615	0.108566	0.255512	0.36217	0.105395	0.243395	0.43718	BI290699	1374232_at	Phosphatidylinositol 3-kinase, catalytic, alpha polypeptide	Rn.44193	170911	Pik3ca
6.65761	7.45072	7.79207	6.22436	7.37523	7.27229	6.27365	7.44154	7.15087	100.958	174.94	221.639	74.7686	166.022	154.589	77.3672	173.831	142.111	0.378405	0.301638	0.29907	0.165155	0.30115	0.400459	0.157606	0.256206	0.488275	BF413266	1396612_at	Transcribed locus, strongly similar to XP_001076082.1 PREDICTED: similar to ankyrin 2 isoform 1 [Rattus norvegicus]	Rn.207473	-	-
5.75035	6.35233	6.61677	5.22391	5.98503	6.48985	5.1511	6.09062	6.68549	53.8304	81.7037	98.14	37.3726	63.3393	89.8751	35.5333	68.149	102.928	0.317037	0.317928	0.399995	0.229431	0.451969	0.529553	0.202781	0.338456	0.630036	BE104755	1395053_at	PDS5, regulator of cohesion maintenance, homolog B (S. cerevisiae)	Rn.105768	304218	Pds5b
6.55443	7.38923	7.66364	6.66134	7.51536	8.07204	6.4699	7.20033	7.59764	93.9897	167.641	202.762	101.219	182.957	269.108	88.6409	147.067	193.695	0.465446	0.328234	0.434738	0.209142	0.352342	0.44481	0.257139	0.213054	0.566486	BE117119	1396803_at	THO complex 2	Rn.35526	313308	Thoc2
3.37845	4.4404	4.52705	3.36535	4.45339	4.41373	3.44098	4.35005	4.34706	10.3996	21.7117	23.0557	10.3056	21.9081	21.314	10.8602	20.3937	20.3515	0.242775	0.271143	0.429485	0.263964	0.375426	0.454162	0.27787	0.294298	0.514238	AI044245	1382712_at	Transcribed locus	Rn.204017	-	-
4.13475	5.25442	5.46666	3.80346	4.50599	4.82106	3.89499	4.43402	5.14865	17.5664	38.1714	44.221	13.9623	22.7216	28.2673	14.8768	21.6159	35.473	0.238418	0.133977	0.358096	0.126449	0.255767	0.286686	0.228319	0.195266	0.44197	AW536039	1381115_at	ESTs	-	-	-
6.29002	7.17095	7.57009	6.09743	6.98184	7.23474	6.19453	6.93965	7.27157	78.2501	144.102	190.031	68.4714	126.399	150.617	73.2385	122.756	154.511	0.367585	0.132639	0.587563	0.341015	0.277427	0.427272	0.245212	0.192766	0.472127	BM384277	1389840_at	Splicing factor 3b, subunit 1	Rn.198843	84486	Sf3b1
5.85796	6.84834	6.7506	6.04346	7.18467	7.11049	5.58273	6.642	6.48478	57.9992	115.227	107.68	65.9573	145.479	138.188	47.9258	99.8714	89.5598	0.332792	0.334268	0.40292	0.253593	0.4297	0.333411	0.253775	0.292682	0.529198	BF394331	1398065_at	Sine oculis-binding protein homolog-like (Drosophila)	Rn.208930	309860	Sobpl
4.85737	5.85141	5.76513	4.75546	5.93254	6.02515	4.72504	5.41901	5.66942	28.9877	57.7364	54.3847	27.0107	61.0763	65.1255	26.4471	42.7843	50.8939	0.190873	0.256202	0.293301	0.218375	0.301207	0.236932	0.166266	0.302423	0.29161	BI282272	1376146_at	Similar to RIKEN cDNA 2310033P09	Rn.21630	303180	RGD1304587
5.54201	6.41846	6.95535	6.25446	6.84884	7.17168	5.56695	6.40158	6.82589	46.592	85.536	124.099	76.3449	115.267	144.175	47.4044	84.541	113.448	0.147681	0.248251	0.331474	0.172673	0.250444	0.240497	0.220197	0.090474	0.335656	AI574994	1378372_at	Transcribed locus	Rn.203112	-	-
5.8643	6.55754	7.13845	5.98304	6.5787	6.8826	5.46854	6.2405	7.02703	58.2546	94.1925	140.892	63.252	95.5842	117.996	44.2787	75.6097	130.421	0.323283	0.190002	0.369648	0.343624	0.212048	0.423234	0.274297	0.347716	0.478228	AW527767	1379607_at	Transcribed locus	Rn.148105	-	-
8.12098	8.4733	8.64942	6.48025	7.80391	7.92874	7.31269	8.19281	8.47759	278.393	355.4	401.546	89.2791	223.466	243.662	158.979	292.605	356.458	0.21495	0.125286	0.480436	0.481422	0.155533	0.358361	0.300059	0.177929	0.18196	BG672437	1369627_at	CDNA clone IMAGE:7321089	Rn.119131	-	-
6.55375	7.31581	7.249	8.42919	9.56216	9.46738	6.14254	7.02509	7.5238	93.9454	159.323	152.113	344.698	755.957	707.889	70.6462	130.246	184.03	0.368176	0.143252	0.391278	0.362484	0.241531	0.364127	0.297762	0.215326	0.272989	AA685184	1370850_at	Sodium channel, voltage-gated, type III, beta	Rn.3402	245956	Scn3b
4.3982	5.24577	5.53765	4.13863	5.05866	5.10273	4.04207	4.863	5.29811	21.0858	37.9432	46.4514	17.6137	33.3279	34.3617	16.4734	29.1011	39.345	0.244959	0.231513	0.386792	0.234986	0.416663	0.477965	0.240004	0.385342	0.488318	AI502357	1383007_at	Bardet-Biedl syndrome 4 homolog (human)	Rn.25002	300754	Bbs4
5.63403	6.15076	6.88254	5.40687	6.20206	7.00815	5.58022	6.01558	6.60734	49.6606	71.0499	117.992	42.4258	73.6217	128.725	47.8425	64.6949	97.5007	0.301912	0.32777	0.454459	0.379477	0.444181	0.435113	0.252374	0.336815	0.574533	BF388585	1376917_at	Zinc finger protein 292	Rn.106753	50552	Znf292
9.04881	10.2385	9.45182	8.4816	9.91667	9.2096	8.81224	10.2856	9.10485	529.619	1208.08	700.295	357.451	966.53	592.06	449.52	1248.17	550.596	0.253754	0.144237	0.349885	0.209652	0.085664	0.230933	0.313075	0.136737	0.327471	BF418394	1373582_at	Transcribed locus	Rn.219309	-	-
5.63296	6.03907	6.66392	5.14966	5.84196	6.48048	4.96684	5.95252	6.26034	49.6238	65.7569	101.4	35.4979	57.3595	89.2933	31.2729	61.928	76.6567	0.325034	0.195385	0.378624	0.273278	0.316579	0.424695	0.218743	0.200537	0.410281	NM_013045	1369692_at	Tenascin R	Rn.11028	25567	Tnr
4.6408	5.02133	5.75346	4.45298	5.27723	5.81668	4.30751	4.75774	5.71002	24.9471	32.4766	53.9466	21.9018	38.7797	56.3631	19.8011	27.0534	52.3465	0.24881	0.078278	0.335646	0.385588	0.24678	0.567601	0.292152	0.290135	0.502179	AI601993	1394655_at	Transcribed locus	Rn.148063	-	-
6.35218	7.09584	7.54434	6.26045	7.10857	7.41202	6.20183	6.87001	7.36294	81.6952	136.792	186.669	76.6625	138.004	170.31	73.61	116.971	164.614	0.333668	0.22353	0.305924	0.211968	0.349491	0.311496	0.237081	0.24838	0.506004	BI291230	1379062_at	Hypothetical LOC100151767	Rn.159880	100151767	LOC100151767
5.03721	5.65681	6.23233	5.20353	5.80522	6.41287	4.82191	5.38227	6.23715	32.8361	50.451	75.1828	36.8484	55.9172	85.2052	28.2839	41.7085	75.4344	0.297887	0.259558	0.455315	0.403232	0.399758	0.548301	0.269086	0.276297	0.438149	BF397290	1393702_at	5'-3' exoribonuclease 2	Rn.64021	362229	Xrn2
5.63446	6.08145	6.54499	4.18006	5.11171	5.48311	5.31967	6.07109	6.63096	49.6754	67.7172	93.3767	18.1269	34.5763	44.7281	39.9374	67.2326	99.1101	0.168178	0.171733	0.447925	0.238445	0.269365	0.47437	0.335419	0.227235	0.447344	AF324454	1370833_at	Peroxisomal biogenesis factor 5-like	Rn.207886	286937	Pex5l
6.08744	6.72532	6.98528	5.70248	6.54873	7.14743	5.64436	6.30142	6.82401	67.9989	105.809	126.701	52.0736	93.619	141.772	50.0175	78.8708	113.3	0.336537	0.273064	0.393645	0.297213	0.399965	0.41451	0.310521	0.316837	0.50409	BF406594	1382307_at	Protein phosphatase 1, regulatory (inhibitor) subunit 12A	Rn.162937	116670	Ppp1r12a
6.42547	7.39068	7.51368	6.70083	7.50817	7.60308	6.34345	7.3575	7.38142	85.9526	167.809	182.744	104.028	182.047	194.426	81.2024	163.994	166.736	0.347366	0.223307	0.349598	0.247558	0.206704	0.558921	0.267544	0.28436	0.289598	BF391439	1395986_at	Slit homolog 2 (Drosophila)	Rn.146652	360272	Slit2
4.28366	4.95955	5.31412	3.80344	4.89901	5.07211	4.08082	4.62813	5.14399	19.4765	31.1153	39.7841	13.9621	29.8366	33.6401	16.9219	24.729	35.3586	0.247406	0.187013	0.439544	0.322941	0.27552	0.435037	0.274675	0.279519	0.402157	BI296423	1375486_at	Similar to nuclear RNA export factor 2	Rn.101740	680025	LOC680025
4.66065	5.78544	5.88923	4.40935	5.09486	5.33458	4.69907	5.42642	5.70319	25.2927	55.1558	59.27	21.2494	34.1748	40.3523	25.9753	43.0046	52.0992	0.141917	0.312354	0.387402	0.19042	0.445954	0.417825	0.216549	0.371039	0.457909	NM_031762	1369192_at	Cyclin-dependent kinase inhibitor 1B	Rn.29897	83571	Cdkn1b
9.68081	10.528	10.576	9.14549	10.0906	10.1566	9.25375	10.1821	10.3705	820.756	1476.54	1526.49	566.326	1090.37	1141.41	610.459	1161.76	1323.83	0.389309	0.109559	0.417429	0.35223	0.239916	0.376712	0.281101	0.22272	0.399007	BE104245	1390423_at	MYC binding protein 2	Rn.13538	290447	Mycbp2
5.82518	6.64765	7.01564	4.89627	5.52477	5.90975	5.60776	6.32395	6.87595	56.6962	100.263	129.395	29.78	46.0385	60.119	48.7645	80.1122	117.454	0.282924	0.203146	0.460115	0.286959	0.178872	0.406173	0.265552	0.234656	0.500795	BE101875	1378706_at	Similar to Zinc finger protein 45 (BRC1744)	Rn.50157	680802	LOC680802
4.07179	5.03193	5.1302	3.91929	4.68274	4.86686	3.91041	4.70477	5.09036	16.8163	32.7161	35.0223	15.1295	25.683	29.179	15.0366	26.0782	34.0683	0.161306	0.238066	0.428287	0.085062	0.324026	0.525696	0.209267	0.246354	0.625717	BF415479	1393683_at	Similar to KIAA0368	Rn.154631	313196	RGD1306148
5.46436	6.37315	6.66781	5.18827	6.15105	5.97908	5.22652	6.21213	6.03979	44.1506	82.8914	101.674	36.4607	71.0641	63.0787	37.4403	74.1374	65.7897	0.187009	0.402692	0.334834	0.21463	0.351227	0.317079	0.150926	0.307585	0.422442	BG377412	1384519_at	SEC63 homolog (S. cerevisiae)	Rn.24233	309858	Sec63
5.34936	5.65142	6.7141	5.36862	6.16455	6.73147	5.22784	5.65017	6.31989	40.7679	50.2628	104.989	41.3158	71.7323	106.261	37.4746	50.2193	79.8871	0.395711	0.279609	0.457176	0.405153	0.497168	0.455047	0.263605	0.289259	0.412978	BF402371	1393564_at	Similar to Ubiquitin ligase protein DZIP3 (DAZ-interacting protein 3 homolog)	Rn.162050	303963	RGD1563278
6.79743	7.68242	7.59438	6.25425	7.28567	7.39856	6.59163	7.3957	7.57565	111.232	205.418	193.257	76.3338	156.029	168.729	96.4447	168.394	190.765	0.14248	0.232885	0.364915	0.160652	0.335763	0.340987	0.286749	0.159667	0.374439	BF404303	1398062_at	Small ArfGAP2	Rn.203765	298500	Smap2
4.26906	5.05738	5.28554	4.22525	5.00107	5.04736	4.02676	5.12552	5.12251	19.2804	33.2984	39.0037	18.7037	32.0237	33.0679	16.2995	34.9088	34.8361	0.130527	0.222045	0.270859	0.173805	0.270708	0.41525	0.210649	0.186564	0.277124	BG666358	1395561_at	Heterogeneous nuclear ribonucleoprotein A2/B1	Rn.4057	362361	Hnrnpa2b1
3.85246	4.84524	5.29331	3.24911	3.77153	3.60392	3.75591	4.70434	4.86353	14.4446	28.745	39.2144	9.50779	13.6566	12.1587	13.5096	26.0704	29.1118	0.114818	0.322148	0.485828	0.126809	0.214943	0.190466	0.219974	0.305034	0.465595	AA859008	1395485_s_at	Myosin Ib	Rn.36339	117057	Myo1b
6.4201	6.97331	7.53203	6.26645	7.05563	7.57854	6.33736	6.85517	7.49639	85.6333	125.654	185.083	76.982	133.032	191.147	80.8603	115.774	180.567	0.251552	0.203395	0.443404	0.270703	0.249524	0.459212	0.24454	0.242704	0.50649	BF391127	1376523_at	AT rich interactive domain 4A (Rbp1 like)	Rn.106963	314205	Arid4a
9.08561	10.1295	10.4202	9.80567	10.3868	10.5929	9.27893	9.93102	10.3588	543.302	1120.17	1370.23	894.954	1338.87	1544.47	621.207	976.191	1313.14	0.453736	0.162211	0.277556	0.182384	0.196186	0.314104	0.161599	0.175647	0.337005	BE107525	1375424_at	ARP2 actin-related protein 2 homolog (yeast)	Rn.102249	289820	Actr2
5.59653	6.325	6.68517	5.01754	6.04781	6.2673	5.65867	6.24816	6.49191	48.3864	80.1705	102.905	32.3914	66.1565	77.0274	50.5161	76.0122	90.0035	0.414401	0.128631	0.30938	0.235495	0.221798	0.298192	0.217361	0.14959	0.319451	AW531966	1383049_at	Kelch-like 8 (Drosophila)	Rn.6788	289457	Klhl8
4.99144	5.39079	6.00991	4.58838	5.44576	5.61204	4.67378	5.52571	5.98599	31.8107	41.9556	64.4411	24.0569	43.585	48.9094	25.524	46.0685	63.3815	0.216838	0.329897	0.218827	0.236533	0.351092	0.186287	0.249183	0.283654	0.215161	NM_017267	1398261_at	Translocase of inner mitochondrial membrane 44 homolog (yeast)	Rn.10801	29635	Timm44
5.04235	5.52619	6.21262	3.75793	4.1004	5.09797	4.83059	5.03453	6.33856	32.9533	46.0839	74.1626	13.5285	17.1531	34.2485	28.4546	32.7751	80.9276	0.40665	0.225821	0.609414	0.215434	0.230431	0.521104	0.179265	0.322554	0.470789	AW528011	1391735_at	Transcribed locus	Rn.146938	-	-
5.11377	5.87664	6.0423	4.74605	5.53703	6.08002	4.84899	5.59348	5.78417	34.6257	58.755	65.9043	26.8351	46.4314	67.6501	28.8198	48.2842	55.1072	0.307021	0.265525	0.257196	0.322238	0.284839	0.372713	0.226106	0.258495	0.363052	BI296626	1374909_at	Ankhd1-Eif4ebp3 fusion transcript	Rn.11853	679725	Ankhd1-Eif4ebp3
5.60116	6.12419	6.54686	5.61211	6.39253	6.86481	5.15956	5.92324	6.34177	48.5419	69.7533	93.4978	48.9118	84.0124	116.55	35.7423	60.6838	81.1079	0.264779	0.288844	0.276	0.28395	0.370773	0.237795	0.150193	0.421585	0.274776	AA997271	1382710_at	Transcribed locus	Rn.165422	-	-
5.47063	5.89576	6.30316	5.11394	5.94234	6.28017	5.1675	6.29724	6.23524	44.3429	59.5389	78.966	34.6297	61.4926	77.7176	35.9395	78.6426	75.3346	0.17236	0.178921	0.388054	0.158767	0.321552	0.438443	0.26995	0.251107	0.418418	BF390064	1393596_at	Alpha thalassemia/mental retardation syndrome X-linked (RAD54 homolog, S. cerevisiae)	Rn.107838	246284	Atrx
4.56736	5.15086	5.26342	3.98335	4.95549	4.96982	3.93955	4.80675	5.28009	23.709	35.5274	38.4103	15.8164	31.0278	31.3375	15.3434	27.9883	38.8567	0.326793	0.294166	0.488265	0.207345	0.214657	0.399158	0.250607	0.224419	0.482452	BE097285	1385077_at	Golgi-specific brefeldin A resistant guanine nucleotide exchange factor 1	Rn.61235	309451	Gbf1
6.6786	7.51903	7.55026	5.29132	6.22642	6.55823	6.53187	6.98695	7.59817	102.437	183.423	187.437	39.1603	74.8754	94.2375	92.5313	126.847	193.766	0.256796	0.208912	0.417016	0.224748	0.271865	0.456784	0.220174	0.378049	0.434419	AI501213	1397367_at	Hypothetical protein LOC689663	Rn.167316	689663	LOC689663
5.408	6.40748	6.52848	6.04609	6.6106	7.06185	5.57759	6.18644	6.70112	42.459	84.8875	92.3142	66.0776	97.7212	133.607	47.7553	72.8289	104.049	0.150561	0.194443	0.079471	0.038353	0.180279	0.161622	0.141854	0.105781	0.094563	AA956307	1398581_at	Transcribed locus	Rn.8623	-	-
5.99692	6.9392	7.09002	6.45917	7.13184	7.29768	6.07735	6.71676	7.30631	63.8635	122.718	136.241	87.984	140.248	157.333	67.525	105.183	158.277	0.288305	0.215477	0.265568	0.250424	0.12022	0.267566	0.170671	0.272714	0.259425	BF390195	1397772_at	CDNA clone IMAGE:7320582	Rn.17067	-	-
6.95951	7.48322	8.40789	7.64367	7.6552	8.57167	6.87294	7.33102	8.38328	124.458	178.926	339.646	199.974	201.579	380.478	117.209	161.012	333.902	0.634098	0.399577	0.300059	0.349736	0.431106	0.272735	0.330387	0.461888	0.141782	BM958512	1383468_at	Transcribed locus	Rn.22663	-	-
8.47039	9.41804	9.62196	8.03732	8.97036	8.94857	8.5051	9.25487	9.2336	354.684	684.089	787.95	262.709	501.588	494.069	363.321	610.933	601.992	0.199112	0.343848	0.403709	0.201358	0.386349	0.301869	0.273984	0.257141	0.545542	BE111631	1383054_at	Zinc finger protein 91	Rn.1772	246282	Zfp91
3.66526	4.3235	5.12299	3.65953	4.07586	4.81108	3.8019	4.24746	4.82649	12.6868	20.0218	34.8477	12.6365	16.8638	28.0724	13.9472	18.9938	28.3738	0.206166	0.336282	0.404144	0.078363	0.270578	0.599377	0.150256	0.339739	0.608589	BE116564	1390757_at	Cell division cycle 2 homolog (S.pombe)-like 1	Rn.10204	252879	Cdc2l1
5.64351	6.54186	6.73767	6.39895	6.9989	7.1498	5.49034	6.26039	6.73475	49.988	93.1743	106.719	84.3871	127.902	142.005	44.9528	76.6594	106.503	0.184408	0.247013	0.322714	0.240597	0.33718	0.408693	0.308629	0.254463	0.428699	AI407835	1370260_at	Adducin 3 (gamma)	Rn.76589	25230	Add3
9.42654	10.4865	10.7835	9.4276	10.086	10.337	9.80156	10.1996	10.6883	688.131	1434.67	1762.61	688.637	1086.9	1293.44	892.408	1175.94	1650.06	0.598262	0.122156	0.27605	0.249076	0.153212	0.278403	0.197483	0.267915	0.259144	BG669135	1395694_at	F-box protein 9	Rn.3335	300849	Fbxo9
5.13466	5.63412	5.81145	5.05962	6.2747	6.52848	4.93825	5.47563	5.71722	35.1307	49.6637	56.1592	33.3501	77.4235	92.3142	30.6592	44.4968	52.6084	0.251541	0.134041	0.334686	0.253051	0.327586	0.364886	0.271884	0.140859	0.333382	AW435415	1380306_at	Transcribed locus	Rn.54177	-	-
4.90014	5.58998	6.06448	4.77869	5.60604	5.90383	4.82135	5.41923	5.77131	29.86	48.1672	66.9253	27.4492	48.7064	59.8728	28.2729	42.7908	54.6182	0.350918	0.253396	0.225182	0.09293	0.254485	0.393546	0.185878	0.193347	0.353757	BE097847	1381809_at	Ankyrin repeat domain 11	Rn.23844	365023	Ankrd11
5.14164	5.85546	6.1639	4.61132	5.34122	5.78905	5.02602	5.56357	6.16659	35.3011	57.8987	71.6999	24.4425	40.5385	55.294	32.5824	47.2935	71.8338	0.153744	0.226528	0.388726	0.239287	0.216537	0.354433	0.205858	0.212617	0.485126	NM_053671	1387350_at	TATA element modulatory factor 1	Rn.91637	114206	Tmf1
6.61249	7.15397	7.25164	6.45032	7.29431	7.53707	6.07024	6.90757	7.38881	97.8493	142.416	152.392	87.446	156.966	185.731	67.193	120.057	167.592	0.360761	0.285162	0.312923	0.321288	0.230365	0.369009	0.347874	0.245597	0.334317	AW144823	1393933_at	Sortilin-related receptor, LDLR class A repeats-containing	Rn.92871	300652	Sorl1
6.80694	7.79359	7.69877	6.69693	7.59065	7.55314	6.65237	7.48689	7.58796	111.968	221.873	207.759	103.747	192.758	187.811	100.592	179.382	192.399	0.276876	0.268448	0.399047	0.190127	0.296252	0.385736	0.303689	0.290541	0.451468	BE098910	1377070_at	Splicing factor 3b, subunit 2	Rn.103341	293671	Sf3b2
5.08441	5.7858	6.55485	5.53527	5.50193	6.09544	5.11298	5.80783	6.56306	33.9281	55.1695	94.017	46.3748	45.3154	68.377	34.6067	56.0184	94.5536	0.290182	0.158878	0.431327	0.188126	0.256426	0.518498	0.1694	0.283702	0.499204	BG663056	1382847_at	Ash1 (absent, small, or homeotic)-like (Drosophila)	Rn.206058	310638	Ash1l
8.16055	8.8806	9.11368	8.05223	8.86964	9.21312	7.93967	8.50893	9.03246	286.135	471.332	553.976	265.438	467.765	593.506	245.515	364.287	523.65	0.229587	0.147067	0.415995	0.202541	0.207145	0.292062	0.253336	0.177417	0.369936	NM_022799	1369775_at	Nuclear casein kinase and cyclin-dependent kinase substrate 1	Rn.21324	64709	Nucks1
8.08984	8.34816	8.69951	7.18663	8.04603	8.69754	7.65143	8.25611	8.84476	272.449	325.872	415.732	145.677	264.3	415.165	201.053	305.729	459.767	0.559018	0.13851	0.162437	0.114114	0.086611	0.109107	0.237031	0.133772	0.152229	NM_057208	1387617_at	Tropomyosin 3, gamma	Rn.37575	117557	Tpm3
4.43417	5.22191	5.90543	4.56082	4.81803	5.59972	4.41165	4.87022	5.40609	21.6181	37.3209	59.9393	23.6017	28.208	48.4935	21.2833	29.2471	42.4029	0.234272	0.258181	0.433925	0.28645	0.243613	0.439654	0.185059	0.168962	0.366494	NM_017063	1368573_at	Karyopherin (importin) beta 1	Rn.11061	24917	Kpnb1
11.1673	11.764	11.7598	10.7133	11.6299	11.8879	10.6363	11.4722	11.7499	2299.81	3477.9	3467.79	1678.9	3169.19	3789.78	1591.64	2841.03	3444.07	0.240488	0.152097	0.378863	0.217465	0.272732	0.264622	0.228775	0.21002	0.394946	NM_022946	1370053_at	Discs, large (Drosophila) homolog-associated protein 1	Rn.90059	65040	Dlgap1
6.52371	7.36695	7.76722	6.59796	7.12186	7.35176	6.4168	7.07384	7.57491	92.0094	165.072	217.854	96.8688	139.282	163.343	85.4376	134.722	190.667	0.225525	0.24642	0.43598	0.232592	0.334746	0.389355	0.289976	0.207445	0.474752	BE115506	1379715_at	Similar to RIKEN cDNA 2610101N10	Rn.129678	500042	RGD1566227
5.9646	6.31397	6.80424	5.18225	5.68455	6.2836	5.3589	5.9936	6.8953	62.4487	79.5599	111.758	36.3089	51.4304	77.9026	41.0383	63.7167	119.04	0.327081	0.256201	0.489201	0.285271	0.267804	0.57992	0.189031	0.276147	0.472866	BF396857	1394401_at	Transcribed locus	Rn.204953	-	-
3.97684	4.7926	5.19395	3.81957	4.49269	4.81764	3.95876	4.53103	4.8837	15.7452	27.7151	36.6045	14.119	22.5131	28.2003	15.5491	23.1194	29.5216	0.211473	0.296089	0.335449	0.106901	0.241919	0.477757	0.237459	0.302732	0.495065	BE106639	1391838_at	Ankyrin repeat domain 11	Rn.23844	365023	Ankrd11
4.04319	4.60456	5.18231	4.12038	4.58726	5.19556	3.9196	4.34575	5.26587	16.4862	24.3282	36.3104	17.3923	24.0383	36.6454	15.1327	20.333	38.4755	0.17663	0.28931	0.51009	0.252006	0.220095	0.572927	0.209949	0.234677	0.471971	BI295188	1377111_at	Transcribed locus	Rn.39254	-	-
4.97152	5.51356	6.4614	5.25163	5.5361	6.18303	4.96668	5.19683	6.2817	31.3745	45.6822	88.1201	38.0976	46.4015	72.657	31.2694	36.6777	77.8001	0.189734	0.154978	0.423937	0.156085	0.164304	0.405307	0.203795	0.242626	0.299283	BE109084	1394724_at	Transcription elongation factor A (SII) 1	Rn.6738	362479	Tcea1
5.8629	6.72803	6.65911	5.62218	6.75687	6.42995	5.60516	6.14078	6.66089	58.1981	106.008	101.063	49.2544	108.149	86.22	48.6767	70.5601	101.188	0.255764	0.314998	0.205319	0.374954	0.148621	0.293631	0.159025	0.345365	0.253235	BF407455	1377960_at	Transcribed locus	Rn.38402	-	-
3.79828	4.71214	5.0484	4.09695	4.74736	4.76283	3.94671	4.77335	4.80332	13.9122	26.2117	33.0918	17.1122	26.8595	27.1491	15.4198	27.3477	27.9218	0.37656	0.165574	0.347881	0.302561	0.244729	0.496171	0.238828	0.154731	0.342263	AA899256	1390340_a_at	Transcribed locus, strongly similar to NP_001005331.1 eukaryotic translation initiation factor 4, gamma 1 isoform b [Mus musc	Rn.199149	-	-
9.9867	10.8497	10.8658	9.85908	10.7007	10.6971	9.839	10.7383	10.7558	1014.6	1845.38	1866.09	928.707	1664.3	1660.15	915.871	1708.25	1729.09	0.293062	0.1156	0.290507	0.230139	0.204886	0.299038	0.253465	0.229384	0.327312	BE107978	1387071_a_at	Microtubule-associated protein tau	Rn.2455	29477	Mapt
6.74133	7.65827	7.89512	6.71906	7.2661	7.4039	6.66282	7.43754	7.7315	106.99	202.008	238.05	105.351	153.927	169.354	101.323	173.35	212.527	0.249036	0.23887	0.31118	0.138046	0.273752	0.239341	0.295138	0.200946	0.357491	BM387829	1395399_at	Zinc finger, CCHC domain containing 17	Rn.63831	500555	Zcchc17
3.97131	4.81131	4.93829	4.48751	5.18476	5.78344	4.22682	4.67474	5.07378	15.685	28.0769	30.6601	22.4324	36.3721	55.0794	18.724	25.5409	33.6791	0.1612	0.239002	0.311419	0.216374	0.250089	0.47564	0.236912	0.147619	0.396604	BE108537	1378666_at	Rho GTPase activating protein 21	Rn.162259	307178	Arhgap21
9.27369	10.3058	10.1524	8.79099	9.71779	9.50265	9.22322	10.2115	9.87419	618.955	1265.77	1138.09	442.947	842.066	725.409	597.676	1185.68	938.485	0.292983	0.185519	0.331888	0.157173	0.291005	0.251186	0.193569	0.128997	0.413997	AA996943	1382303_at	Phosphatase and actin regulator 1	Rn.22981	306844	Phactr1
6.98419	7.70435	7.93035	7.10207	7.71473	8.10914	6.82545	7.68228	7.84497	126.605	208.565	243.934	137.384	210.071	276.118	113.414	205.398	229.917	0.3015	0.214579	0.464027	0.287439	0.240946	0.414473	0.233633	0.301219	0.346678	AI145433	1380861_at	Transcribed locus	Rn.123698	-	-
8.23513	8.84009	9.03664	7.49307	8.03607	8.45836	7.71589	8.58774	9.00456	301.315	458.281	525.17	180.152	262.481	351.739	210.24	384.74	513.621	0.340475	0.1523	0.367405	0.323429	0.207239	0.462593	0.237379	0.203123	0.288282	BF397054	1379140_at	Transcribed locus	Rn.147337	-	-
3.74535	3.93034	4.03903	4.82792	6.45148	6.46902	3.66096	3.77222	4.03931	13.411	15.2458	16.4388	28.402	87.5163	88.5868	12.6491	13.6632	16.442	0.102451	0.168916	0.19745	0.151173	0.291007	0.45507	0.06412	0.108593	0.197317	BI291162	1391025_at	Transcribed locus	Rn.47994	-	-
4.28746	4.88133	5.60911	4.04463	4.66973	5.16177	4.29659	4.61751	5.27647	19.5278	29.4732	48.8102	16.5027	25.4524	35.7971	19.6518	24.5476	38.7593	0.184292	0.218701	0.334865	0.094928	0.322396	0.594132	0.231022	0.341438	0.547867	AW525946	1398729_s_at	Transmembrane protein 59-like	Rn.203070	306349	Tmem59l
8.53786	9.66875	9.40716	8.80396	9.86963	9.51383	8.74307	9.66183	9.12436	371.665	813.924	678.949	446.947	935.523	731.052	428.476	810.029	558.092	0.24354	0.110473	0.064927	0.066866	0.142703	0.186887	0.221386	0.114084	0.227086	AW434918	1393443_a_at	Family with sequence similarity 158, member A	Rn.163298	290224	Fam158a
7.77614	8.65869	9.17293	8.78928	9.33714	9.47241	7.89301	8.3411	8.8942	219.205	404.134	577.201	442.422	646.784	710.362	237.702	324.281	475.796	0.398804	0.25918	0.366765	0.377653	0.236533	0.202976	0.311158	0.255085	0.345706	BE097259	1380062_at	Membrane protein, palmitoylated 6 (MAGUK p55 subfamily member 6)	Rn.49269	362359	Mpp6
3.5755	4.00108	4.66407	3.42038	4.48525	4.17619	3.37422	4.11058	4.36483	11.9216	16.012	25.3527	10.7062	22.3973	18.0783	10.3691	17.2746	20.6037	0.207175	0.14665	0.344357	0.184029	0.201509	0.397365	0.20781	0.211386	0.296267	AI013798	1394616_at	Mesoderm development candidate 2	Rn.41045	308796	Mesdc2
4.09744	4.79876	5.10203	3.89639	4.23548	4.70591	3.89233	4.82362	5.11148	17.118	27.8337	34.345	14.8912	18.8368	26.0988	14.8494	28.3175	34.5708	0.134997	0.198169	0.285707	0.160785	0.126243	0.156482	0.191583	0.246069	0.359835	BI300470	1375689_at	Transcribed locus	Rn.205048	-	-
6.24741	6.71244	7.13436	6.1461	6.83798	7.43947	5.94235	6.39524	7.0731	75.9727	104.869	140.494	70.8207	114.403	173.582	61.493	84.1703	134.653	0.173411	0.106731	0.477401	0.276221	0.250454	0.49246	0.323093	0.243351	0.433302	BF387898	1379460_at	SH3-domain GRB2-like (endophilin) interacting protein 1	Rn.19477	313413	Sgip1
5.3622	6.02541	6.59091	4.43857	4.71434	5.01229	4.91559	5.6394	6.27534	41.1323	65.1372	96.3966	21.6842	26.2517	32.2738	30.1814	49.8458	77.4579	0.201362	0.208444	0.3788	0.147581	0.210324	0.2197	0.214947	0.298191	0.402707	BF417891	1395023_at	Transcribed locus	Rn.63277	-	-
9.02098	9.49787	10.3863	6.84669	7.2121	8.01257	8.96232	9.24604	10.0474	519.5	723.009	1338.41	115.096	148.272	258.24	498.801	607.205	1058.2	0.326448	0.164388	0.363042	0.192473	0.280256	0.392168	0.254925	0.298911	0.318076	AA996810	1381445_at	Transcribed locus	Rn.59109	-	-
8.23287	8.77606	9.27964	6.90014	7.11155	7.87543	8.08766	8.79383	9.41714	300.844	438.387	621.513	119.44	138.29	234.823	272.037	443.82	683.662	0.487008	0.140861	0.251933	0.225678	0.193744	0.382494	0.274986	0.186033	0.228639	AI111738	1379765_at	Nemo like kinase	Rn.113514	497961	Nlk
7.20891	7.92509	7.8489	7.10894	7.97916	8.21249	7.00087	7.80426	7.89791	147.944	243.047	230.544	138.04	252.329	296.624	128.077	223.52	238.511	0.276466	0.273263	0.378136	0.303529	0.360751	0.196664	0.241986	0.223424	0.44572	BF420722	1370946_at	Nuclear factor I/X (CCAAT-binding transcription factor)	Rn.56776	81524	Nfix
6.9038	7.9323	7.87467	8.33753	9.36233	8.85584	6.83112	7.42096	7.68288	119.743	244.264	234.699	323.479	658.176	463.312	113.86	171.369	205.484	0.31821	0.278277	0.216234	0.407054	0.203532	0.408861	0.18525	0.333305	0.206341	BF420311	1398445_at	Transcribed locus	Rn.170107	-	-
6.07679	7.19163	6.62754	6.15364	7.39758	6.31827	5.63843	6.49301	6.52312	67.4988	146.183	98.8754	71.1918	168.614	79.7974	49.8123	90.0722	91.9718	0.246648	0.314079	0.284002	0.129014	0.164517	0.2831	0.161438	0.502372	0.24561	BM391661	1391552_at	Transcribed locus	Rn.25189	-	-
5.04769	5.96775	6.00876	4.89341	5.62207	5.87574	4.99772	5.19852	6.10202	33.0755	62.5852	64.3898	29.721	49.2506	58.7184	31.9495	36.7207	68.6896	0.187472	0.155626	0.365497	0.198063	0.181473	0.334941	0.231878	0.379652	0.217538	BF398331	1391510_at	Estrogen receptor binding site associated, antigen, 9	Rn.64132	299864	Ebag9
10.9519	11.9432	11.7233	10.8699	11.8264	11.8025	11.1046	11.8276	11.7586	1980.84	3937.87	3381.15	1871.4	3631.63	3571.96	2202	3634.65	3464.9	0.248073	0.057225	0.179596	0.175252	0.083049	0.142964	0.234147	0.078503	0.103385	BE097557	1396405_at	Transcribed locus	Rn.98620	-	-
7.95613	8.70071	8.81565	7.92996	8.51606	8.93211	7.63587	8.24691	8.78296	248.333	416.078	450.583	243.869	366.091	488.465	198.896	303.786	440.488	0.197425	0.21703	0.370102	0.198093	0.264403	0.334295	0.253436	0.167171	0.464627	BF554739	1384154_at	Transcribed locus, strongly similar to NP_446218.1 WW domain binding protein 4 (formin binding protein 21) [Rattus norvegicus	Rn.175124	-	-
7.41699	8.05814	7.97433	7.43313	8.63957	8.56722	7.14088	7.84508	7.78836	170.898	266.527	251.485	172.82	398.813	379.306	141.13	229.935	221.07	0.231316	0.258062	0.404473	0.289496	0.33762	0.288328	0.227509	0.270756	0.33843	BI289620	1391448_at	Cysteine rich transmembrane BMP regulator 1 (chordin like)	Rn.54364	298744	Crim1
2.776	3.49239	3.63258	2.99744	3.65772	3.44371	2.80017	3.81835	3.98399	6.84951	11.2542	12.4027	7.98582	12.6207	10.8808	6.96523	14.1071	15.8234	0.219798	0.280587	0.211539	0.188097	0.207185	0.362361	0.160503	0.379423	0.284962	BF400832	1375388_at	Transcribed locus	Rn.207831	-	-
8.8052	9.76118	9.57698	7.49966	8.55754	8.36797	8.8588	9.63532	9.35855	447.331	867.777	763.762	180.977	376.77	330.377	464.263	795.281	656.454	0.19618	0.221584	0.339368	0.143143	0.282933	0.353626	0.231652	0.181797	0.366748	AI555865	1394422_at	Tubulin tyrosine ligase-like family, member 7	Rn.158385	310982	Ttll7
9.31415	10.0461	10.6064	9.26289	9.52763	10.3631	9.30665	9.56104	10.3128	636.559	1057.25	1558.99	614.339	738.078	1317.06	633.258	755.37	1271.93	0.255356	0.343226	0.307479	0.243818	0.449935	0.318611	0.28252	0.382478	0.410271	AW534965	1382238_at	Cell division cycle and apoptosis regulator 1	Rn.92786	361849	Ccar1
6.46174	7.14013	7.24059	6.30437	7.02175	7.21258	6.12129	6.85877	7.22182	88.1409	141.057	151.229	79.0323	129.944	148.321	69.6132	116.063	149.274	0.296842	0.115627	0.401077	0.217743	0.088986	0.297832	0.223928	0.241463	0.243482	BG664036	1395826_at	Protein phosphatase 2, regulatory subunit B', epsilon isoform	Rn.24394	299147	Ppp2r5e
6.62101	7.30039	8.0453	6.07208	6.33823	6.8409	6.76517	6.86655	8.0102	98.4289	157.629	264.166	67.2788	80.9091	114.635	108.772	116.691	257.816	0.378567	0.143465	0.456626	0.199235	0.292417	0.436179	0.162984	0.185028	0.281789	BE099283	1385393_at	Transcribed locus	Rn.131829	-	-
7.52023	8.12552	7.95936	7.78542	8.81496	8.94306	7.25551	8.0055	8.09326	183.576	279.271	248.889	220.62	450.368	492.186	152.801	256.978	273.095	0.120424	0.152167	0.216191	0.226032	0.270569	0.314407	0.239926	0.106949	0.446478	BI296503	1375765_at	Hippocalcin-like 4	Rn.34529	50872	Hpcal4
4.90542	5.55487	5.99549	4.67932	5.26586	5.56374	4.73318	5.12363	5.89879	29.9694	47.0092	63.8002	25.6222	38.4753	47.2991	26.5968	34.8631	59.664	0.112824	0.223214	0.30667	0.098755	0.198724	0.343076	0.154146	0.200199	0.349107	AA901035	1384871_at	Oxysterol binding protein-like 6	Rn.15167	311129	Osbpl6
8.51408	9.81127	9.19916	8.30896	9.14272	8.61327	8.51162	9.64346	8.90766	365.589	898.435	587.791	317.136	565.24	391.609	364.966	799.78	480.256	0.256837	0.256438	0.435524	0.202682	0.311377	0.480084	0.281714	0.188403	0.421535	BF393192	1396512_at	Transcribed locus	Rn.169783	-	-
9.61249	10.4845	10.8208	9.80447	10.356	10.653	9.80308	10.2987	10.6198	782.795	1432.68	1808.78	894.21	1310.59	1610.17	893.349	1259.56	1573.54	0.496596	0.094468	0.343949	0.240594	0.169678	0.270732	0.198131	0.119543	0.29268	BG378149	1389957_at	Transcribed locus, strongly similar to NP_001101785.1 tetratricopeptide repeat domain 3 [Rattus norvegicus]	Rn.216436	-	-
6.67459	7.70301	7.47309	5.26201	6.13161	5.95958	6.64825	7.44825	7.33205	102.153	208.371	177.674	38.3727	70.113	62.2318	100.305	174.641	161.127	0.241853	0.056599	0.323824	0.155773	0.190725	0.204119	0.208371	0.107929	0.234077	NM_031642	1387060_at	Kruppel-like factor 6	Rn.163355	58954	Klf6
4.94402	5.78159	5.57788	4.37857	4.78996	5.35578	4.47598	5.42382	5.46266	30.7821	55.0088	47.7649	20.8008	27.6644	40.9497	22.2538	42.9272	44.0986	0.221094	0.198146	0.354817	0.173755	0.316764	0.308384	0.315968	0.246057	0.399308	BE121056	1381644_at	Transcribed locus	Rn.170556	-	-
7.52938	8.24077	8.41469	7.66787	8.28662	8.51167	7.38228	8.06688	8.46606	184.744	302.496	341.251	203.357	312.263	364.979	166.835	268.147	353.621	0.460158	0.132222	0.267071	0.228714	0.103635	0.281761	0.200965	0.114519	0.244925	U48809	1370535_at	Myelin transcription factor 1-like	Rn.10559	116668	Myt1l
4.97672	6.174	6.0857	4.8554	5.49781	5.19718	5.15071	5.92995	5.77151	31.4878	72.2037	67.917	28.9482	45.1862	36.6866	35.5237	60.9667	54.6258	0.256188	0.399	0.200496	0.127488	0.233909	0.184706	0.179932	0.174679	0.34112	AI113308	1395745_at	Transcribed locus	Rn.166667	-	-
9.78868	10.687	10.838	10.258	10.88	10.8804	9.88029	10.534	10.8341	884.476	1648.57	1830.47	1224.52	1884.54	1885.07	942.462	1482.69	1825.53	0.263434	0.091983	0.225451	0.157873	0.111845	0.187902	0.157244	0.141749	0.191449	NM_031718	1370087_at	RAB2A, member RAS oncogene family	Rn.44916	65158	Rab2a
8.60363	9.36817	9.88823	8.18435	8.49519	9.03028	8.85057	9.36188	9.78559	389.001	660.846	947.663	290.894	360.834	522.86	461.623	657.971	882.584	0.113142	0.131544	0.199748	0.108681	0.181088	0.356941	0.155792	0.197538	0.370497	BF563206	1378245_at	Family with sequence similarity 81, member A	Rn.163030	315789	Fam81a
7.04151	7.93867	8.41185	7.93844	8.23321	8.40541	7.35006	8.02196	8.23956	131.736	245.345	340.58	245.306	300.915	339.063	163.151	259.927	302.242	0.482875	0.123971	0.186666	0.254288	0.141203	0.190375	0.219794	0.131741	0.197112	AA924061	1377926_at	Centaurin, gamma 2	Rn.25493	316611	Centg2
6.09181	7.06792	7.49125	7.18937	7.26728	7.50856	6.37558	6.97436	7.43072	68.2052	134.17	179.925	145.954	154.053	182.097	83.0311	125.745	172.532	0.416392	0.132301	0.149682	0.121738	0.110919	0.222893	0.12032	0.148324	0.148363	AW524670	1394427_at	CDNA clone IMAGE:7461677	Rn.17118	-	-
6.8254	7.62581	7.53341	6.80727	7.85736	7.6752	6.84899	7.71482	7.3207	113.41	197.514	185.26	111.993	231.9	204.393	115.279	210.084	159.864	0.323976	0.19252	0.155004	0.116988	0.178819	0.243897	0.068137	0.216472	0.271962	AI501693	1386063_at	Transcribed locus	Rn.165284	-	-
8.86728	9.4201	9.56433	8.9838	9.71636	10.0921	8.54685	9.21868	9.52219	467	685.066	757.095	506.283	841.232	1091.5	373.988	595.798	735.3	0.119644	0.089207	0.126727	0.124818	0.126029	0.190983	0.122097	0.090418	0.104499	BI288315	1380517_at	Zinc finger, MYM-type 3	Rn.92967	317260	Zmym3
8.70058	9.45501	9.62701	8.51655	9.09511	9.48357	8.55641	9.00854	9.5986	416.04	701.846	790.713	366.216	546.891	715.878	376.475	515.04	775.294	0.20508	0.193541	0.293051	0.170545	0.270586	0.345825	0.243501	0.17497	0.301712	BF550329	1385921_at	Zinc finger CCCH-type containing 15	Rn.129005	362154	Zc3h15
6.33175	6.95858	6.9851	6.34377	7.20362	7.37401	6.11196	6.8133	6.99185	80.5465	124.377	126.685	81.2204	147.403	165.882	69.1645	112.462	127.279	0.169147	0.130443	0.211847	0.169797	0.160762	0.2569	0.228394	0.165184	0.190447	BI274148	1378086_at	Transcribed locus	Rn.18371	-	-
9.13953	9.55269	10.1289	8.40644	8.78961	9.40252	8.894	9.41703	10.1483	563.992	751.011	1119.7	339.305	442.523	676.769	475.73	683.61	1134.86	0.334443	0.177372	0.273278	0.235981	0.161182	0.380306	0.185308	0.207336	0.248733	BE115141	1392587_at	Transcribed locus	Rn.51225	-	-
6.66128	7.40907	7.81689	6.59335	7.04146	7.41745	6.64997	7.24444	7.54252	101.215	169.962	225.485	96.5597	131.732	170.952	100.425	151.633	186.434	0.33285	0.125097	0.276713	0.166147	0.210966	0.279343	0.19139	0.161868	0.295976	BI294718	1391050_at	Metal response element binding transcription factor 2	Rn.20300	360905	Mtf2
9.56722	10.2985	10.5394	9.59595	10.2198	10.4822	9.57607	10.1459	10.4958	758.613	1259.38	1488.25	773.871	1192.52	1430.4	763.281	1132.97	1443.94	0.324263	0.149863	0.355447	0.178649	0.194528	0.32957	0.203145	0.154599	0.346492	NM_019377	1386999_at	Tyrosine 3-monooxygenase/tryptophan 5-monooxygenase activation protein, beta polypeptide	Rn.8653	56011	Ywhab
6.65995	7.81276	7.64258	9.38263	10.165	9.86211	6.91088	7.64882	7.38975	101.122	224.841	199.823	667.503	1148.07	930.66	120.332	200.689	167.701	0.421046	0.140911	0.222131	0.16534	0.206501	0.264777	0.241363	0.238563	0.259517	BF405070	1398550_at	Transcribed locus	Rn.27636	-	-
8.40721	9.27495	9.26289	8.275	8.99471	9.18416	8.35649	8.97735	9.09962	339.486	619.496	614.339	309.758	510.126	581.711	327.759	504.024	548.603	0.282238	0.214901	0.321751	0.207196	0.297397	0.261925	0.234607	0.232116	0.29305	AI706785	1370262_at	Metadherin	Rn.6864	170910	Mtdh
5.91675	6.96006	6.55931	5.73812	7.03935	5.91827	5.84403	6.54814	6.43305	60.4114	124.505	94.3081	53.376	131.539	60.4751	57.4418	93.5808	86.4054	0.323862	0.187315	0.276235	0.200606	0.281818	0.142487	0.14839	0.194708	0.231875	BF555100	1397307_at	Transcribed locus	Rn.168452	-	-
3.66797	4.11626	4.70937	3.35304	3.68375	4.23705	3.33479	3.96717	4.50629	12.7107	17.3427	26.1614	10.218	12.8505	18.8573	10.0896	15.64	22.7263	0.23628	0.175523	0.349058	0.090549	0.166048	0.438092	0.08617	0.206914	0.469901	BF400868	1398486_at	Transcribed locus, strongly similar to XP_001064186.1 PREDICTED: similar to melanoma inhibitory activity 3 [Rattus norvegicus	Rn.216938	-	-
6.20511	6.69725	7.11229	4.656	5.20168	5.74866	5.94399	6.35089	7.02914	73.7776	103.77	138.361	25.2113	36.8012	53.7674	61.5629	81.6222	130.612	0.238261	0.14461	0.441357	0.198217	0.285593	0.354439	0.214117	0.250563	0.353192	AW523015	1394446_at	Transcribed locus	Rn.35743	-	-
5.42488	6.65334	6.10701	4.7848	5.26162	5.48281	5.34612	6.08276	6.08316	42.9587	100.66	68.9276	27.5657	38.3624	44.7188	40.6764	67.7787	67.7975	0.151594	0.27985	0.283589	0.106711	0.213427	0.381585	0.289458	0.332312	0.296527	BE119808	1396567_at	ESTs	-	-	-
6.03559	6.71001	6.97803	4.96598	5.83047	5.8226	5.86598	6.40133	6.61295	65.5985	104.692	126.066	31.2542	56.9045	56.5949	58.3225	84.5264	97.8805	0.251307	0.174532	0.361184	0.229975	0.217488	0.329072	0.248077	0.184559	0.400538	AF037071	1370438_at	Nitric oxide synthase 1 (neuronal) adaptor protein	Rn.9903	192363	Nos1ap
8.04614	8.72552	8.86109	7.28429	8.0686	7.97512	7.84495	8.43317	8.8948	264.32	423.295	465.001	155.88	268.467	251.623	229.914	345.65	475.994	0.259377	0.108278	0.300276	0.233219	0.115949	0.315844	0.250874	0.280743	0.264401	NM_012806	1369102_at	Mitogen activated protein kinase 10	Rn.9911	25272	Mapk10
5.74733	6.19888	6.45568	5.47791	6.17024	6.45404	5.52033	6.2752	6.5112	53.7179	73.4596	87.7715	44.5672	72.0157	87.6717	45.8971	77.4504	91.2151	0.314005	0.100255	0.36305	0.246094	0.2846	0.292273	0.23669	0.160079	0.322147	AI059015	1382434_at	Transcribed locus	Rn.166227	-	-
7.57934	8.032	8.46676	7.50413	7.97576	8.74844	7.22906	7.44852	8.3098	191.253	261.742	353.793	181.538	251.735	430.074	150.025	174.674	317.321	0.231163	0.293658	0.409636	0.323902	0.337367	0.362799	0.256493	0.268935	0.44291	AI556851	1386525_at	THO complex 2	Rn.35526	313308	Thoc2
4.88173	5.69015	5.60975	4.65721	5.34531	5.74171	4.70013	5.13451	5.51615	29.4813	51.6304	48.8318	25.2325	40.6536	53.509	25.9944	35.127	45.7643	0.086279	0.170113	0.177203	0.170029	0.128195	0.202329	0.139102	0.213956	0.160657	BF420742	1381496_x_at	Transcribed locus	Rn.125958	-	-
9.5646	10.4871	10.5333	9.76719	10.2958	10.4752	9.50306	10.1386	10.3059	757.236	1435.26	1481.97	871.399	1257.03	1423.47	725.615	1127.26	1265.86	0.30878	0.163784	0.299851	0.191363	0.246484	0.272665	0.199724	0.231471	0.316399	BI280928	1382721_at	Gametogenetin binding protein 2	Rn.48466	360584	Ggnbp2
7.66737	7.87018	8.48369	6.98262	7.52439	7.97309	7.17237	7.90998	8.29682	203.286	233.97	357.969	126.467	184.106	251.269	144.244	240.514	314.479	0.32278	0.158786	0.285742	0.283924	0.175055	0.421135	0.262127	0.167247	0.210393	BI301478	1377116_at	Ribonuclease L (2',5'-oligoisoadenylate synthetase-dependent)	Rn.107928	359726	Rnasel
6.53692	7.1525	7.5009	6.42128	7.0437	7.52777	6.69268	6.97093	7.5514	92.8558	142.271	181.132	85.7034	131.937	184.537	103.442	125.447	187.585	0.399618	0.209729	0.278824	0.295855	0.261354	0.333663	0.203603	0.12146	0.249248	AI502211	1377345_at	Transcribed locus	Rn.219232	-	-
8.34996	8.82152	9.39807	7.7827	8.22869	8.68901	8.34851	8.76415	9.45934	326.278	452.42	674.685	220.204	299.973	412.717	325.951	434.782	703.955	0.50447	0.230768	0.172195	0.186187	0.205709	0.245891	0.209411	0.191431	0.158001	AF093267	1370656_a_at	Homer homolog 1 (Drosophila)	Rn.37500	29546	Homer1
3.62064	4.26079	4.42924	3.5344	4.41917	4.47402	3.53152	4.11968	4.20882	12.3005	19.1702	21.5444	11.5867	21.3945	22.2236	11.5636	17.3839	18.4919	0.2335	0.126322	0.285785	0.264503	0.318017	0.291156	0.133792	0.199431	0.417762	AI070638	1382658_at	Similar to Myeloid/lymphoid or mixed-lineage leukemia protein 3 homolog (Histone-lysine N-methyltransferase, H3 lysine-4 spec	Rn.164602	502710	LOC502710
3.1609	3.55654	3.83854	2.9366	3.83215	4.10494	3.04961	3.66906	3.73484	8.94387	11.7659	14.3059	7.65605	14.2427	17.2072	8.27988	12.7203	13.3137	0.179687	0.092486	0.350631	0.131093	0.301579	0.497344	0.1915	0.228969	0.37848	BE112446	1390630_at	Transcribed locus	Rn.160378	-	-
9.61793	10.3289	10.1412	9.23049	10.0239	10.0403	9.30685	10.0812	10.2114	785.752	1286.2	1129.29	600.695	1041.11	1053.01	633.346	1083.29	1185.6	0.27244	0.216081	0.303856	0.205965	0.118451	0.282411	0.189299	0.219054	0.180245	BE105879	1385754_s_at	Leucine rich repeat containing 4	Rn.198672	641521	Lrrc4
7.53117	8.22097	8.49148	7.61746	8.19394	8.44229	7.57279	8.15121	8.437	184.973	298.372	359.907	196.374	292.834	347.842	190.387	284.288	346.569	0.328492	0.208819	0.197147	0.288254	0.307363	0.186394	0.278193	0.191968	0.152631	BG380736	1376931_at	Similar to Hepatocellular carcinoma-associated antigen 58 homolog	Rn.38255	311575	RGD1305020
9.87766	10.7178	10.9015	10.4191	10.8911	11.2338	10.0718	10.466	10.955	940.745	1684.14	1912.84	1369.18	1899.1	2408.3	1076.25	1414.43	1985.11	0.256325	0.125523	0.174143	0.15446	0.083739	0.192883	0.052987	0.085635	0.122213	BF396270	1387872_at	Transcribed locus, strongly similar to NP_001034218.1 heterogeneous nuclear ribonucleoprotein A1 isoform b [Mus musculus]	Rn.115866	-	-
8.77713	8.98766	9.69898	8.60801	8.9086	9.53183	8.50729	8.91325	9.89561	438.712	507.639	831.159	390.184	480.569	740.23	363.873	482.121	952.523	0.445603	0.222319	0.322739	0.271787	0.176486	0.394402	0.284208	0.148532	0.237402	AA955175	1376302_at	Transcribed locus	Rn.203515	-	-
8.71128	9.37023	9.39222	7.61664	8.29815	8.29708	8.3305	8.93758	9.46495	419.138	661.79	671.955	196.262	314.769	314.536	321.907	490.32	706.698	0.381477	0.218975	0.281496	0.255608	0.159287	0.240768	0.292798	0.139676	0.236459	NM_012731	1368972_at	Neurotrophic tyrosine kinase, receptor, type 2	Rn.11246	25054	Ntrk2
4.45905	4.82533	5.35177	4.81564	5.35513	5.92231	4.42518	4.81924	5.454	21.9942	28.351	40.836	28.1613	40.9312	60.6447	21.4838	28.2316	43.8347	0.23503	0.193185	0.299693	0.316816	0.238362	0.360024	0.136961	0.238871	0.347494	BF284914	1377896_at	RAB22A, member RAS oncogene family	Rn.37799	366265	Rab22a
5.0839	5.92228	6.04876	5.84403	6.18971	6.14731	4.84958	5.50628	6.02994	33.9161	60.6435	66.2	57.4418	72.9942	70.8802	28.8316	45.4523	65.3421	0.472628	0.161332	0.344422	0.190547	0.145429	0.314857	0.173367	0.186387	0.187813	BM391856	1391078_at	Replication factor C (activator 1) 1	Rn.103272	89809	Rfc1
5.9995	6.69165	6.66623	5.82114	6.35382	6.76435	5.7882	6.27832	6.855	63.9778	103.368	101.563	56.5376	81.7882	108.711	55.2614	77.618	115.761	0.307877	0.10907	0.322575	0.311313	0.205617	0.342363	0.174121	0.301113	0.141393	BE098713	1375377_at	Similar to immunoglobulin superfamily, member 3	Rn.165978	683623	LOC683623
4.65897	5.14111	5.76241	4.70666	5.17201	5.44834	4.68599	5.39242	5.56172	25.2633	35.2881	54.2823	26.1123	36.0521	43.663	25.7409	42.003	47.2329	0.199861	0.131532	0.408692	0.19351	0.228346	0.266502	0.21927	0.220713	0.347888	BF408438	1375721_at	Transcribed locus	Rn.8959	-	-
8.19768	8.85977	9.43321	8.13383	8.24257	8.65281	8.62546	9.06151	9.79385	293.594	464.576	691.32	280.884	302.873	402.49	394.932	534.301	887.652	0.192614	0.359625	0.187065	0.17587	0.204646	0.195949	0.230005	0.280227	0.187892	BF544005	1395335_at	Transcribed locus	Rn.199163	-	-
7.26173	7.95904	8.53651	5.98617	6.08039	6.53345	7.23716	7.76048	8.26615	153.461	248.834	371.318	63.3894	67.6674	92.6327	150.87	216.839	307.864	0.271418	0.129641	0.375154	0.161774	0.16459	0.400139	0.168663	0.234932	0.464943	BG376849	1382898_at	Transcribed locus	Rn.66436	-	-
5.47377	6.17026	6.52426	5.40014	5.9506	6.47915	5.75291	6.1761	6.27633	44.4395	72.0167	92.0445	42.2284	61.8456	89.211	53.926	72.3088	77.511	0.212979	0.193194	0.295399	0.144714	0.317833	0.460696	0.135738	0.086173	0.369259	H32100	1394010_at	Remodeling and spacing factor 1	Rn.23988	308839	Rsf1
4.77138	5.22521	5.60408	4.42215	4.82104	5.32636	4.6104	5.24792	5.71142	27.3104	37.4063	48.6403	21.4388	28.2669	40.1231	24.4269	37.9998	52.3973	0.193504	0.082571	0.28335	0.178023	0.128806	0.284477	0.199354	0.153962	0.301206	BE108162	1375724_at	Similar to testhymin	Rn.204577	500026	RGD1563612
5.62338	6.27327	6.05548	5.19188	6.32861	5.87658	5.25378	6.00233	5.94479	49.2954	77.3468	66.5091	36.552	80.3714	58.7526	38.1545	64.1034	61.5971	0.244265	0.198125	0.300537	0.213773	0.159541	0.305255	0.258285	0.15858	0.274221	AF102853	1370668_a_at	Connector enhancer of kinase suppressor of Ras 2	Rn.42893	59322	Cnksr2
11.6298	12.1064	12.0802	11.2024	11.9625	12.2306	11.116	11.9282	11.9366	3168.97	4409.5	4330.15	2356.45	3990.9	4805.93	2219.47	3897.14	3919.9	0.247259	0.124569	0.318259	0.324381	0.27417	0.18169	0.195112	0.187823	0.319829	AA818804	1385235_at	Ataxin 2 binding protein 1	Rn.92540	302920	A2bp1
8.20279	9.02635	9.25463	8.60106	8.83502	9.41748	8.30112	8.93717	9.04722	294.636	521.437	610.831	388.309	456.674	683.823	315.418	490.181	529.035	0.354657	0.176775	0.200328	0.161637	0.153084	0.177628	0.184918	0.148975	0.303974	BG378620	1370176_at	Trafficking protein, kinesin binding 2	Rn.26957	171086	Trak2
6.72941	7.2005	7.59607	6.24271	6.76896	7.37488	6.49744	6.91871	7.35562	106.109	147.084	193.484	75.7256	109.059	165.982	90.3492	120.987	163.781	0.226267	0.143522	0.289689	0.192916	0.150443	0.203828	0.165901	0.117866	0.284313	BI296596	1373511_at	Transcribed locus	Rn.164311	-	-
8.38336	9.13968	9.02597	8.40452	9.35473	9.51547	8.53137	8.80415	9.04834	333.92	564.05	521.3	338.854	654.718	731.883	369.997	447.006	529.446	0.14171	0.213197	0.303191	0.155716	0.327581	0.336826	0.252927	0.214475	0.314625	AI706673	1391625_at	Transcribed locus, strongly similar to NP_082735.1 Wiskott-Aldrich syndrome-like [Mus musculus]	Rn.126640	-	-
6.28006	7.28483	7.57756	6.75844	6.9737	7.2407	6.7782	7.17658	7.48744	77.7117	155.938	191.017	108.266	125.688	151.24	109.759	144.666	179.45	0.476996	0.111676	0.150931	0.047287	0.155331	0.174562	0.108701	0.080918	0.203984	AA819672	1381124_at	Transcribed locus	Rn.66488	-	-
3.59164	3.78586	4.61758	3.62573	3.56783	4.40225	3.45494	3.96549	4.88087	12.0557	13.793	24.5488	12.3439	11.8583	21.1451	10.9658	15.6218	29.4638	0.090554	0.177195	0.213532	0.144064	0.102707	0.287233	0.092521	0.187692	0.299932	AI576602	1393406_at	Transcribed locus	Rn.205449	-	-
5.38528	5.95665	6.42924	5.91489	6.47734	6.87196	5.41542	5.77217	6.16957	41.7956	62.1055	86.1775	60.3336	89.0992	117.129	42.678	54.6508	71.9823	0.18228	0.218373	0.301398	0.204889	0.341639	0.230581	0.25971	0.183333	0.317175	BF392753	1379379_at	ESTs	-	-	-
6.67117	7.08044	7.69505	6.87341	7.05359	7.88907	6.57794	6.89283	7.69023	101.911	135.34	207.224	117.247	132.844	237.054	95.5338	118.836	206.533	0.304088	0.092366	0.173716	0.202843	0.144404	0.229347	0.167622	0.205402	0.144697	BF400575	1375701_at	Methyltransferase 10 domain containing	Rn.203131	360568	Mett10d
4.96911	5.83432	6.04893	5.30842	5.53275	5.84648	5.0606	5.56075	6.02451	31.3221	57.0565	66.2078	39.6272	46.2939	57.5395	33.3728	47.2011	65.0966	0.313991	0.2993	0.173362	0.256894	0.305449	0.215161	0.211029	0.251873	0.202191	AF092207	1387944_at	Coiled-coil domain containing 5	Rn.163388	192228	Ccdc5
5.93121	6.38688	6.41458	5.6948	6.36858	6.85424	5.61679	6.09128	6.56369	61.02	83.684	85.3063	51.7971	82.6292	115.7	49.0707	68.1802	94.5949	0.172557	0.167282	0.285373	0.195587	0.21628	0.455544	0.264348	0.15678	0.056298	AW527230	1386097_at	Ankyrin repeat domain 12	Rn.94994	316775	Ankrd12
6.5021	7.39248	7.34551	7.91466	8.56886	8.49039	6.53088	7.32384	7.08733	90.6415	168.019	162.637	241.296	379.738	359.635	92.4679	160.212	135.987	0.336894	0.142117	0.308806	0.195809	0.165332	0.322667	0.189875	0.172374	0.364436	AA799421	1374593_at	Protein kinase C, epsilon	Rn.216481	29340	Prkce
4.33545	4.72602	5.5068	4.34017	4.50402	5.32619	4.2369	4.53663	5.24789	20.1883	26.4651	45.4686	20.2545	22.6906	40.1183	18.8553	23.2093	37.999	0.261974	0.32667	0.332502	0.186944	0.295696	0.434542	0.273106	0.209951	0.574807	BF543757	1395264_at	RAP1 interacting factor homolog (yeast)	Rn.20916	295602	Rif1
9.20325	9.71198	9.69083	7.54286	8.5043	8.13543	8.50657	9.26719	9.45573	589.46	838.682	826.477	186.478	363.119	281.196	363.691	616.172	702.196	0.268531	0.277443	0.159771	0.349274	0.158999	0.197889	0.278614	0.332013	0.180153	AA819268	1371776_at	Transcribed locus	Rn.163585	-	-
4.26577	5.15766	5.13583	4.9072	5.11858	5.63775	4.32586	4.87976	5.26587	19.2364	35.6952	35.1592	30.0064	34.7413	49.7888	20.0546	29.4411	38.4755	0.205028	0.211	0.275757	0.139018	0.26605	0.374985	0.128182	0.202724	0.417492	BI291600	1377262_at	SMEK homolog 2, suppressor of mek1 (Dictyostelium)	Rn.35621	360993	Smek2
7.92032	8.28785	8.78148	7.4964	8.00518	8.41799	7.67543	8.32358	8.59115	242.244	312.53	440.037	180.568	256.921	342.033	204.425	320.367	385.65	0.239385	0.181961	0.283568	0.137369	0.276386	0.426363	0.197629	0.157284	0.469138	BE105398	1397203_at	PRP4 pre-mRNA processing factor 4 homolog B (yeast)	Rn.32654	291078	Prpf4b
5.94057	6.5483	6.80138	5.92994	6.17401	6.7138	5.62774	6.21461	6.71421	61.4172	93.5911	111.537	60.9663	72.2042	104.968	49.4446	74.265	104.997	0.210163	0.253492	0.375054	0.16003	0.348154	0.252245	0.199748	0.204129	0.382534	BM383704	1377501_at	Zinc finger protein 317	Rn.159405	500950	Zfp317
4.5102	4.84437	5.44197	4.46345	5.068	5.261	4.41793	5.04049	5.32979	22.788	28.7277	43.4707	22.0614	33.5444	38.3459	21.3761	32.9108	40.2186	0.179793	0.167228	0.282073	0.152332	0.252194	0.353178	0.12806	0.125229	0.34972	BF396749	1380446_at	Myeloid/lymphoid or mixed-lineage leukemia (trithorax homolog, Drosophila); translocated to, 10	Rn.3620	361285	Mllt10
7.80254	8.57372	8.8298	7.88642	8.24933	8.7837	7.85746	8.10882	8.67417	223.254	381.019	455.024	236.619	304.296	440.714	231.916	276.057	408.494	0.506728	0.14071	0.262969	0.245706	0.187278	0.131613	0.143995	0.155704	0.151168	AA956937	1381075_at	Transcribed locus	Rn.32887	-	-
5.17297	5.74068	6.02609	5.11161	5.72305	5.87044	5.00668	5.47192	5.96821	36.0761	53.4708	65.1679	34.5739	52.8214	58.5031	32.1485	44.3825	62.6052	0.186462	0.164066	0.312371	0.141964	0.213645	0.396563	0.274067	0.133152	0.410682	BI289641	1378155_at	BAT2 domain containing 1	Rn.206334	360865	Bat2d1
10.3515	11.502	11.5397	11.4455	11.8863	11.9099	11.0283	11.389	11.4139	1306.51	2900.33	2977.12	2788.94	3785.58	3848.02	2088.57	2681.83	2728.51	0.394892	0.116673	0.161115	0.217687	0.147588	0.146001	0.114916	0.171568	0.264797	NM_134353	1369952_at	Poly(A) binding protein, cytoplasmic 1	Rn.127813	171350	Pabpc1
4.60178	5.36067	5.66945	4.80974	5.34836	5.30272	4.84264	5.4609	5.55731	24.2814	41.0887	50.8949	28.0463	40.7396	39.471	28.6933	44.0448	47.0887	0.193603	0.176485	0.316701	0.080816	0.23297	0.243397	0.181308	0.14217	0.415009	BF393831	1394834_at	WD repeat and FYVE domain containing 3	Rn.57981	305164	Wdfy3
4.87563	5.50879	5.77072	4.86391	5.52056	5.68232	4.82056	5.2921	5.56956	29.3569	45.5314	54.5959	29.1194	45.9044	51.351	28.2575	39.1815	47.4903	0.161919	0.137129	0.247339	0.230283	0.181779	0.30412	0.206453	0.264562	0.248183	BM387790	1385020_at	Hypothetical protein LOC499339	Rn.127943	499339	LOC499339
5.47486	5.58444	6.2523	4.52588	5.15078	5.29997	5.12326	5.90474	6.14627	44.4731	47.9826	76.2307	23.037	35.5254	39.3958	34.8542	59.9106	70.8291	0.202841	0.146246	0.379491	0.121109	0.153401	0.293105	0.179321	0.109018	0.309409	AW527233	1384904_at	Neuropilin (NRP) and tolloid (TLL)-like 2	Rn.147067	307757	Neto2
3.80421	4.2565	4.77544	3.69443	4.35023	4.61993	3.87024	4.17426	4.67914	13.9695	19.1132	27.3874	12.946	20.3962	24.5888	14.6237	18.0542	25.619	0.181079	0.164369	0.283588	0.06831	0.30444	0.4002	0.196755	0.249903	0.414703	BE117471	1378544_at	Retinoblastoma binding protein 6	Rn.95305	308968	Rbbp6
7.1833	7.81729	8.39279	7.76912	7.623	8.49921	7.19023	7.66485	8.15448	145.341	225.548	336.11	218.141	197.13	361.84	146.041	202.932	284.933	0.310052	0.179427	0.314119	0.190196	0.161803	0.375943	0.147227	0.2114	0.390613	BF412512	1383864_at	ESTs	-	-	-
6.4327	7.10558	7.25943	6.5315	7.00956	7.50319	6.32517	6.70428	7.11526	86.3845	137.719	153.217	92.5076	128.851	181.42	80.18	104.277	138.646	0.301387	0.236892	0.32981	0.184626	0.234791	0.28742	0.169979	0.155684	0.413764	BF417645	1382551_at	Intersectin 2	Rn.37673	313934	Itsn2
6.70795	7.37722	7.24666	9.74699	10.9338	10.6211	6.72083	7.13652	7.03935	104.543	166.251	151.867	859.283	1956.15	1574.96	105.48	140.704	131.539	0.175025	0.092014	0.150755	0.115222	0.292537	0.199765	0.16114	0.135487	0.201968	AA924204	1384546_at	Transcribed locus	Rn.23057	-	-
7.10244	7.68143	7.83362	6.99065	7.41154	7.729	6.75865	7.39095	7.75721	137.419	205.277	228.115	127.173	170.253	212.159	108.282	167.841	216.348	0.177923	0.157954	0.253352	0.122547	0.158849	0.255303	0.251059	0.144306	0.267987	AI101392	1386229_at	CBF1 interacting corepressor	Rn.99641	362149	Cir
6.15484	6.59144	6.71237	5.50484	6.34124	6.55886	5.87032	6.13317	6.72784	71.2511	96.432	104.864	45.4069	81.0781	94.2787	58.4982	70.1889	105.994	0.200328	0.131092	0.337674	0.212572	0.199091	0.320821	0.198345	0.11551	0.237942	AI111480	1387309_a_at	Glutamate receptor, ionotropic, kainate 1	Rn.10449	29559	Grik1
5.55484	5.9637	6.42385	4.69315	5.2757	5.55613	5.49742	5.82214	6.47695	47.0082	62.4098	85.8562	25.869	38.7386	47.0502	45.174	56.5769	89.0751	0.258174	0.190856	0.378318	0.312468	0.137018	0.229925	0.155836	0.2344	0.316385	BI289762	1390174_at	Transcribed locus, strongly similar to NP_001020912.1 echinoderm microtubule associated protein like 1 [Rattus norvegicus]	Rn.216583	-	-
8.33764	8.8838	9.35503	9.8058	10.2357	10.518	8.46543	8.87169	9.37982	323.504	472.379	654.854	895.035	1205.74	1466.34	353.467	468.43	666.204	0.317129	0.054592	0.114448	0.111236	0.067669	0.163011	0.067236	0.118445	0.081524	BE108241	1382891_at	Ubiquitin specific peptidase 27, X-linked	Rn.61758	302566	Usp27x
4.46649	5.24256	5.0788	4.29966	4.72005	4.71973	4.24485	5.05525	5.24966	22.1079	37.8589	33.7965	19.6937	26.3558	26.35	18.9595	33.2493	38.0457	0.173727	0.266315	0.225301	0.092399	0.202854	0.304836	0.093066	0.235197	0.428013	BE115743	1397505_at	Transcribed locus, strongly similar to XP_001107915.1 PREDICTED: similar to axonal transport of synaptic vesicles, partial [M	Rn.199110	-	-
5.80809	6.38588	6.46649	5.39223	6.20323	6.09478	5.59836	6.16205	6.40269	56.0285	83.626	88.4316	41.9975	73.6815	68.3458	48.4478	71.6081	84.6061	0.142251	0.159405	0.294084	0.232696	0.237475	0.243002	0.207042	0.256088	0.266872	BF395171	1375739_at	EH-domain containing 4	Rn.7379	192204	Ehd4
8.56044	9.21484	9.18077	9.55131	10.1935	10.3442	8.53012	9.05066	9.39561	377.528	594.215	580.346	750.293	1170.98	1299.91	369.677	530.298	673.535	0.294228	0.127512	0.297325	0.157908	0.187988	0.252903	0.158155	0.14491	0.204184	BF400594	1395836_at	Odz, odd Oz/ten-m homolog 2 (Drosophila)	Rn.205610	117242	Odz2
8.53089	9.16704	9.08015	8.92247	9.61996	9.78721	8.34511	8.90987	9.12108	369.874	574.849	541.25	485.212	786.858	883.576	325.183	480.992	556.825	0.259191	0.114012	0.288482	0.232218	0.266598	0.238259	0.188805	0.184426	0.289519	BG377130	1368841_at	Transcription factor 4	Rn.23354	84382	Tcf4
6.26554	6.87606	7.0142	6.57192	7.07317	7.36386	6.204	6.72694	7.08456	76.9335	117.463	129.266	95.136	134.659	164.719	73.7208	105.928	135.727	0.373227	0.100233	0.237634	0.126895	0.114899	0.312447	0.234749	0.164584	0.139952	BE116021	1392349_at	Solute carrier family 5 (inositol transporters), member 3	Rn.208396	114507	Slc5a3
6.25937	7.01177	6.78103	6.13607	7.02995	6.80032	6.11573	6.83469	6.61485	76.6052	129.049	109.975	70.3301	130.685	111.455	69.3455	114.142	98.0095	0.246056	0.233618	0.285367	0.169271	0.21136	0.239725	0.159064	0.158921	0.340649	BG376780	1391848_at	Transcribed locus, strongly similar to XP_341606.1 PREDICTED: similar to cutaneous T-cell lymphoma tumor antigen se70-2 [Ratt	Rn.218058	-	-
7.59194	7.88351	8.42458	7.75147	8.21771	8.50983	7.48427	8.19347	8.41343	192.931	236.142	343.599	215.489	297.699	364.514	179.056	292.739	340.953	0.233046	0.2575	0.084092	0.175867	0.164722	0.154802	0.177094	0.294424	0.152647	BE104552	1391743_at	ELAV (embryonic lethal, abnormal vision, Drosophila)-like 1 (Hu antigen R)	Rn.216517	363854	Elavl1
4.26948	5.00763	4.8763	3.59162	4.42914	4.28636	3.99228	4.52871	4.64207	19.286	32.1697	29.3706	12.0555	21.5429	19.513	15.9146	23.0822	24.9691	0.084824	0.317019	0.295548	0.12317	0.239091	0.238557	0.132597	0.19228	0.307525	BF411995	1381792_at	Mitochondrial ribosomal protein S15	Rn.12127	298517	Mrps15
8.06802	8.7105	8.73725	8.3534	9.01413	8.97929	7.98913	8.38808	8.99735	268.359	418.911	426.751	327.057	517.039	504.703	254.078	335.015	511.06	0.413837	0.26598	0.204332	0.182562	0.129695	0.206196	0.133979	0.288279	0.228669	NM_022385	1387358_at	ADP-ribosylation factor-like 1	Rn.3065	64187	Arl1
7.01226	8.19391	7.51048	7.25422	8.21788	7.23313	7.04706	7.93539	7.23182	129.092	292.828	182.339	152.664	297.734	150.449	132.244	244.788	150.312	0.376713	0.300774	0.290676	0.222126	0.218221	0.234936	0.299867	0.329306	0.183083	BF546710	1397569_at	Transcribed locus	Rn.45255	-	-
6.88692	7.91836	7.861	7.41515	7.93552	7.93206	7.30092	7.76933	7.70874	118.35	241.916	232.486	170.68	244.81	244.224	157.687	218.173	209.2	0.400377	0.142714	0.128054	0.085871	0.102095	0.082903	0.108167	0.136147	0.040152	BE106717	1380875_at	Transcribed locus	Rn.206678	-	-
6.40795	7.18379	6.98703	6.34199	7.07642	7.09808	6.40788	6.65241	7.287	84.9151	145.391	126.854	81.1202	134.963	137.005	84.911	100.595	156.173	0.327211	0.188951	0.219474	0.209183	0.095062	0.191725	0.146871	0.285648	0.184584	BF523624	1386129_at	Inhibitor of growth family, member 2	Rn.20482	290744	Ing2
6.91172	7.6394	7.69169	7.10602	7.64501	7.74486	6.92422	7.57712	7.62062	120.402	199.383	206.742	137.761	200.16	214.504	121.45	190.959	196.805	0.281154	0.119084	0.175826	0.114772	0.093877	0.159313	0.17946	0.118602	0.029995	AW434946	1390206_at	Transcribed locus	Rn.54341	-	-
8.79519	9.35832	9.53531	9.13498	9.60942	9.85817	8.61861	9.17056	9.54651	444.238	656.349	742.018	562.216	781.131	928.122	393.061	576.254	747.801	0.216574	0.157957	0.181345	0.141629	0.087429	0.266468	0.128749	0.138478	0.127638	AW528857	1395415_at	Transcribed locus	Rn.169568	-	-
7.44408	8.32717	8.29179	7.76268	8.20535	8.29185	7.57176	8.14604	8.25114	174.137	321.165	313.384	217.17	295.159	313.398	190.251	283.271	304.678	0.385249	0.089027	0.131087	0.106701	0.050109	0.145834	0.129437	0.091811	0.161602	U25746	1387912_at	DEAD (Asp-Glu-Ala-Asp) box polypeptide 46	Rn.3436	245957	Ddx46
9.88531	10.7953	10.7922	10.0484	10.5163	10.6123	10.0957	10.5445	10.7322	945.747	1777.09	1773.27	1058.94	1464.61	1565.38	1094.23	1493.52	1701.04	0.433868	0.12943	0.173567	0.135361	0.091535	0.22415	0.146033	0.15161	0.179458	BE109152	1389062_at	IK cytokine	Rn.19642	291659	Ik
5.54814	5.9695	6.30104	5.26696	5.6625	6.41508	5.55104	5.70944	6.44585	46.7904	62.6612	78.8501	38.5046	50.6503	85.3358	46.8845	52.3254	87.1754	0.234275	0.254113	0.422531	0.20186	0.166666	0.401895	0.133812	0.18562	0.418039	BF388857	1385215_at	Runt-related transcription factor 1; translocated to, 1 (cyclin D-related)	Rn.218117	362489	Runx1t1
5.60442	6.42241	6.23411	5.73154	6.57858	6.16189	5.5664	6.14367	6.22445	48.6518	85.7705	75.2756	53.1331	95.5762	71.6001	47.3864	70.7016	74.7732	0.265519	0.078851	0.150678	0.149099	0.111292	0.209485	0.230049	0.16215	0.154332	AI411341	1376971_at	Autophagy-related 10 (S. cerevisiae)	Rn.21798	688555	Atg10
6.40308	6.98714	6.88292	5.93902	6.5308	6.87517	6.09355	6.64446	6.88353	84.629	126.864	118.023	61.3512	92.4627	117.39	68.2875	100.042	118.073	0.353705	0.191844	0.330719	0.120626	0.22109	0.174861	0.173156	0.130895	0.260621	AI045965	1393505_x_at	Family with sequence similarity 63, member B	Rn.15746	363089	Fam63b
9.98592	10.7065	10.9538	9.80879	10.0866	10.4197	10.0815	10.4616	10.9658	1014.05	1671	1983.46	896.892	1087.35	1369.75	1083.51	1410.12	2000.02	0.221544	0.090516	0.168079	0.099077	0.110035	0.239393	0.103495	0.176194	0.248629	BI291391	1375662_at	Transcribed locus, moderately similar to XP_001721967.1 PREDICTED: hypothetical protein [Homo sapiens]	Rn.199192	-	-
5.64824	6.08525	6.38593	5.40172	5.90727	6.19472	5.37343	5.95351	6.23891	50.1522	67.8958	83.6289	42.2746	60.0158	73.2481	41.4537	61.9705	75.5264	0.283102	0.227518	0.262351	0.152872	0.164986	0.262798	0.15004	0.254169	0.300414	BI281965	1397512_at	Similar to Vps41 protein	Rn.6409	306991	RGD1560511
8.85559	9.03439	9.57889	7.88531	8.54658	8.80924	8.63118	9.05905	9.53743	463.232	524.351	764.774	236.437	373.918	448.586	396.501	533.391	743.109	0.305155	0.119868	0.347049	0.222904	0.231801	0.39119	0.155846	0.142908	0.317623	BE115518	1381193_at	Hypothetical LOC317456	Rn.50555	317456	LOC317456
6.73773	7.27971	7.14699	5.89185	6.47007	6.73497	6.33968	6.9948	7.19606	106.723	155.386	141.729	59.3777	88.6513	106.519	80.9905	127.539	146.632	0.262004	0.090738	0.289654	0.198644	0.149837	0.315849	0.187016	0.143291	0.170269	BG375528	1397615_at	ESTs	-	-	-
5.09866	5.63766	5.73193	4.81409	5.50849	5.21168	4.66033	5.20828	5.69458	34.2649	49.7857	53.1475	28.131	45.5219	37.0571	25.2871	36.9699	51.7892	0.217239	0.140962	0.18733	0.180578	0.152186	0.211488	0.272553	0.355958	0.198296	BG376410	1388199_at	Epithelial cell adhesion molecule	Rn.106481	171577	Epcam
6.17951	6.64281	6.88495	5.50587	5.68012	5.89093	5.88077	6.67651	7.05887	72.4799	99.9275	118.189	45.4393	51.2727	59.3399	58.9235	102.289	133.331	0.284423	0.15997	0.286641	0.231158	0.171162	0.361072	0.149615	0.127728	0.235038	AW529817	1395814_at	Transcribed locus	Rn.47307	-	-
8.50772	9.37669	9.20969	8.3642	8.85449	8.95199	8.65161	9.06983	9.44743	363.981	664.76	592.097	329.515	462.879	495.242	402.156	537.392	698.168	0.221385	0.150646	0.229351	0.067479	0.136878	0.3113	0.199387	0.195578	0.262822	BI289174	1379322_at	Proteasome (prosome, macropain) 26S subunit, non-ATPase, 7	Rn.20659	307821	Psmd7
9.34855	10.496	10.5903	9.08445	9.0361	9.37033	9.94649	10.2769	10.4181	651.919	1444.15	1541.69	542.865	524.973	661.836	986.715	1240.67	1368.23	0.232719	0.168546	0.160836	0.170675	0.184614	0.174294	0.27876	0.201874	0.18498	BE116951	1381754_at	Transcribed locus	Rn.199623	-	-
5.73982	6.32705	6.49217	8.53634	8.91774	9.06883	5.85054	6.45283	6.81561	53.439	80.2845	90.0198	371.274	483.623	537.019	57.7016	87.5982	112.643	0.156179	0.301495	0.175125	0.170443	0.19034	0.134863	0.293769	0.142473	0.170892	BF418351	1390327_at	Transcribed locus	Rn.46349	-	-
5.68601	6.18243	6.47516	6.20476	6.43507	6.9881	5.78683	6.35533	6.70454	51.4825	72.6268	88.9646	73.7597	86.5265	126.949	55.2089	81.8738	104.296	0.280531	0.064349	0.187869	0.119014	0.065435	0.168906	0.120792	0.188101	0.135981	AI169278	1372550_at	Karyopherin (importin) beta 1	Rn.11061	24917	Kpnb1
7.55073	7.96686	8.18402	7.03726	7.57319	7.82445	7.21939	7.79713	8.10219	187.498	250.186	290.828	131.349	190.44	226.67	149.023	222.418	274.791	0.218689	0.16114	0.189359	0.142857	0.218257	0.10034	0.194347	0.208115	0.1643	BG380768	1394448_at	Transcribed locus	Rn.40763	-	-
9.54883	10.3259	10.1959	9.60388	10.3347	10.2131	9.65152	10.2101	10.1956	749.004	1283.53	1172.93	778.137	1291.38	1187	804.261	1184.53	1172.69	0.37235	0.152148	0.173538	0.139184	0.119632	0.154862	0.216572	0.169326	0.26524	NM_013181	1386905_at	Protein kinase, cAMP dependent regulatory, type I, alpha	Rn.10990	25725	Prkar1a
7.69384	8.37484	8.72687	7.5172	7.83067	8.1161	7.89972	8.25416	8.67079	207.051	331.954	423.691	183.19	227.649	277.453	238.81	305.316	407.538	0.280091	0.058257	0.117838	0.102174	0.116376	0.174194	0.103224	0.086271	0.084044	BF403349	1374261_at	Transcribed locus	Rn.57606	-	-
8.74364	9.30908	9.3645	8.48885	9.10204	9.15176	8.62839	9.14813	9.49543	428.645	634.326	659.167	359.251	549.525	568.793	395.735	567.364	721.787	0.199444	0.124129	0.183091	0.146212	0.163669	0.240598	0.26035	0.142741	0.241878	AI454911	1379810_at	Small inducible cytokine subfamily E, member 1	Rn.3192	114632	Scye1
10.6428	11.3377	11.3793	10.0498	10.7852	10.822	10.8544	11.2504	11.3497	1598.83	2588.14	2663.86	1059.96	1764.69	1810.28	1851.4	2436.17	2609.76	0.349008	0.084462	0.084814	0.220744	0.182939	0.150498	0.093251	0.11128	0.091604	AA943310	1375056_at	Transcribed locus, strongly similar to NP_081226.1 OCIA domain containing 2 [Mus musculus]	Rn.105660	-	-
2.54872	3.09406	3.46224	2.70895	3.23335	3.30739	2.57335	3.0385	3.34451	5.85115	8.53896	11.0214	6.53846	9.40449	9.89974	5.9519	8.21636	10.1578	0.05407	0.073533	0.259392	0.105019	0.114267	0.319658	0.094653	0.201163	0.214887	BE099884	1382354_at	M-phase phosphoprotein 8	-	-	-
8.44006	9.42839	8.99626	9.7555	10.2852	10.2956	8.56113	9.15914	9.1479	347.305	689.014	510.674	864.367	1247.83	1256.85	377.709	571.71	567.273	0.230989	0.196647	0.308953	0.124277	0.119537	0.361779	0.074477	0.175488	0.241405	BF550844	1377929_at	Transcribed locus	Rn.15929	-	-
6.43369	6.96413	7.52752	6.15406	6.49605	7.12674	6.58514	6.60385	7.21171	86.4438	124.857	184.505	71.2126	90.2622	139.753	96.0118	97.2651	148.232	0.29726	0.242483	0.294852	0.212597	0.244392	0.304367	0.236602	0.19603	0.427358	BF392234	1383829_at	Bobby sox homolog (Drosophila)	Rn.113000	303970	Bbx
6.57093	6.97812	7.09143	5.05537	5.67199	5.8574	6.13324	6.67553	7.02763	95.0708	126.073	136.374	33.252	50.9846	57.9766	70.1923	102.22	130.475	0.166574	0.117729	0.295829	0.171855	0.087092	0.229008	0.188113	0.153092	0.148261	AA859652	1376267_at	Transcribed locus	Rn.54795	-	-
4.34353	4.9826	4.93567	4.14131	4.66863	4.76429	4.24166	4.94398	4.98876	20.3017	31.6164	30.6045	17.6465	25.433	27.1765	18.9176	30.7813	31.7517	0.158844	0.19977	0.179685	0.148463	0.190102	0.250118	0.202924	0.237282	0.254223	BI284181	1380666_at	MON1 homolog b (yeast)	Rn.6337	307868	Mon1b
10.2036	11.0717	11.2232	11.3353	11.5135	11.8312	10.5123	10.7683	11.3219	1179.21	2152.35	2390.67	2583.84	2923.54	3643.73	1460.55	1744.14	2559.95	0.444136	0.047635	0.114104	0.174769	0.112946	0.165727	0.117208	0.155803	0.103712	BI281754	1398990_at	Transcribed locus	Rn.163564	-	-
8.72481	9.46379	9.33985	8.72981	9.33853	9.29371	8.61204	9.26466	9.25147	423.087	706.13	648	424.556	647.407	627.604	391.275	615.093	609.495	0.495673	0.087439	0.185883	0.161456	0.176855	0.120489	0.17284	0.097133	0.154861	H33101	1386478_at	Mitochondrial carrier triple repeat 1	Rn.18405	313241	Mcart1
5.69057	6.27733	6.23327	5.71127	6.28221	6.45402	5.47257	5.94944	6.33972	51.6455	77.5648	75.2318	52.3918	77.8276	87.6705	44.4025	61.7959	80.9927	0.200436	0.254316	0.220063	0.196813	0.142679	0.169257	0.231601	0.182899	0.116824	AI502051	1398726_at	Activating signal cointegrator 1 complex subunit 3-like 1	Rn.76239	296126	Ascc3l1
9.56265	10.1727	10.2565	9.35386	9.9379	9.99607	9.52394	10.0238	10.2771	756.214	1154.22	1223.25	654.323	980.858	1021.21	736.193	1041.03	1240.84	0.375466	0.097699	0.148547	0.192259	0.090386	0.193935	0.111854	0.138464	0.153988	AI411501	1376468_at	Histidyl-tRNA synthetase	Rn.35537	307492	Hars
9.01906	9.61434	9.69706	8.833	9.33921	9.50644	8.98153	9.56751	9.72104	518.809	783.799	830.053	456.035	647.713	727.317	505.487	758.765	843.965	0.284924	0.066812	0.178242	0.14114	0.087121	0.211438	0.119002	0.123412	0.133375	BI285319	1378123_x_at	Transcribed locus	Rn.23192	-	-
9.42126	10.1621	9.89523	9.3459	10.0837	10.0043	9.35732	9.9032	9.97129	685.617	1145.77	952.272	650.723	1085.17	1027.06	655.895	957.547	1003.82	0.359002	0.081587	0.164702	0.157929	0.101848	0.171499	0.146048	0.143297	0.120987	NM_021757	1387823_at	Pleiotropic regulator 1, PRL1 homolog (Arabidopsis)	Rn.44181	60376	Plrg1
9.71935	10.6739	10.5696	9.98218	10.6227	10.433	10.0986	10.4255	10.5555	842.977	1633.67	1519.73	1011.43	1576.71	1382.44	1096.43	1375.27	1504.95	0.453774	0.089732	0.078907	0.072308	0.044865	0.054142	0.104051	0.158477	0.136677	AF329099	1387966_at	Asparaginase like 1	Rn.22774	246307	Asrgl1
9.08076	9.66178	9.84554	9.20358	9.63883	9.95331	9.03796	9.44208	9.82673	541.478	810.001	920.032	589.595	797.218	991.391	525.65	695.584	908.114	0.221504	0.121554	0.152795	0.170899	0.076365	0.247421	0.126482	0.151753	0.182083	AW920193	1383484_at	Male-specific lethal 2-like 1 (Drosophila)	Rn.9626	315959	Msl2l1
3.68633	4.31433	4.11581	3.46832	4.09005	3.99143	3.40105	4.00317	4.32002	12.8735	19.8949	17.3373	11.068	17.0305	15.9052	10.5637	16.0352	19.9736	0.168574	0.223176	0.198724	0.131198	0.210969	0.116377	0.097742	0.122178	0.311372	AA848370	1397525_at	Transcribed locus	Rn.8697	-	-
4.40715	4.78556	5.27951	4.16047	4.59927	4.85657	4.23083	4.59056	5.14571	21.217	27.5802	38.841	17.8824	24.2392	28.9717	18.7762	24.0933	35.4008	0.129392	0.101389	0.237087	0.170949	0.103468	0.252058	0.092377	0.102786	0.224605	BE118701	1380939_at	Transcribed locus	Rn.172802	-	-
9.30068	10.2603	10.1144	9.56622	10.0051	10.0231	9.60672	9.99567	10.2157	630.643	1226.47	1108.51	758.087	1027.63	1040.53	779.67	1020.93	1189.14	0.420957	0.058885	0.137637	0.059566	0.064642	0.089854	0.117289	0.089421	0.05797	BI288244	1374279_at	Small inducible cytokine subfamily E, member 1	Rn.3192	114632	Scye1
6.93906	8.03261	7.59561	7.08463	7.81918	7.57927	7.45018	7.94852	7.54616	122.706	261.852	193.422	135.733	225.844	191.244	174.875	247.026	186.905	0.385928	0.094753	0.075184	0.104456	0.125112	0.095007	0.099669	0.135275	0.170416	AW523504	1376502_at	Similar to putative protein, with at least 9 transmembrane domains, of eukaryotic origin (43.9 kD) (2G415)	Rn.41348	298851	RGD1309228
10.869	11.7105	11.5244	8.88787	9.27376	9.36284	10.8187	11.4826	11.5077	1870.23	3351.29	2945.71	473.713	618.985	658.409	1806.15	2861.59	2911.81	0.269755	0.090716	0.301142	0.066353	0.176751	0.30387	0.13899	0.201289	0.27022	BG379237	1383066_at	ESTs	-	-	-
3.63315	4.41003	4.33485	3.49053	3.94726	4.36603	3.72068	3.96217	4.33074	12.4076	21.2594	20.1799	11.2397	15.4257	20.6208	13.1837	15.5859	20.1225	0.142217	0.235857	0.274814	0.080968	0.153368	0.318799	0.201341	0.181107	0.265639	AW144684	1395379_at	Zinc finger (CCCH type), RNA binding motif and serine/arginine rich 2	Rn.26786	302670	Zrsr2
9.62677	10.2629	10.2218	9.42915	10.167	10.1317	9.54457	10.0579	10.0911	790.581	1228.69	1194.18	689.377	1149.67	1121.88	746.796	1065.93	1090.75	0.16813	0.100699	0.165949	0.227165	0.128665	0.133137	0.25402	0.182756	0.213657	BM389678	1376116_at	DEAD (Asp-Glu-Ala-Asp) box polypeptide 24	Rn.100166	373065	Ddx24
5.06011	5.47178	5.71107	4.8114	5.15231	5.63771	4.68369	4.98223	5.7353	33.3614	44.3782	52.3846	28.0786	35.5631	49.7874	25.6999	31.6083	53.2718	0.212607	0.227779	0.270679	0.186697	0.188399	0.282272	0.132632	0.276647	0.234954	H31553	1395871_at	Similar to topoisomerase (DNA) II beta	Rn.104585	361100	LOC361100
7.20871	8.32783	7.90518	7.48675	8.01398	7.80037	7.46363	7.91651	7.9425	147.924	321.312	239.716	179.364	258.493	222.918	176.513	241.606	245.998	0.434048	0.201484	0.113504	0.105245	0.092064	0.186869	0.172131	0.246986	0.192031	BE106064	1393604_at	GPN-loop GTPase 3	Rn.162125	360810	Gpn3
8.30674	9.10936	9.00443	8.54312	9.16722	8.98626	8.34948	8.93044	8.9055	316.649	552.32	513.575	373.023	574.921	507.147	326.17	487.899	479.538	0.225785	0.201116	0.195401	0.191976	0.163933	0.140132	0.2276	0.21264	0.171079	H32531	1384149_at	Coiled-coil domain containing 75	Rn.57800	362685	Ccdc75
8.53958	9.2529	9.08338	8.23993	9.09409	8.9363	8.6092	9.07265	9.01771	372.109	610.099	542.463	302.319	546.505	489.885	390.506	538.443	518.324	0.083141	0.073569	0.092752	0.08753	0.062861	0.090622	0.09121	0.096963	0.168313	BG377235	1389764_at	DNA methyltransferase 1-associated protein 1	Rn.22845	298447	Dmap1
8.92919	9.59152	9.49043	8.65873	9.52065	9.11971	8.95688	9.64115	9.41014	487.477	771.499	719.29	404.145	734.516	556.296	496.924	798.501	680.353	0.131994	0.182792	0.07806	0.19366	0.158213	0.07112	0.201627	0.17122	0.145668	AA944790	1373671_at	Similar to CG14483-PA	Rn.83	688786	LOC688786
6.82519	7.3843	7.4675	7.50593	8.08554	8.00119	6.65848	7.30563	7.42371	113.393	167.069	176.987	181.765	271.638	256.211	101.019	158.203	171.696	0.336031	0.106149	0.282767	0.288023	0.173558	0.216034	0.174259	0.142299	0.155709	BI303342	1376198_at	Adipocyte-specific adhesion molecule	Rn.163013	286939	Asam
9.48723	10.4752	10.1665	9.60658	10.214	9.86225	9.666	10.215	10.1835	717.696	1423.47	1149.27	779.594	1187.74	930.75	812.374	1188.56	1162.89	0.36591	0.105021	0.134202	0.060677	0.083045	0.124179	0.169081	0.128623	0.130505	NM_031331	1386930_at	Proteasome (prosome, macropain) 26S subunit, non-ATPase, 4	Rn.3830	83499	Psmd4
5.96941	6.58469	6.84178	5.40605	5.8737	5.94529	5.92545	6.35148	6.63976	62.6573	95.9819	114.705	42.4017	58.6354	61.6184	60.7769	81.6556	99.7165	0.119912	0.140267	0.140684	0.07439	0.134084	0.160498	0.128346	0.132851	0.181708	BF389592	1397880_at	Similar to lysophosphatidylglycerol acyltransferase 1	Rn.101953	679692	LOC679692
7.54979	8.27177	8.23403	7.68787	8.32957	8.26128	7.66062	8.21273	8.15776	187.376	309.066	301.086	206.196	321.7	306.827	202.338	296.673	285.582	0.168426	0.0838	0.042365	0.052865	0.061088	0.081119	0.081414	0.127625	0.06888	BM391624	1383271_at	Coiled-coil domain containing 59	Rn.30179	314799	Ccdc59
5.28751	5.66409	5.78142	5.46733	6.19951	6.08042	4.82254	5.42837	5.64037	39.057	50.7062	55.0023	44.2415	73.4917	67.6689	28.2963	43.0628	49.8793	0.108411	0.192967	0.207606	0.193196	0.181688	0.277638	0.191104	0.254908	0.175581	BE114011	1395998_at	Nucleolar protein 5A	Rn.145204	362214	Nol5a
4.6171	4.9939	5.49615	4.99559	5.2349	5.58313	4.62579	5.21642	5.51638	24.5406	31.865	45.1342	31.9023	37.6584	47.9391	24.6889	37.1791	45.7716	0.217512	0.135758	0.28397	0.071382	0.177667	0.338298	0.143153	0.061834	0.318776	BF402788	1393733_at	Phosphatidic acid phosphatase type 2	Rn.151385	310812	Pap2d
7.14491	7.6458	7.44984	6.1884	6.79026	6.65274	6.72548	7.58347	7.58361	141.525	200.27	174.834	72.928	110.681	100.618	105.821	191.801	191.82	0.167145	0.101773	0.226229	0.171282	0.040667	0.208645	0.25554	0.102256	0.143416	AI229090	1382696_at	Down syndrome cell adhesion molecule	Rn.24399	171119	Dscam
5.41304	5.8946	6.41651	4.90005	4.75484	5.4252	5.2562	5.68792	6.31247	42.6076	59.491	85.4205	29.8581	26.9991	42.9683	38.2185	51.5507	79.4772	0.198998	0.217338	0.363084	0.17838	0.23866	0.401833	0.247156	0.161021	0.350773	AA926072	1391757_at	Transcribed locus	Rn.25328	-	-
9.09165	9.90393	9.67988	9.37257	10.0411	9.8146	9.17376	9.77891	9.69876	545.581	958.032	820.227	662.864	1053.59	900.511	577.533	878.507	831.032	0.261248	0.097283	0.15308	0.124303	0.113154	0.100498	0.101661	0.106092	0.115956	NM_024363	1386897_at	Protein arginine methyltransferase 1	Rn.5870	60421	Prmt1
9.25345	9.99657	9.84574	9.94329	10.5161	10.4095	9.07303	9.72887	9.683	610.332	1021.57	920.159	984.529	1464.41	1360.1	538.585	848.558	822.003	0.357298	0.119614	0.185518	0.117698	0.147953	0.142233	0.153606	0.111828	0.127114	BG670916	1375278_at	Tripartite motif protein 2	Rn.16973	361970	Trim2
7.4705	7.97095	8.38936	7.87027	8.10466	8.53992	7.45985	7.67979	8.39127	177.355	250.897	335.312	233.985	275.262	372.196	176.051	205.044	335.756	0.489355	0.101304	0.281556	0.240655	0.186061	0.167048	0.251214	0.094466	0.174923	AW531880	1383010_at	Transcribed locus	Rn.203400	-	-
9.29998	10.0621	9.97526	9.49972	9.92163	10.2411	9.46752	9.81848	10.1041	630.337	1069.04	1006.59	723.937	969.858	1210.26	707.958	902.936	1100.62	0.167358	0.090033	0.122722	0.11345	0.08048	0.136612	0.071261	0.092882	0.081683	AI101886	1375019_at	Heterogeneous nuclear ribonucleoprotein H3 (2H9)	Rn.60652	361838	Hnrnph3
6.94769	7.49563	7.66302	7.02722	7.44698	7.66416	6.9881	7.63179	7.6432	123.442	180.472	202.674	130.438	174.488	202.835	126.949	198.334	199.909	0.26377	0.095641	0.237302	0.141505	0.163021	0.163505	0.145816	0.092985	0.137112	BM383359	1381871_at	Transcribed locus	Rn.201838	-	-
5.53236	6.1656	6.43386	4.39686	4.55223	5.1237	5.76697	6.05199	6.55199	46.2814	71.7845	86.454	21.0662	23.4616	34.8648	54.4541	66.3484	93.8308	0.158576	0.220988	0.295314	0.2388	0.130308	0.311157	0.268656	0.25769	0.340214	NM_012788	1368944_at	Discs, large homolog 1 (Drosophila)	Rn.89331	25252	Dlg1
9.97804	10.7833	10.7718	10.4809	10.9456	10.8327	10.1698	10.6612	10.8301	1008.53	1762.37	1748.38	1429.11	1972.21	1823.76	1151.9	1619.35	1820.48	0.393237	0.130135	0.070787	0.064568	0.065789	0.092414	0.176938	0.109505	0.063616	NM_022395	1387781_at	Peptidase (mitochondrial processing) beta	Rn.841	64198	Pmpcb
5.82084	6.32592	6.39692	5.55679	6.35898	6.18691	5.71076	5.83931	6.57698	56.5259	80.2217	84.2684	47.0718	82.0812	72.8527	52.3733	57.2542	95.4703	0.178011	0.082531	0.267323	0.124042	0.18814	0.232803	0.241267	0.230365	0.291495	BM387763	1381119_at	Tetratricopeptide repeat domain 1	Rn.81253	287208	Ttc1
2.67759	2.65498	3.40276	2.58941	3.06105	3.65214	2.3334	2.80671	3.00906	6.39786	6.29838	10.5763	6.01853	8.3458	12.572	5.03992	6.99687	8.0504	0.273055	0.122365	0.289409	0.26998	0.277706	0.365376	0.056199	0.278202	0.298524	AW530195	1396820_at	Histone deacetylase 1	Rn.1863	297893	Hdac1
6.82605	7.41298	7.56757	6.40714	6.86215	7.06941	6.76009	7.09104	7.53654	113.461	170.423	189.699	84.8675	116.336	134.309	108.39	136.338	185.663	0.174596	0.184784	0.351838	0.17271	0.190381	0.29704	0.190714	0.193685	0.308531	BG669441	1383293_at	Transcribed locus	Rn.171547	-	-
4.38628	4.88619	5.27053	4.54002	4.78031	5.02769	4.40622	5.09303	5.11592	20.9123	29.5726	38.6	23.2639	27.48	32.6201	21.2033	34.1315	34.6773	0.249343	0.191386	0.114341	0.21238	0.114624	0.130096	0.226119	0.25245	0.068824	BE109736	1383211_at	ESTs	-	-	-
7.25952	7.80345	7.58111	6.201	7.01954	6.79679	6.93867	7.68413	7.44759	153.226	223.395	191.488	73.5677	129.745	111.183	122.673	205.662	174.561	0.103546	0.133561	0.145221	0.162253	0.092774	0.047561	0.171078	0.194938	0.123683	U29701	1369799_at	4-aminobutyrate aminotransferase	Rn.10090	81632	Abat
4.1581	4.70813	4.89614	3.81992	4.28721	4.48754	3.97362	4.45711	4.62812	17.8531	26.139	29.7773	14.1225	19.5244	22.4328	15.7101	21.9646	24.7288	0.102725	0.100131	0.171782	0.087802	0.079645	0.179958	0.180051	0.177226	0.104606	AB007688	1368319_a_at	Homer homolog 1 (Drosophila)	Rn.37500	29546	Homer1
8.88287	9.51629	9.59862	8.95489	9.45966	9.53279	8.90498	9.43453	9.50173	472.074	732.299	775.305	496.239	704.111	740.723	479.365	691.953	724.946	0.179369	0.117601	0.228396	0.19132	0.17094	0.287564	0.147173	0.073343	0.299048	BF388771	1393813_at	Transcribed locus, strongly similar to NP_001101785.1 tetratricopeptide repeat domain 3 [Rattus norvegicus]	Rn.216436	-	-
10.6463	11.3184	11.2584	11.0549	11.4489	11.6495	10.569	11.1259	11.2845	1602.71	2553.75	2449.72	2127.44	2795.52	3212.54	1519.1	2234.75	2494.44	0.361405	0.045991	0.170771	0.189431	0.08189	0.201364	0.196707	0.10937	0.114046	AW531892	1377347_at	Forkhead box J3	Rn.202994	313554	Foxj3
3.74456	3.98091	4.46809	3.47028	3.88314	4.28075	3.49252	3.93467	4.32813	13.4037	15.7897	22.1324	11.083	14.7551	19.4372	11.2552	15.2916	20.0862	0.125658	0.19059	0.278432	0.163396	0.14755	0.290182	0.063124	0.117679	0.278825	BF397657	1376358_at	Transcribed locus	Rn.62402	-	-
6.61419	7.26119	7.37075	6.50103	6.99918	7.16904	6.6511	7.00906	7.2439	97.9647	153.404	165.507	90.5743	127.927	143.912	100.503	128.806	151.576	0.221587	0.059797	0.118071	0.135438	0.070102	0.240129	0.140559	0.112311	0.087945	AI228340	1390928_at	Transcribed locus, strongly similar to NP_001074614.1 tigger transposable element derived 2 homolog [Mus musculus]	Rn.18093	-	-
7.14481	7.49624	7.83726	6.9615	7.23946	7.53863	6.86951	7.30632	7.93588	141.515	180.548	228.692	124.629	151.11	185.932	116.931	158.278	244.871	0.197373	0.173198	0.188912	0.10338	0.206384	0.216435	0.152951	0.110617	0.231426	BF407231	1382466_at	Similar to RIKEN cDNA 6530403A03	Rn.39699	291060	RGD1309020
8.40119	8.9614	8.81653	7.78521	8.3274	8.37813	8.01248	8.74886	8.69084	338.073	498.483	450.858	220.588	321.216	332.712	258.224	430.199	413.241	0.216114	0.073575	0.238515	0.278894	0.182418	0.190712	0.186402	0.202601	0.150958	AW521619	1381605_at	Ubiquitin specific protease 13 (isopeptidase T-3)	Rn.16802	310306	Usp13
7.95278	8.20527	8.5565	7.71264	8.12614	8.5414	7.67368	7.94092	8.6852	247.757	295.143	376.498	209.766	279.391	372.578	204.177	245.728	411.629	0.327364	0.136648	0.22358	0.246092	0.174373	0.372461	0.257689	0.093226	0.229601	AI547895	1384915_at	Intraflagellar transport 88 homolog (Chlamydomonas)	Rn.132110	305918	Ift88
5.1308	6.12554	5.80198	5.30383	5.74863	5.52462	5.20642	5.89757	5.58595	35.0368	69.8186	55.7918	39.5013	53.7663	46.0337	36.9223	59.6136	48.0329	0.394792	0.179863	0.205348	0.166138	0.236986	0.133528	0.149286	0.194991	0.210573	BM392321	1376692_at	Homeodomain interacting protein kinase 2	Rn.8042	362342	Hipk2
10.2375	10.8065	10.7113	9.74368	10.4196	10.4697	10.1545	10.6653	10.7103	1207.24	1790.94	1676.57	857.314	1369.66	1418.06	1139.75	1623.96	1675.41	0.314546	0.091862	0.221554	0.195594	0.120251	0.159471	0.197177	0.143745	0.151127	AA942681	1379730_at	ATPase, H+ transporting, lysosomal V1 subunit H	Rn.21454	297797	Atp6v1h
9.31124	9.92302	9.92687	9.00278	9.53262	9.70583	9.28602	9.76821	9.85849	635.276	970.793	973.387	512.988	740.636	835.114	624.267	872.016	928.327	0.103097	0.040263	0.066967	0.075301	0.086259	0.103245	0.136082	0.064027	0.072814	BI296999	1392454_at	Zinc finger, HIT type 6	Rn.162633	292160	Znhit6
8.45966	9.29115	9.21641	8.35286	8.65849	8.85798	8.67789	9.1271	9.27681	352.056	626.491	594.862	326.935	404.078	464	409.548	559.153	620.295	0.481893	0.049527	0.103358	0.084571	0.077054	0.065813	0.106994	0.089291	0.078485	AA997679	1390827_at	Transcribed locus	Rn.203196	-	-
5.79065	6.17175	6.18517	5.20268	5.52742	5.95301	5.43488	6.12827	6.30858	55.3553	72.0911	72.7649	36.8267	46.1232	61.949	43.2575	69.9509	79.2632	0.160675	0.124861	0.216764	0.087541	0.246591	0.175516	0.180082	0.186036	0.216808	BF413362	1394539_at	Transcribed locus	Rn.211448	-	-
4.25955	4.26053	5.0347	4.09402	4.15601	5.25634	4.02354	4.03634	5.02088	19.1537	19.1667	32.779	17.0774	17.8272	38.2222	16.2632	16.4081	32.4665	0.280109	0.267164	0.415033	0.083652	0.227007	0.605175	0.180835	0.120199	0.450625	BF398127	1394814_at	Translocated promoter region	Rn.58980	304862	Tpr
7.57214	8.579	8.12219	7.86106	8.37433	8.22513	7.73691	8.34371	8.09779	190.301	382.416	278.627	232.496	331.837	299.234	213.325	324.868	273.954	0.12367	0.097565	0.090201	0.114856	0.123439	0.126549	0.205061	0.153179	0.148454	BI289414	1374983_at	Transcribed locus, strongly similar to NP_663580.1 kelch domain containing 4 [Mus musculus]	Rn.41312	-	-
7.53932	8.34823	8.15428	7.63612	8.20264	8.14848	7.68194	8.23838	8.09575	186.021	325.887	284.894	198.93	294.605	283.751	205.35	301.995	273.567	0.383684	0.053364	0.159042	0.146096	0.073204	0.171269	0.173829	0.076907	0.150381	BI290791	1368032_at	Nucleolar and coiled-body phosphoprotein 1	Rn.9517	64896	Nolc1
8.4602	9.08038	9.04131	8.42461	9.16113	9.08922	8.56781	9.01755	8.99006	352.188	541.336	526.872	343.606	572.499	544.663	379.462	518.266	508.485	0.274519	0.12006	0.087459	0.188149	0.136179	0.144002	0.195757	0.175349	0.115187	AI145556	1371681_at	TOX high mobility group box family member 4	Rn.22195	286990	Tox4
10.6763	11.2565	11.3799	10.9533	11.4921	11.5443	10.676	11.1012	11.3214	1636.39	2446.49	2664.96	1982.77	2880.49	2986.62	1636.05	2196.82	2559.06	0.242216	0.078194	0.180711	0.120515	0.134789	0.236163	0.137672	0.112566	0.202139	AW920881	1398626_s_at	ARP2 actin-related protein 2 homolog (yeast)	Rn.102249	289820	Actr2
4.77981	5.42339	5.32866	4.66466	4.91495	5.18834	4.58238	5.09843	5.51321	27.4705	42.9144	40.1871	25.3631	30.1681	36.4625	23.9571	34.2594	45.6711	0.203396	0.258142	0.253334	0.099912	0.111291	0.284393	0.099095	0.189424	0.290556	BF410192	1375826_at	G protein-coupled receptor 61	Rn.49317	310780	Gpr61
7.83591	8.77094	8.47986	8.52289	9.04951	8.95752	8.19081	8.68571	8.58111	228.478	436.834	357.02	367.829	529.876	497.144	292.2	411.774	382.976	0.378499	0.10927	0.122811	0.139489	0.058597	0.179127	0.089304	0.122751	0.145403	AI177503	1398849_at	H3 histone, family 3B	Rn.29857	117056	H3f3b
6.54723	6.90839	7.26997	6.83055	7.22456	7.45867	6.46935	7.16262	7.12108	93.5217	120.125	154.34	113.815	149.558	175.907	88.6071	143.273	139.206	0.167956	0.110378	0.263138	0.096269	0.230911	0.289318	0.091338	0.155137	0.358665	AA818641	1384376_at	Transcribed locus, strongly similar to NP_001026893.1 DnaJ (Hsp40) homolog, subfamily B, member 14 isoform 1 [Homo sapiens]	Rn.25329	-	-
6.21479	6.51699	6.97136	5.95149	6.36293	6.78711	5.83766	6.08656	6.65029	74.2742	91.5819	125.484	61.8838	82.3062	110.439	57.1888	67.9575	100.447	0.254096	0.219034	0.173823	0.222335	0.180061	0.309287	0.183911	0.248547	0.316922	BI277540	1390941_at	Retinoblastoma binding protein 6	Rn.95305	308968	Rbbp6
3.27949	3.97852	4.29564	3.63589	3.67542	3.88488	3.36121	3.62387	4.30034	9.71013	15.7635	19.6389	12.4312	12.7765	14.7729	10.276	12.328	19.703	0.108328	0.436997	0.216518	0.162193	0.127722	0.197273	0.097418	0.274251	0.315237	BF415556	1395436_at	Transcribed locus	Rn.206726	-	-
10.2429	10.5408	10.8143	10.1888	10.4894	11.1384	10.0255	10.3337	10.9206	1211.77	1489.69	1800.65	1167.17	1437.55	2254.2	1042.26	1290.49	1938.33	0.259091	0.105152	0.244616	0.25632	0.111261	0.332319	0.162	0.075854	0.183465	AI176155	1393218_at	Similar to 2410024A21Rik protein	Rn.20310	314415	RGD1304878
4.40746	5.06478	5.10932	4.06264	4.75692	4.76907	4.62749	5.00833	4.91405	21.2216	33.4696	34.519	16.71	27.0381	27.2667	24.718	32.1853	30.1492	0.240428	0.202992	0.069728	0.077925	0.153845	0.132359	0.082596	0.085473	0.127135	AI071547	1378972_at	WW and C2 domain containing 1	Rn.101912	303039	Wwc1
5.60949	6.10962	6.04062	5.04034	5.86246	5.29952	5.01196	5.67677	5.74447	48.823	69.0524	65.8276	32.9074	58.1803	39.3835	32.2664	51.1538	53.6115	0.199501	0.138238	0.170307	0.218062	0.171478	0.198513	0.178482	0.263022	0.205321	AI231225	1390351_at	Transcribed locus	Rn.81527	-	-
6.46716	7.24707	6.85883	5.83579	6.37782	6.3511	6.40428	7.18659	6.82417	88.4727	151.91	116.068	57.1147	83.1601	81.6341	84.6994	145.673	113.313	0.298343	0.153738	0.082166	0.10464	0.162165	0.124806	0.152297	0.071563	0.059509	BF415982	1395934_at	similar to coiled-coil domain containing 9	-	-	-
6.43926	7.10265	7.14047	6.03477	6.47111	6.54292	6.58127	7.10782	7.20986	86.7782	137.439	141.09	65.5612	88.7152	93.2428	95.7546	137.933	148.042	0.392605	0.175369	0.079859	0.152885	0.166605	0.1174	0.106052	0.15026	0.147216	BI303187	1385292_at	Synaptonemal complex protein SC65	Rn.90100	59101	Sc65
3.70671	4.09141	4.37471	3.73431	4.20272	4.57915	3.489	3.9639	4.07934	13.0566	17.0466	20.7453	13.3088	18.4139	23.9035	11.2278	15.6046	16.9046	0.141663	0.209436	0.220313	0.145118	0.306274	0.320834	0.145733	0.061228	0.289809	BI296291	1377188_at	Transcribed locus	Rn.147846	-	-
9.06766	9.52026	9.91235	9.42812	9.65279	10.0454	9.02896	9.33278	9.92937	536.584	734.317	963.64	688.885	804.969	1056.74	522.382	644.832	975.075	0.405555	0.09435	0.218929	0.188597	0.13348	0.245296	0.102628	0.115378	0.153984	BI294768	1375429_at	ZH16 protein	Rn.199101	100190937	Zh16
7.44692	8.11332	8.08534	7.7	8.30592	8.3864	7.4441	7.72046	8.00161	174.48	276.919	271.6	207.937	316.469	334.625	174.14	210.907	256.286	0.276583	0.179409	0.201951	0.170055	0.093765	0.178103	0.143901	0.223053	0.187255	AB002406	1370386_at	RuvB-like 1 (E. coli)	Rn.86410	65137	Ruvbl1
7.91646	8.56185	8.95901	8.33735	8.65287	8.98684	8.55509	8.63837	9.10119	241.597	377.897	497.658	323.439	402.507	507.351	376.131	398.482	549.201	0.23081	0.046292	0.175345	0.081498	0.050663	0.215884	0.218451	0.159898	0.206281	AI180187	1372000_at	Neuroepithelial cell transforming 1	Rn.3889	307098	Net1
6.27198	7.0764	6.994	6.47991	7.14252	6.86825	6.56588	6.89577	7.0583	77.2777	134.961	127.469	89.258	141.29	116.829	94.7386	119.079	133.278	0.264845	0.14175	0.071732	0.109691	0.107043	0.197437	0.120495	0.200846	0.084028	BG377118	1393946_at	FUS interacting protein (serine-arginine rich) 1	Rn.162118	362630	Fusip1
6.02942	6.67355	6.46915	5.95155	6.58959	6.46603	5.83617	6.34657	6.53445	65.3185	102.08	88.5948	61.8864	96.3084	88.4034	57.1297	81.3782	92.697	0.105161	0.085792	0.180771	0.109214	0.064751	0.167357	0.202139	0.145832	0.149367	NM_017213	1368466_a_at	Outer dense fiber of sperm tails 2	Rn.91211	29479	Odf2
3.79875	4.41525	4.17316	3.42348	4.08644	4.06759	3.62391	4.24773	4.14125	13.9167	21.3365	18.0404	10.7293	16.988	16.7674	12.3284	18.9974	17.6458	0.18203	0.165993	0.243724	0.124854	0.141654	0.208884	0.116027	0.281403	0.234468	AA819053	1392582_at	Transcribed locus	Rn.24122	-	-
9.01736	9.32898	9.32331	8.44884	9.05991	9.24104	8.54051	9.06801	9.36205	518.198	643.136	640.613	349.425	533.709	605.104	372.349	536.714	658.048	0.315423	0.081686	0.140456	0.127099	0.073187	0.195337	0.086791	0.148336	0.149103	AW522495	1372560_at	Transcribed locus	Rn.27177	-	-
5.33465	6.08398	6.06386	5.49141	6.01121	5.99273	5.57747	6.08766	5.99105	40.3543	67.836	66.8966	44.9862	64.4992	63.6783	47.7514	68.0093	63.6042	0.292218	0.072339	0.200105	0.095621	0.171631	0.247217	0.202017	0.140898	0.30387	BI283106	1375769_at	Tripartite motif-containing 41	Rn.79871	303088	Trim41
9.79953	10.499	10.5305	10.7647	11.1686	11.2621	9.93759	10.3389	10.6182	891.153	1447.15	1479.1	1739.79	2301.88	2456.01	980.647	1295.15	1571.8	0.363096	0.128807	0.19029	0.167811	0.151199	0.241136	0.172027	0.155537	0.170811	BI299261	1372874_at	Transcribed locus	Rn.64427	-	-
8.09281	8.47164	8.4965	7.56503	8.23852	8.40442	7.89111	8.36718	8.51348	273.01	354.991	361.161	189.366	302.024	338.831	237.389	330.196	365.437	0.182196	0.053859	0.102518	0.136812	0.099265	0.037535	0.206896	0.1164	0.147275	BF551251	1399139_at	similar to hypothetical protein FLJ11305	-	-	-
9.5274	10.1498	10.1225	9.52676	10.186	10.1469	9.52625	9.9082	10.08	737.961	1136.04	1114.75	737.633	1164.91	1133.76	737.373	960.872	1082.39	0.254671	0.124299	0.13268	0.158825	0.158057	0.137261	0.152657	0.174829	0.115327	AI412236	1388378_at	Eukaryotic translation initiation factor 3, subunit C	Rn.4207	293484	Eif3c
7.99436	9.06675	8.46014	8.2128	8.80338	8.54101	8.27023	8.87602	8.49345	255.001	536.246	352.173	296.687	446.767	372.478	308.736	469.838	360.399	0.179118	0.046368	0.1229	0.101982	0.05692	0.056131	0.134841	0.089135	0.065404	BM384112	1370914_at	Deoxynucleotidyltransferase, terminal, interacting protein 1	Rn.82702	171437	Dnttip1
6.65954	7.81094	7.27042	7.05182	7.55489	7.33027	7.13539	7.62148	7.33723	101.093	224.557	154.388	132.681	188.039	160.928	140.594	196.922	161.706	0.298925	0.064286	0.147618	0.077458	0.077812	0.062875	0.076417	0.106782	0.073962	BM384112	1370915_s_at	Deoxynucleotidyltransferase, terminal, interacting protein 1	Rn.82702	171437	Dnttip1
8.45071	9.40754	9.02315	8.76859	9.32399	9.24922	8.7009	9.17454	9.01716	349.878	679.128	520.282	436.123	640.915	608.545	416.133	577.846	518.126	0.382328	0.070575	0.12196	0.13549	0.08673	0.1074	0.162481	0.068521	0.137718	NM_133548	1368026_at	Hepatoma-derived growth factor, related protein 2	Rn.29462	171073	Hdgfrp2
7.76959	7.97224	8.16123	8.88045	9.66694	9.75003	7.44127	7.93466	8.02937	218.213	251.121	286.269	471.283	812.903	861.096	173.798	244.664	261.265	0.21338	0.053845	0.200911	0.187416	0.154109	0.280716	0.176622	0.120655	0.197075	BG376217	1371013_at	Transcribed locus, strongly similar to NP_113796.1 glutamate receptor, ionotropic, AMPA 1 [Rattus norvegicus]	Rn.216781	-	-
7.36602	8.28453	7.9227	7.53402	8.20102	7.86408	7.60798	8.21122	7.87093	164.965	311.811	242.644	185.339	294.275	232.983	195.088	296.363	234.092	0.096041	0.079001	0.102726	0.062806	0.081582	0.115167	0.129957	0.090317	0.132357	AF235993	1369122_at	Bcl2-associated X protein	Rn.10668	24887	Bax
6.15038	6.92374	6.99653	6.34557	6.72311	7.01551	6.40832	6.64435	6.83603	71.0312	121.41	127.693	81.3218	105.647	129.384	84.9369	100.034	114.248	0.23907	0.129552	0.100206	0.1121	0.058532	0.117289	0.118654	0.083351	0.127447	BM391843	1372204_at	ELK4, member of ETS oncogene family	Rn.204345	304786	Elk4
7.21207	7.73002	7.47457	6.86882	7.71282	7.37387	7.09035	7.92412	7.45811	148.269	212.309	177.857	116.875	209.793	165.865	136.272	242.883	175.839	0.332613	0.096776	0.162092	0.158553	0.200786	0.121395	0.177519	0.158679	0.278137	BE108582	1398707_at	Transcribed locus	Rn.49945	-	-
10.464	11.0858	10.8219	9.64724	10.3854	10.1669	10.2572	10.9079	10.7673	1412.47	2173.49	1810.16	801.879	1337.57	1149.59	1223.84	1921.34	1742.93	0.152635	0.107824	0.128428	0.156325	0.12327	0.082241	0.189996	0.161169	0.137906	BI298757	1373756_at	Cell cycle exit and neuronal differentiation 1	Rn.64460	361675	Cend1
8.32359	9.09963	8.94343	8.74674	9.1166	9.17966	8.35048	8.95125	8.93804	320.369	548.607	492.312	429.567	555.099	579.9	326.396	494.988	490.476	0.370411	0.066485	0.058941	0.069795	0.070232	0.05633	0.14245	0.106324	0.030166	BE329196	1389158_at	Transcribed locus	Rn.204649	-	-
6.06225	6.51704	7.00774	5.91771	6.09572	6.50546	6.22538	6.50832	7.041	66.8219	91.585	128.689	60.4517	68.3903	90.8529	74.8214	91.0331	131.69	0.390619	0.173025	0.210772	0.153557	0.186614	0.198585	0.143046	0.185011	0.244468	BE116152	1388108_at	ELOVL family member 6, elongation of long chain fatty acids (yeast)	Rn.46942	171402	Elovl6
5.95239	6.48795	6.6171	6.52611	7.15635	7.10659	5.96095	6.28305	6.60554	61.9224	89.7568	98.1625	92.1626	142.651	137.815	62.2909	77.8729	97.3791	0.213167	0.096338	0.237736	0.184876	0.213918	0.268296	0.18248	0.209618	0.219944	BI303268	1370258_at	Basic leucine zipper and W2 domains 2	Rn.13196	171439	Bzw2
5.78703	5.9196	6.50109	5.71516	5.89349	6.50576	5.57992	5.90013	6.60897	55.2166	60.5309	90.5781	52.5333	59.4453	90.8718	47.8325	59.7195	97.6109	0.201588	0.096109	0.439938	0.081776	0.1567	0.359929	0.176077	0.272341	0.363792	BF398685	1379952_at	Transcribed locus	Rn.130885	-	-
9.3686	10.1653	9.94759	9.4275	9.88022	9.9494	9.45907	9.9342	10.0064	661.043	1148.31	987.468	688.589	942.416	988.708	703.824	978.345	1028.55	0.242589	0.101899	0.109901	0.087941	0.085715	0.076255	0.123777	0.102504	0.083811	AI599711	1371617_at	Proteasome (prosome, macropain) 26S subunit, non-ATPase, 13	Rn.16918	365388	Psmd13
10.4973	10.8249	10.5349	9.25465	10.1531	9.96906	9.9296	10.6299	10.4898	1445.45	1813.93	1483.61	610.84	1138.64	1002.27	975.231	1584.6	1437.95	0.183778	0.142869	0.218882	0.184507	0.085134	0.260269	0.188251	0.173849	0.193609	NM_021655	1387235_at	Chromogranin A	Rn.41024	24258	Chga
5.72085	6.21598	6.03821	5.50426	6.27927	6.1853	5.57004	6.153	6.07287	52.7409	74.3355	65.7177	45.3887	77.6692	72.7714	47.5061	71.1603	67.3156	0.188344	0.122135	0.164353	0.077458	0.121697	0.119251	0.129765	0.134088	0.175003	AI169082	1373973_at	SAP30 binding protein	Rn.198907	360662	Sap30bp
10.2519	10.8302	10.7843	10.0209	10.4578	10.6148	10.1194	10.6804	10.8037	1219.35	1820.6	1763.59	1038.94	1406.41	1568.1	1112.35	1641.05	1787.47	0.199334	0.054553	0.157383	0.141284	0.087228	0.204129	0.1196	0.117048	0.119042	BI285319	1378122_a_at	Transcribed locus	Rn.23192	-	-
5.99277	6.49536	6.52851	5.44088	6.00067	6.4041	5.94757	6.13281	6.49022	63.6801	90.219	92.3161	43.4378	64.0297	84.6888	61.7159	70.1713	89.8982	0.116756	0.175892	0.282767	0.226632	0.11202	0.266651	0.131199	0.215301	0.199822	BI274777	1395226_at	Aftiphilin	Rn.105388	305544	Aftph
11.3318	12.0051	11.9585	10.8899	11.3406	11.4604	11.372	11.7856	12.0086	2577.58	4110.51	3979.85	1897.52	2593.35	2817.89	2650.41	3530.36	4120.49	0.298423	0.097119	0.128285	0.145125	0.085771	0.168084	0.165836	0.0783	0.106307	NM_024137	1368546_at	Human immunodeficiency virus type I enhancer binding protein 2	Rn.9802	29721	Hivep2
9.88324	10.5219	10.4691	10.0049	10.5264	10.6682	9.98557	10.333	10.581	944.391	1470.31	1417.47	1027.48	1474.9	1627.23	1013.81	1289.86	1531.79	0.348324	0.095355	0.130317	0.152217	0.083847	0.156891	0.157054	0.088271	0.14559	BE115648	1373455_at	Paf1, RNA polymerase II associated factor, homolog (S. cerevisiae)	Rn.161558	361531	Paf1
9.46816	9.91839	10.093	9.1332	9.612	9.9344	9.30924	9.61849	9.96403	708.272	967.683	1092.18	561.522	782.529	978.481	634.396	786.057	998.785	0.131733	0.076369	0.185456	0.165862	0.13927	0.217945	0.076542	0.162549	0.154286	BF415575	1384153_at	Janus kinase and microtubule interacting protein 2	Rn.208530	307479	Jakmip2
8.76643	9.37837	9.48024	8.86762	9.36756	9.31776	8.83999	9.37717	9.3795	435.47	665.535	714.228	467.11	660.567	638.154	458.25	664.981	666.056	0.294151	0.153387	0.156049	0.136893	0.128163	0.107802	0.136629	0.120735	0.1166	AA957383	1379456_at	Transcribed locus, strongly similar to NP_001019956.1 mitochondrial carrier triple repeat 1 [Rattus norvegicus]	Rn.107978	-	-
8.34728	8.62965	8.79436	7.84972	8.51628	8.61266	8.01182	8.41455	8.73982	325.673	396.081	443.983	230.675	366.147	391.443	258.106	341.218	427.512	0.118237	0.112064	0.274478	0.182052	0.149964	0.256401	0.20407	0.185174	0.235008	AI712625	1385101_a_at	Coiled-coil domain containing 127	Rn.21666	308060	Ccdc127
8.74959	9.18053	9.46623	8.96369	9.24465	9.67347	8.75807	9.12845	9.5035	430.417	580.25	707.325	499.275	606.62	816.591	432.954	559.677	725.836	0.299047	0.083433	0.15909	0.218401	0.10736	0.195714	0.149268	0.044797	0.155115	NM_017141	1387142_at	Polymerase (DNA directed), beta	Rn.9346	29240	Polb
8.0996	8.60261	8.59131	6.89118	7.48103	7.50358	7.92096	8.41301	8.55053	274.298	388.726	385.693	118.7	178.655	181.469	242.352	340.854	374.944	0.206554	0.141058	0.177368	0.120068	0.110933	0.175417	0.170679	0.130876	0.133532	AW522858	1380160_at	Transcribed locus	Rn.27560	-	-
6.33701	7.13462	7.19095	6.48569	6.83961	6.96115	6.54258	6.72867	7.08643	80.8407	140.519	146.114	89.6163	114.532	124.599	93.2208	106.055	135.903	0.273315	0.139995	0.159981	0.063381	0.175422	0.21672	0.165039	0.128712	0.078033	AI717547	1373868_at	BCL2-associated transcription factor 1	Rn.15652	293017	Bclaf1
4.8432	4.62311	5.71892	4.5232	4.48874	5.31557	4.30424	4.37791	5.53808	28.7044	24.6431	52.6704	22.9942	22.4515	39.8241	19.7563	20.7913	46.4652	0.40854	0.234011	0.414027	0.256646	0.253958	0.450839	0.225637	0.322575	0.459611	NM_012563	1369462_at	Glutamate decarboxylase 2	Rn.29951	24380	Gad2
6.42445	6.54548	6.96118	6.53521	6.82365	7.00071	6.17581	6.73435	7.30368	85.8919	93.4084	124.602	92.7458	113.272	128.063	72.2943	106.473	157.989	0.201529	0.311373	0.214235	0.226383	0.225283	0.202314	0.139912	0.254839	0.204996	AW142947	1395439_at	Transcribed locus	Rn.25190	-	-
6.81819	7.4677	7.54169	6.99851	7.34139	7.3496	6.83667	7.13234	7.6878	112.844	177.012	186.327	127.868	162.173	163.099	114.299	140.297	206.186	0.115715	0.128227	0.168707	0.084914	0.105632	0.101921	0.045162	0.106155	0.211665	AA998946	1395199_at	Eukaryotic translation initiation factor 3, subunit J	Rn.162681	691947	Eif3j
8.85969	9.5947	9.39759	9.13585	9.57907	9.6756	8.89604	9.37744	9.43892	464.55	773.201	674.46	562.555	764.87	817.798	476.403	665.106	694.062	0.313567	0.064664	0.119652	0.139246	0.085875	0.155571	0.194873	0.112875	0.133167	AI103467	1370919_at	Heterogeneous nuclear ribonucleoprotein M	Rn.10156	116655	Hnrpm
10.4523	11.297	11.1675	10.5611	11.0615	10.9314	10.7044	11.1053	11.1015	1401.06	2516.15	2300.13	1510.8	2137.19	1952.9	1668.57	2203.07	2197.28	0.372353	0.06847	0.106063	0.056154	0.036109	0.094926	0.114705	0.167033	0.096881	NM_031595	1387120_at	Proteasome (prosome, macropain) 26S subunit, ATPase 3	Rn.11173	29677	Psmc3
9.38962	9.76836	10.0054	9.37068	9.81536	9.95015	9.29191	9.72623	10.0909	670.745	872.106	1027.84	661.997	900.985	989.222	626.821	847.007	1090.6	0.142424	0.120092	0.205938	0.125605	0.105253	0.174337	0.110138	0.112529	0.160954	BI296526	1375641_at	Actin related protein 2/3 complex, subunit 5-like	Rn.110752	296710	Arpc5l
8.17922	8.68993	8.44392	8.14796	8.85332	8.82735	7.97702	8.56663	8.4753	289.862	412.981	348.236	283.648	462.503	454.252	251.955	379.151	355.893	0.116677	0.066054	0.121684	0.150788	0.126842	0.101986	0.133641	0.106016	0.12389	AI412685	1371498_at	JTV1 gene	Rn.162097	288480	Jtv1
4.3924	4.68145	5.16196	3.7612	3.97425	4.19206	4.10356	4.80911	4.87439	21.0012	25.66	35.8018	13.5592	15.717	18.2783	17.1907	28.0341	29.3317	0.313392	0.135087	0.2205	0.155843	0.126364	0.261101	0.219146	0.148669	0.203545	NM_133587	1368699_at	Down syndrome cell adhesion molecule	Rn.24399	171119	Dscam
5.48659	6.3049	6.14938	5.80466	6.15737	6.1383	5.65884	6.1786	6.19155	44.8361	79.0613	70.9819	55.8955	71.3761	70.4389	50.522	72.4342	73.0874	0.192524	0.082639	0.105613	0.097266	0.088486	0.076623	0.184301	0.065909	0.143402	AI175848	1380060_at	Topoisomerase (DNA) I, mitochondrial	Rn.31307	300029	Top1mt
7.75748	8.75348	7.92101	8.13978	9.03944	8.35686	7.93945	8.63167	7.94318	216.388	431.579	242.36	282.045	526.19	327.843	245.478	396.636	246.114	0.218558	0.097257	0.197689	0.100617	0.091893	0.146321	0.138614	0.142175	0.163761	AI411601	1371789_at	ClpP caseinolytic peptidase, ATP-dependent, proteolytic subunit homolog (E. coli)	Rn.12681	301117	Clpp
7.46851	8.06399	8.11667	7.96916	8.24703	8.42114	7.41617	7.76832	8.28428	177.111	267.61	277.563	250.586	303.811	342.78	170.801	218.021	311.757	0.333277	0.165412	0.147505	0.181313	0.138107	0.229581	0.16847	0.236114	0.183324	BM387425	1370844_at	Heterogeneous nuclear ribonucleoprotein F	Rn.144596	64200	Hnrnpf
5.30526	6.23172	6.23451	5.98786	6.14767	6.06946	5.69296	5.9674	6.33689	39.5405	75.151	75.2965	63.4637	70.8979	67.1567	51.7311	62.57	80.834	0.353239	0.076429	0.13675	0.180278	0.131741	0.157525	0.107901	0.116757	0.085307	BF563196	1386687_at	Transcribed locus, strongly similar to NP_666072.2 mitochondrial translational release factor 1 [Mus musculus]	Rn.216791	-	-
3.71652	3.91623	4.28511	3.67219	3.99936	4.29986	3.34876	3.93653	4.21092	13.1457	15.0974	19.4961	12.7479	15.9929	19.6964	10.1877	15.3114	18.5188	0.08929	0.172778	0.292516	0.086377	0.114091	0.268613	0.114584	0.244225	0.29532	BM383325	1373303_at	Splicing factor, arginine/serine-rich 2, interacting protein	Rn.199124	312030	Sfrs2ip
8.1336	8.82512	8.73174	6.21075	6.81503	6.74629	8.33878	8.70294	8.78896	280.839	453.551	425.124	74.0665	112.597	107.358	323.76	416.722	442.324	0.253299	0.116109	0.105715	0.071972	0.105705	0.112491	0.099192	0.134469	0.147981	AI144754	1381533_at	Rho family GTPase 1	Rn.198250	362993	Rnd1
9.3756	10.1825	9.98254	9.39656	9.79037	9.73865	9.45124	9.99662	9.96885	664.258	1162.09	1011.68	673.979	885.513	854.33	700.014	1021.6	1002.13	0.300033	0.109844	0.077368	0.121537	0.109227	0.109295	0.144089	0.098445	0.089284	AI012747	1371808_at	Bleomycin hydrolase	Rn.100672	287552	Blmh
9.63472	10.5018	10.2697	9.79245	10.3996	10.093	9.96909	10.4431	10.258	794.95	1449.96	1234.49	886.791	1350.8	1092.18	1002.29	1392.15	1224.52	0.452987	0.140529	0.058347	0.058229	0.041668	0.058805	0.10905	0.084084	0.069356	AB006450	1370304_at	Translocase of inner mitochondrial membrane 17 homolog A (yeast)	Rn.22514	54311	Timm17a
11.7054	12.5911	12.4221	12.0818	12.4454	12.431	11.9194	12.2781	12.4021	3339.46	6170.19	5488.13	4334.95	5577.49	5522.1	3873.44	4966.8	5412.58	0.383264	0.034548	0.141642	0.095812	0.06258	0.115911	0.116147	0.106447	0.13203	NM_012749	1398832_at	Nucleolin	Rn.144561	25135	Ncl
8.24671	9.02468	9.17371	8.07768	8.42168	8.47128	8.6788	8.95103	9.0819	303.744	520.834	577.513	270.162	342.909	354.903	409.807	494.913	541.906	0.453324	0.098921	0.095889	0.056584	0.053835	0.089142	0.061415	0.082552	0.099766	BI301467	1389672_at	UHRF1 binding protein 1-like	Rn.56018	363009	Uhrf1bp1l
7.22646	7.44917	7.57264	7.53109	8.2841	8.45471	6.99903	7.41324	7.45731	149.755	174.753	190.367	184.963	311.719	350.85	127.914	170.454	175.741	0.202571	0.097937	0.071689	0.167927	0.20061	0.149653	0.140238	0.096569	0.074331	AI410655	1386348_at	Transcribed locus	Rn.125035	-	-
10.4013	11.0782	11.0789	10.2359	10.4612	10.7387	10.6169	11.0984	11.2441	1352.39	2162.07	2163.12	1205.9	1409.73	1708.72	1570.38	2192.56	2425.56	0.176444	0.1865	0.050587	0.178098	0.148822	0.14311	0.122816	0.159153	0.092488	BE104709	1372235_at	ESTs	-	-	-
6.32098	6.90786	6.95645	6.5619	6.79474	7.14446	6.44042	6.87826	7.15262	79.9474	120.081	124.194	94.4776	111.025	141.481	86.848	117.642	142.283	0.308919	0.266239	0.19902	0.136795	0.060779	0.163467	0.119127	0.112887	0.12458	AI549388	1379699_at	Transcribed locus	Rn.6636	-	-
11.5758	11.9805	12.1291	11.5862	12.0258	12.2461	11.48	11.8766	12.222	3052.55	4041.01	4479.43	3074.64	4169.91	4857.84	2856.44	3760.22	4777.37	0.225076	0.109929	0.133682	0.188579	0.082253	0.218368	0.165268	0.136885	0.174655	AW532713	1385321_at	Similar to Protein arginine N-methyltransferase 4 (Heterogeneous nuclear ribonucleoprotein methyltransferase-like protein 4)	Rn.152082	688502	LOC688502
6.89231	7.67134	7.23887	6.49687	7.14844	6.8421	6.89022	7.59172	7.21885	118.793	203.847	151.049	90.3135	141.871	114.73	118.621	192.901	148.967	0.202467	0.0897	0.170531	0.067254	0.079104	0.111905	0.182319	0.104088	0.091506	BG381739	1376423_at	F-box and leucine-rich repeat protein 19	Rn.50190	308999	Fbxl19
4.84732	4.88165	5.85729	4.94129	4.87053	5.51001	4.83293	5.05441	5.88058	28.7865	29.4797	57.9722	30.7239	29.2534	45.5699	28.5008	33.2299	58.9157	0.290489	0.139375	0.185491	0.219178	0.181179	0.373218	0.19813	0.198928	0.292743	AW534671	1379259_at	Transcribed locus	Rn.146603	-	-
9.75955	10.2287	10.3511	9.95002	10.4493	10.3821	9.58382	10.1142	10.2657	866.797	1199.9	1306.15	989.133	1398.15	1334.52	767.392	1108.35	1231.07	0.190811	0.160121	0.206702	0.110729	0.07253	0.247623	0.112094	0.13786	0.185922	NM_017319	1398788_at	Protein disulfide isomerase family A, member 3	Rn.11527	29468	Pdia3
6.67633	7.29083	7.23988	6.61873	7.08791	7.32606	6.77227	7.05823	7.30842	102.276	156.588	151.154	98.2735	136.042	160.459	109.309	133.272	158.509	0.42901	0.064848	0.094374	0.145066	0.077759	0.188413	0.17271	0.131861	0.069589	NM_053830	1387151_at	Nucleoporin 107	Rn.11398	116555	Nup107
6.42842	6.98662	6.99035	6.73668	7.2511	7.35503	6.48299	6.89793	7.0173	86.1286	126.818	127.147	106.646	152.335	163.714	89.4488	119.257	129.544	0.319452	0.103163	0.094527	0.184305	0.119459	0.262081	0.138679	0.08213	0.182639	AA818627	1393690_at	Insulin induced gene 2	Rn.16736	288985	Insig2
4.32164	4.77997	4.9421	4.17437	4.48246	5.02996	4.20463	4.59448	4.71455	19.996	27.4735	30.7412	18.0555	22.354	32.6715	18.4383	24.1589	26.2555	0.158024	0.110971	0.170696	0.164594	0.131379	0.170244	0.077771	0.106005	0.129744	BF420742	1392286_at	Transcribed locus	Rn.125958	-	-
7.1617	8.07368	7.75641	6.96251	7.51854	7.25386	7.33916	7.72428	7.71279	143.181	269.414	216.228	124.717	183.361	152.626	161.923	211.466	209.788	0.262219	0.111091	0.06987	0.104972	0.043009	0.173499	0.10906	0.158971	0.10738	BI279840	1375998_at	Anaphase promoting complex subunit 7	Rn.162124	304490	Anapc7
3.85672	4.2942	4.61755	3.73724	4.17499	4.43901	3.99177	3.97047	4.7313	14.4873	19.6193	24.5483	13.3359	18.0633	21.6908	15.909	15.6758	26.5621	0.18176	0.220565	0.271274	0.211581	0.103419	0.303894	0.127958	0.233415	0.338005	BM387928	1382976_at	Transcribed locus	Rn.203690	-	-
8.71193	9.16218	9.20172	8.22055	8.67394	8.81876	8.64384	9.11866	9.35601	419.326	572.916	588.835	298.285	408.429	451.556	399.996	555.892	655.299	0.182849	0.151573	0.219828	0.21542	0.116047	0.125803	0.241136	0.092203	0.190843	BF409997	1377442_at	Transcribed locus	Rn.45278	-	-
8.19973	8.62219	8.45332	7.37644	7.90945	8.00065	7.88582	8.40429	8.67413	294.012	394.038	350.512	166.161	240.426	256.115	236.52	338.8	408.482	0.225247	0.107522	0.152106	0.087773	0.042228	0.124483	0.123225	0.102913	0.118962	BF410569	1398731_at	Transcribed locus	Rn.61742	-	-
4.39995	4.48077	5.06284	4.31031	4.64557	4.93797	4.00363	4.42022	4.9268	21.1114	22.3278	33.4246	19.8396	25.0297	30.6533	16.0403	21.4101	30.4169	0.246992	0.104021	0.215437	0.04924	0.160761	0.341897	0.111366	0.098354	0.27698	BI294752	1394985_at	Early endosome antigen 1	Rn.23513	314764	Eea1
6.3654	7.07005	6.76303	6.4102	7.08216	6.83263	6.36965	7.04613	6.62676	82.4473	134.368	108.611	85.0477	135.501	113.979	82.6905	132.159	98.822	0.104223	0.050726	0.086938	0.092389	0.055926	0.031746	0.166573	0.072156	0.108273	BF566761	1386711_a_at	DnaJ (Hsp40) homolog, subfamily C, member 11	Rn.66161	362666	Dnajc11
7.31069	7.87736	7.83838	7.13479	7.67282	7.60202	7.26279	7.74054	7.86992	158.758	235.137	228.869	140.535	204.056	194.284	153.574	213.863	233.928	0.345315	0.065515	0.105564	0.090124	0.057964	0.164294	0.138108	0.182323	0.087181	AI104594	1373906_at	Family with sequence similarity 173, member B	Rn.30929	499561	Fam173b
7.03927	7.40033	7.97495	5.46048	5.42773	6.04911	7.01795	7.50117	7.6911	131.532	168.936	251.593	44.032	43.0437	66.2161	129.603	181.166	206.658	0.335264	0.257755	0.164846	0.055254	0.267531	0.202727	0.231417	0.184916	0.117464	BF404914	1396787_at	Transcribed locus	Rn.59962	-	-
6.50539	7.30526	6.9964	6.83703	7.49457	7.33645	6.67997	7.01185	7.02291	90.8485	158.162	127.681	114.328	180.339	161.619	102.535	129.056	130.049	0.249294	0.085031	0.106259	0.056081	0.12133	0.064985	0.087191	0.163286	0.174509	BI295313	1382856_at	XRCC6 binding protein 1	Rn.61651	299828	Xrcc6bp1
7.29418	7.83564	7.92159	7.23747	7.74107	7.7469	7.42668	7.84319	8.00015	156.952	228.435	242.458	150.902	213.941	214.807	172.05	229.634	256.027	0.190127	0.055342	0.072668	0.074852	0.0753	0.045127	0.126566	0.046921	0.103296	AF094609	1370398_at	spermatogenesis associated 7	-	192225	-
8.98175	9.80008	9.67258	9.23885	9.64359	9.54188	9.27416	9.79642	9.64297	505.564	891.493	816.087	604.186	799.852	745.405	619.156	889.234	799.509	0.315128	0.048841	0.063464	0.048115	0.054791	0.04347	0.069846	0.0912	0.05166	NM_130749	1368831_at	MAP/microtubule affinity-regulating kinase 3	Rn.23232	170577	Mark3
5.37674	6.2362	5.86812	7.78682	8.29264	7.94202	5.61963	6.18883	6.12912	41.5489	75.3847	58.409	220.834	313.569	245.916	49.1674	72.9497	69.9921	0.303184	0.152105	0.164925	0.103396	0.227627	0.203716	0.178245	0.171309	0.177845	NM_080399	1368013_at	DNA-damage-inducible transcript 4-like	Rn.19672	140582	Ddit4l
5.2443	5.44981	5.80899	4.7893	5.36023	5.45247	5.1068	5.6316	5.70837	37.9046	43.7075	56.0635	27.6518	41.0762	43.7882	34.4588	49.577	52.2866	0.242299	0.163397	0.174913	0.127505	0.146472	0.211253	0.161594	0.098542	0.219071	BM391921	1391669_at	Protein tyrosine phosphatase, receptor type, B	Rn.198784	314843	Ptprb
6.89957	7.24	7.31118	6.70608	7.33218	7.41802	6.78088	7.31088	7.2912	119.393	151.167	158.812	104.407	161.141	171.02	109.963	158.779	156.628	0.224198	0.105679	0.278353	0.187844	0.169804	0.178949	0.15693	0.1175	0.173416	BI294227	1389340_at	Zinc finger protein 318	Rn.28520	685082	Zfp318
2.22902	2.4047	2.9336	2.24859	2.54383	2.84769	2.13513	2.50454	3.02106	4.68815	5.29525	7.64014	4.75218	5.83135	7.19847	4.39277	5.67468	8.11764	0.126636	0.114934	0.280396	0.197182	0.160328	0.310477	0.136182	0.078281	0.313524	BE095963	1375508_at	Transcribed locus, strongly similar to NP_001139251.1 kinesin family member 2A isoform 2 [Mus musculus]	Rn.154745	-	-
7.85431	8.38011	8.10014	7.56476	8.38947	8.17871	7.7285	8.26081	8.06912	231.41	333.169	274.401	189.33	335.337	289.759	212.085	306.727	268.564	0.196058	0.112915	0.125649	0.173408	0.10715	0.070142	0.185139	0.127786	0.202026	BI282651	1372026_at	Similar to RIKEN cDNA 9430023L20	Rn.4038	300240	RGD1359310
6.59278	6.85747	7.31931	6.52884	6.61593	7.03122	6.3918	6.86092	7.32578	96.5216	115.959	159.71	92.3372	98.0829	130.8	83.9699	116.237	160.428	0.328401	0.19868	0.162827	0.203814	0.20814	0.125462	0.264615	0.218502	0.174389	BE109730	1383479_at	Transcribed locus	Rn.203146	-	-
11.0527	11.5453	11.7783	11.1031	11.4095	11.7608	11.1552	11.3492	11.84	2124.19	2988.7	3512.54	2199.71	2720.21	3470.19	2280.6	2608.85	3666.02	0.349271	0.096217	0.175725	0.138969	0.065793	0.202289	0.085876	0.139427	0.109171	BM392140	1370871_at	Heterogeneous nuclear ribonucleoprotein A3	Rn.107690	362152	Hnrnpa3
7.01604	7.64569	7.3723	6.89925	7.55338	7.42913	7.06267	7.6533	7.40477	129.431	200.254	165.685	119.366	187.843	172.342	133.683	201.313	169.456	0.075254	0.069091	0.043006	0.086094	0.091981	0.053933	0.136291	0.079732	0.094259	BF290018	1374152_at	WD repeat domain 46	Rn.104783	309628	Wdr46
5.59757	6.18162	6.16085	5.40217	5.97024	5.8757	5.61781	6.13366	6.04078	48.4213	72.586	71.5485	42.2878	62.6933	58.7167	49.1054	70.2127	65.8349	0.346132	0.085796	0.111345	0.198555	0.164598	0.085938	0.184117	0.126164	0.133632	BE110671	1390082_at	Huntingtin interacting protein 1	Rn.836	192154	Hip1
7.90314	8.20747	8.43783	7.895	8.29795	8.57728	7.6228	8.03633	8.36183	239.377	295.593	346.769	238.03	314.725	381.961	197.102	262.528	328.974	0.167827	0.066927	0.203715	0.153855	0.12178	0.232871	0.102047	0.132082	0.220958	BI274940	1376674_at	Mannosidase 2, alpha 2	Rn.41796	308757	Man2a2
9.13621	9.97675	9.59121	9.36549	9.93346	9.72306	9.31094	9.86755	9.58209	562.695	1007.63	771.333	659.619	977.844	845.148	635.144	934.176	766.472	0.142514	0.082037	0.088281	0.060562	0.08852	0.071411	0.148567	0.083831	0.086571	BG380216	1388134_at	Eukaryotic translation elongation factor 1 delta (guanine nucleotide exchange protein)	Rn.71883	300033	Eef1d
7.52567	8.27418	7.96145	7.31323	7.80439	7.50193	7.49155	8.25577	7.89448	184.269	309.582	249.25	159.038	223.54	181.262	179.962	305.657	237.944	0.099273	0.23417	0.263887	0.201834	0.26034	0.169054	0.154782	0.145669	0.234068	BE097451	1396381_at	Hypothetical protein LOC688736	Rn.72979	688736	MGC116202
7.35174	7.3733	7.70064	6.95181	7.25795	7.75368	6.84554	7.14934	7.91138	163.341	165.8	208.029	123.795	153.06	215.819	115.004	141.96	240.748	0.345567	0.108839	0.254038	0.207025	0.163159	0.320443	0.173444	0.162592	0.243529	AF013965	1387117_at	Zinc finger, RAN-binding domain containing 2	Rn.11361	58821	Zranb2
3.47716	3.86127	3.77994	3.31816	3.89778	3.93322	3.39901	3.78539	4.18356	11.136	14.5331	13.7365	9.97392	14.9056	15.2763	10.5488	13.7885	18.1709	0.164599	0.21587	0.159913	0.104951	0.175746	0.152199	0.128817	0.139671	0.184708	BG380668	1381501_at	Transcribed locus	Rn.66760	-	-
10.975	11.7096	11.647	11.1049	11.5412	11.4683	11.2204	11.6083	11.6846	2012.82	3349.2	3206.98	2202.46	2980.21	2833.36	2386.04	3122.1	3291.66	0.312961	0.040838	0.066614	0.060344	0.0534	0.05715	0.108482	0.088483	0.052732	BE113079	1372829_at	RNA binding motif protein 8	Rn.37716	295284	Rbm8
6.78569	7.55091	7.37618	6.72321	7.30571	7.06144	7.04333	7.54346	7.30771	110.331	187.521	166.131	105.654	158.211	133.569	131.903	186.555	158.431	0.185323	0.079275	0.141869	0.078645	0.072662	0.085619	0.150234	0.072047	0.096118	AI070399	1399041_at	Similar to OPA3 protein	Rn.20653	502305	RGD1561117
9.38843	9.332	9.79682	7.85076	8.41676	8.9238	9.14927	9.27018	9.84613	670.192	644.484	889.481	230.842	341.741	485.659	567.812	617.451	920.408	0.193681	0.097771	0.20447	0.166764	0.173468	0.239271	0.168732	0.109335	0.16466	AW534949	1385788_at	Eph receptor B3	Rn.131133	287989	Ephb3
3.16908	3.45932	4.08383	2.63651	2.79362	2.95846	2.99186	3.34465	3.86249	8.99473	10.9991	16.9572	6.21826	6.93367	7.77294	7.95499	10.1587	14.5454	0.145693	0.2276	0.401299	0.051793	0.120702	0.098332	0.137787	0.197948	0.314797	NM_022191	1369046_at	Synaptotagmin VI	Rn.48074	60565	Syt6
5.61774	6.46834	6.21367	5.31233	5.93366	5.75561	5.78147	6.03158	6.01409	49.103	88.5451	74.2166	39.7348	61.1237	54.027	55.0042	65.4164	64.6281	0.205668	0.102295	0.158426	0.085506	0.091009	0.09436	0.105534	0.307854	0.154494	BF552772	1386793_at	Zinc finger protein 61	Rn.122263	499094	Zfp61
5.52339	5.97306	6.13564	5.63335	5.89797	6.51576	5.43656	5.66819	5.98504	45.9945	62.816	70.3091	49.6372	59.6301	91.5038	43.308	50.8505	63.3398	0.214476	0.166084	0.202884	0.207176	0.218922	0.263068	0.152178	0.172542	0.201933	AI385171	1375723_at	Transcribed locus	Rn.167755	-	-
6.82233	7.33627	7.31976	6.39883	7.00183	7.14378	6.85584	7.11823	7.2741	113.169	161.599	159.76	84.38	128.162	141.414	115.828	138.932	154.783	0.208171	0.118296	0.208675	0.201896	0.117211	0.189127	0.15343	0.19158	0.178457	U32575	1370686_at	Exocyst complex component 3	Rn.6753	252881	Exoc3
9.29006	9.85405	9.84292	8.08232	8.83191	8.81016	9.60864	9.74386	9.84833	626.018	925.475	918.363	271.032	455.69	448.872	780.708	857.421	921.813	0.246541	0.096383	0.056068	0.16889	0.180556	0.10901	0.062316	0.087085	0.119553	BE104098	1389728_at	Meis homeobox 2	Rn.45546	311311	Meis2
3.50792	3.84818	4.34184	3.65665	3.85054	4.3473	3.63733	3.95082	4.22073	11.376	14.4018	20.278	12.6113	14.4254	20.3548	12.4436	15.4638	18.6452	0.096556	0.13316	0.288367	0.14311	0.154143	0.347392	0.065099	0.060933	0.260614	AW530801	1385091_at	Mediator complex subunit 13	Rn.94023	303403	Med13
4.19892	4.68882	4.89033	5.07346	5.49057	5.47648	4.30695	4.79155	4.86288	18.3654	25.7914	29.6576	33.6716	44.96	44.523	19.7934	27.6949	29.0986	0.175796	0.17286	0.218486	0.224985	0.122655	0.216894	0.154509	0.150364	0.169832	U53475	1370539_at	RAB8B, member RAS oncogene family	Rn.10995	266688	Rab8b
7.98445	8.45763	8.4809	5.98535	6.50354	6.54948	7.74087	8.08302	8.38802	253.256	351.561	357.277	63.3534	90.732	93.6677	213.911	271.164	335.001	0.166314	0.15191	0.226446	0.152966	0.100415	0.237692	0.17259	0.273755	0.164813	AI070135	1383830_a_at	Oxysterol binding protein-like 1A	Rn.178664	259221	Osbpl1a
9.55861	9.96433	9.98809	9.06215	9.59684	9.8272	9.38209	9.63562	9.9951	754.099	998.992	1015.58	534.538	774.349	908.41	667.253	795.446	1020.53	0.269779	0.111701	0.231282	0.1896	0.074672	0.212327	0.15367	0.156492	0.127601	AI501880	1393938_at	Transcribed locus	Rn.167905	-	-
8.8342	9.17548	9.23869	8.24252	8.73481	8.9633	8.57714	9.0054	9.20265	456.414	578.222	604.119	302.863	426.03	499.14	381.924	513.92	589.215	0.111022	0.134673	0.259617	0.125129	0.220396	0.232361	0.142801	0.116395	0.270096	NM_031093	1368405_at	V-ral simian leukemia viral oncogene homolog A (ras related)	Rn.100380	81757	Rala
10.0078	10.9518	10.6313	9.77539	10.3819	9.93407	10.4089	10.8109	10.5534	1029.55	1980.71	1586.14	876.366	1334.33	978.257	1359.54	1796.41	1502.76	0.288165	0.145372	0.155756	0.171347	0.147724	0.150642	0.190334	0.233136	0.232172	AW533298	1370197_a_at	Protein kinase C, zeta	Rn.1109	25522	Prkcz
9.4738	10.0414	9.87075	9.36739	9.88552	9.80748	9.37413	9.98218	9.87017	711.046	1053.81	936.25	660.489	945.884	896.078	663.582	1011.43	935.874	0.332171	0.119287	0.108712	0.10232	0.065595	0.161373	0.160418	0.078641	0.126801	BE117936	1374420_at	Similar to RIKEN cDNA 2310001A20	Rn.2352	366227	RGD1308874
7.98508	8.46191	8.07108	7.52163	8.51255	8.28125	7.99054	8.31175	8.16875	253.366	352.605	268.929	183.754	365.202	311.103	254.327	317.75	287.766	0.240286	0.067663	0.112543	0.236189	0.161187	0.153693	0.162994	0.088427	0.099422	AI146262	1385849_at	Transcribed locus	Rn.28788	-	-
6.52131	7.20342	6.67558	6.09831	7.07754	6.22032	6.60489	7.3743	6.64198	91.8565	147.382	102.223	68.5132	135.068	74.5595	97.3352	165.915	99.87	0.294734	0.168912	0.159727	0.280157	0.259192	0.165455	0.181459	0.266285	0.183198	BM385476	1390738_at	Bone marrow stromal cell antigen 2	Rn.32168	378947	Bst2
8.36868	8.83025	8.89191	8.86313	9.24395	9.48173	8.52959	8.99466	9.0895	330.54	455.166	475.042	465.659	606.326	714.966	369.541	510.108	544.769	0.399273	0.108837	0.106199	0.133388	0.076279	0.136027	0.165047	0.097423	0.115661	AA997359	1375003_at	Serine (or cysteine) peptidase inhibitor, clade B, member 6a	Rn.12754	291085	Serpinb6a
5.40302	6.20469	5.86493	5.7645	6.47856	5.96417	5.51962	6.04769	5.72737	42.3127	73.7561	58.28	54.361	89.1745	62.4301	45.8745	66.151	52.9798	0.159918	0.199284	0.091063	0.105147	0.084091	0.098395	0.153825	0.152121	0.126551	NM_021577	1368916_at	Argininosuccinate lyase	Rn.64591	59085	Asl
9.72701	10.0035	9.78041	8.98022	9.58147	9.50805	9.15786	9.80212	9.95198	847.465	1026.49	879.421	505.028	766.143	728.129	571.203	892.755	990.477	0.269736	0.057824	0.197773	0.120293	0.059457	0.184278	0.168841	0.089498	0.112481	BI276990	1389913_at	Leucine rich repeat (in FLII) interacting protein 1	Rn.153995	367314	Lrrfip1
4.50379	4.7983	5.07787	4.37291	4.59476	5.286	4.3758	4.66381	4.97844	22.6869	27.8248	33.7747	20.7194	24.1635	39.0162	20.7609	25.3482	31.5253	0.206093	0.164691	0.203998	0.046893	0.177736	0.383473	0.130733	0.128457	0.31647	BF387780	1377117_at	ESTs	-	-	-
5.82043	6.60162	6.54579	5.89035	6.31702	5.97691	5.97272	6.42724	6.41127	56.5098	97.1148	93.4284	59.316	79.7283	62.9838	62.8012	86.0582	85.1108	0.214293	0.181382	0.177632	0.124521	0.135631	0.230405	0.105582	0.129534	0.226218	BF561717	1383698_at	Pyruvate dehydrogenase (lipoamide) alpha 1	Rn.3655	29554	Pdha1
9.43335	10.1258	9.86216	9.64313	10.2543	9.98265	9.46533	10.0298	9.8064	691.387	1117.3	930.692	799.597	1221.38	1011.76	706.884	1045.37	895.407	0.18817	0.056737	0.06068	0.063902	0.065938	0.068154	0.118369	0.103272	0.047746	AA799526	1371848_at	Transcribed locus, strongly similar to NP_001007839.1 small nuclear ribonucleoprotein D3 polypeptide 18kDa [Gallus gallus]	Rn.216464	-	-
12.466	12.8042	12.8352	12.1913	12.7674	12.8141	12.2233	12.6544	12.8658	5657.7	7152.34	7307.69	4676.78	6972.21	7201.59	4781.67	6446.95	7464.35	0.103457	0.075397	0.121178	0.12661	0.098215	0.125226	0.101577	0.076747	0.097093	AF388527	1388076_at	Serpine1 mRNA binding protein 1	Rn.203108	246303	Serbp1
7.19016	7.8599	7.85379	7.40349	7.61047	7.88954	7.36724	7.7356	7.92537	146.034	232.309	231.327	169.306	195.425	237.131	165.105	213.131	243.094	0.267056	0.082583	0.070035	0.111243	0.059907	0.189108	0.05531	0.0766	0.100836	BE116569	1374208_at	Zinc finger CCCH type containing 7 A	Rn.15835	360466	Zc3h7a
7.56056	8.26113	7.9952	7.24188	7.82767	7.71264	7.58798	8.02818	7.93287	188.78	306.795	255.15	151.364	227.177	209.766	192.402	261.05	244.361	0.094383	0.049308	0.085259	0.058863	0.10765	0.066943	0.069218	0.077692	0.105782	BI293141	1396013_at	Leucine zipper-EF-hand containing transmembrane protein 1	Rn.162290	305457	Letm1
8.21087	8.84062	8.72249	8.10983	8.53858	8.61891	8.30323	8.68706	8.82916	296.291	458.45	422.407	276.25	371.851	393.143	315.879	412.16	454.823	0.4102	0.066897	0.138305	0.124403	0.066146	0.106673	0.133424	0.053258	0.122526	BI303582	1383388_at	Transcribed locus, strongly similar to NP_081546.1 exocyst complex component 1 [Mus musculus]	Rn.155360	-	-
10.1156	10.8547	10.7736	10.2069	10.6719	10.5914	10.3526	10.64	10.7661	1109.43	1851.78	1750.56	1181.91	1631.41	1542.87	1307.5	1595.73	1741.48	0.23613	0.060856	0.070248	0.050385	0.081938	0.058132	0.079153	0.075504	0.079797	BI276261	1372764_at	Similar to density-regulated protein	Rn.101864	689601	LOC689601
10.9467	11.5527	11.4093	10.9889	11.4745	11.3278	10.8896	11.4122	11.4585	1973.72	3004.06	2719.83	2032.3	2845.57	2570.44	1897.13	2725.3	2814.18	0.213509	0.096986	0.172003	0.079116	0.063873	0.123634	0.132247	0.105703	0.082088	AI104005	1368992_a_at	Transcribed locus, strongly similar to NP_001034554.1 splicing factor, arginine/serine-rich 5 [Homo sapiens]	Rn.220067	-	-
7.95493	8.8707	8.73548	8.55742	8.80789	8.75946	8.58102	9.03906	8.80307	248.126	468.109	426.228	376.739	448.166	433.371	382.952	526.051	446.671	0.290827	0.133447	0.145403	0.137904	0.129451	0.128377	0.133897	0.117162	0.147834	AI178277	1390133_at	BCL2/adenovirus E1B interacting protein 2	Rn.11821	300811	Bnip2
6.34994	6.96625	6.66207	5.98979	6.84244	6.48958	6.4602	6.88317	6.65211	81.5685	125.04	101.27	63.5487	114.757	89.8583	88.0469	118.043	100.574	0.205278	0.079609	0.14383	0.153803	0.086144	0.156099	0.147913	0.134884	0.214648	NM_024488	1367879_at	CDK5 regulatory subunit associated protein 3	Rn.3727	80278	Cdk5rap3
5.22104	5.69824	5.64014	5.53729	6.04956	6.14992	5.03937	5.47199	5.56836	37.2984	51.9208	49.8714	46.4398	66.2368	71.0085	32.8853	44.3847	47.4508	0.181302	0.047087	0.131106	0.119826	0.109296	0.16198	0.137357	0.166175	0.111457	BG669146	1394928_at	XK, Kell blood group complex subunit-related family, member 4	Rn.206440	297801	Xkr4
7.39529	7.94049	7.83365	6.89384	7.41086	7.43049	7.35073	7.70863	7.92492	168.347	245.655	228.12	118.919	170.173	172.504	163.226	209.184	243.018	0.107755	0.077805	0.101059	0.126666	0.071006	0.059785	0.100447	0.139043	0.091607	BF401728	1391195_at	Transcribed locus, strongly similar to NP_082466.2 Luc7 homolog (S. cerevisiae)-like isoform 2 [Mus musculus]	Rn.210064	-	-
8.68052	8.77944	9.28565	8.73168	8.87959	9.58926	8.33943	8.51824	9.20478	410.296	439.415	624.107	425.106	471.002	770.291	323.906	366.645	590.085	0.198685	0.083195	0.191081	0.189021	0.062316	0.228861	0.137136	0.159899	0.139907	BF389273	1399154_at	F-box and leucine-rich repeat protein 11	Rn.12228	361700	Fbxl11
9.14095	9.79977	9.77415	8.89728	9.38453	9.43924	9.35236	9.6134	9.70225	564.547	891.302	875.613	476.813	668.382	694.216	653.643	783.289	833.045	0.332123	0.05854	0.093925	0.139436	0.058534	0.073966	0.124649	0.126303	0.096	AA851443	1389624_s_at	Exocyst complex component 3	Rn.6753	252881	Exoc3
12.159	12.6702	12.9306	12.1728	12.5034	12.5601	12.3661	12.5886	13.0383	4573.24	6517.94	7807.26	4617.19	5806.29	6039.03	5279.19	6159.51	8412.39	0.30651	0.167136	0.083289	0.070087	0.085778	0.096365	0.085515	0.179817	0.099015	NM_012925	1367929_at	CD59 molecule, complement regulatory protein	Rn.1231	25407	Cd59
8.62253	9.09358	9.02592	9.18061	9.71231	9.75128	8.59707	8.92327	9.23978	394.131	546.312	521.282	580.282	838.874	861.842	387.236	485.481	604.576	0.27851	0.176856	0.176666	0.130648	0.159117	0.174622	0.163565	0.163294	0.122067	M34135	1370513_at	Tropomyosin 1, alpha	Rn.87540	24851	Tpm1
3.45444	3.4915	3.88597	4.49239	5.07795	5.5929	3.56635	3.68308	3.99664	10.962	11.2472	14.7841	22.5084	33.7765	48.2648	11.8462	12.8445	15.9628	0.039556	0.111675	0.193765	0.15705	0.311495	0.329195	0.0797	0.174153	0.168147	BM383749	1378128_at	Transcribed locus	Rn.211881	-	-
5.26975	5.74429	5.75512	5.04881	5.37675	5.71076	5.1891	5.66198	5.71102	38.5792	53.6048	54.0087	33.1012	41.5492	52.3733	36.4817	50.6321	52.3828	0.237163	0.099151	0.123673	0.232914	0.144019	0.162552	0.141633	0.16906	0.163913	BF549473	1383143_at	Eph receptor B2	Rn.27233	313633	Ephb2
7.12505	7.51719	7.65461	6.39937	6.76091	7.05663	7.02424	7.4449	7.60356	139.59	183.189	201.496	84.4116	108.452	133.124	130.169	174.236	194.491	0.151489	0.135231	0.116022	0.148093	0.258828	0.140829	0.111194	0.170133	0.138492	BI303187	1393779_x_at	Synaptonemal complex protein SC65	Rn.90100	59101	Sc65
7.62864	8.31246	8.20754	7.46154	7.90504	7.9675	7.76095	8.13907	8.10103	197.902	317.907	295.608	176.257	239.692	250.297	216.91	281.906	274.57	0.139497	0.106557	0.105257	0.08053	0.06523	0.085686	0.083503	0.13326	0.089081	BM386608	1390272_at	DPH5 homolog (S. cerevisiae)	Rn.12336	295394	Dph5
4.0858	4.89862	4.80851	3.73179	3.90363	4.11033	4.15191	4.37588	4.68028	16.9804	29.8285	28.0224	13.2856	14.9661	17.2716	17.7766	20.7621	25.6392	0.11498	0.157024	0.18381	0.222809	0.139855	0.210468	0.20078	0.165849	0.163563	AI229747	1379646_at	Similar to CDNA sequence BC024479	Rn.96035	500974	LOC500974
9.38398	10.0048	9.95089	9.12599	9.58632	9.58853	9.47934	9.91694	9.87545	668.128	1027.41	989.729	558.723	768.723	769.901	713.782	966.71	939.305	0.101845	0.064806	0.088125	0.052754	0.050831	0.079435	0.083654	0.073909	0.111335	BI278122	1388380_at	Sorting and assembly machinery component 50 homolog (S. cerevisiae)	Rn.12611	300111	Samm50
4.55822	5.23941	5.14538	4.6933	5.12133	5.29178	4.79124	5.13597	5.05735	23.5592	37.7763	35.3927	25.8716	34.8076	39.1728	27.689	35.1626	33.2977	0.106661	0.163014	0.172908	0.067864	0.244565	0.247364	0.155812	0.178638	0.231958	BG375380	1375442_at	M-phase phosphoprotein 10 (U3 small nucleolar ribonucleoprotein)	Rn.103228	293828	Mphosph10
9.23951	9.76017	9.55904	9.1262	9.72577	9.63473	9.07777	9.59687	9.54592	604.463	867.169	754.324	558.805	846.737	794.955	540.357	774.365	747.495	0.158463	0.064464	0.072496	0.117822	0.099881	0.069181	0.127393	0.095835	0.082291	BM986228	1371437_at	SEC13 homolog (S. cerevisiae)	Rn.1553	297522	Sec13
10.7073	11.3768	11.2108	10.7724	11.2572	11.1743	10.8035	11.2355	11.2454	1671.93	2659.24	2370.21	1749.1	2447.68	2311	1787.22	2411.14	2427.74	0.271935	0.041438	0.11958	0.089601	0.058545	0.111546	0.10963	0.077214	0.102555	BM388827	1371641_at	Similar to CCTeta, eta subunit of the chaperonin containing TCP-1 (CCT)	Rn.101811	499323	RGD1562884
6.85372	7.98375	6.68376	6.78222	7.8504	6.59655	7.3138	8.01031	6.92153	115.658	253.133	102.805	110.066	230.784	96.7742	159.101	257.836	121.224	0.415551	0.199623	0.286364	0.41821	0.310398	0.267038	0.410115	0.333068	0.29261	BI282965	1389734_x_at	RT1 class Ib, locus Aw2	Rn.154799	24737	RT1-Aw2
7.87563	8.48902	8.46446	7.94221	8.3176	8.44649	8.08778	8.43824	8.58218	234.856	359.294	353.229	245.948	319.041	348.857	272.06	346.867	383.26	0.207431	0.045021	0.099065	0.049705	0.056735	0.086314	0.10202	0.050126	0.07898	AI010668	1372060_at	ESTs	-	-	-
4.87442	5.24763	5.48346	4.36192	4.70186	4.88192	4.53809	4.77813	5.32478	29.3323	37.9922	44.739	20.5622	26.0256	29.4852	23.2328	27.4385	40.0791	0.163558	0.167902	0.273138	0.121755	0.112624	0.193561	0.143664	0.150613	0.321095	BI298766	1375883_at	Similar to Zinc finger CCHC domain-containing protein 6	Rn.16458	501515	LOC501515
7.94529	8.42359	8.40429	7.82389	8.28821	8.37103	7.81954	8.11296	8.48515	246.474	343.363	338.8	226.582	312.608	331.079	225.9	276.85	358.331	0.167306	0.092815	0.172487	0.195004	0.113181	0.240469	0.117615	0.15318	0.17408	BE096370	1381999_at	Calmodulin regulated spectrin-associated protein 1	Rn.203213	296580	Camsap1
6.22534	6.53943	6.89735	6.10383	6.19901	6.59333	6.10428	6.48042	6.95922	74.8194	93.0175	119.209	68.7758	73.4663	96.5584	68.7973	89.2896	124.433	0.193792	0.161202	0.237587	0.133278	0.138404	0.2958	0.134456	0.106561	0.211123	AI577681	1367806_at	Glutaminase	Rn.5762	24398	Gls
9.76313	10.4469	10.3337	9.67368	10.2512	10.1282	10.0082	10.3146	10.2914	868.95	1395.82	1290.49	816.71	1218.76	1119.16	1029.84	1273.51	1253.2	0.104744	0.068071	0.077301	0.066164	0.058576	0.094196	0.123536	0.065939	0.072275	BF420770	1383627_a_at	General transcription factor IIF, polypeptide 1	Rn.98836	316123	Gtf2f1
5.63738	6.03167	6.04649	5.79143	6.24665	6.22604	5.40099	5.9104	6.09355	49.7761	65.4205	66.096	55.3853	75.9327	74.8557	42.2532	60.1461	68.2875	0.097065	0.210738	0.165589	0.150718	0.085074	0.09505	0.22139	0.132358	0.149116	BF290998	1382280_at	Ubiquinol cytochrome c reductase core protein 2	Rn.2334	293448	Uqcrc2
8.39138	8.7097	8.74961	7.97919	8.51268	8.74603	8.1133	8.54483	8.57159	335.782	418.679	430.423	252.334	365.235	429.356	276.915	373.465	380.457	0.12928	0.072237	0.07825	0.03588	0.051098	0.09136	0.097533	0.052849	0.091302	AW533496	1376536_at	Discs, large (Drosophila) homolog-associated protein 2	Rn.10705	116681	Dlgap2
7.91215	8.42257	8.29497	8.15749	8.64648	8.71535	7.77745	8.26025	8.25923	240.877	343.12	314.076	285.528	400.728	420.322	219.405	306.608	306.391	0.104222	0.083039	0.128801	0.059042	0.146055	0.142614	0.08874	0.085032	0.061823	BE117008	1378634_at	Histone deacetylase 8	Rn.208476	363481	Hdac8
6.68078	7.28895	7.22062	7.08975	7.39994	7.43116	6.65098	7.2506	7.13191	102.592	156.384	149.15	136.216	168.89	172.585	100.495	152.282	140.255	0.19662	0.048654	0.069641	0.050798	0.087913	0.093064	0.115626	0.10723	0.072511	AI176027	1378547_at	Transcribed locus	Rn.202652	-	-
3.75254	3.99029	4.17604	3.60724	3.93141	4.13698	3.51014	4.02487	4.31586	13.4781	15.8927	18.0765	12.1867	15.2571	17.5936	11.3935	16.2782	19.9161	0.06915	0.072234	0.108021	0.102761	0.081225	0.222327	0.092976	0.172858	0.189787	BF525244	1393055_at	Protein kinase N2	Rn.30325	207122	Pkn2
4.384	4.74147	5.07699	4.47386	4.64003	4.99342	4.37833	4.74377	5.09978	20.8793	26.7501	33.7541	22.2211	24.9338	31.8544	20.7974	26.7927	34.2915	0.271889	0.143131	0.259778	0.172696	0.09005	0.221618	0.150404	0.198019	0.196048	AF084205	1388002_at	TAO kinase 1	Rn.30050	286993	Taok1
8.68095	9.04434	8.94457	8.12201	8.63744	8.79335	8.42408	8.8461	9.04703	410.418	527.98	492.701	278.592	398.225	443.672	343.479	460.195	528.966	0.124913	0.043978	0.138556	0.162427	0.083784	0.097402	0.170407	0.146915	0.146519	BG381499	1389715_at	Yippee-like 4 (Drosophila)	Rn.23361	502643	Ypel4
6.25295	6.79558	6.5543	6.31552	7.00134	6.8874	6.16455	6.47047	6.61478	76.265	111.09	93.9812	79.6454	128.119	118.39	71.7323	88.6759	98.0048	0.074766	0.09151	0.022487	0.097567	0.203207	0.079621	0.172972	0.097045	0.076304	BM384812	1379301_at	Transcribed locus	Rn.28015	-	-
5.73046	5.78462	6.6586	5.55921	5.81153	6.20479	5.60575	5.85591	6.19016	53.0934	55.1244	101.027	47.1508	56.1623	73.7612	48.6966	57.9168	73.017	0.236608	0.133557	0.217751	0.083957	0.136997	0.355165	0.204947	0.178976	0.389094	BF396279	1392561_at	ATP synthase, H+ transporting, mitochondrial F1 complex, gamma polypeptide 1	-	-	-
9.66207	10.4108	10.2831	9.6763	10.17	10.095	9.9681	10.2424	10.2412	810.164	1361.33	1246.01	818.194	1152.06	1093.7	1001.61	1211.35	1210.34	0.06607	0.039269	0.088172	0.060954	0.037595	0.106849	0.118247	0.085173	0.103971	BF420770	1393106_x_at	General transcription factor IIF, polypeptide 1	Rn.98836	316123	Gtf2f1
10.0687	10.6073	10.5509	10.592	11.0141	11.0833	9.96933	10.4344	10.4497	1073.94	1559.97	1500.16	1543.51	2068.11	2169.73	1002.46	1383.78	1398.53	0.135013	0.110595	0.142977	0.151156	0.097717	0.187738	0.11904	0.08707	0.20304	BI283725	1398971_at	Similar to CG14967-PA	Rn.3552	303280	RGD1307929
4.87065	5.12299	5.4676	4.85603	4.9539	5.43292	4.54806	4.73656	5.52156	29.2558	34.8477	44.2498	28.9608	30.9936	43.1988	23.3939	26.6592	45.9362	0.200591	0.303147	0.236394	0.161881	0.162922	0.240346	0.180483	0.303081	0.257342	H32530	1397812_at	SUMO/sentrin specific peptidase 6	Rn.98553	300860	Senp6
7.86078	8.26587	8.63832	8.13292	8.37648	8.47958	7.8374	7.93735	8.68428	232.451	307.804	398.468	280.707	332.332	356.95	228.714	245.121	411.366	0.277152	0.187822	0.174644	0.130788	0.127332	0.233968	0.154314	0.2861	0.195443	BM387770	1392858_at	Similar to nuclear cap binding protein subunit 2	Rn.204538	689116	LOC689116
6.16309	6.21925	6.52002	5.29888	5.54483	6.07522	5.99482	6.51414	6.76597	71.6597	74.5042	91.7744	39.366	46.6831	67.4254	63.7706	91.4011	108.833	0.28679	0.114477	0.130973	0.118191	0.174789	0.183469	0.211728	0.160225	0.22189	BF415852	1392083_at	Exostoses (multiple) 1	Rn.106323	299907	Ext1
6.39157	6.88972	7.12899	6.82855	7.3859	7.34835	6.64505	6.86875	6.91028	83.9565	118.58	139.972	113.658	167.254	162.957	100.083	116.869	120.282	0.357391	0.09274	0.078541	0.105385	0.098036	0.202403	0.142648	0.110779	0.107595	AW526081	1374304_at	X-ray repair complementing defective repair in Chinese hamster cells 4	Rn.40979	309995	Xrcc4
9.62127	9.90357	9.89171	9.47973	10.0112	9.96021	9.25955	9.85929	9.9141	787.573	957.793	949.951	713.975	1031.98	996.144	612.918	928.842	964.809	0.210531	0.120624	0.128303	0.114213	0.078072	0.150614	0.161248	0.051353	0.15884	BI281852	1377987_at	Trafficking protein particle complex 5	Rn.162083	363858	Trappc5
3.01352	3.10962	3.5145	3.09529	3.55658	3.96741	2.97589	3.08936	3.6295	8.07532	8.63155	11.428	8.54624	11.7662	15.6426	7.86742	8.51118	12.3762	0.129822	0.039492	0.204975	0.153984	0.194848	0.290156	0.088857	0.14001	0.288085	BG379394	1378413_at	Transcribed locus	Rn.146196	-	-
9.73453	10.179	9.96739	9.67159	10.2119	10.2962	9.39483	9.84787	9.92167	851.894	1159.27	1001.11	815.528	1186.01	1257.38	673.171	921.519	969.885	0.075704	0.079584	0.100511	0.148022	0.065796	0.120563	0.171169	0.14086	0.167624	BM387902	1374004_at	Prolyl endopeptidase-like	Rn.154511	298771	Prepl
10.032	10.6215	10.9322	10.7486	10.9286	11.1679	10.4806	10.6187	10.9647	1046.97	1575.4	1953.98	1720.49	1949.11	2300.77	1428.81	1572.34	1998.5	0.401323	0.082998	0.135961	0.107349	0.095189	0.156741	0.109973	0.087004	0.13299	AI703743	1381749_at	Transcribed locus	Rn.91466	-	-
9.90143	10.2764	10.1973	10.0635	10.495	10.6821	9.59017	10.0933	10.1891	956.373	1240.24	1174.07	1070.08	1443.14	1642.98	770.777	1092.41	1167.41	0.076627	0.026762	0.07487	0.131578	0.066376	0.099115	0.13676	0.065449	0.073134	BM383803	1375061_at	Peptidylprolyl isomerase (cyclophilin)-like 4	Rn.21237	361449	Ppil4
4.40267	5.01139	5.12279	4.64169	4.82878	4.99113	4.7311	5.35664	5.00924	21.1512	32.2536	34.8428	24.9625	28.4189	31.8039	26.5585	40.9741	32.2056	0.122908	0.179637	0.105033	0.090895	0.136172	0.144302	0.155607	0.275584	0.236484	BM388810	1373863_at	Mitogen-activated protein kinase kinase kinase kinase 4	Rn.101820	301363	Map4k4
9.64288	10.3322	10.175	8.85081	9.32036	9.2133	9.71562	10.0945	10.106	799.459	1289.15	1156.06	461.699	639.305	593.581	840.801	1093.32	1102.07	0.150293	0.114904	0.16725	0.089114	0.105769	0.103416	0.130307	0.114842	0.101065	AW525194	1375987_at	Ceramide kinase	Rn.99537	300129	Cerk
4.00772	4.36334	4.74859	4.1828	4.35577	4.68853	3.99157	4.3702	4.61364	16.0858	20.5824	26.8824	18.1614	20.4747	25.7862	15.9068	20.6805	24.4818	0.099851	0.097141	0.233326	0.070162	0.222442	0.213513	0.173388	0.134349	0.365124	AA894335	1375590_at	Similar to RIKEN cDNA 5730454B08	Rn.73695	360845	RGD1308290
8.8296	9.41544	9.4941	9.01742	9.05413	9.41749	8.87404	9.22061	9.57746	454.961	682.857	721.122	518.22	531.575	683.828	469.194	596.596	764.017	0.269937	0.037334	0.054188	0.025378	0.092786	0.14831	0.083046	0.129658	0.067248	BE121436	1398495_at	Transcribed locus	Rn.219415	-	-
9.61026	10.1715	10.3727	9.72407	9.77806	10.1793	9.78469	9.87747	10.5341	781.586	1153.26	1325.85	845.74	877.99	1159.51	882.034	940.621	1482.79	0.317261	0.09881	0.247494	0.140862	0.133906	0.260084	0.138145	0.150818	0.192317	BI289608	1370169_at	Cold shock domain containing E1, RNA binding	Rn.3562	117180	Csde1
11.4699	12.0003	12.0931	11.7784	12.1316	12.2165	11.5985	11.8659	12.1912	2836.51	4096.85	4369.04	3512.79	4487.2	4759.19	3100.96	3732.43	4676.46	0.322809	0.132324	0.120536	0.153031	0.112892	0.09902	0.098739	0.111852	0.098478	BI277000	1373063_at	Ubiquitin-conjugating enzyme E2K (UBC1 homolog, yeast)	Rn.203330	289623	Ube2k
9.63991	10.1065	10.0674	9.57679	9.98349	10.0582	9.52058	9.93467	10.1494	797.815	1102.45	1072.97	763.662	1012.35	1066.15	734.48	978.664	1135.73	0.301509	0.104616	0.113383	0.098854	0.091596	0.099095	0.138403	0.095838	0.088543	BI285581	1393647_at	Histone acetyltransferase 1	Rn.139751	296501	Hat1
11.2993	11.874	11.7654	11.3567	11.9219	11.7092	11.3373	11.791	11.7427	2520.16	3753.45	3481.27	2622.45	3880.16	3348.27	2587.42	3543.6	3426.93	0.231902	0.104601	0.046288	0.095212	0.06556	0.042291	0.097538	0.114954	0.062666	AA893211	1398900_at	Dynactin 3	Rn.2038	362504	Dctn3
7.76005	8.25703	8.37115	8.63076	8.65288	8.75592	7.5737	8.26902	8.30195	216.774	305.924	331.106	396.385	402.51	432.309	190.507	308.477	315.599	0.11535	0.146713	0.117687	0.113937	0.148907	0.236017	0.087255	0.091534	0.18978	BF283340	1376669_at	Transcribed locus	Rn.166103	-	-
7.1207	7.56222	7.74417	7.36277	7.51085	7.75984	7.05515	7.50471	7.75728	139.17	188.997	214.401	164.594	182.386	216.743	132.988	181.611	216.359	0.162273	0.044912	0.102278	0.096666	0.118452	0.152246	0.165908	0.11014	0.104112	BF396192	1399100_at	Cyclin T2	Rn.21407	304758	Ccnt2
8.47877	8.99396	9.11675	8.56096	8.95421	9.16402	8.68895	8.94637	9.06705	356.75	509.861	555.156	377.664	496.005	573.647	412.7	493.317	536.357	0.373174	0.114493	0.105138	0.052922	0.068723	0.110331	0.093237	0.063331	0.087166	BF283097	1390933_a_at	RNA (guanine-9-) methyltransferase domain containing 3	Rn.204992	298081	Rg9mtd3
8.52094	9.22546	8.92413	7.81161	8.20007	8.29148	8.47209	8.8842	8.87787	367.332	598.605	485.77	224.662	294.081	313.317	355.102	472.51	470.441	0.08789	0.072188	0.148453	0.044074	0.079021	0.124311	0.139736	0.148533	0.057408	AW526333	1371832_at	Leo1, Paf1/RNA polymerase II complex component, homolog (S. cerevisiae)	Rn.43195	300837	Leo1
12.0845	12.7283	12.6885	12.4589	12.8247	12.9223	12.3132	12.5994	12.7342	4343.07	6785.78	6601.14	5629.93	7254.7	7762.47	5089.12	6205.79	6813.59	0.390105	0.134923	0.109137	0.111829	0.052653	0.12393	0.069972	0.108134	0.092772	BI296284	1398883_at	Heterogeneous nuclear ribonucleoprotein A2/B1	Rn.4057	362361	Hnrnpa2b1
8.63077	9.18877	8.8916	8.43798	9.11953	8.846	8.49923	8.95958	8.90738	396.388	583.573	474.94	346.805	556.227	460.163	361.845	497.854	480.163	0.148511	0.041959	0.067103	0.073358	0.07067	0.093017	0.130292	0.128021	0.052707	NM_031656	1368070_at	Syntaxin 8	Rn.20291	59074	Stx8
6.97111	7.36871	7.24725	7.05161	7.57099	7.80002	6.91166	7.3531	7.29502	125.462	165.273	151.929	132.662	190.149	222.864	120.397	163.495	157.043	0.104734	0.165692	0.090653	0.089051	0.091828	0.117971	0.092883	0.133972	0.117653	AI548194	1394895_at	Abelson helper integration site 1	Rn.205875	308923	Ahi1
8.17936	8.73528	8.60422	8.19176	8.62146	8.80381	8.20533	8.54315	8.63461	289.89	426.168	389.16	292.392	393.838	446.901	295.155	373.031	397.445	0.160012	0.098569	0.084414	0.122909	0.063352	0.10606	0.120422	0.082015	0.076631	BI275419	1393062_at	Transcribed locus	Rn.14752	-	-
4.8522	5.21878	5.4884	4.73325	4.98689	5.1361	4.98112	5.19568	5.81192	28.884	37.24	44.8924	26.5981	31.7105	35.1658	31.584	36.6484	56.1775	0.133046	0.261665	0.128561	0.157177	0.130681	0.208414	0.176846	0.297506	0.13048	AI044494	1380978_at	Transcribed locus	Rn.147477	-	-
8.40717	9.09179	9.2105	8.66174	9.01742	9.05305	8.85801	8.93964	9.23028	339.477	545.634	592.43	404.989	518.22	531.177	464.009	491.021	600.608	0.317032	0.10798	0.140872	0.047548	0.160074	0.111393	0.114521	0.126943	0.201664	NM_017187	1367676_at	High mobility group box 2	Rn.2874	29395	Hmgb2
8.48514	9.31985	9.23966	8.79156	8.91208	9.04999	8.86469	9.25555	9.15832	358.329	639.079	604.526	443.122	481.73	530.052	466.163	611.221	571.385	0.116832	0.1011	0.093364	0.100298	0.143047	0.110922	0.109902	0.103318	0.081597	BF394739	1394390_at	Transcribed locus	Rn.51029	-	-
9.78231	10.1323	9.96538	9.22676	10.0602	9.8426	9.64878	10.073	9.94034	880.58	1122.34	999.72	599.144	1067.63	918.159	802.735	1077.15	982.518	0.062633	0.078551	0.090143	0.144392	0.083328	0.083033	0.131618	0.092416	0.07953	BE100843	1374297_at	Dynein cytoplasmic 1 light intermediate chain 1	Rn.2064	252902	Dync1li1
8.42597	8.86734	8.90522	8.30533	8.77094	8.91369	8.39007	8.70723	8.86031	343.93	467.02	479.444	316.34	436.834	482.268	335.477	417.963	464.75	0.214183	0.051675	0.05933	0.096422	0.03567	0.177207	0.11224	0.040554	0.022299	BI289683	1372145_at	Threonyl-tRNA synthetase	Rn.22757	294810	Tars
6.88007	7.06696	7.41609	6.96218	7.40764	7.69028	6.8073	6.88509	7.50425	117.79	134.081	170.791	124.688	169.794	206.54	111.996	118.2	181.553	0.135724	0.194488	0.33686	0.10904	0.151964	0.260844	0.181181	0.090953	0.253386	NM_053718	1368279_at	Myeloid/lymphoid or mixed-lineage leukemia (trithorax homolog, Drosophila); translocated to, 3	Rn.22828	114510	Mllt3
11.3769	11.9635	11.6056	10.5507	11.2	10.8311	11.2543	11.7598	11.7455	2659.43	3993.67	3116.26	1499.95	2352.53	1821.74	2442.77	3467.79	3433.59	0.246869	0.053753	0.09858	0.09253	0.069916	0.125913	0.118846	0.071879	0.094342	AF026530	1370315_a_at	Stathmin-like 4	Rn.5658	79423	Stmn4
11.5927	12.1499	12.0364	11.481	11.936	11.9773	11.6087	12.0149	12.0343	3088.52	4544.48	4200.66	2858.42	3918.27	4032.06	3122.96	4138.52	4194.55	0.286147	0.044183	0.090797	0.102011	0.056892	0.090819	0.121363	0.055213	0.058333	AA849757	1371693_at	Similar to AHA1, activator of heat shock 90kDa protein ATPase homolog 1	Rn.216448	681996	LOC681996
6.59802	7.13133	7.0102	6.29441	6.81185	6.63682	6.591	7.01123	7.13996	96.8728	140.199	128.908	78.4885	112.35	99.5135	96.4026	129	141.04	0.106594	0.075162	0.132867	0.100366	0.060431	0.170635	0.141867	0.132795	0.141615	BM392010	1373293_at	Large subunit GTPase 1 homolog (S. cerevisiae)	Rn.41256	288029	Lsg1
5.12135	5.29272	5.34783	5.12483	5.5813	6.03993	4.95436	5.11839	5.63487	34.8081	39.1983	40.7246	34.8921	47.8783	65.7961	31.0035	34.7367	49.6895	0.147119	0.077815	0.221874	0.149046	0.132408	0.295733	0.149217	0.178494	0.169193	AF053361	1371239_s_at	Tropomyosin 3, gamma	Rn.37575	117557	Tpm3
5.44601	6.04845	5.75853	5.93793	6.39033	6.50195	5.44327	5.84682	5.87268	43.5926	66.1858	54.1365	61.3049	83.8844	90.6321	43.5098	57.553	58.594	0.356157	0.055828	0.17575	0.108968	0.081751	0.083234	0.132626	0.140247	0.077567	AA858886	1373138_at	Nudix (nucleoside diphosphate linked moiety X)-type motif 5	Rn.55388	361274	Nudt5
9.6991	10.4211	10.1984	9.99368	10.3617	10.4535	9.81221	10.0925	10.2267	831.228	1371.08	1174.96	1019.52	1315.78	1402.22	899.02	1091.81	1198.24	0.314536	0.073271	0.14632	0.142515	0.075345	0.084094	0.130303	0.113806	0.110778	BI290791	1368031_at	Nucleolar and coiled-body phosphoprotein 1	Rn.9517	64896	Nolc1
8.96376	9.52616	9.37857	8.18425	8.6142	8.51351	8.8927	9.42456	9.39238	499.299	737.327	665.627	290.874	391.861	365.445	475.302	687.188	672.029	0.265832	0.127802	0.155815	0.115224	0.061207	0.107018	0.125208	0.117134	0.079439	NM_013186	1368242_at	Potassium voltage gated channel, Shab-related subfamily, member 1	Rn.26724	25736	Kcnb1
11.7005	12.2583	12.2188	11.9041	12.417	12.3464	11.8542	12.2434	12.2007	3328.14	4899.1	4766.78	3832.58	5468.77	5207.59	3702.28	4848.76	4707.35	0.323037	0.119204	0.108167	0.149547	0.08851	0.083901	0.163065	0.1206	0.102925	BI276424	1388365_at	ATPase, H+ transporting, lysosomal 38kDa, V0 subunit d1	Rn.94752	291969	Atp6v0d1
10.8413	11.4049	11.2629	10.5824	11.0097	11.0788	10.8104	11.292	11.1903	1834.66	2711.55	2457.37	1533.27	2061.82	2162.97	1795.79	2507.44	2336.77	0.260809	0.047939	0.164732	0.164567	0.064824	0.177302	0.147452	0.083004	0.134903	BF283599	1372580_at	MAP-kinase activating death domain	Rn.90117	94193	Madd
7.81942	8.45607	8.28058	8.07234	8.43223	8.41079	7.87755	8.35809	8.35871	225.881	351.181	310.959	269.164	345.425	340.33	235.168	328.122	328.263	0.183941	0.076706	0.172687	0.103009	0.097915	0.088789	0.102519	0.072983	0.132774	BI277767	1383505_at	Transcribed locus	Rn.25271	-	-
4.80265	5.29563	5.76283	5.24269	5.38276	5.54633	5.16028	5.40379	5.63836	27.9088	39.2775	54.2981	37.8623	41.7227	46.7317	35.7601	42.3353	49.8099	0.116552	0.116691	0.132589	0.103241	0.143846	0.156632	0.180824	0.175908	0.256412	BG664080	1393171_at	Similar to transmembrane 4 superfamily member 10	Rn.16447	501569	RGD1564799
7.23511	7.82134	7.66106	7.06227	7.61917	7.61474	7.31103	7.55424	7.68855	150.656	226.182	202.399	133.646	196.607	196.004	158.796	187.955	206.293	0.199077	0.060612	0.075422	0.103419	0.04119	0.094268	0.119349	0.125574	0.093053	BI295806	1376079_at	Transcribed locus, strongly similar to NP_031895.1 DnaJ (Hsp40) homolog, subfamily C, member 1 [Mus musculus]	Rn.40786	-	-
7.45824	7.85418	7.82269	7.28366	7.69484	7.64234	7.23396	7.86106	7.81944	175.855	231.39	226.394	155.812	207.194	199.79	150.536	232.496	225.884	0.251522	0.103693	0.102478	0.174866	0.112718	0.150086	0.193046	0.111453	0.118196	AW435010	1376537_at	Protein tyrosine phosphatase, non-receptor type 3	Rn.22271	362524	Ptpn3
10.5181	11.3482	10.986	10.6276	11.2113	10.7871	10.8129	11.2317	11.0104	1466.44	2607.05	2028.22	1582.07	2371.03	1767.02	1798.9	2404.8	2062.82	0.301558	0.049608	0.073882	0.059831	0.05365	0.114049	0.106414	0.083746	0.024643	BF283001	1399047_at	Mitochondrial ribosomal protein L27	Rn.18445	287635	Mrpl27
7.5706	8.1403	7.77485	6.98283	7.68453	7.25482	7.34935	8.04052	7.57882	190.098	282.146	219.01	126.486	205.719	152.728	163.07	263.292	191.184	0.249548	0.088187	0.073305	0.121892	0.066466	0.193433	0.101948	0.070339	0.078486	BF408740	1374740_at	Similar to K11B4.2	Rn.27139	688966	LOC688966
7.17482	7.43711	7.58141	7.06557	7.46207	7.62463	6.93522	7.37049	7.60199	144.489	173.298	191.528	133.952	176.322	197.352	122.38	165.477	194.28	0.120766	0.059476	0.138464	0.11015	0.101078	0.143771	0.131164	0.105106	0.060608	BE114414	1385595_at	Antigenic determinant of rec-A protein	Rn.53701	689197	Kin
10.4634	11.1988	11.2523	12.8635	13.1396	13.2299	10.983	11.1812	11.2613	1411.88	2350.58	2439.38	7452.45	9024.3	9607.2	2024.01	2322.08	2454.65	0.182025	0.087211	0.166247	0.105674	0.091194	0.071987	0.199186	0.211093	0.154252	NM_030832	1370024_at	Fatty acid binding protein 7, brain	Rn.10014	80841	Fabp7
11.5711	12.104	11.8624	11.4126	12.0715	11.8508	11.5091	11.9612	11.8643	3042.62	4402.17	3723.39	2726.06	4304.11	3693.57	2914.64	3987.31	3728.29	0.098473	0.083876	0.127883	0.132763	0.079394	0.07056	0.132884	0.126365	0.167274	BI281756	1368653_a_at	Parkinson disease (autosomal recessive, early onset) 7	Rn.30105	117287	Park7
8.32517	8.60524	8.78356	8.34288	8.95486	8.85452	8.21447	8.59159	8.70873	320.72	389.435	440.672	324.681	496.228	462.888	297.031	385.768	418.397	0.068786	0.121614	0.131682	0.110542	0.084697	0.113714	0.124657	0.10521	0.134851	BF282816	1373073_at	Protein phosphatase 1, regulatory (inhibitor) subunit 7	Rn.19437	301618	Ppp1r7
5.61373	5.91008	6.26977	5.75024	5.8774	6.22339	5.54169	5.97216	6.23121	48.9667	60.1328	77.1594	53.8263	58.786	74.7183	46.5817	62.7768	75.1244	0.176193	0.100558	0.163841	0.118634	0.125731	0.170432	0.085436	0.046136	0.198355	AI009813	1382884_at	Transcribed locus, strongly similar to NP_001014218.1 protein phosphatase 2, regulatory subunit B'', gamma [Rattus norvegicus	Rn.199248	-	-
9.24823	9.72939	9.75948	9.35369	9.68855	9.85377	9.23359	9.51794	9.84705	608.127	848.864	866.755	654.246	825.171	925.295	601.988	733.138	920.995	0.183763	0.108566	0.096124	0.040517	0.043014	0.057189	0.067924	0.133124	0.065696	BI291418	1372675_at	Similar to RIKEN cDNA 1110004E09	Rn.24386	288269	RGD1306954
7.52847	7.99578	7.94916	7.7346	8.08159	8.21798	7.38625	7.8413	7.95178	184.627	255.252	247.136	212.984	270.895	297.755	167.295	229.333	247.585	0.18892	0.085054	0.190989	0.145542	0.110831	0.169107	0.189559	0.096748	0.120395	BF393872	1382897_at	Similar to mKIAA1461 protein	Rn.91553	311026	LOC311026
6.24778	6.77415	6.69189	6.61882	7.26539	6.92391	6.28882	6.74413	6.6308	75.9922	109.452	103.385	98.2796	153.851	121.424	78.185	107.198	99.0991	0.179401	0.154232	0.141453	0.17834	0.15664	0.200167	0.126621	0.206305	0.205746	NM_017033	1369473_at	Phosphoglucomutase 1	Rn.9970	24645	Pgm1
8.33125	9.07925	8.74679	8.10735	8.7887	8.24569	8.57173	9.09834	8.67435	322.074	540.912	429.582	275.775	442.244	303.529	380.494	548.117	408.545	0.108688	0.034712	0.063311	0.081599	0.06316	0.104165	0.0988	0.061547	0.05542	BM385251	1373965_at	Coiled-coil domain containing 124	Rn.14668	290642	Ccdc124
9.15709	9.69653	9.58586	9.171	9.51433	9.70876	9.22828	9.68627	9.64142	570.898	829.748	768.478	576.429	731.305	836.812	599.776	823.868	798.65	0.283167	0.072502	0.094616	0.055831	0.044802	0.098274	0.058582	0.05634	0.071606	BG371654	1394038_at	Intraflagellar transport 81 homolog (Chlamydomonas)	Rn.47911	373066	Ift81
7.45425	7.92032	7.68644	6.8859	7.5699	7.49719	7.47361	7.89342	7.73079	175.369	242.244	205.991	118.267	190.006	180.667	177.738	237.77	212.422	0.110702	0.105802	0.102027	0.069821	0.033929	0.101758	0.105027	0.092282	0.079637	AI406571	1389445_at	Zinc finger protein 688	Rn.29826	293511	Znf688
7.65698	8.17297	8.01716	7.3227	7.78398	7.74515	7.61342	8.12135	8.06693	201.828	288.609	259.063	160.086	220.4	214.547	195.825	278.465	268.156	0.13718	0.06469	0.108108	0.099135	0.060947	0.18306	0.093044	0.067543	0.157649	BG380281	1371923_at	Lysophosphatidylcholine acyltransferase 1	Rn.16547	361467	Lpcat1
7.26754	7.55935	7.46913	6.88569	7.42875	7.37132	6.88072	7.29218	7.6107	154.08	188.621	177.187	118.249	172.297	165.573	117.843	156.735	195.456	0.135332	0.117226	0.096796	0.085967	0.087889	0.14589	0.104117	0.187494	0.081009	AI136699	1385553_at	Similar to nuclear cap binding protein subunit 2	Rn.204538	689116	LOC689116
9.49734	10.0113	9.90895	9.33569	9.87566	9.81843	9.50378	9.88367	9.89136	722.744	1032.05	961.371	646.134	939.442	902.905	725.977	944.672	949.721	0.211193	0.110421	0.125734	0.144513	0.091523	0.113574	0.158085	0.156712	0.138169	AI412102	1371962_at	Tu translation elongation factor, mitochondrial	Rn.48850	293481	Tufm
8.09361	8.61459	8.48599	8.05835	8.52494	8.50302	8.02249	8.52629	8.41259	273.161	391.967	358.54	266.566	368.352	362.797	260.022	368.697	340.755	0.273728	0.059212	0.086433	0.13157	0.059177	0.106297	0.144546	0.062837	0.123703	BM389027	1389089_at	Solute carrier family 39 (zinc transporter), member 7	Rn.103977	294281	Slc39a7
3.8579	3.96186	4.53327	3.39779	3.52636	4.12163	3.4001	3.63319	4.10212	14.4992	15.5826	23.1553	10.5399	11.5223	17.4074	10.5568	12.4079	17.1736	0.260723	0.227974	0.26883	0.058428	0.149715	0.328606	0.13242	0.155112	0.319646	BF400826	1395487_at	Transcribed locus	Rn.48058	-	-
10.9872	11.6367	11.5421	11.2197	11.648	11.4642	11.2048	11.6626	11.5532	2029.91	3184.17	2982.07	2384.88	3209.2	2825.32	2360.37	3241.85	3005.11	0.220911	0.076658	0.103787	0.092148	0.078787	0.166198	0.115642	0.048708	0.039876	AA874811	1387887_at	ribosomal protein L14	-	-	-
4.76527	5.24179	5.11897	4.93955	5.28744	5.51219	4.78241	5.18039	5.33179	27.195	37.8387	34.7507	30.6869	39.0551	45.6388	27.52	36.2621	40.2744	0.168889	0.048751	0.124867	0.128974	0.060948	0.149515	0.066225	0.199897	0.10511	BI293317	1395387_at	Intraflagellar transport 81 homolog (Chlamydomonas)	Rn.47911	373066	Ift81
6.54742	7.02159	6.94208	6.3499	6.90593	6.8893	6.43965	6.69736	6.91188	93.5341	129.93	122.963	81.5662	119.92	118.546	86.8016	103.778	120.416	0.163135	0.092527	0.174507	0.147727	0.087211	0.207187	0.191749	0.193308	0.161767	BF565188	1386669_at	Transcribed locus, strongly similar to NP_955518.1 ribosomal RNA processing 12 homolog [Mus musculus]	Rn.216740	-	-
8.05402	8.42416	8.1663	7.58567	8.12299	8.11737	7.63957	8.24364	8.14433	265.767	343.499	287.277	192.094	278.781	277.697	199.407	303.098	282.936	0.071405	0.059601	0.082836	0.079	0.06324	0.064398	0.205984	0.059998	0.06678	BI294346	1394438_at	ARP1 actin-related protein 1 homolog A, centractin alpha (yeast)	Rn.32312	294010	Actr1a
8.86762	9.43991	9.34631	9.77074	10.2611	10.1927	9.06879	9.35767	9.51251	467.11	694.538	650.908	873.546	1227.15	1170.33	537.004	656.054	730.383	0.288892	0.137678	0.148297	0.143022	0.142617	0.164289	0.062758	0.096087	0.146926	AW433875	1388528_at	Fibrillarin	Rn.98803	292747	Fbl
9.20852	9.69348	9.53159	8.84524	9.50092	9.28458	9.21592	9.72562	9.47377	591.617	827.996	740.107	459.92	724.539	623.644	594.659	846.649	711.032	0.196966	0.091151	0.068331	0.088302	0.068348	0.083829	0.11337	0.079334	0.093093	AI007987	1398996_at	Similar to AP-3 complex subunit sigma-2 (Adapter-related protein complex 3 sigma-2 subunit) (Sigma-adaptin 3b) (AP-3 complex	Rn.3618	683402	LOC683402
10.4217	11.0316	10.7846	9.82829	10.3064	10.1895	10.3931	10.8825	10.7779	1371.65	2093.35	1763.96	909.097	1266.3	1167.74	1344.73	1887.81	1755.78	0.283649	0.040404	0.03746	0.095622	0.080616	0.056261	0.112476	0.059381	0.068886	AA891759	1372059_at	Similar to RIKEN cDNA 2610528E23	Rn.3487	288176	RGD1309437
5.45345	6.12052	5.94457	5.99232	6.46511	6.28618	5.72893	6.27046	5.91018	43.8179	69.5761	61.5877	63.6602	88.347	78.0421	53.0371	77.1963	60.137	0.103464	0.076701	0.086979	0.119834	0.061758	0.050209	0.078124	0.164503	0.071582	BF414509	1383430_at	TRNA splicing endonuclease 2 homolog (S. cerevisiae)	Rn.206216	312649	Tsen2
8.07116	8.11993	8.52518	7.39193	7.91643	8.21105	8.21365	8.37352	8.76563	268.944	278.191	368.413	167.955	241.592	296.328	296.862	331.651	435.229	0.276635	0.173026	0.194357	0.154542	0.102318	0.221119	0.185146	0.116079	0.196746	AF286167	1370465_at	ATP-binding cassette, sub-family B (MDR/TAP), member 1	Rn.154810	170913	Abcb1
6.98762	7.54165	7.15383	6.64155	7.25778	7.09743	6.83554	7.27554	7.25114	126.906	186.321	142.402	99.8403	153.042	136.943	114.21	154.937	152.339	0.118138	0.041158	0.046171	0.105842	0.080065	0.059503	0.137668	0.15118	0.07443	AW435213	1372402_at	N-acetylneuraminic acid synthase	Rn.17006	298071	Nans
8.17494	8.67944	8.71531	8.05537	8.4119	8.56034	8.27715	8.51058	8.79993	289.003	409.989	420.31	266.016	340.592	377.502	310.22	364.703	445.7	0.1601	0.030646	0.063234	0.046098	0.051543	0.057237	0.040909	0.044293	0.052508	BI298225	1398384_at	Exosome component 9	Rn.13826	294975	Exosc9
5.40301	6.19204	6.03258	6.11382	6.70589	6.46813	5.88627	6.06553	5.86265	42.3124	73.1122	65.4617	69.2537	104.394	88.5322	59.1485	66.974	58.188	0.101564	0.153023	0.12191	0.11586	0.088283	0.094716	0.102385	0.121772	0.116718	BF521655	1385670_at	Serine dehydratase-like	Rn.54338	360816	Sdsl
3.95626	4.05649	4.52791	4.37501	4.63853	5.12599	3.61646	3.68893	4.36561	15.5222	16.6389	23.0694	20.7496	24.9079	34.9202	12.2649	12.8967	20.6148	0.111509	0.114581	0.273927	0.160893	0.272994	0.353973	0.105008	0.211809	0.266303	AW526712	1382268_at	A kinase (PRKA) anchor protein 13	Rn.2027	293024	Akap13
10.2094	10.9399	10.7582	11.1572	11.5351	11.4029	10.4903	10.8306	10.8689	1183.96	1964.44	1731.97	2283.77	2967.64	2707.79	1438.45	1821.11	1870.1	0.38628	0.057975	0.055454	0.043664	0.056752	0.109068	0.123768	0.118506	0.069318	AW252650	1388358_at	Electron-transfer-flavoprotein, beta polypeptide	Rn.60152	292845	Etfb
8.33052	8.71529	8.59635	8.08352	8.61312	8.46672	8.09816	8.70309	8.56933	321.911	420.304	387.043	271.258	391.568	353.783	274.024	416.765	379.862	0.122449	0.186548	0.156507	0.096841	0.052284	0.116176	0.100938	0.117597	0.15003	BI285247	1388514_at	Protein phosphatase 1G (formerly 2C), magnesium-dependent, gamma isoform	Rn.16969	259229	Ppm1g
9.33753	9.76526	9.65836	9.04018	9.57863	9.55813	9.27674	9.68825	9.71057	646.959	870.234	808.083	526.46	764.636	753.848	620.265	825	837.863	0.117956	0.100397	0.036967	0.04928	0.070788	0.05937	0.090134	0.067715	0.042771	BM385109	1370906_at	Branched chain keto acid dehydrogenase E1, beta polypeptide	Rn.15623	29711	Bckdhb
3.2267	3.75449	3.84363	3.1016	3.47185	3.37498	3.06997	3.71229	3.23595	9.36124	13.4963	14.3565	8.5837	11.0951	10.3746	8.39756	13.1072	9.42146	0.103109	0.176382	0.236272	0.039454	0.138155	0.148985	0.028909	0.247386	0.08597	H31800	1397675_at	Eukaryotic translation initiation factor 4H	Rn.79423	288599	Eif4h
10.3749	10.9511	10.9139	10.5431	10.8401	10.9397	10.4405	10.7717	10.9353	1327.87	1979.75	1929.35	1492.07	1833.14	1964.16	1389.64	1748.26	1958.18	0.319265	0.038695	0.09278	0.093066	0.041325	0.090649	0.10109	0.106246	0.088782	AI144583	1388965_at	Protein phosphatase 2, regulatory subunit B', epsilon isoform	Rn.24394	299147	Ppp2r5e
4.62585	5.05207	5.02344	4.72147	5.19504	5.13869	4.55912	5.02644	5.02573	24.6899	33.176	32.5242	26.3818	36.6322	35.229	23.5739	32.5919	32.5758	0.138916	0.119381	0.212736	0.117924	0.074586	0.133878	0.122487	0.069097	0.213475	AW529599	1395832_at	Transcribed locus	Rn.47253	-	-
4.96627	5.48072	5.47663	4.92431	5.40882	5.39955	5.06563	5.40176	5.38014	31.2605	44.6541	44.5277	30.3644	42.4832	42.2111	33.4893	42.2758	41.647	0.108761	0.110738	0.072133	0.08624	0.088581	0.126018	0.08203	0.099497	0.068151	AI177835	1379665_at	Peptidylprolyl isomerase domain and WD repeat containing 1	Rn.144258	294711	Ppwd1
9.13736	9.66696	9.46018	8.73224	9.22526	9.1831	9.08562	9.55885	9.45416	563.144	812.915	704.365	425.271	598.522	581.284	543.306	754.224	701.432	0.071919	0.091049	0.067766	0.029336	0.056422	0.069511	0.115919	0.091644	0.070892	BI283124	1371718_at	Steroid receptor RNA activator 1	Rn.29904	252891	Sra1
5.45753	5.65299	5.7293	5.33291	6.01238	6.00764	5.24617	5.59841	5.64624	43.942	50.3176	53.0507	40.3056	64.5516	64.3398	37.9537	48.4495	50.0827	0.123581	0.071363	0.049729	0.159407	0.102193	0.188745	0.151547	0.196259	0.082717	BF410571	1389512_at	Transcribed locus	Rn.199834	-	-
12.3931	12.938	12.8296	11.9164	12.297	12.3217	12.3947	12.8427	12.8209	5378.92	7847.41	7279.38	3865.39	5032.29	5119.19	5384.89	7345.78	7235.62	0.253519	0.072608	0.14096	0.113286	0.068023	0.090032	0.099277	0.066407	0.121986	BM389769	1372182_at	Phosphofructokinase, platelet	Rn.2278	60416	Pfkp
7.35197	7.77745	7.87436	7.43261	7.81619	7.97452	7.35592	7.5858	7.87389	163.367	219.405	234.649	172.758	225.376	251.518	163.815	192.111	234.572	0.08647	0.064827	0.093298	0.072543	0.063258	0.138454	0.110831	0.080426	0.0438	BF416387	1374738_at	Serologically defined colon cancer antigen 10	Rn.153577	361887	Sdccag10
6.45122	6.727	6.93454	6.04108	6.48304	6.57342	6.31588	6.71929	6.81	87.5005	105.932	122.322	65.8486	89.4519	95.235	79.6653	105.368	112.206	0.068704	0.078019	0.059032	0.104633	0.079986	0.112915	0.080537	0.152874	0.123479	AI576427	1383839_at	Spastic paraplegia 20, spartin (Troyer syndrome) homolog (human)	Rn.7964	295053	Spg20
5.24672	5.87673	5.66361	4.80933	5.33913	5.27948	5.30892	5.55742	5.62213	37.9682	58.7587	50.6893	28.0384	40.4798	38.8402	39.641	47.0923	49.2527	0.143698	0.135031	0.188941	0.139118	0.064551	0.170116	0.131689	0.084137	0.203344	BF408149	1394433_at	Katanin p60 subunit A-like 1	Rn.208215	288449	Katnal1
3.945	4.20647	4.33007	3.6032	3.93458	4.0231	3.67365	4.08812	4.44614	15.4015	18.4618	20.1132	12.1527	15.2907	16.2582	12.7608	17.0077	21.7982	0.142479	0.127899	0.184396	0.146054	0.087304	0.160706	0.156576	0.148043	0.273148	BE095772	1378431_at	SFRS protein kinase 2	Rn.138055	296753	Srpk2
7.52248	8.07169	7.96215	7.36003	7.91805	7.85619	7.69712	8.00431	7.9612	183.862	269.042	249.371	164.282	241.864	231.712	207.522	256.766	249.207	0.226051	0.072139	0.098481	0.088867	0.081408	0.041506	0.104217	0.111327	0.189302	AI104068	1371397_at	Nitric oxide synthase interacting protein	Rn.146210	292894	Nosip
8.3594	8.95386	8.78824	8.41977	8.86929	8.95572	8.49081	8.81368	8.7754	328.42	495.884	442.103	342.455	467.651	496.524	359.74	449.968	438.186	0.269979	0.056678	0.074235	0.047172	0.089785	0.067601	0.102022	0.104895	0.046301	BM386954	1377126_at	COMM domain containing 7	Rn.92689	296285	Commd7
9.49282	9.66455	9.58732	9.88966	10.3553	10.5945	9.09599	9.497	9.78375	720.483	811.558	769.256	948.603	1309.95	1546.19	547.225	722.573	881.459	0.142661	0.103038	0.149513	0.240449	0.131307	0.249715	0.092048	0.075581	0.106009	AI576252	1374859_at	ESTs	-	-	-
6.11116	6.77863	6.27911	8.30486	9.25058	8.49005	6.35761	6.82613	6.3249	69.1262	109.792	77.6605	316.236	609.119	359.55	82.0033	113.467	80.165	0.189505	0.078271	0.130923	0.121033	0.170713	0.248479	0.11028	0.154689	0.170342	BI278379	1373128_at	Reticulocalbin 3, EF-hand calcium binding domain	Rn.2997	494125	Rcn3
9.03352	9.60086	9.37782	9.01947	9.47572	9.27253	8.997	9.43667	9.54053	524.035	776.51	665.281	518.957	711.993	618.457	510.936	692.98	744.707	0.132968	0.047846	0.089844	0.0899	0.069313	0.086199	0.136464	0.063069	0.131234	AI408025	1372119_at	Ubiquitin-like modifier activating enzyme 5	Rn.18210	300968	Uba5
9.05454	9.44314	9.16662	8.41121	9.04656	8.8701	8.7745	9.38165	9.13659	531.726	696.095	574.682	340.429	528.793	467.914	437.913	667.049	562.843	0.158363	0.092984	0.181642	0.118014	0.109404	0.088037	0.170109	0.133654	0.138957	BI278468	1375441_at	Seryl-tRNA synthetase	Rn.73067	266975	Sars
6.73408	7.08924	7.14493	6.88451	7.49624	7.3977	6.71444	6.99155	7.14071	106.454	136.168	141.527	118.153	180.548	168.628	105.014	127.252	141.113	0.074325	0.115834	0.094257	0.177212	0.0966	0.134892	0.121958	0.154276	0.137518	BM386224	1373732_at	Acid phosphatase 6, lysophosphatidic	Rn.103296	295305	Acp6
6.28061	6.4067	7.14314	6.50431	6.56771	7.32999	6.61028	6.30814	7.26804	77.7413	84.8416	141.351	90.7805	94.8588	160.897	97.6995	79.2391	154.134	0.177529	0.192026	0.178191	0.06376	0.107753	0.157206	0.089668	0.090535	0.13721	BF548480	1377413_at	Transcribed locus	Rn.163733	-	-
7.00382	7.47332	7.70999	7.03265	7.11487	7.25362	7.02635	7.32058	7.74593	128.339	177.702	209.381	130.93	138.608	152.601	130.359	159.851	214.663	0.161409	0.084002	0.102231	0.111001	0.12677	0.0925	0.161609	0.074883	0.154967	BF406915	1383239_at	Zinc finger, CCHC domain containing 7	Rn.56971	298086	Zcchc7
9.68388	10.4487	10.1743	9.79933	10.0605	9.98517	9.8386	10.3407	10.1664	822.505	1397.57	1155.5	891.03	1067.85	1013.53	915.617	1296.76	1149.19	0.086494	0.114388	0.15499	0.14728	0.186835	0.170128	0.166684	0.143448	0.139905	AW919608	1392541_at	Transcribed locus, strongly similar to XP_001061141.1 PREDICTED: similar to C44B7.7 [Rattus norvegicus]	Rn.219385	-	-
4.94652	5.27559	5.30492	4.89507	5.28412	5.4162	4.8035	5.15075	5.43661	30.8355	38.7356	39.5312	29.7552	38.9654	42.7011	27.9253	35.5247	43.3095	0.14153	0.114809	0.097697	0.15521	0.101274	0.099434	0.127708	0.074874	0.134208	BF562920	1394604_at	Transcribed locus	Rn.206117	-	-
9.82225	10.1565	10.2457	9.62655	10.0181	10.1749	9.75702	10.0721	10.3275	905.299	1141.33	1214.12	790.461	1036.93	1155.98	865.278	1076.48	1284.95	0.277697	0.110327	0.076407	0.070432	0.038398	0.083931	0.081446	0.050621	0.057341	AA996974	1399114_at	General transcription factor IIE, polypeptide 2, beta	Rn.103659	306516	Gtf2e2
9.77239	10.1072	10.167	9.67096	10.0721	10.205	9.68497	10.0025	10.2826	874.546	1102.99	1149.67	815.172	1076.48	1180.35	823.126	1025.78	1245.58	0.122233	0.106141	0.076648	0.093153	0.113605	0.112434	0.101083	0.051474	0.099063	NM_019187	1367818_at	Coenzyme Q3 homolog, methyltransferase (S. cerevisiae)	Rn.3824	29309	Coq3
7.10843	7.69077	7.55716	7.01939	7.43063	7.27312	7.20293	7.55686	7.72377	137.991	206.611	188.335	129.732	172.521	154.678	147.332	188.296	211.391	0.211376	0.123807	0.0352	0.060477	0.071848	0.048865	0.097944	0.089342	0.061005	AF120100	1370821_at	Thiopurine S-methyltransferase	Rn.112598	690050	Tpmt
8.21507	8.87955	9.04579	9.86067	10.0792	10.2753	8.63377	8.70277	8.87992	297.155	470.989	528.511	929.731	1081.79	1239.29	397.213	416.672	471.11	0.150059	0.106485	0.146848	0.07995	0.119154	0.144885	0.175013	0.111309	0.144128	BE108745	1373433_at	Nucleosomal binding protein 1	Rn.25395	681284	Nsbp1
3.73194	3.76696	4.41155	3.95891	4.25157	4.57435	3.68425	3.56848	4.52324	13.287	13.6134	21.2818	15.5507	19.048	23.8241	12.8549	11.8637	22.9949	0.19031	0.118107	0.325191	0.216445	0.227925	0.349527	0.17883	0.188892	0.309328	AW527582	1391294_at	Transmembrane and coiled-coil domain family 1	Rn.198698	312654	Tmcc1
6.71249	7.11219	7.08306	6.20315	6.51623	6.89873	6.5108	6.76881	7.02174	104.872	138.351	135.586	73.6774	91.5336	119.323	91.1898	109.047	129.943	0.111143	0.096752	0.152966	0.306209	0.07051	0.101873	0.138117	0.093505	0.11862	BM385501	1394636_at	Transcribed locus	Rn.177629	-	-
8.66487	8.82567	8.70434	8.15164	8.86895	8.78692	8.30268	8.85784	8.66102	405.869	453.724	417.126	284.373	467.541	441.699	315.759	463.955	404.787	0.173416	0.046716	0.121332	0.144542	0.107745	0.126233	0.168574	0.097695	0.142112	BI294695	1374301_at	Component of oligomeric golgi complex 1	Rn.163170	303652	Cog1
9.12847	9.62535	9.47808	8.86573	9.36435	9.29646	9.00432	9.39674	9.41777	559.685	789.804	713.159	466.499	659.098	628.801	513.535	674.063	683.961	0.265751	0.053863	0.121186	0.136021	0.068301	0.139864	0.107474	0.111284	0.11958	BI294727	1373500_at	Leucine-rich PPR-motif containing	Rn.92051	313867	Lrpprc
5.44464	5.94358	5.91326	5.33227	5.81527	6.00407	5.59981	5.82329	5.77745	43.5512	61.5454	60.2655	40.2878	56.3081	64.1808	48.4965	56.622	54.8512	0.19323	0.082028	0.145072	0.124692	0.11762	0.199424	0.140556	0.121718	0.105658	NM_013029	1387435_at	ST8 alpha-N-acetyl-neuraminide alpha-2,8-sialyltransferase 3	Rn.90977	25547	St8sia3
7.47167	7.85388	7.72117	7.13188	7.6798	7.73236	7.249	7.70544	7.56265	177.499	231.341	211.01	140.252	205.045	212.653	152.113	208.722	189.053	0.116839	0.037311	0.104268	0.144427	0.078183	0.145698	0.13138	0.088819	0.156189	AI072446	1389507_at	Neural precursor cell expressed, developmentally down-regulated 4-like	Rn.72824	291553	Nedd4l
9.02359	9.73838	9.36804	9.40672	10.1403	9.48591	9.16031	9.55724	9.34643	520.441	854.17	660.786	678.742	1128.59	717.04	572.174	753.383	650.962	0.145267	0.079747	0.196322	0.101957	0.053107	0.088559	0.141425	0.131871	0.235137	AW525691	1398929_at	Eukaryotic translation initiation factor 3, subunit 6 interacting protein	Rn.22102	300069	Eif3s6ip
9.36483	9.75428	9.6471	9.33903	9.83885	9.80232	9.22915	9.63492	9.75505	659.318	863.636	801.801	647.632	915.775	892.878	600.138	795.06	864.097	0.138684	0.074844	0.114229	0.170728	0.130453	0.087576	0.176506	0.088748	0.152243	J03773	1368185_at	Guanine nucleotide binding protein, alpha z polypeptide	Rn.10943	25740	Gnaz
4.77477	4.96315	5.19943	3.78713	4.08442	4.3144	4.54421	4.69359	5.4045	27.3747	31.193	36.7438	13.8051	16.9642	19.8959	23.3315	25.8768	42.3562	0.113892	0.129426	0.205597	0.120867	0.063095	0.165862	0.141334	0.128433	0.262263	NM_053981	1369795_at	Potassium inwardly-rectifying channel, subfamily J, member 12	Rn.10406	117052	Kcnj12
7.37304	7.75384	7.89992	7.6166	7.90482	8.15323	7.38054	7.6866	7.89127	165.77	215.843	238.843	196.257	239.656	284.686	166.634	206.014	237.415	0.075816	0.108558	0.112555	0.042384	0.037055	0.126883	0.07359	0.090797	0.052614	BF386909	1379094_at	ESTs	-	-	-
9.04663	9.01181	9.48066	8.90858	9.13882	9.6095	8.77892	8.9908	9.61871	528.819	516.208	714.436	480.562	563.714	781.174	439.257	508.745	786.177	0.177225	0.072002	0.161005	0.166301	0.087877	0.199566	0.09237	0.083192	0.150834	AW534721	1390808_at	Transcribed locus	Rn.168586	-	-
3.28913	3.76933	4.0926	3.81308	3.82763	4.14441	3.48082	3.77582	4.00452	9.77523	13.6358	17.0606	14.0557	14.1981	17.6845	11.1643	13.6973	16.0502	0.1752	0.263947	0.159132	0.133361	0.149311	0.18511	0.079121	0.158942	0.180068	AW524408	1379594_at	Transcribed locus	Rn.93081	-	-
5.81855	6.22523	6.4165	6.47882	6.66951	6.7351	5.97715	6.51274	6.51148	56.4362	74.8137	85.4199	89.1906	101.794	106.529	62.9943	91.3125	91.2328	0.159176	0.119131	0.102307	0.101839	0.136475	0.145872	0.154037	0.195696	0.178678	BI295861	1383075_at	Transcribed locus	Rn.163723	-	-
6.83586	7.19408	7.26401	6.40117	6.94524	7.11938	6.94555	7.02401	7.30835	114.235	146.431	153.704	84.517	123.233	139.042	123.259	130.148	158.501	0.221753	0.127058	0.205894	0.128263	0.191401	0.070049	0.122628	0.159391	0.167504	NM_053850	1368164_at	Biliverdin reductase A	Rn.9865	116599	Blvra
8.58904	9.06163	8.97022	7.81021	8.26695	8.33913	8.54936	8.92353	8.89325	385.087	534.346	501.54	224.444	308.035	323.838	374.64	485.568	475.483	0.277626	0.099464	0.148641	0.157282	0.086757	0.103498	0.170364	0.100032	0.106819	BF413778	1391383_at	Cartilage acidic protein 1	Rn.198566	171438	Crtac1
4.68454	5.12666	5.10449	4.68273	5.03771	5.32771	4.71512	5.00046	5.10317	25.715	34.9364	34.4037	25.6828	32.8475	40.1606	26.2659	32.0102	34.3722	0.133702	0.090467	0.20596	0.157811	0.129975	0.211983	0.130782	0.096145	0.095957	AA859665	1385273_at	Transcribed locus	Rn.203057	-	-
9.59269	10.1536	10.1183	9.95167	10.2992	10.2814	9.81806	10.1784	10.2368	772.125	1139.04	1111.51	990.264	1259.99	1244.54	902.673	1158.79	1206.66	0.173916	0.048538	0.088297	0.055913	0.055421	0.035147	0.050844	0.06605	0.03363	NM_133417	1398244_at	SYF2 homolog, RNA splicing factor (S. cerevisiae)	Rn.162117	170933	Syf2
8.73243	9.31059	9.07791	8.81662	9.23088	9.26307	8.74515	9.15505	9.09751	425.327	634.99	540.41	450.886	600.858	614.415	429.094	570.092	547.802	0.103928	0.088479	0.097283	0.085861	0.064705	0.104076	0.177999	0.103321	0.090864	BI292769	1382248_at	Similar to leucine rich repeat containing 45	Rn.216707	688318	LOC688318
7.55939	8.1407	7.97768	7.75428	8.23771	7.84242	7.47397	7.87237	8.00779	188.627	282.225	252.07	215.909	301.855	229.511	177.783	234.325	257.386	0.147235	0.20318	0.15308	0.067403	0.147546	0.112911	0.073871	0.173884	0.092112	AA998007	1393455_at	Basophil leukemia expressed sequence Bles05 mRNA, partial sequence	Rn.216496	-	-
9.0367	9.26894	9.16875	8.84523	9.54417	9.43002	8.74412	9.1186	9.19698	525.192	616.92	575.531	459.917	746.589	689.793	428.788	555.869	586.904	0.106766	0.079132	0.071539	0.091537	0.069851	0.059497	0.128099	0.066795	0.072614	BG377335	1396123_at	Tctex1 domain containing 2	Rn.137794	498095	Tctex1d2
11.3586	12.1582	12.0941	11.5089	11.8396	11.6727	11.8656	12.0692	12.0326	2625.91	4570.7	4372.07	2914.23	3665.01	3264.62	3731.66	4297.26	4189.61	0.360391	0.057752	0.058273	0.061324	0.027392	0.085765	0.046345	0.083452	0.054805	NM_057123	1398792_at	Proteasome (prosome, macropain) 26S subunit, ATPase, 1	Rn.10526	117263	Psmc1
7.02791	7.3804	7.29537	6.61435	6.997	7.05579	6.75483	7.18052	7.40772	130.5	166.618	157.082	97.9756	127.734	133.047	107.996	145.061	169.803	0.139236	0.083658	0.119138	0.133146	0.070679	0.149424	0.17312	0.103986	0.151007	AI713146	1391283_at	Transcribed locus	Rn.203490	-	-
7.88391	8.30854	8.36027	7.74372	8.21895	7.99731	7.91733	8.35232	8.39148	236.207	317.044	328.619	214.334	297.955	255.523	241.743	326.813	335.805	0.133173	0.085914	0.075785	0.079863	0.080783	0.076356	0.091693	0.049315	0.106459	AI177689	1372589_at	Similar to Basic FGF-repressed Zic-binding protein (mbFZb)	Rn.202684	683512	LOC683512
7.586	7.88047	7.96155	7.55845	7.96639	8.0551	7.47922	7.92543	7.99756	192.138	235.645	249.267	188.504	250.105	265.966	178.431	243.104	255.567	0.250508	0.097527	0.140877	0.177569	0.066523	0.142635	0.173905	0.084975	0.12157	BI281185	1367521_at	Transcribed locus, strongly similar to NP_722494.1 enhancer of mRNA decapping 3 [Mus musculus]	Rn.7260	-	-
8.74445	9.29907	9.33427	9.04189	9.47008	9.35553	8.94222	9.30647	9.21203	428.886	629.94	645.499	527.084	709.215	655.081	491.9	633.179	593.058	0.20312	0.107349	0.072187	0.122743	0.069968	0.089761	0.076594	0.12046	0.079867	BF281278	1388629_at	IMP (inosine monophosphate) dehydrogenase 2	Rn.8093	301005	Impdh2
9.32976	9.75328	9.64399	9.08417	9.58913	9.49697	9.26971	9.78329	9.63935	643.484	863.038	800.074	542.76	770.222	722.558	617.25	881.178	797.505	0.114049	0.109073	0.044666	0.083416	0.106331	0.075084	0.115281	0.098327	0.118455	BG380561	1383659_a_at	ESTs, Weakly similar to MAGEF1 protein (Homo sapiens) (H.sapiens)	-	-	-
12.2104	12.6142	12.4073	12.1463	12.657	12.5904	12.0096	12.5262	12.4598	4739.11	6269.78	5432.12	4533.16	6458.57	6167.2	4123.35	5898.78	5633.44	0.178122	0.106508	0.103202	0.140851	0.066101	0.162109	0.116676	0.051833	0.088332	AW532485	1373195_at	Similar to Fusion (involved in t(12;16) in malignant liposarcoma)	Rn.162385	501526	RGD1566093
8.03411	8.4735	8.63866	7.72827	7.88385	8.19462	8.05062	8.40757	8.53331	262.125	355.449	398.562	212.051	236.198	292.972	265.142	339.571	370.495	0.292508	0.061716	0.073686	0.054797	0.064495	0.100967	0.123205	0.075003	0.068821	AA891742	1388909_at	Oxidoreductase NAD-binding domain containing 1	Rn.3785	306270	Oxnad1
6.18458	6.6123	6.7611	6.19735	6.56703	6.66771	6.30664	6.51043	6.7759	72.7351	97.8364	108.466	73.3818	94.8141	101.667	79.1567	91.1664	109.585	0.155977	0.024565	0.09884	0.08997	0.084805	0.123439	0.060577	0.052184	0.069715	AI137618	1377299_at	Nuclear autoantigenic sperm protein (histone-binding)	Rn.48344	298441	Nasp
2.9359	3.42394	3.44395	3.05139	3.32025	3.29112	2.87443	3.42844	3.32631	7.65233	10.7327	10.8826	8.2901	9.98838	9.78872	7.33313	10.7662	10.0304	0.125371	0.22405	0.152887	0.097213	0.173751	0.134899	0.068763	0.237014	0.139418	AI763950	1395719_at	Tu translation elongation factor, mitochondrial	Rn.48850	293481	Tufm
6.58501	6.87161	6.88924	6.21635	6.6549	6.83485	6.52774	6.77469	7.12436	96.0032	117.101	118.541	74.3546	100.768	114.155	92.2668	109.493	139.523	0.12237	0.113488	0.13481	0.079871	0.074593	0.130881	0.146069	0.110208	0.15803	BF413334	1376133_at	Magnesium-dependent phosphatase 1	Rn.19870	290230	Mdp-1
6.92911	7.15726	7.32381	6.57574	7.16773	7.13448	6.79505	7.15094	7.16859	121.862	142.741	160.209	95.3883	143.781	140.505	111.049	142.117	143.867	0.075935	0.107583	0.069916	0.155846	0.121613	0.135572	0.128194	0.120807	0.131747	AA963783	1385296_at	TRNA methyltransferase 12 homolog (S. cerevisiae)	Rn.105294	314999	Trmt12
10.0357	10.6401	10.4986	10.3357	10.7435	10.6745	10.162	10.5818	10.4409	1049.66	1595.84	1446.75	1292.28	1714.41	1634.35	1145.69	1532.64	1390.03	0.240359	0.131593	0.134707	0.134394	0.093008	0.094444	0.163497	0.096704	0.114848	AI104605	1371739_at	Transcribed locus	Rn.166724	-	-
9.50864	9.95603	10.0415	9.01489	9.24648	9.52723	9.58651	9.91671	10.0437	728.427	993.262	1053.88	517.312	607.39	737.874	768.824	966.556	1055.49	0.235277	0.056369	0.108966	0.074574	0.050311	0.122233	0.079002	0.040769	0.093041	BF389637	1377273_at	Transcribed locus	Rn.206138	-	-
9.34899	9.90101	9.96878	9.86108	10.1475	10.1057	9.52403	9.94033	9.90028	652.118	956.095	1002.08	929.996	1134.23	1101.84	736.239	982.511	955.611	0.227705	0.070173	0.104771	0.064547	0.05512	0.054331	0.074219	0.086811	0.050089	AI180161	1373397_at	Microtubule-associated protein, RP/EB family, member 1	Rn.7652	114764	Mapre1
6.73595	7.33075	7.13572	6.75035	7.10486	7.11641	6.71044	7.07907	7.14111	106.592	160.981	140.626	107.661	137.65	138.756	104.723	135.211	141.152	0.157476	0.10082	0.136676	0.149424	0.084548	0.21646	0.123652	0.092967	0.180765	BG380421	1389455_at	SEC24 family, member B (S. cerevisiae)	Rn.102003	295461	Sec24b
8.10798	8.50901	8.49222	7.63127	7.96457	8.26651	8.07841	8.34509	8.55718	275.896	364.307	360.092	198.263	249.79	307.941	270.299	325.179	376.676	0.262102	0.065673	0.171818	0.106932	0.071445	0.11187	0.125764	0.103501	0.091902	AA819391	1377846_a_at	Transcribed locus, strongly similar to NP_034960.1 mutS homolog 6 [Mus musculus]	Rn.16755	-	-
7.00969	7.51965	7.13291	6.55591	7.15636	6.99744	6.87239	7.42973	7.10439	128.863	183.502	140.352	94.0861	142.652	127.773	117.164	172.414	137.605	0.084459	0.053331	0.116757	0.112464	0.046303	0.063724	0.149306	0.064706	0.095014	NM_053460	1368169_at	Protein interacting with PRKCA 1	Rn.24750	84591	Pick1
5.31046	5.81359	5.85552	5.13252	5.60893	5.77128	5.59597	5.57285	5.88814	39.6833	56.2425	57.9011	35.0786	48.8041	54.6171	48.3676	47.5987	59.2252	0.227158	0.079067	0.158225	0.168296	0.091239	0.065704	0.131394	0.200374	0.103942	NM_031647	1368129_at	Scm-like with four mbt domains 1	Rn.14839	58967	Sfmbt1
5.17134	5.79639	5.46081	5.27548	5.93035	5.35716	5.03426	5.44654	5.41649	36.0353	55.576	44.0421	38.7327	60.9836	40.9889	32.769	43.6086	42.7096	0.1626	0.183598	0.073679	0.082084	0.253094	0.15865	0.115213	0.240348	0.111403	AW524157	1394488_at	Transcribed locus	Rn.169433	-	-
4.84077	5.00092	4.92899	4.97366	5.43979	5.6098	4.49774	4.93052	5.14322	28.6561	32.0204	30.4631	31.4211	43.405	48.8335	22.592	30.4954	35.3398	0.077428	0.122461	0.127683	0.155197	0.170538	0.133364	0.221733	0.128339	0.148592	BF404846	1375088_at	Transcribed locus	Rn.154299	-	-
8.62374	9.0311	8.97903	8.6265	9.1153	9.18643	8.59946	8.90476	8.99039	394.461	523.157	504.612	395.217	554.599	582.628	387.878	479.292	508.601	0.119489	0.057135	0.079125	0.099805	0.057867	0.112863	0.068697	0.084303	0.091373	AA924793	1390155_at	Abhydrolase domain containing 6	Rn.15395	305795	Abhd6
6.47329	6.93223	7.0594	6.20049	6.50447	6.55266	6.71047	7.10163	7.12088	88.8494	122.126	133.38	73.5417	90.7905	93.8744	104.726	137.342	139.187	0.234097	0.111015	0.094616	0.057823	0.077582	0.096858	0.047299	0.098785	0.148481	BF285393	1379413_at	Nicotinamide nucleotide adenylyltransferase 1	Rn.147523	298653	Nmnat1
7.52457	7.90747	8.14265	6.95928	7.4333	7.293	7.58604	7.97957	7.87894	184.129	240.096	282.606	124.438	172.841	156.824	192.143	252.4	235.395	0.242845	0.162269	0.061509	0.115347	0.11006	0.119342	0.165599	0.110829	0.138689	BF419434	1376228_at	Transcribed locus	Rn.43445	-	-
5.62216	6.01933	6.01968	5.60658	5.81826	6.25747	5.53399	5.94114	5.94678	49.2537	64.8633	64.879	48.7247	56.4249	76.5044	46.3337	61.4414	61.6821	0.117435	0.11795	0.107975	0.078258	0.085689	0.219098	0.083565	0.153842	0.087183	AW534630	1379627_at	Transmembrane 9 superfamily member 3	Rn.17150	309475	Tm9sf3
7.41976	7.66215	8.14475	7.23824	7.47997	7.85129	7.67384	7.67382	8.23139	171.226	202.552	283.018	150.983	178.523	230.927	204.2	204.197	300.535	0.218511	0.078927	0.103097	0.046445	0.058156	0.237117	0.090566	0.167608	0.129656	BF418778	1389009_at	Arginine/serine-rich coiled-coil 1	Rn.73117	361956	Rsrc1
6.84876	7.33528	7.18031	7.10048	7.32755	7.33792	6.7976	7.3466	7.42704	115.261	161.488	145.04	137.233	160.625	161.783	111.245	162.76	172.092	0.255168	0.117592	0.108186	0.09656	0.059412	0.133141	0.122036	0.08946	0.054939	BF389852	1385090_at	RAD17 homolog (S. pombe)	Rn.154275	310034	Rad17
6.47369	6.7278	6.99206	6.23889	6.5446	6.94161	6.47805	6.46447	7.10063	88.874	105.991	127.297	75.5254	93.3514	122.923	89.143	88.3079	137.247	0.168107	0.080401	0.189256	0.170795	0.114274	0.236744	0.084329	0.166086	0.26052	AA799711	1379298_at	Interferon (alpha, beta and omega) receptor 1	Rn.105738	288264	Ifnar1
9.2078	9.38171	9.28785	9.23917	9.90856	9.65665	9.06712	9.71262	9.49224	591.322	667.077	625.06	604.32	961.112	807.126	536.383	839.054	720.193	0.085299	0.096038	0.118943	0.116471	0.119764	0.157957	0.116534	0.077653	0.093034	BF388125	1395661_at	Transcribed locus	Rn.171223	-	-
8.51157	9.12095	8.77808	8.70187	9.17753	9.06146	8.44583	8.87682	8.78725	364.954	556.775	439.001	416.413	579.044	534.283	348.697	470.099	441.8	0.087332	0.038773	0.151061	0.145133	0.053082	0.147652	0.13721	0.073006	0.142364	BE329013	1373565_at	SWI/SNF related, matrix associated, actin dependent regulator of chromatin, subfamily a, member 4	Rn.23417	171379	Smarca4
9.17123	9.58629	9.68642	9.30819	9.48714	9.76962	9.13926	9.53852	9.64903	576.521	768.707	823.954	633.935	717.652	872.868	563.886	743.671	802.874	0.302484	0.125174	0.12431	0.069223	0.064156	0.169955	0.101198	0.110513	0.115325	AI555799	1376887_at	Zinc finger protein 445	Rn.100996	301076	Zfp445
4.59572	4.68553	5.06862	4.32828	4.81184	4.88318	4.38611	4.53738	5.04733	24.1796	25.7327	33.5588	20.0883	28.0872	29.511	20.9098	23.2214	33.0672	0.165257	0.108787	0.287144	0.090229	0.14821	0.209606	0.128327	0.091596	0.25049	NM_017128	1369012_at	Inhibin beta-A	Rn.9874	29200	Inhba
8.02571	8.4461	8.34238	7.70243	8.25593	8.29581	7.91611	8.20977	8.20896	260.603	348.762	324.569	208.287	305.691	314.259	241.539	296.065	295.899	0.110167	0.052034	0.1642	0.148627	0.051684	0.153484	0.134307	0.116981	0.131997	BG371620	1383675_at	Transcribed locus, strongly similar to NP_955518.1 ribosomal RNA processing 12 homolog [Mus musculus]	Rn.216740	-	-
12.1429	12.5654	12.581	12.2085	12.5804	12.6704	12.183	12.5387	12.6317	4522.48	6061.25	6127.15	4732.87	6124.6	6518.84	4649.95	5950.11	6346.3	0.268237	0.097222	0.075522	0.116578	0.047482	0.111932	0.116046	0.089277	0.069234	AA851926	1371837_at	DEAD (Asp-Glu-Ala-Asp) box polypeptide 5	Rn.162208	287765	Ddx5
7.20906	7.68451	7.58623	7.42	7.87755	7.87059	7.2181	7.56066	7.61184	147.96	205.716	192.169	171.255	235.168	234.037	148.89	188.793	195.61	0.067815	0.086196	0.083575	0.071168	0.067243	0.096227	0.090553	0.1032	0.09039	AI411620	1374716_at	Ribosomal RNA processing 15 homolog (S. cerevisiae)	Rn.137835	360895	Rrp15
5.86715	6.4872	6.00442	5.6549	6.2975	6.16604	5.96165	6.30314	6.12246	58.3698	89.7102	64.1964	50.3842	78.6568	71.8064	62.3212	78.9649	69.6697	0.232723	0.102103	0.166608	0.169972	0.115291	0.191044	0.152705	0.149501	0.172944	BE100696	1384318_at	Torsin family 2, member A	Rn.13187	362112	Tor2a
10.2386	10.6809	10.6501	9.62139	9.97702	10.09	10.1914	10.594	10.6063	1208.16	1641.61	1606.94	787.639	1007.82	1089.92	1169.28	1545.65	1558.89	0.241019	0.072558	0.092963	0.097432	0.042883	0.078985	0.088584	0.088743	0.098383	AA859497	1376418_a_at	Transcribed locus	Rn.238	-	-
6.09188	6.86714	6.63741	6.38173	6.83203	6.48426	6.46396	6.81755	6.62409	68.2085	116.739	99.5542	83.3858	113.932	89.5276	88.2767	112.794	98.6393	0.27862	0.160506	0.111878	0.130288	0.143641	0.053924	0.113354	0.135535	0.089165	AI102591	1379320_at	Small nuclear ribonucleoprotein D1	Rn.18606	291794	Snrpd1
8.3622	8.96061	9.16827	9.05455	9.49189	9.36554	8.95375	9.09587	9.01646	329.058	498.21	575.34	531.73	720.018	659.642	495.847	547.179	517.875	0.244648	0.066704	0.137887	0.073943	0.091145	0.187682	0.070648	0.070975	0.097565	BF544977	1379832_at	Polymerase (RNA) II (DNA directed) polypeptide D	Rn.128728	364834	Polr2d
11.2493	11.7171	11.5578	10.764	11.3037	11.1874	11.1465	11.5471	11.4881	2434.31	3366.65	3014.7	1738.95	2527.86	2332.08	2266.89	2992.43	2872.52	0.167074	0.088868	0.177643	0.09065	0.186359	0.176087	0.147444	0.137919	0.161983	AI103194	1374188_at	SEC62 homolog (S. cerevisiae)	Rn.98327	294912	Sec62
10.4852	10.919	11.1053	10.6683	10.9831	11.0181	10.5766	10.8202	11.0756	1433.37	1936.18	2203.07	1627.34	2024.15	2073.86	1527.12	1808.03	2158.18	0.150771	0.047432	0.088216	0.097977	0.081536	0.075174	0.089861	0.126594	0.109376	AI179107	1373820_at	Transcribed locus, strongly similar to NP_001020297.1 ring finger and WD repeat domain 2 [Rattus norvegicus]	Rn.108036	-	-
6.7631	7.47678	7.2229	7.12978	7.68643	7.41514	7.07962	7.37353	7.18032	108.617	178.129	149.386	140.048	205.99	170.679	135.263	165.826	145.041	0.318773	0.074581	0.108277	0.126253	0.085116	0.143998	0.135328	0.130711	0.155674	AA848324	1373280_at	RuvB-like 2 (E. coli)	Rn.136577	292907	Ruvbl2
7.14802	7.56628	7.43346	7.08202	7.69348	7.57889	7.1816	7.51971	7.49081	141.83	189.53	172.86	135.488	206.999	191.194	145.17	183.509	179.87	0.098652	0.152913	0.100995	0.127445	0.13331	0.094331	0.136661	0.152149	0.069268	BG380750	1374190_at	Citrate lyase beta like	Rn.137340	306198	Clybl
8.65505	9.01613	9.04489	8.72939	9.03463	9.33438	8.57623	8.71255	9.19832	403.116	517.757	528.182	424.432	524.439	645.548	381.683	419.507	587.449	0.23469	0.059866	0.121733	0.099154	0.042883	0.149263	0.117088	0.105905	0.08168	BM390802	1391773_at	Transcribed locus	Rn.147680	-	-
6.9956	7.54952	7.0849	6.78413	7.34993	7.33774	6.91321	7.2112	7.26741	127.61	187.341	135.759	110.211	163.136	161.763	120.527	148.179	154.067	0.120494	0.049881	0.071022	0.100968	0.198651	0.173034	0.109682	0.117193	0.063212	AI044348	1382008_at	Similar to hypothetical protein FLJ11218	Rn.15885	361751	RGD1309804
7.7248	8.36293	7.98311	7.16118	7.76987	7.20693	7.74867	8.26159	8.07186	211.542	329.225	253.02	143.13	218.255	147.741	215.071	306.893	269.074	0.232272	0.052048	0.083323	0.140231	0.073291	0.144616	0.223197	0.055051	0.053483	AI408718	1378092_at	Magnesium-dependent phosphatase 1	Rn.19870	290230	Mdp-1
10.1705	10.6021	10.497	10.2435	10.6942	10.5429	10.0521	10.5015	10.5558	1152.46	1554.35	1445.15	1212.27	1656.82	1491.86	1061.66	1449.66	1505.26	0.165369	0.100495	0.062377	0.07768	0.046824	0.063077	0.117268	0.095577	0.045789	AW528625	1376086_at	UFM1-specific peptidase 2	Rn.14630	361151	Ufsp2
7.33258	7.88492	7.39878	6.71527	7.35187	7.15509	7.14913	7.68766	7.29456	161.186	236.373	168.754	105.075	163.355	142.527	141.939	206.166	156.993	0.06838	0.055195	0.202828	0.173705	0.045274	0.124451	0.235832	0.078323	0.121516	BE109049	1380917_at	Transcribed locus	Rn.148306	-	-
8.16664	8.35503	8.55606	8.14775	8.45217	8.64825	7.89051	8.22044	8.59065	287.345	327.427	376.384	283.607	350.233	401.22	237.29	298.263	385.517	0.111129	0.13014	0.118481	0.18886	0.086942	0.199374	0.141819	0.135894	0.151437	BI275598	1371813_at	HIRA interacting protein 3	Rn.12594	361650	Hirip3
8.94617	9.70855	9.35141	10.1428	10.5843	10.2043	9.08307	9.54753	9.31656	493.248	836.69	653.213	1130.54	1535.29	1179.78	542.346	748.33	637.623	0.190324	0.086838	0.059811	0.13823	0.111535	0.058299	0.09794	0.122895	0.095738	AI137249	1390766_at	Tubulin, alpha 8	Rn.27364	500377	Tuba8
2.54889	2.76091	3.17637	2.6181	2.83872	3.19866	2.58161	2.89432	3.03738	5.85184	6.77824	9.0403	6.13941	7.15385	9.18106	5.98607	7.43493	8.20999	0.053637	0.148846	0.173929	0.113838	0.167769	0.28341	0.067489	0.214738	0.21584	BF394953	1390704_at	SDA1 domain containing 1	Rn.12755	289504	Sdad1
3.48647	3.7242	3.86312	3.27721	3.70436	3.76078	3.26354	3.51827	3.90787	11.2081	13.2159	14.5517	9.69479	13.0354	13.5553	9.60336	11.4579	15.0102	0.09845	0.212757	0.127846	0.123574	0.14215	0.20803	0.062758	0.131553	0.185051	BF289079	1385970_at	Ctr9, Paf1/RNA polymerase II complex component, homolog (S. cerevisiae)	Rn.102000	293184	Ctr9
8.5795	8.93466	8.95233	8.74618	9.18274	9.23776	8.49685	8.89493	8.90064	382.549	489.329	495.359	429.4	581.139	603.73	361.249	476.037	477.925	0.181737	0.058098	0.069377	0.099525	0.057117	0.096826	0.118226	0.060474	0.096148	AI170661	1370942_at	RAS p21 protein activator 3	Rn.23055	29372	Rasa3
9.17313	9.69449	9.56142	9.54684	9.87134	10.0081	9.23029	9.58507	9.62857	577.281	828.576	755.569	747.972	936.633	1029.77	600.612	768.057	791.568	0.243098	0.091273	0.126962	0.120363	0.09009	0.110983	0.121179	0.098771	0.130233	L08814	1388129_at	Structure specific recognition protein 1	Rn.35908	81785	Ssrp1
6.71061	7.36431	7.13285	6.8859	7.26393	7.20183	6.76135	7.11062	7.06408	104.736	164.77	140.347	118.267	153.695	147.22	108.485	138.201	133.814	0.306807	0.066285	0.055069	0.083762	0.069796	0.047868	0.160866	0.077672	0.055605	AI232273	1373452_at	RNA terminal phosphate cyclase-like 1	Rn.22496	309301	Rcl1
5.40461	5.7457	5.67659	5.31291	5.90924	5.72739	5.1973	5.61352	5.58849	42.3594	53.6572	51.1474	39.7507	60.0978	52.9805	36.6896	48.9596	48.1175	0.063035	0.124746	0.137673	0.170819	0.11702	0.196068	0.195302	0.140142	0.127706	BE120831	1373494_at	Breakpoint cluster region	Rn.12782	309696	Bcr
8.79891	9.28722	9.44121	9.1187	9.35779	9.56305	8.90619	8.99394	9.38791	445.385	624.787	695.164	555.907	656.108	756.423	479.767	509.854	669.95	0.215362	0.044477	0.109634	0.098645	0.046533	0.140668	0.074051	0.155757	0.05354	BI292125	1376173_at	Transcribed locus, strongly similar to NP_001074790.1 PDS5, regulator of cohesion maintenance, homolog A [Mus musculus]	Rn.24482	-	-
8.33936	9.09502	8.99767	8.57183	8.8607	8.7354	8.7683	8.99743	9.00862	323.89	546.857	511.174	380.52	464.875	426.204	436.035	511.089	515.068	0.312413	0.048381	0.102923	0.059917	0.061223	0.059252	0.08815	0.117669	0.086863	U46149	1370506_at	Coenzyme Q7 homolog, ubiquinone (yeast)	Rn.6981	25249	Coq7
8.5956	9.16386	9.08441	8.92401	9.42521	9.14576	8.8351	9.26267	9.03489	386.842	573.584	542.85	485.73	687.497	566.432	456.699	614.245	524.533	0.224653	0.179119	0.155218	0.038714	0.114478	0.101628	0.06035	0.144999	0.12625	BG673668	1371324_at	Splicing factor 3b, subunit 5	Rn.2083	680891	Sf3b5
5.324	5.63095	5.58771	4.8592	5.2518	5.30485	5.07423	5.48674	5.67528	40.0575	49.5547	48.0915	29.0245	38.1021	39.5293	33.6896	44.8408	51.101	0.168946	0.155766	0.174794	0.097631	0.152481	0.165833	0.103827	0.133605	0.099229	AI111884	1396274_at	ESTs	-	-	-
8.91805	9.3238	9.3706	9.12926	9.44068	9.63527	9.00752	9.27078	9.49838	483.727	640.831	661.96	559.991	694.909	795.253	514.676	617.707	723.265	0.224647	0.072992	0.069458	0.11665	0.023267	0.089966	0.098497	0.063392	0.068065	BM386836	1380102_at	Family with sequence similarity 50, member A	Rn.106134	293862	FAM50A
8.56071	8.78491	9.17688	11.0047	11.2797	11.4533	8.48366	8.71072	9.08064	377.599	441.084	578.784	2054.68	2486.15	2804.06	357.961	418.975	541.433	0.120141	0.055141	0.087635	0.130903	0.080806	0.175023	0.139124	0.11496	0.107113	NM_013131	1368476_at	Nuclear receptor subfamily 3, group C, member 2	Rn.9678	25672	Nr3c2
6.0471	6.42611	6.18851	5.48338	6.03485	6.05442	5.85988	6.23812	6.24259	66.1239	85.9908	72.9335	44.7365	65.5648	66.4603	58.0764	75.4851	75.7193	0.084562	0.039854	0.122323	0.12605	0.096018	0.125485	0.115807	0.145154	0.118582	BF398016	1372322_at	Transcribed locus, strongly similar to XP_001055900.1 PREDICTED: similar to SGT1 protein homolog (Ecdysoneless homolog) [Ratt	Rn.216507	-	-
5.70908	5.96011	6.56228	5.61197	5.7874	6.00953	5.67334	5.76182	6.20902	52.3124	62.2547	94.5025	48.907	55.2308	64.4242	51.0323	54.2601	73.9778	0.184208	0.122641	0.251975	0.118786	0.19535	0.225359	0.112268	0.105065	0.302364	AI716277	1379221_at	Ring finger and SPRY domain containing 1	Rn.205644	689249	Rspry1
10.3939	10.9552	10.9741	10.3437	10.6559	10.7235	10.6276	10.9371	10.893	1345.48	1985.38	2011.56	1299.46	1613.41	1690.81	1582.07	1960.63	1901.6	0.216517	0.034421	0.054248	0.059575	0.028046	0.063497	0.07923	0.039906	0.09862	AI232313	1373775_at	Negative regulator of ubiquitin-like proteins 1	Rn.72440	296731	Nub1
9.19557	9.77756	9.61426	8.74914	9.31067	9.0931	9.33299	9.57516	9.58636	586.33	877.685	783.756	430.282	635.025	546.13	644.926	762.799	768.744	0.210392	0.062062	0.128034	0.081726	0.070556	0.078412	0.078728	0.147305	0.120221	AF154349	1368430_at	Legumain	Rn.206021	63865	Lgmn
9.76562	10.4338	10.2634	10.0768	10.6547	10.2776	10.1146	10.4521	10.1752	870.451	1383.21	1229.11	1079.99	1612.07	1241.27	1108.66	1400.86	1156.22	0.089513	0.080859	0.086331	0.053986	0.039139	0.076477	0.057579	0.076262	0.078967	AI638949	1388626_at	DDRGK domain containing 1	Rn.137483	296162	Ddrgk1
6.85472	7.21119	7.08126	6.21625	6.59105	6.59835	6.57761	7.12282	7.10314	115.738	148.178	135.417	74.3494	96.4059	96.895	95.512	139.374	137.486	0.111266	0.080568	0.117253	0.116753	0.097683	0.110725	0.10942	0.093372	0.078219	BM384752	1374704_at	KDEL (Lys-Asp-Glu-Leu) containing 2	Rn.98686	315664	Kdelc2
9.60852	10.1149	9.90225	9.42003	10.0189	9.76621	9.66245	10.0324	9.94573	780.643	1108.89	956.917	685.033	1037.5	870.807	810.377	1047.26	986.196	0.205376	0.077419	0.04855	0.078825	0.047239	0.046378	0.107783	0.077981	0.069442	NM_053556	1387002_at	BUD31 homolog (yeast)	Rn.8172	89819	Bud31
6.3442	6.65072	6.81379	6.62589	6.9136	6.92259	6.16619	6.59937	6.7704	81.2446	100.477	112.501	98.7624	120.559	121.313	71.8138	96.9635	109.168	0.183132	0.127973	0.047579	0.11819	0.079192	0.126958	0.247264	0.082151	0.120558	BF552141	1378034_at	MTERF domain containing 3	Rn.138073	366856	Mterfd3
7.41985	7.99292	8.03733	7.6167	7.78592	8.1074	7.70813	7.90416	8.01751	171.237	254.747	262.71	196.271	220.697	275.785	209.112	239.546	259.126	0.294431	0.046005	0.10351	0.040453	0.061953	0.084754	0.092631	0.125056	0.067482	AI072424	1382923_at	Synaptotagmin binding, cytoplasmic RNA interacting protein	Rn.202606	363113	Syncrip
9.91419	10.2869	10.1775	9.7175	10.0422	10.0949	9.68373	10.1758	10.2513	964.869	1249.3	1158.06	841.897	1054.4	1093.62	822.419	1156.7	1218.85	0.044957	0.025375	0.077133	0.036864	0.050274	0.045313	0.11182	0.051393	0.033924	AI410173	1374408_at	CBF1 interacting corepressor	Rn.99641	362149	Cir
7.81791	8.35805	8.42852	7.99289	8.08297	8.35527	7.92729	8.18532	8.41984	225.645	328.113	344.538	254.741	271.154	327.482	243.418	291.09	342.471	0.238443	0.091983	0.103437	0.08287	0.073088	0.074375	0.119389	0.080326	0.074248	AA800763	1376832_at	Transcribed locus	Rn.6636	-	-
10.7445	11.181	11.2463	10.0597	10.4541	10.4836	10.8407	11.0429	11.2808	1715.6	2321.75	2429.26	1067.26	1402.81	1431.79	1833.9	2109.81	2488.05	0.274041	0.114351	0.085732	0.100727	0.176132	0.116347	0.1138	0.108689	0.116573	AA942728	1373811_at	RAP1, GTP-GDP dissociation stimulator 1	Rn.160647	310909	Rap1gds1
5.61476	5.8601	5.77974	5.28625	5.60337	5.88446	5.38893	5.86115	5.95307	49.0017	58.0853	54.9383	39.0229	48.6164	59.0744	41.9015	58.1275	61.9516	0.183743	0.087586	0.126643	0.089737	0.088142	0.194087	0.112882	0.108171	0.110069	BG375931	1378757_at	Similar to RIKEN cDNA 6330408A02 gene	Rn.207230	308381	RGD1310257
5.2856	5.63649	5.50944	5.20773	5.50193	5.5949	5.17091	6.01494	5.37846	39.0053	49.7454	45.5519	36.9558	45.3154	48.3318	36.0246	64.6662	41.5985	0.172544	0.127428	0.087844	0.094628	0.100975	0.081814	0.253499	0.09693	0.059125	BF547270	1391849_at	MBD2-interacting zinc finger	Rn.38367	300665	Mizf
6.86782	7.47478	7.0124	6.7665	7.36096	7.15359	6.89174	7.38828	6.98923	116.794	177.882	129.105	108.873	164.388	142.379	118.746	167.531	127.048	0.050339	0.038109	0.044516	0.072174	0.039307	0.075416	0.080132	0.070062	0.093563	AI556478	1383961_a_at	DnaJ (Hsp40) homolog, subfamily C, member 11	Rn.66161	362666	Dnajc11
11.0782	11.418	11.3384	10.8039	11.2966	11.3001	10.9008	11.3292	11.2749	2162.07	2736.28	2589.4	1787.71	2515.45	2521.56	1911.91	2572.94	2477.9	0.068218	0.031176	0.060692	0.102938	0.053544	0.065801	0.126758	0.065765	0.039623	AW531123	1373135_at	Alanyl-tRNA synthetase domain containing 1	Rn.153971	619440	Aarsd1
10.1079	10.3325	10.2404	9.59464	10.0982	10.1823	9.79311	10.2086	10.2788	1103.52	1289.41	1209.67	773.169	1096.13	1161.92	887.197	1183.3	1242.3	0.062977	0.056033	0.107211	0.128263	0.082121	0.090854	0.126951	0.063842	0.090264	AI177465	1383386_a_at	Transcribed locus, strongly similar to NP_081546.1 exocyst complex component 1 [Mus musculus]	Rn.155360	-	-
6.3261	6.57194	6.69818	6.07144	6.27614	6.31731	6.07789	6.66739	6.75111	80.2317	95.1374	103.837	67.249	77.5008	79.7443	67.5503	101.645	107.718	0.0441	0.073693	0.097319	0.172812	0.126553	0.162717	0.146153	0.057436	0.073932	BM390024	1385015_at	Zinc binding alcohol dehydrogenase, domain containing 2	Rn.12321	291403	Zadh2
9.88927	10.3934	10.3877	9.95519	10.3304	10.281	9.9847	10.2996	10.3534	948.346	1345.01	1339.71	992.683	1287.54	1244.2	1013.2	1260.34	1308.23	0.309531	0.063223	0.077143	0.049736	0.05228	0.036098	0.103626	0.095859	0.069191	BM383406	1383737_at	ESTs	-	-	-
2.91262	3.19729	3.60105	2.96532	3.03523	3.47362	2.862	3.04779	3.42371	7.52984	9.17234	12.1346	7.80999	8.19776	11.1087	7.27022	8.26944	10.731	0.075918	0.138513	0.227876	0.051318	0.224121	0.24748	0.051615	0.131718	0.221869	BF394502	1379649_at	Glycosyltransferase 8 domain containing 3	Rn.14826	300173	Glt8d3
9.38795	10.0994	10.113	9.80745	9.97883	10.0326	9.75213	9.94903	9.99475	669.969	1097.04	1107.43	896.059	1009.08	1047.4	862.35	988.454	1020.28	0.188328	0.085995	0.065175	0.106274	0.086872	0.151507	0.123589	0.076372	0.069586	BG381660	1370965_at	Zinc finger E-box binding homeobox 1	Rn.10600	25705	Zeb1
9.15225	9.47189	9.42156	8.90823	9.14607	9.33125	8.88632	9.31057	9.56404	568.986	710.106	685.76	480.446	566.554	644.149	473.205	634.981	756.943	0.192497	0.048624	0.123237	0.131552	0.118367	0.083673	0.076321	0.092246	0.097883	BF564881	1390690_at	Transcribed locus	Rn.166552	-	-
8.89029	9.27202	9.47073	8.88832	9.22033	9.54063	9.13409	9.12321	9.50218	474.508	618.239	709.535	473.861	596.48	744.759	561.869	557.648	725.172	0.203711	0.060693	0.166485	0.123414	0.12149	0.124291	0.085018	0.079013	0.12366	AA956689	1385671_at	Transcribed locus	Rn.199202	-	-
7.57312	8.12269	7.97816	6.9919	7.43148	7.24904	7.59729	7.94562	7.9721	190.43	278.723	252.154	127.283	172.623	152.117	193.648	246.53	251.097	0.243581	0.102761	0.063028	0.140154	0.036074	0.084972	0.142824	0.083024	0.092529	BI275982	1374082_at	Similar to PRO1853 homolog	Rn.27740	298748	RGD1311578
9.07257	9.54619	9.20562	8.71276	9.16842	9.13379	8.84938	9.28297	9.29546	538.413	747.635	590.429	419.568	575.399	561.752	461.242	622.949	628.365	0.104132	0.049472	0.137729	0.116018	0.048446	0.174443	0.131907	0.105555	0.124265	BM384125	1389733_at	Methionine-tRNA synthetase	Rn.140163	299851	Mars
7.58037	8.03654	8.09105	7.68862	7.98982	8.21302	7.69816	7.88407	8.07948	191.39	262.567	272.677	206.303	254.2	296.733	207.672	236.234	270.499	0.088669	0.105572	0.078876	0.107024	0.096542	0.061238	0.071727	0.111312	0.102428	BE103347	1385346_at	WW domain binding protein 4 (formin binding protein 21)	Rn.163280	114765	Wbp4
5.42824	5.8712	5.75454	5.48749	5.92781	5.74441	5.27245	5.61092	5.8331	43.0589	58.5339	53.987	44.8641	60.8764	53.6092	38.6514	48.8714	57.0083	0.085387	0.047117	0.073117	0.077111	0.069582	0.088288	0.113278	0.103359	0.09593	NM_053418	1368665_at	Ubiquitin fusion degradation 1 like (yeast)	Rn.11946	84478	Ufd1l
7.02843	7.49379	7.40829	6.88695	7.48812	7.18468	7.10442	7.56442	7.24221	130.547	180.242	169.87	118.353	179.535	145.48	137.608	189.285	151.399	0.111553	0.069489	0.045665	0.049714	0.086652	0.067876	0.106691	0.132732	0.059562	BM387366	1388969_at	Acyl-CoA synthetase family member 3	Rn.204483	498962	Acsf3
3.95001	4.39544	4.10867	4.0018	4.62924	4.36734	3.82189	4.08445	4.29475	15.4551	21.0455	17.2517	16.02	24.748	20.6396	14.1418	16.9645	19.6268	0.104895	0.117687	0.16083	0.072943	0.069843	0.148776	0.106483	0.139351	0.205328	BF407639	1378760_at	Similar to RIKEN cDNA 0610011L14 gene	Rn.52749	296312	RGD1311066
8.31166	8.85559	8.87952	8.47605	8.64456	8.77739	8.45755	8.70016	8.96078	317.731	463.232	470.979	356.078	400.195	438.791	351.541	415.919	498.269	0.253732	0.071636	0.106691	0.075371	0.102801	0.068492	0.090974	0.107642	0.095522	BI295047	1374913_at	SET domain containing 3	Rn.7951	299295	Setd3
9.06357	9.48147	9.32181	8.72157	9.23343	9.06655	8.92009	9.36188	9.30936	535.065	714.837	639.948	422.138	601.921	536.171	484.412	657.971	634.449	0.19489	0.044257	0.045309	0.122301	0.093712	0.045537	0.146106	0.090194	0.103918	AW534879	1379385_at	Tumor suppressing subtransferable candidate 1	Rn.119114	362721	Tssc1
6.99725	7.52591	7.64997	6.68726	7	7.18284	7.35944	7.55824	7.46789	127.756	184.3	200.849	103.054	128	145.295	164.215	188.476	177.035	0.145025	0.076154	0.090117	0.172526	0.128707	0.140282	0.086677	0.062603	0.113985	BG377201	1392590_at	Rho GTPase activating protein 24	Rn.24657	305156	Arhgap24
5.53855	5.96044	5.65366	5.53653	6.08698	6.14737	5.33452	5.5946	5.68632	46.4804	62.2689	50.3409	46.4153	67.9772	70.8831	40.3506	48.3217	51.4936	0.13313	0.087866	0.151624	0.166784	0.061187	0.136338	0.127585	0.195315	0.089142	BF417974	1377941_at	Transcribed locus	Rn.205548	-	-
10.0981	10.6862	10.3933	10.4995	11.0205	10.7385	10.1089	10.5449	10.3584	1096.05	1647.66	1344.92	1447.65	2077.31	1708.48	1104.29	1493.93	1312.77	0.156188	0.059897	0.110819	0.094344	0.073568	0.114132	0.135704	0.121033	0.108917	NM_022536	1369934_at	Peptidylprolyl isomerase B	Rn.1893	64367	Ppib
11.1873	11.7545	11.61	10.9151	11.4206	11.2279	11.3898	11.7653	11.5335	2331.92	3455.07	3125.78	1930.96	2741.22	2398.47	2683.31	3481.03	2964.35	0.128932	0.048951	0.119524	0.096178	0.118449	0.143283	0.124742	0.067372	0.068816	AI575434	1372431_at	Mitochondrial ribosomal protein L12	Rn.105932	303746	Mrpl12
10.467	10.8308	10.7398	10.0245	10.5085	10.583	10.443	10.715	10.8313	1415.41	1821.36	1710.02	1041.54	1456.71	1533.91	1392.05	1680.88	1821.99	0.178452	0.048597	0.142679	0.176862	0.08058	0.120316	0.130372	0.086472	0.130128	BI274753	1371931_at	General transcription factor II I	Rn.27575	353256	Gtf2i
5.96933	6.48675	6.07658	5.785	6.54654	6.14322	5.84157	6.23497	5.95475	62.6538	89.6822	67.489	55.139	93.477	70.6795	57.344	75.3205	62.0238	0.252223	0.112551	0.120381	0.11338	0.137209	0.063456	0.125651	0.121828	0.124534	NM_031330	1367754_s_at	Heterogeneous nuclear ribonucleoprotein A/B	Rn.1427	83498	Hnrnpab
10.7922	11.2604	11.2324	10.8857	11.2457	11.2238	10.8307	11.1359	11.2692	1773.27	2453.12	2405.97	1892	2428.25	2391.67	1821.23	2250.3	2468.13	0.058182	0.027082	0.058591	0.052561	0.05088	0.048273	0.078119	0.063178	0.06367	AI101527	1388974_at	Signal recognition particle 19	Rn.116072	291685	Srp19
5.94667	6.05304	6.72081	5.52557	5.55024	6.05691	5.85228	5.88366	6.52772	61.6774	66.3967	105.479	46.0641	46.8585	66.5751	57.7713	59.0416	92.2655	0.245973	0.156354	0.161203	0.135364	0.164892	0.095453	0.206745	0.208905	0.135273	AW532098	1379866_at	Transcribed locus	Rn.206940	-	-
8.08899	8.55654	8.3495	8.15245	8.75857	8.41221	7.94859	8.48192	8.11035	272.288	376.509	326.174	284.533	433.104	340.665	247.038	357.53	276.349	0.124461	0.103815	0.124975	0.121214	0.153201	0.081555	0.11534	0.136479	0.051403	BF406601	1383658_at	Lysosomal multispanning membrane protein 5	Rn.24799	89783	Laptm5
8.30588	8.26956	8.60639	7.37125	7.6676	7.98133	7.87142	8.26205	8.54356	316.46	308.593	389.746	165.565	203.319	252.708	234.171	306.99	373.137	0.094551	0.054373	0.128162	0.115588	0.090691	0.204074	0.177063	0.073684	0.129207	BF411395	1383941_at	ESTs, Weakly similar to T17242 hypothetical protein DKFZp586B1417.1 (H.sapiens)	-	-	-
9.60319	10.2811	10.1373	9.48936	9.77992	9.76746	10.0071	10.3091	10.2057	777.765	1244.28	1126.24	718.757	879.122	871.562	1029.05	1268.67	1180.92	0.274337	0.03341	0.100673	0.040015	0.110025	0.094896	0.068532	0.078936	0.056092	NM_053899	1387244_at	Cell growth regulator with ring finger domain 1	Rn.87514	116679	Cgrrf1
8.774	9.24542	9.02756	7.74693	8.25519	8.22527	8.77893	9.08961	9.07531	437.761	606.944	521.875	214.812	305.534	299.263	439.26	544.81	539.437	0.165382	0.034943	0.130855	0.085088	0.035387	0.053778	0.158128	0.048824	0.103039	BF420110	1374590_at	Phospholipase C-like 2	Rn.204118	301173	Plcl2
9.7128	10.1816	10.333	9.72896	9.73724	10.0544	9.9433	10.3156	10.4162	839.159	1161.36	1289.86	848.611	853.496	1063.35	984.536	1274.4	1366.43	0.290998	0.044484	0.089092	0.070943	0.049299	0.05753	0.0449	0.087105	0.039627	BF551187	1385581_at	Transcribed locus	Rn.38811	-	-
10.4771	10.9383	10.9491	10.5069	10.8003	10.9088	10.511	10.77	10.9459	1425.35	1962.26	1977	1455.1	1783.26	1922.54	1459.24	1746.2	1972.62	0.219685	0.063762	0.087404	0.058287	0.04339	0.086514	0.074519	0.084588	0.055183	H31665	1374105_at	HIG1 domain family, member 1A	Rn.2084	140937	Higd1a
6.22935	6.69593	6.48534	5.78049	6.29916	6.17837	6.13077	6.5293	6.40796	75.0276	103.675	89.5946	54.9669	78.7474	72.4227	70.0722	92.3666	84.9157	0.07848	0.067229	0.111034	0.076626	0.101526	0.044335	0.132214	0.120799	0.118025	BF284337	1373963_at	Haloacid dehalogenase-like hydrolase domain containing 3	Rn.17659	688746	Hdhd3
4.62076	4.65875	4.93014	4.3915	4.74824	5.08227	4.53236	4.68647	5.19044	24.603	25.2594	30.4874	20.9881	26.8759	33.8778	23.1407	25.7495	36.5156	0.126988	0.029417	0.132321	0.190391	0.077832	0.265226	0.018958	0.192931	0.177869	BG375343	1382287_at	Ribonucleic acid binding protein S1	Rn.7235	287113	Rnps1
9.22548	9.76114	9.688	9.21731	9.45552	9.69894	9.4275	9.7085	9.72925	598.613	867.753	824.857	595.233	702.094	831.136	688.589	836.661	848.782	0.323327	0.072041	0.072922	0.054335	0.099238	0.102309	0.103063	0.058111	0.063312	AA957410	1398441_at	NCK adaptor protein 2	Rn.9067	316369	Nck2
6.59802	7.08474	7.34257	7.22415	7.45584	7.53346	6.87533	7.061	7.16591	96.8728	135.744	162.306	149.515	175.562	185.267	117.403	133.528	143.6	0.225082	0.076868	0.083792	0.104363	0.058037	0.054543	0.12911	0.117403	0.055569	AA851258	1371519_at	Electron-transferring-flavoprotein dehydrogenase	Rn.37277	295143	Etfdh
7.89741	8.41275	8.37731	7.97331	8.20288	8.17746	7.90057	8.31298	8.35436	238.428	340.793	332.523	251.308	294.654	289.508	238.951	318.021	327.275	0.165464	0.078881	0.049475	0.077866	0.098367	0.126036	0.080519	0.069307	0.038922	AI412140	1382556_a_at	Similar to DIP13 alpha	Rn.34413	290537	RGD1309388
6.42624	6.62377	6.88115	6.48359	6.87229	7.23245	6.36756	6.4697	6.70983	85.9985	98.6174	117.878	89.486	117.156	150.378	82.5708	88.6286	104.679	0.13308	0.041002	0.077527	0.063318	0.047556	0.112548	0.094493	0.113976	0.062015	BF567681	1398180_at	Transcribed locus	Rn.146192	-	-
6.55349	7.10392	6.92793	6.58358	7.1634	6.86509	6.73666	7.15368	6.79509	93.9284	137.56	121.763	95.908	143.35	116.573	106.644	142.388	111.052	0.244279	0.073001	0.20137	0.092848	0.08409	0.12387	0.119943	0.08716	0.198288	BM386183	1398953_at	Tissue specific transplantation antigen P35B	Rn.6606	300036	Tsta3
8.45409	9.24301	8.92337	8.70507	8.99463	8.75187	8.75406	9.0655	9.06325	350.699	605.931	485.514	417.337	510.098	431.097	431.752	535.781	534.946	0.268574	0.073305	0.10958	0.110822	0.099521	0.057061	0.157945	0.118633	0.075372	BE118950	1379028_at	sperm associated antigen 7	-	-	-
4.8347	4.98934	5.3739	5.32777	5.24997	5.94267	4.69055	4.86441	5.43305	28.5358	31.7644	41.4672	40.1623	38.0538	61.5066	25.8224	29.1295	43.2027	0.088219	0.069685	0.124114	0.13244	0.136674	0.224433	0.123111	0.105843	0.15801	NM_032069	1369343_at	Glutamate receptor interacting protein 1	Rn.74240	84016	Grip1
9.68472	10.1211	9.7549	9.47239	9.97515	9.88946	9.4689	9.96741	9.81912	822.984	1113.67	864.007	710.352	1006.51	948.471	708.636	1001.13	903.337	0.161635	0.082564	0.150354	0.144898	0.089745	0.10517	0.177285	0.08963	0.099357	BI285671	1388341_at	RAN GTPase activating protein 1	Rn.107099	362965	Rangap1
8.54374	9.08189	9.09198	8.40763	8.56577	8.6601	8.68574	8.89928	9.23156	373.183	541.903	545.706	339.585	378.925	404.529	411.783	477.475	601.141	0.279915	0.088755	0.09882	0.098962	0.079285	0.062324	0.117495	0.106705	0.081364	BM390497	1380553_at	Oxidative stress induced growth inhibitor family member 2	Rn.211931	313085	Osgin2
11.6311	12.1256	12.0982	11.5891	11.8926	11.944	11.693	11.9634	12.104	3171.83	4468.58	4384.51	3080.82	3802.15	3940.05	3310.88	3993.39	4402.17	0.205201	0.068134	0.083485	0.061053	0.050555	0.099122	0.044792	0.090332	0.060215	BF419628	1373319_at	DEAD (Asp-Glu-Ala-Asp) box polypeptide 1	Rn.65536	84474	Ddx1
9.89034	10.2482	10.1426	10.0345	10.5143	10.5496	9.85721	10.268	10.1354	949.05	1216.23	1130.39	1048.78	1462.58	1498.81	927.504	1233.04	1124.76	0.138616	0.061276	0.042706	0.1149	0.063902	0.032673	0.115276	0.057775	0.042548	AI178206	1398363_at	CDNA clone IMAGE:7455578	Rn.219224	-	-
7.63102	7.92032	7.84561	7.4784	8.05196	7.98394	7.51783	7.82628	7.9068	198.228	242.244	230.019	178.329	265.388	253.166	183.27	226.958	239.985	0.174633	0.126026	0.115954	0.109811	0.063267	0.114383	0.121373	0.128435	0.139673	AI179264	1372990_at	CAMP responsive element binding protein 3	Rn.104043	298400	Creb3
5.83629	5.35507	6.16652	5.51014	5.5255	6.40966	5.48433	5.48118	6.47295	57.1345	40.9295	71.8303	45.574	46.0618	85.0159	44.766	44.6683	88.8285	0.228799	0.119336	0.315673	0.264751	0.172693	0.472254	0.211101	0.175418	0.26678	AI236099	1395973_at	Transcribed locus	Rn.167282	-	-
7.80166	8.0076	7.97444	8.06885	8.40565	8.63737	7.53112	7.90909	8.12038	223.118	257.352	251.504	268.513	339.12	398.206	184.966	240.366	278.277	0.195836	0.121161	0.08203	0.164709	0.088165	0.058558	0.097571	0.046331	0.070664	BI288565	1384500_at	Similar to CG2919-PA	Rn.198729	362580	RGD1305604
5.69274	6.20413	6.28903	6.38579	6.77819	6.72969	6.06305	6.32537	6.21592	51.7232	73.7275	78.1964	83.6208	109.759	106.13	66.859	80.1911	74.3324	0.169546	0.105991	0.123025	0.127537	0.098479	0.095979	0.141404	0.055389	0.095602	BG379822	1385676_at	Cd2 (cytoplasmic tail) binding protein 2	Rn.14633	293505	Cd2bp2
7.60553	8.04489	8.47992	7.97817	8.07856	8.4316	8.0405	7.92126	8.39476	194.757	264.091	357.035	252.156	270.327	345.275	263.288	242.402	336.569	0.131203	0.163212	0.104885	0.118609	0.206668	0.125291	0.114982	0.176791	0.149213	BI291413	1383179_at	Transcribed locus	Rn.15161	-	-
12.4772	13.1521	12.9455	12.5505	12.9161	12.6931	12.6932	13.0132	12.964	5701.79	9102.83	7888.31	5998.97	7729.18	6622.22	6622.68	8267.3	7990.11	0.313605	0.079783	0.072002	0.059877	0.048049	0.101831	0.066622	0.093117	0.083468	BG666999	1388112_at	Solute carrier family 25 (mitochondrial carrier; adenine nucleotide translocator), member 4	Rn.4092	85333	Slc25a4
8.0596	8.51446	8.23188	7.46465	8.04612	7.75427	7.96574	8.52028	8.15694	266.797	365.686	300.637	176.638	264.316	215.908	249.992	367.164	285.419	0.148107	0.114692	0.165439	0.12097	0.093501	0.163345	0.131553	0.11225	0.217015	NM_021997	1368571_at	CAP-GLY domain containing linker protein 2	Rn.10893	29264	Clip2
6.07305	6.60198	6.3324	5.92412	6.36887	6.26344	6.04646	6.56831	6.21402	67.324	97.1391	80.5828	60.7208	82.6458	76.8216	66.0946	94.8983	74.2346	0.10989	0.070443	0.062597	0.047884	0.076926	0.101634	0.093676	0.081462	0.150677	BI276976	1388864_at	DEAD (Asp-Glu-Ala-Asp) box polypeptide 54	Rn.41869	360815	Ddx54
8.33788	8.75001	8.67497	8.45407	8.87325	8.97765	8.38805	8.61694	8.74813	323.558	430.542	408.72	350.694	468.937	504.129	335.008	392.606	429.981	0.154262	0.077448	0.076798	0.175774	0.07164	0.091915	0.132122	0.115735	0.110047	BF420723	1375565_at	Translocase of inner mitochondrial membrane 22 homolog (yeast)	Rn.41817	79463	Timm22
8.03527	8.29677	8.35774	8.02048	8.4848	8.68066	8.03466	8.31437	8.29842	262.336	314.468	328.043	259.66	358.244	410.335	262.225	318.328	314.828	0.101659	0.084886	0.090661	0.093097	0.105526	0.036765	0.099881	0.09808	0.120609	BM386940	1388877_at	Mitochondrial ribosomal protein S5	Rn.9035	296134	Mrps5
5.58419	6.09799	5.97025	5.17916	5.58684	5.62107	5.56238	5.74295	5.90488	47.9743	68.498	62.6938	36.2312	48.0625	49.2165	47.2545	53.555	59.9164	0.065256	0.111101	0.134141	0.137612	0.15337	0.130433	0.096678	0.144104	0.056465	AI044568	1392007_at	USP6 N-terminal like	Rn.56101	291309	Usp6nl
7.80945	7.86244	8.03879	7.82592	7.99326	8.44109	7.30181	7.78612	7.93848	224.326	232.718	262.976	226.901	254.807	347.553	157.784	220.727	245.313	0.247827	0.090257	0.076304	0.06473	0.133939	0.155855	0.103096	0.214526	0.033784	BF389365	1392397_at	Transcribed locus	Rn.206192	-	-
6.9144	7.21342	7.07486	6.76454	7.10578	7.06611	6.65169	7.30278	7.13581	120.626	148.407	134.817	108.725	137.738	134.002	100.544	157.89	140.635	0.107176	0.130964	0.122103	0.109284	0.07566	0.190613	0.161315	0.14584	0.069142	BI274837	1379325_at	Makorin ring finger protein 1	Rn.101798	296988	Mkrn1
9.45721	9.79114	9.59341	9.38786	10.0444	9.86073	9.47974	9.80342	9.78955	702.917	885.986	772.51	669.927	1056	929.77	713.98	893.56	885.01	0.123216	0.093595	0.122848	0.124904	0.1247	0.057331	0.128001	0.055171	0.113365	NM_133580	1369004_at	RAB26, member RAS oncogene family	Rn.10975	171111	Rab26
10.3346	10.7272	10.8013	10.4683	10.8624	10.8352	10.4123	10.6289	10.8498	1291.29	1695.15	1784.49	1416.68	1861.69	1826.92	1362.75	1583.5	1845.51	0.267282	0.107937	0.06215	0.115324	0.093235	0.092538	0.094781	0.143077	0.109247	BI279024	1371709_at	Mitochondrial ribosomal protein L3	Rn.6950	300974	Mrpl3
10.0967	10.6264	10.5911	10.1774	10.398	10.4566	10.1594	10.4458	10.6062	1094.99	1580.76	1542.55	1157.98	1349.3	1405.24	1143.63	1394.76	1558.78	0.204977	0.052567	0.072057	0.06581	0.072877	0.051709	0.041893	0.078773	0.051832	AI704947	1383181_at	DnaJ (Hsp40) homolog, subfamily C, member 9	Rn.16186	364240	Dnajc9
9.10873	9.49195	9.12751	8.25358	8.91018	8.614	8.82279	9.40484	9.01039	552.079	720.048	559.312	305.193	481.096	391.807	452.819	677.858	515.701	0.083011	0.051675	0.071717	0.116018	0.047521	0.038343	0.150306	0.102068	0.117141	AI171870	1398911_at	Mitochondrial ribosomal protein L2	Rn.102111	301240	Mrpl2
11.3867	11.9909	11.5781	11.1987	11.6993	11.4029	11.3678	11.848	11.6152	2677.55	4070.25	3057.42	2350.42	3325.37	2707.79	2642.71	3686.41	3137.07	0.205365	0.09324	0.132181	0.127806	0.093381	0.134595	0.152763	0.13555	0.091867	BI284599	1371542_at	Tubulin, alpha 4A	Rn.92961	316531	Tuba4a
8.10973	8.30556	8.56452	8.46901	8.62977	9.05407	8.06371	8.19921	8.7221	276.231	316.39	378.597	354.345	396.113	531.553	267.558	293.906	422.293	0.267445	0.157162	0.14893	0.140027	0.144349	0.179977	0.163982	0.136391	0.115649	BF394639	1390817_at	Transcribed locus	Rn.48849	-	-
8.17907	8.70112	8.41274	7.83456	8.53271	8.24985	8.29959	8.61772	8.2933	289.831	416.196	340.79	228.264	370.341	304.405	315.083	392.819	313.713	0.141719	0.064088	0.037884	0.092351	0.044554	0.061498	0.099869	0.107408	0.110533	BG377329	1379759_at	Carbohydrate kinase domain containing	Rn.24864	361185	Carkd
8.2195	8.5308	8.26841	7.33405	7.90461	7.97944	8.01744	8.40468	8.2509	298.068	369.851	308.347	161.35	239.621	252.378	259.113	338.892	304.627	0.084805	0.07274	0.108717	0.150435	0.06653	0.145376	0.101804	0.099667	0.113874	BF416022	1397581_at	Ras homolog gene family, member V	Rn.30047	171581	Rhov
7.27596	7.8512	7.48776	7.08009	7.58339	7.32969	7.33071	7.81847	7.5336	154.982	230.912	179.49	135.307	191.791	160.863	160.977	225.732	185.285	0.107623	0.032167	0.058743	0.091718	0.081307	0.026774	0.075612	0.08632	0.066693	AI236260	1398353_at	SAR1 homolog A (S. cerevisiae)	Rn.15760	361842	Sar1a
6.35202	6.71114	6.9003	7.08536	7.48713	7.44783	6.59973	6.99982	6.78346	81.6862	104.774	119.453	135.802	179.412	174.59	96.9877	127.984	110.16	0.079913	0.092125	0.052488	0.07495	0.156889	0.10008	0.109246	0.172469	0.095519	AW144049	1382613_at	Transcribed locus	Rn.24594	-	-
10.7169	11.0877	11.1165	10.723	11.0721	11.0823	10.6637	10.9808	11.1403	1683.09	2176.36	2220.24	1690.23	2152.95	2168.23	1622.16	2020.92	2257.17	0.121113	0.054754	0.063224	0.093952	0.08235	0.104856	0.117543	0.07112	0.134035	BE108903	1372793_at	Single-stranded DNA binding protein 1	Rn.106922	54304	Ssbp1
8.79114	9.3114	9.12353	8.82922	9.29369	9.10946	8.94557	9.35938	9.18981	442.993	635.347	557.771	454.841	627.595	552.358	493.043	656.832	583.994	0.220343	0.038967	0.091995	0.082194	0.092814	0.087732	0.080718	0.059389	0.067331	AI411153	1371661_at	Mitochondrial ribosomal protein S23	Rn.198893	360594	Mrps23
10.8279	11.366	11.4123	11.0224	11.2731	11.1959	10.9789	11.2502	11.388	1817.7	2639.41	2725.49	2080.05	2474.81	2345.86	2018.27	2435.83	2679.97	0.261104	0.083893	0.086308	0.057642	0.081962	0.081052	0.114265	0.088335	0.087959	BF282262	1371869_at	Proteasome (prosome, macropain) subunit, alpha type 7	Rn.105784	29674	Psma7
6.65599	6.83431	7.12007	6.69444	7.00579	7.20285	6.406	6.72962	6.86761	100.845	114.112	139.109	103.568	128.515	147.324	84.8004	106.125	116.777	0.147384	0.042079	0.136179	0.141877	0.139335	0.205624	0.142663	0.13013	0.132602	BE108780	1391550_at	Rad54 like 2 (S. cerevisiae)	Rn.21743	363135	Rad54l2
8.43189	8.991	8.7984	8.70747	9.1092	9.07655	8.58943	8.88071	8.85229	345.344	508.816	445.228	418.032	552.259	539.901	385.191	471.368	462.173	0.282624	0.056458	0.098018	0.087354	0.085756	0.05789	0.087967	0.165814	0.125698	NM_053425	1387038_at	Copper chaperone for superoxide dismutase	Rn.12311	84485	Ccs
10.7192	11.0699	11.007	10.4832	11.0488	10.8132	10.6115	11.0318	10.9026	1685.78	2149.67	2057.96	1431.39	2118.46	1799.28	1564.52	2093.64	1914.3	0.087457	0.030856	0.038457	0.026653	0.036948	0.067658	0.070443	0.087176	0.069669	AI232270	1371609_at	Homolog of zebrafish ES1	Rn.11498	294326	RGD1303003
9.54204	10.2573	10.1701	10.0231	10.1419	10.1927	9.85541	10.0724	10.1573	745.487	1223.93	1152.14	1040.53	1129.84	1170.33	926.348	1076.7	1141.96	0.323722	0.039608	0.044983	0.047564	0.063124	0.065335	0.106613	0.051337	0.043432	BG380728	1371667_at	Family with sequence similarity 20, member B	Rn.34667	304885	Fam20b
12.8538	13.3723	13.2114	13.1125	13.5059	13.4436	12.9521	13.3168	13.2373	7402.52	10603.8	9484.79	8856.37	11632.7	11141.1	7924.48	10203.7	9656.6	0.293297	0.042968	0.045348	0.042781	0.03929	0.032795	0.106677	0.069354	0.056563	BG381477	1371977_at	Actin related protein 2/3 complex, subunit 3	Rn.4233	288669	Arpc3
5.70192	6.34214	6.2275	6.11893	6.55376	6.29989	6.07318	6.50467	6.00812	52.0534	81.1287	74.9315	69.4995	93.946	78.7872	67.3301	90.8031	64.3612	0.11886	0.062257	0.103519	0.107042	0.102562	0.153791	0.092503	0.077951	0.171268	BE111277	1392568_at	Similar to TAF11 RNA polymerase II, TATA box binding protein (TBP)-associated factor	Rn.14073	303433	RGD1562272
11.1406	11.5143	11.411	10.9943	11.5447	11.3417	11.0557	11.4585	11.35	2257.64	2925.16	2723.04	2039.92	2987.45	2595.33	2128.62	2814.18	2610.3	0.090662	0.046527	0.042758	0.065573	0.044661	0.066088	0.066365	0.075151	0.045168	AI411198	1388381_at	Eukaryotic translation initiation factor 3, subunit G	Rn.107880	298700	Eif3g
2.88409	3.08623	3.45244	2.82685	2.92901	3.42178	2.87658	2.97803	3.45818	7.3824	8.49274	10.9468	7.09523	7.61588	10.7166	7.34407	7.8791	10.9905	0.095227	0.132428	0.245064	0.015989	0.074952	0.351976	0.069766	0.099094	0.310952	AW535316	1395452_at	Transcribed locus	Rn.207106	-	-
7.13116	7.6156	7.57652	6.7699	7.0989	7.19681	7.20652	7.48225	7.47347	140.182	196.121	190.88	109.13	137.082	146.709	147.699	178.806	177.721	0.200611	0.042764	0.078147	0.098267	0.071658	0.09459	0.083858	0.07976	0.072773	BG373974	1397551_at	DEAD (Asp-Glu-Ala-Asp) box polypeptide 27	Rn.206923	362274	Ddx27
4.65659	4.88388	5.50985	4.87938	4.85249	5.34233	4.83264	4.64691	5.47257	25.2216	29.5253	45.5649	29.4334	28.8898	40.5697	28.4951	25.053	44.4025	0.1074	0.118808	0.229053	0.111014	0.109575	0.376595	0.101173	0.116994	0.443433	BF390257	1394794_at	Coiled-coil domain containing 55	Rn.145937	303346	Ccdc55
6.48972	7.18303	7.07285	6.52209	6.78857	6.46693	6.67745	7.2038	6.75298	89.867	145.314	134.629	91.9062	110.551	88.4586	102.356	147.421	107.857	0.24592	0.15459	0.101889	0.148957	0.097906	0.092826	0.128438	0.115333	0.106865	AA925583	1393641_at	B-cell linker	Rn.32684	499356	Blnk
9.26638	9.56993	9.44023	8.39057	8.98905	8.81363	9.05305	9.54422	9.25682	615.826	760.039	694.692	335.593	508.129	449.953	531.177	746.615	611.759	0.115296	0.043184	0.155807	0.140358	0.154418	0.117077	0.149857	0.084116	0.154212	BE105837	1398533_at	Cytoplasmic FMR1 interacting protein 2	Rn.44008	303073	Cyfip2
6.4801	6.92305	7.11935	6.79866	6.91229	6.97631	6.62031	6.98918	7.05449	89.2698	121.352	139.039	111.327	120.45	125.915	98.3811	127.044	132.927	0.133755	0.081454	0.08204	0.057387	0.093579	0.078095	0.095077	0.074726	0.070173	BM392291	1379606_at	RAB30, member RAS oncogene family	Rn.161854	308821	Rab30
5.03522	5.46291	5.46808	5.28689	5.68103	5.20676	4.91234	5.3801	5.43121	32.7908	44.1062	44.2646	39.0402	51.3051	36.931	30.1135	41.6458	43.1476	0.136486	0.148011	0.102777	0.111952	0.173596	0.062442	0.127923	0.123174	0.111045	BF555171	1389974_at	Transcribed locus	Rn.163729	-	-
8.79007	9.21853	9.10712	8.77614	9.01189	9.14901	8.78269	9.15598	9.27619	442.665	595.736	551.463	438.411	516.237	567.71	440.406	570.459	620.028	0.124849	0.091613	0.092827	0.04836	0.089879	0.099301	0.090598	0.11276	0.097827	AI408833	1372693_at	Heterogeneous nuclear ribonucleoprotein A1	Rn.25771	29578	Hnrnpa1
7.06749	7.612	7.57604	7.21611	7.53534	7.67624	7.32222	7.41962	7.57653	134.13	195.632	190.816	148.684	185.508	204.54	160.032	171.21	190.881	0.130339	0.092211	0.125326	0.142985	0.080697	0.054601	0.1746	0.138828	0.147945	AI228084	1383622_at	Transcribed locus	Rn.204933	-	-
7.46837	7.94208	8.04112	7.54903	7.5477	8.05349	7.72077	7.79899	8.22282	177.094	245.926	263.402	187.277	187.104	265.67	210.952	222.705	298.755	0.238066	0.108823	0.07262	0.049481	0.092847	0.115819	0.166092	0.095097	0.115958	AI145497	1383611_at	Transcribed locus	Rn.23997	-	-
5.25859	5.14347	5.71039	5.18279	5.15776	5.86554	4.9568	5.28911	5.65902	38.2819	35.3459	52.3599	36.3225	35.6977	58.3047	31.056	39.1004	50.5283	0.388002	0.150744	0.110376	0.092849	0.086	0.164194	0.053004	0.115184	0.167202	AI230014	1378382_at	Phosphoglycerate mutase family member 5	Rn.23489	288731	Pgam5
11.8048	12.3106	12.188	11.7218	12.1367	11.974	11.9049	12.2409	12.2305	3577.66	5079.95	4666.1	3377.64	4503.09	4022.84	3834.71	4840.36	4805.6	0.27538	0.080953	0.080262	0.055852	0.047684	0.035744	0.134654	0.063573	0.120187	BI285599	1371375_at	Destrin	Rn.102412	502674	Dstn
6.22954	6.53225	6.46818	6.01124	6.46016	6.52021	6.01939	6.25454	6.48787	75.0375	92.5557	88.5352	64.5006	88.0444	91.7865	64.866	76.3491	89.7519	0.069644	0.10921	0.124737	0.113402	0.130318	0.108671	0.167667	0.117786	0.078367	AA799858	1386507_at	EST, Moderately similar to ODPB RAT PYRUVATE DEHYDROGENASE E1 COMPONENT BETA SUBUNIT, MITOCHONDRIAL PRECURSOR (R.norvegicus)	-	-	-
8.39221	8.67573	8.74126	8.33196	8.75687	8.71837	8.27656	8.5588	8.76467	335.975	408.936	427.939	322.233	432.594	421.202	310.094	377.099	434.939	0.163911	0.1136	0.07063	0.137474	0.080368	0.13326	0.121889	0.131406	0.116224	X62853	1368385_a_at	Growth factor receptor bound protein 2	Rn.3360	81504	Grb2
6.74117	7.22905	7.045	6.26095	6.60875	6.64664	6.72849	7.02334	7.12203	106.978	150.024	132.055	76.6891	97.596	100.193	106.042	130.088	139.298	0.068369	0.089817	0.070664	0.113148	0.10015	0.07097	0.04384	0.108412	0.061072	BF522747	1384219_at	Transcribed locus	Rn.32015	-	-
5.1995	5.27146	5.97856	5.11906	4.89081	5.77792	5.10259	4.97623	5.81662	36.7456	38.6249	63.0559	34.7529	29.6675	54.869	34.3584	31.4771	56.3608	0.172512	0.283137	0.251261	0.094614	0.101845	0.361889	0.231685	0.154537	0.398564	BE127046	1396463_at	Pinin, desmosome associated protein	Rn.38987	368070	Pnn
6.06709	6.18267	6.41683	5.65039	5.9535	6.18794	5.92428	6.23318	6.48423	67.0465	72.6389	85.4394	50.227	61.9701	72.9047	60.7276	75.2271	89.5257	0.127644	0.056454	0.102574	0.097438	0.082748	0.181897	0.082822	0.147905	0.180456	BE113611	1383091_at	Amyloid beta precursor protein (cytoplasmic tail) binding protein 2	Rn.104856	303396	Appbp2
9.65178	10.1769	9.87768	9.8347	10.4013	10.159	9.75705	10.1106	9.9416	804.406	1157.58	940.758	913.145	1352.39	1143.31	865.296	1105.59	983.376	0.189541	0.027445	0.077496	0.092241	0.051738	0.074545	0.102103	0.059191	0.070832	U36482	1387031_at	Endoplasmic reticulum protein 29	Rn.32904	117030	Erp29
12.6074	12.8324	13.0612	12.504	12.7175	12.9761	12.52	12.7352	13.1141	6240.3	7293.52	8546.99	5808.7	6735.18	8057.41	5873.48	6818.32	8866.2	0.225065	0.088422	0.121485	0.126927	0.086063	0.180857	0.117316	0.084536	0.158009	BG377042	1382150_at	Solute carrier family 25, member 46	Rn.12583	291709	Slc25a46
7.88913	8.44219	8.21793	7.90312	8.20584	8.20746	7.87017	8.15987	8.29251	237.064	347.818	297.744	239.374	295.26	295.591	233.968	286	313.541	0.130601	0.077343	0.108856	0.077593	0.096502	0.134652	0.116165	0.12592	0.120077	BI274476	1396142_at	Mitochondrial ribosomal protein S9	Rn.13913	301371	Mrps9
7.55899	7.99185	7.89088	7.0167	7.38738	7.30246	7.65949	8.01714	8.09298	188.574	254.558	237.351	129.49	167.426	157.855	202.179	259.06	273.042	0.111116	0.165294	0.099944	0.074891	0.072818	0.098812	0.070773	0.093746	0.09949	AW251317	1380725_at	Tetraspanin 5	Rn.98240	362048	Tspan5
2.81965	2.71818	3.3896	2.84666	3.06372	3.61846	2.71082	2.85019	3.15679	7.05991	6.58042	10.4802	7.19333	8.36126	12.2819	6.54694	7.21095	8.91843	0.150968	0.082051	0.239147	0.132856	0.127183	0.355275	0.050075	0.14084	0.296969	BF410536	1391138_at	Transcribed locus	Rn.160266	-	-
12.1078	12.8133	12.7634	12.7089	12.9561	12.768	12.5615	12.8065	12.7349	4413.78	7197.6	6952.9	6695.15	7946.48	6975.11	6044.89	7163.75	6816.9	0.278995	0.048385	0.097609	0.06174	0.048581	0.104344	0.07532	0.05676	0.060849	AA799501	1371308_at	Ribosomal protein S4, X-linked	Rn.40171	29426	Rps4x
8.62341	9.10614	8.90477	8.30581	8.77646	8.66775	8.55334	8.82055	8.88334	394.371	551.088	479.295	316.445	438.508	406.68	375.675	452.116	472.228	0.21329	0.062325	0.093107	0.126396	0.023526	0.147728	0.09034	0.116914	0.051934	AI172265	1389723_at	Phosphoinositide-3-kinase, regulatory subunit 4, p150	Rn.8917	363131	Pik3r4
7.41924	7.73007	7.53094	5.25527	5.9268	5.70696	7.26342	7.77787	7.2961	171.165	212.316	184.943	38.1939	60.8337	52.2355	153.641	219.468	157.161	0.130617	0.05658	0.110544	0.158232	0.092107	0.132129	0.114585	0.180171	0.173935	BM389391	1384329_at	Protease, serine, 22	Rn.137172	302971	Prss22
9.61556	9.96533	9.60835	9.39903	10.0262	9.76995	9.29663	9.76356	9.60787	784.462	999.685	780.551	675.134	1042.77	873.068	628.875	869.209	780.292	0.188737	0.055713	0.048595	0.052667	0.040043	0.064341	0.104517	0.090614	0.070734	BM383862	1372797_at	Polyglutamine binding protein 1	Rn.11769	302557	Pqbp1
10.4249	10.8519	10.7306	9.83073	10.104	10.2013	10.3364	10.6479	10.8265	1374.7	1848.19	1699.15	910.636	1100.54	1177.33	1292.9	1604.49	1815.94	0.125527	0.101324	0.102897	0.079957	0.059635	0.147495	0.097471	0.076328	0.091572	AI144986	1374427_at	Transcribed locus	Rn.94933	-	-
5.89411	6.12204	5.88919	5.55878	6.29848	6.13722	5.81033	6.27659	5.83009	59.4708	69.6494	59.2684	47.1367	78.7103	70.3862	56.1156	77.525	56.8895	0.15683	0.13262	0.178258	0.17429	0.076561	0.122767	0.120503	0.148037	0.128312	NM_031022	1368685_at	Chondroitin sulfate proteoglycan 4	Rn.10381	81651	Cspg4
10.7151	10.9245	10.9236	10.1935	10.6506	10.7501	10.4763	10.7845	10.8906	1681	1943.58	1942.37	1170.98	1607.5	1722.28	1424.56	1763.84	1898.44	0.098061	0.076005	0.142551	0.102829	0.066301	0.128377	0.142828	0.113259	0.102768	BF406819	1393074_at	Similar to hypothetical protein FLJ38984	Rn.9381	313595	RGD1563072
7.98629	8.58937	8.41121	8.21589	8.75638	8.54193	8.46029	8.64177	8.49051	253.579	385.175	340.429	297.324	432.447	372.715	352.209	399.422	359.665	0.253895	0.086895	0.047241	0.07071	0.081812	0.077752	0.057715	0.084285	0.036583	BE110607	1371807_at	Similar to apoptosis related protein APR-3; p18 protein	Rn.3206	298841	RGD1311605
9.15097	9.6885	9.51094	9.06464	9.40921	9.27852	9.19553	9.63668	9.46081	568.482	825.143	729.589	535.462	679.915	621.03	586.314	796.031	704.673	0.089075	0.06286	0.146923	0.093293	0.104016	0.106567	0.126026	0.122028	0.101814	AI411245	1372996_at	Transcribed locus, strongly similar to XP_001059344.1 PREDICTED: similar to isochorismatase domain containing 2 isoform 2 [Ra	Rn.216412	-	-
13.8557	14.4576	14.346	14.0416	14.3606	14.246	14.0955	14.3823	14.3326	14824.5	22499.4	20824.6	16863.3	21036.4	19430	17505.2	21355.2	20632.1	0.205697	0.053652	0.039353	0.075127	0.037801	0.055128	0.071981	0.051399	0.038609	NM_031969	1369937_at	Calmodulin 1	Rn.4166	24242	Calm1
7.84302	8.38151	8.0815	7.51632	8.06502	7.75492	7.88191	8.38329	7.92473	229.607	333.492	270.878	183.079	267.801	216.005	235.88	333.904	242.986	0.085381	0.047208	0.073133	0.075615	0.056463	0.08067	0.137362	0.036331	0.064986	BE097445	1390350_at	Small ArfGAP2	Rn.203765	298500	Smap2
11.3346	12.0867	11.8042	10.2436	10.6979	10.3069	11.5779	11.8394	11.6311	2582.58	4349.7	3576.17	1212.36	1661.07	1266.74	3057	3664.5	3171.83	0.096619	0.077558	0.058009	0.124645	0.102017	0.092564	0.101338	0.161068	0.059417	NM_017351	1387291_at	Inter-alpha trypsin inhibitor, heavy chain 3	Rn.89576	50693	Itih3
8.59466	8.64772	8.843	8.448	8.75645	8.99309	8.12574	8.45488	8.7495	386.59	401.073	459.207	349.222	432.468	509.554	279.313	350.891	430.39	0.07688	0.075294	0.124851	0.113929	0.091124	0.211897	0.171904	0.0877	0.070691	AI030449	1382233_a_at	Transcribed locus, strongly similar to NP_034922.1 methyltransferase like 1 [Mus musculus]	Rn.216446	-	-
8.77438	9.43406	9.42777	9.20403	9.40973	9.468	9.16969	9.26709	9.36005	437.876	691.727	688.718	589.779	680.16	708.194	575.906	616.13	657.137	0.290455	0.07173	0.032301	0.103107	0.063022	0.051421	0.101331	0.070163	0.074371	BI284422	1373080_at	Poly (A) polymerase alpha	Rn.3455	314417	Papola
7.63911	8.10002	7.89162	7.4677	7.92002	7.63704	7.61808	8.09843	7.95316	199.343	274.378	237.473	177.012	242.194	199.057	196.458	274.076	247.822	0.080146	0.101451	0.144135	0.100124	0.124742	0.132911	0.152671	0.125137	0.12231	AW144812	1383551_at	2,3-bisphosphoglycerate mutase	Rn.204528	296973	Bpgm
9.13812	9.61504	9.28518	8.7377	9.34373	8.69605	8.82833	9.39602	9.14004	563.441	784.179	623.904	426.884	649.745	414.736	454.561	673.727	564.191	0.073777	0.15503	0.187256	0.133286	0.229959	0.138915	0.103394	0.155165	0.118377	AI071071	1393268_at	Transcribed locus	Rn.166415	-	-
8.20515	8.61597	8.81047	8.03703	8.15684	8.39117	8.21224	8.50981	8.55747	295.118	392.343	448.968	262.656	285.4	335.733	296.572	364.509	376.752	0.17887	0.085475	0.144073	0.098316	0.122616	0.197912	0.123913	0.149522	0.091718	AI704849	1394820_at	Transcribed locus	Rn.21256	-	-
10.3999	10.7701	10.663	10.3879	10.8122	10.7874	10.3353	10.7231	10.6596	1351.08	1746.32	1621.37	1339.89	1798.03	1767.38	1291.92	1690.34	1617.56	0.173136	0.084425	0.071599	0.120792	0.091582	0.113212	0.141356	0.082473	0.060153	AI044239	1388180_at	Phosphorylated adaptor for RNA export	Rn.10317	286917	Phax
10.7769	10.9774	10.8494	10.2728	10.7979	10.8026	10.4378	10.7855	10.8787	1754.57	2016.17	1844.99	1237.15	1780.29	1786.1	1387.05	1765.06	1882.85	0.155992	0.112045	0.057146	0.092716	0.084545	0.088548	0.158035	0.11468	0.068503	AA944552	1389667_at	Similar to Protein C6orf203	Rn.202623	683897	LOC683897
6.80978	7.41584	7.24799	7.26412	7.47158	7.46546	6.93339	7.28793	7.25836	112.188	170.762	152.007	153.716	177.488	176.737	122.225	156.274	153.103	0.111757	0.023447	0.085701	0.063173	0.10946	0.0546	0.111412	0.084265	0.049626	NM_024135	1387090_a_at	LIM domain kinase 2	Rn.11013	29524	Limk2
8.74757	8.95534	9.04489	8.16959	8.43355	8.67007	8.37969	8.83835	8.80081	429.814	496.393	528.182	287.933	345.742	407.334	333.072	457.729	445.972	0.138656	0.04725	0.069302	0.051576	0.120645	0.142404	0.111182	0.124185	0.103865	AW523485	1384463_at	ESTs	-	-	-
11.753	12.3361	12.2235	12.0518	12.4253	12.2618	12.021	12.3322	12.2037	3451.48	5170.54	4782.34	4245.74	5500.32	4911	4156.06	5156.58	4717.15	0.317409	0.03034	0.046502	0.020782	0.03836	0.047673	0.059402	0.041963	0.023211	BM986259	1371758_at	Ubiquitin-fold modifier conjugating enzyme 1	Rn.8050	445268	Ufc1
9.68089	10.1814	9.91482	9.47685	9.99133	9.81666	9.75102	10.1346	9.91617	820.802	1161.2	965.291	712.551	1017.86	901.798	861.687	1124.14	966.195	0.068238	0.036514	0.045157	0.073197	0.051606	0.089985	0.104884	0.052514	0.048731	BI289613	1372600_at	F-box protein 31	Rn.163412	498959	Fbxo31
7.07568	7.10786	7.37425	7.04928	7.45349	7.82107	6.91472	7.02688	7.34288	134.894	137.936	165.909	132.448	175.277	226.14	120.653	130.407	162.341	0.124173	0.169445	0.12426	0.248314	0.076897	0.080916	0.192911	0.162318	0.050201	H33080	1382754_at	Transcribed locus	Rn.14621	-	-
6.42733	6.48725	6.81546	6.17266	6.6472	6.55194	6.30706	6.54537	6.88105	86.0635	89.7133	112.631	72.1366	100.232	93.8276	79.1798	93.4013	117.87	0.275747	0.161478	0.029299	0.111107	0.056722	0.146788	0.100511	0.08124	0.091042	AI103106	1373897_at	Lamin B1	Rn.11362	116685	Lmnb1
7.97562	8.34859	8.22583	8.12525	8.52115	8.53558	7.87842	8.24525	8.2451	251.71	325.969	299.379	279.218	367.385	371.078	235.31	303.436	303.405	0.071628	0.077119	0.054149	0.082678	0.081689	0.074339	0.106993	0.065322	0.04418	BF413854	1390264_at	Similar to RIKEN cDNA 1200014J11	Rn.13279	360563	RGD1308139
6.98235	7.27322	7.51164	7.0837	7.47186	7.53637	7.2069	7.40878	7.4859	126.444	154.688	182.486	135.646	177.523	185.641	147.738	169.928	179.259	0.197165	0.089877	0.148526	0.121729	0.127162	0.12016	0.057397	0.112424	0.140896	BI288196	1377042_at	Polycomb group ring finger 5	Rn.31865	681178	Pcgf5
8.06194	8.3911	8.29412	8.60823	9.0337	9.0583	7.95698	8.40669	8.21877	267.23	335.717	313.891	390.243	524.101	533.114	248.479	339.364	297.918	0.119156	0.076209	0.075508	0.118339	0.096526	0.093766	0.112535	0.09688	0.082536	BF400666	1376721_at	Transcribed locus	Rn.204916	-	-
4.95634	5.41871	5.31048	4.70916	4.99986	5.05696	5.01793	5.41702	5.32084	31.0461	42.7754	39.6838	26.1576	31.9969	33.2887	32.4002	42.7253	39.9698	0.105782	0.104893	0.107619	0.048913	0.076328	0.064511	0.085412	0.092767	0.059279	AI598720	1378238_at	Anaphase promoting complex subunit 1	Rn.8	311412	Anapc1
7.82533	7.86928	8.0378	6.95868	7.24871	7.56824	7.50657	7.87336	8.06621	226.808	233.824	262.796	124.386	152.082	189.787	181.846	234.486	268.022	0.20974	0.122541	0.089445	0.106897	0.213304	0.132793	0.078113	0.139622	0.113662	BI303187	1385291_a_at	Synaptonemal complex protein SC65	Rn.90100	59101	Sc65
10.0719	10.5815	10.3646	10.1784	10.5008	10.4672	10.0421	10.3867	10.4294	1076.33	1532.32	1318.43	1158.79	1448.96	1415.6	1054.32	1338.78	1378.99	0.140705	0.042549	0.124296	0.056584	0.085229	0.055135	0.147153	0.077814	0.050884	AI500737	1393431_at	Similar to Splicing factor U2AF 35 kDa subunit (U2 auxiliary factor 35 kDa subunit) (U2 snRNP auxiliary factor small subunit)	Rn.216659	687575	LOC687575
6.70099	7.1104	7.03952	6.52087	6.7573	6.97342	6.63015	6.90329	7.06386	104.04	138.18	131.555	91.8285	108.181	125.663	99.0545	119.701	133.793	0.134381	0.115272	0.053563	0.076945	0.085116	0.047151	0.151238	0.1029	0.130295	AA892868	1386176_at	Family with sequence similarity 160, member B2	Rn.124637	306015	Fam160b2
8.54581	9.10812	8.72979	8.49706	8.74251	8.80142	8.49723	8.93408	8.88782	373.719	551.845	424.55	361.302	428.31	446.161	361.344	489.132	473.697	0.203229	0.062264	0.09661	0.072843	0.07574	0.066496	0.079998	0.06981	0.078981	AI071247	1392165_at	Inhibitor of growth family, member 2	Rn.20482	290744	Ing2
7.00684	7.50106	7.21429	5.88241	6.26731	6.01919	6.90235	7.33032	7.37067	128.608	181.152	148.497	58.9905	77.0279	64.857	119.623	160.933	165.498	0.109386	0.07732	0.133264	0.113394	0.077014	0.145849	0.060601	0.10677	0.137133	BI291880	1391530_a_at	3-oxoacyl-ACP synthase, mitochondrial	Rn.24121	289934	Oxsm
5.28977	5.32163	5.70451	5.00594	5.11834	5.66854	5.03407	5.22355	5.65375	39.1183	39.9917	52.1469	32.132	34.7355	50.8628	32.7647	37.3633	50.3441	0.123772	0.101528	0.248494	0.16314	0.111063	0.275574	0.096655	0.107526	0.167019	BE106279	1381713_at	Transcribed locus	Rn.199791	-	-
5.01299	5.53746	5.44763	4.77793	5.16903	5.19435	5.24649	5.51869	5.31863	32.2894	46.4453	43.6415	27.4347	35.9777	36.6147	37.9622	45.8449	39.9087	0.128056	0.102386	0.090867	0.134273	0.100653	0.075473	0.092149	0.119581	0.112911	AI028905	1388193_at	Huntingtin interacting protein 1	Rn.836	192154	Hip1
12.0378	12.643	12.4463	12.1786	12.6531	12.3712	12.3274	12.7107	12.3361	4204.74	6396.2	5580.97	4635.79	6441.14	5297.88	5139.46	6703.51	5170.54	0.137316	0.082999	0.084451	0.071658	0.071844	0.139601	0.090539	0.055875	0.093844	NM_031102	1367623_at	Ribosomal protein L18	Rn.484	81766	Rpl18
8.29047	8.7798	8.60823	8.605	8.90023	9.0004	8.35061	8.5768	8.76004	313.098	439.525	390.243	389.371	477.789	512.142	326.426	381.834	433.546	0.070916	0.080068	0.102112	0.032604	0.078598	0.093178	0.1066	0.140331	0.097389	NM_021663	1370000_at	Nucleobindin 2	Rn.41602	59295	Nucb2
5.81154	5.85999	6.17555	6.04784	6.50544	6.9239	5.84624	5.66142	6.20329	56.1627	58.0808	72.2813	66.1578	90.8516	121.423	57.5299	50.6124	73.6845	0.201056	0.25596	0.094908	0.114343	0.254994	0.133003	0.088305	0.161921	0.166861	BM385741	1377163_at	Inhibin beta-B	Rn.35074	25196	Inhbb
9.91649	10.3993	10.1936	9.79961	10.2751	10.1423	10.009	10.27	10.2968	966.409	1350.52	1171.06	891.203	1239.12	1130.15	1030.41	1234.75	1257.9	0.250268	0.078662	0.090975	0.095014	0.076304	0.039935	0.116246	0.141938	0.105703	BF289020	1376705_a_at	RAB24, member RAS oncogene family	Rn.6295	361208	Rab24
9.24316	9.61256	9.66279	8.88855	9.34981	9.37554	9.42242	9.57748	9.64138	605.994	782.833	810.568	473.937	652.489	664.23	686.169	764.027	798.628	0.20505	0.076405	0.063864	0.077532	0.049536	0.043534	0.077013	0.050763	0.070193	NM_130412	1387778_at	Stromal cell derived factor 4	Rn.12964	155173	Sdf4
10.7915	11.1048	11.1387	10.061	10.4352	10.4299	10.7837	11.0937	11.2081	1772.41	2202.31	2254.67	1068.23	1384.55	1379.47	1762.86	2185.43	2365.78	0.145235	0.075962	0.082705	0.055997	0.075333	0.097295	0.09383	0.054733	0.079905	AI412013	1372741_at	Saccharopine dehydrogenase (putative)	Rn.23989	305021	Sccpdh
9.80822	10.239	9.94626	9.5053	9.92615	9.89731	9.63195	10.1662	9.80989	896.537	1208.5	986.558	726.742	972.902	953.646	793.425	1149.03	897.576	0.06578	0.062523	0.055627	0.052471	0.067833	0.073233	0.130079	0.083927	0.082287	AA955445	1393125_a_at	Splicing factor, arginine/serine-rich 14	Rn.8664	361126	Sfrs14
7.52743	8.06429	7.71881	7.26979	7.59655	7.6308	7.65194	8.07209	7.92138	184.494	267.666	210.665	154.321	193.548	198.198	201.124	269.117	242.423	0.242328	0.093401	0.080521	0.069109	0.082114	0.093251	0.083099	0.119857	0.105702	BI277527	1370842_at	Branched chain ketoacid dehydrogenase kinase	Rn.31976	29603	Bckdk
8.38177	8.74696	8.67405	8.3292	8.80896	8.71435	8.33702	8.75147	8.50936	333.552	429.633	408.46	321.617	448.499	420.03	323.365	430.978	364.395	0.109257	0.09238	0.140144	0.072404	0.059941	0.090434	0.138518	0.096698	0.099746	AA818971	1375220_at	NADH dehydrogenase (ubiquinone) 1 alpha subcomplex 11	Rn.96380	301123	Ndufa11
9.96302	10.1583	10.1601	9.17791	9.53275	9.77721	9.62604	9.94135	10.0507	998.086	1142.75	1144.18	579.197	740.702	877.472	790.181	983.206	1060.63	0.078283	0.039512	0.141229	0.149656	0.060219	0.114168	0.143593	0.075646	0.105432	BE329352	1373438_at	Transcribed locus	Rn.137727	-	-
10.7695	11.2154	11.1903	10.1458	10.6061	10.3196	10.9096	11.1721	11.2446	1745.59	2377.78	2336.77	1132.9	1558.67	1277.94	1923.61	2307.48	2426.4	0.199477	0.080015	0.050728	0.069527	0.089306	0.082509	0.057793	0.070376	0.040209	AI413052	1373448_at	Acylphosphatase 1, erythrocyte (common) type	Rn.3465	299203	Acyp1
3.68103	3.70136	4.43843	4.03465	4.28256	4.42472	3.6677	3.84724	4.07755	12.8263	13.0083	21.6821	16.3889	19.4616	21.477	12.7083	14.3924	16.8836	0.23899	0.050279	0.143382	0.092124	0.101007	0.274421	0.082377	0.16017	0.171855	NM_024373	1369269_at	UDP-N-acetyl-alpha-D-galactosamine:polypeptide N-acetylgalactosaminyltransferase 1 (GalNAc-T1)	Rn.10266	79214	Galnt1
6.76123	7.12127	7.27589	7.2067	7.42131	7.61681	6.8167	6.8978	7.30677	108.476	139.225	154.975	147.718	171.41	196.286	112.728	119.246	158.328	0.239226	0.070331	0.149345	0.06868	0.106676	0.172009	0.104381	0.072639	0.150112	AF203907	1387666_at	G protein-coupled receptor 85	Rn.53985	64020	Gpr85
7.52135	7.51428	8.12864	7.99597	7.81207	8.4972	7.25316	7.29195	8.11843	183.718	182.82	279.875	255.286	224.733	361.337	152.552	156.71	277.902	0.256717	0.201297	0.27603	0.19594	0.167411	0.276903	0.142613	0.18586	0.297346	AI144648	1394412_at	Transmembrane protein 16C	Rn.216624	311287	Tmem16c
11.5506	12.1519	12.2527	11.9235	12.1485	12.104	12.1051	12.2035	12.2978	2999.69	4550.79	4880.12	3884.46	4540.07	4402.17	4405.53	4716.5	5035.08	0.223051	0.045745	0.10499	0.089601	0.023075	0.100503	0.083107	0.033029	0.070845	BI280270	1371355_at	Transcribed locus, strongly similar to NP_080979.1 NADH dehydrogenase (ubiquinone) 1 alpha subcomplex, 8 [Mus musculus]	Rn.1128	-	-
11.6027	12.0242	11.8911	10.7385	10.939	11.0899	11.5442	11.9518	11.9723	3110	4165.29	3798.2	1708.48	1963.21	2179.68	2986.42	3961.41	4018.11	0.14998	0.034586	0.107993	0.06844	0.084718	0.042179	0.114727	0.045181	0.087916	AI102382	1398406_at	Transcribed locus	Rn.127735	-	-
7.72135	8.1079	8.24973	7.4129	7.70039	7.79483	7.86122	7.96152	8.25176	211.037	275.881	304.38	170.414	207.993	222.064	232.521	249.262	304.809	0.14655	0.034129	0.102521	0.101488	0.027232	0.151882	0.077659	0.121035	0.130534	BI274544	1372567_at	R3H domain and coiled-coil containing 1	Rn.30496	361064	R3hcc1
7.16115	7.21102	7.595	7.00374	7.20353	7.49935	6.96126	7.45149	7.34742	143.127	148.161	193.34	128.332	147.394	180.938	124.609	175.034	162.852	0.055819	0.064697	0.09987	0.089566	0.104506	0.119048	0.123553	0.161294	0.101784	AI549208	1379425_at	Defects in morphology 1 homolog (S. cerevisiae)	Rn.35470	313563	Dem1
5.0126	5.45925	5.39587	4.24623	4.69646	4.42268	5.07205	5.3176	5.45576	32.2807	43.9945	42.1036	18.9777	25.9284	21.4466	33.6387	39.8802	43.8882	0.192164	0.095649	0.123734	0.122187	0.170289	0.126838	0.062093	0.094681	0.086547	AI599126	1383292_at	Inner centromere protein	Rn.92193	293733	Incenp
4.58954	4.98926	4.62956	4.00636	4.5181	4.53039	4.50697	4.96876	4.59826	24.0763	31.7627	24.7535	16.0707	22.9131	23.1091	22.737	31.3145	24.2222	0.078076	0.108551	0.189775	0.209427	0.073768	0.11973	0.135853	0.129172	0.116004	BM390846	1378617_at	Transcriptional regulating factor 1	Rn.91677	316219	Trerf1
11.8049	12.5284	12.3695	12.1054	12.3161	12.1535	12.1974	12.4429	12.3944	3577.91	5907.78	5291.64	4406.45	5099.36	4555.84	4696.6	5567.83	5383.77	0.296275	0.037395	0.068345	0.09825	0.083515	0.054764	0.078635	0.055822	0.062341	NM_031149	1367833_at	Proteasome (prosome, macropain) 26S subunit, ATPase, 5	Rn.10972	81827	Psmc5
6.21676	6.88558	6.56773	6.90991	7.34056	7.00061	6.56856	6.9666	6.64469	74.3757	118.24	94.8601	120.251	162.08	128.054	94.9147	125.071	100.058	0.142764	0.082587	0.079434	0.086985	0.068038	0.133177	0.096914	0.083366	0.074159	NM_022547	1368378_at	Aldehyde dehydrogenase 1 family, member L1	Rn.2328	64392	Aldh1l1
3.7906	3.76345	4.09312	3.53916	3.59624	3.89139	3.47628	3.58891	4.50182	13.8383	13.5804	17.0668	11.625	12.0942	14.8397	11.1292	12.0329	22.656	0.170152	0.106716	0.173956	0.094065	0.050781	0.248214	0.043484	0.027969	0.32147	BF390761	1385364_at	Transcribed locus	Rn.172572	-	-
6.55545	7.15251	7.12695	7.62865	7.88229	8.00204	6.87809	6.97783	7.00048	94.0561	142.272	139.774	197.903	235.942	256.362	117.628	126.048	128.043	0.159213	0.113209	0.062749	0.114803	0.107112	0.03055	0.063318	0.057545	0.041782	BF417765	1391507_at	Zinc finger protein 467	Rn.27249	500110	Znf467
8.03899	8.58921	8.21244	7.72446	8.17492	8.03524	8.01917	8.33838	8.28191	263.013	385.132	296.613	211.492	288.999	262.33	259.424	323.67	311.246	0.233179	0.051763	0.107843	0.110523	0.07303	0.095335	0.124249	0.052919	0.110779	BI285570	1388934_at	Vacuolar protein sorting 16 homolog (S. cerevisiae)	Rn.14968	296159	Vps16
8.31475	8.5458	8.39937	7.45256	7.99617	7.74377	8.0091	8.46607	8.44982	318.412	373.716	337.647	175.164	255.321	214.342	257.62	353.623	349.663	0.139665	0.094401	0.135825	0.080546	0.06528	0.155796	0.073701	0.100758	0.137975	BM389226	1388363_at	RNA binding protein, autoantigenic (hnRNP-associated with lethal yellow homolog (mouse))	Rn.162714	296301	Raly
8.93349	9.06907	9.21169	8.69024	8.90419	9.23977	8.67493	8.94857	9.25968	488.932	537.109	592.918	413.069	479.102	604.572	408.709	494.069	612.973	0.119965	0.077693	0.192677	0.175325	0.099016	0.172461	0.122904	0.048998	0.13467	BF387238	1394760_at	Similar to KIAA1409 protein	Rn.43444	314401	RGD1311117
4.89253	4.93041	5.35114	5.34729	5.46054	5.88659	4.68999	4.64496	5.48728	29.7029	30.4931	40.8182	40.7094	44.0338	59.1616	25.8124	25.0191	44.8576	0.12878	0.200452	0.183479	0.245507	0.241153	0.303999	0.09505	0.142792	0.08519	BG671576	1396105_at	Transcribed locus, strongly similar to NP_598773.1 mbt domain containing 1 [Mus musculus]	Rn.17921	-	-
5.87101	5.94707	6.3578	5.61081	5.57464	6.3825	5.64124	5.61915	6.24416	58.5262	61.6945	82.0141	48.8677	47.6578	83.4303	49.9094	49.151	75.8018	0.128409	0.072523	0.247293	0.154653	0.181428	0.280733	0.144668	0.115576	0.238996	BI294889	1390719_at	Transcribed locus	Rn.177411	-	-
11.9046	12.2004	12.4415	12.1231	12.3688	12.4899	11.9763	12.0955	12.4635	3833.91	4706.37	5562.43	4460.84	5289.08	5752.21	4029.26	4376.31	5647.9	0.308857	0.084544	0.084775	0.113486	0.047119	0.110951	0.109826	0.109762	0.075051	NM_130405	1398773_at	KH domain containing, RNA binding, signal transduction associated 1	Rn.162107	117268	Khdrbs1
11.5441	11.8334	12.2396	11.4916	11.488	11.9066	11.7478	11.6308	12.3769	2986.21	3649.29	4836	2879.49	2872.32	3839.23	3439.06	3171.17	5318.86	0.382941	0.139403	0.128855	0.12218	0.112369	0.161094	0.130517	0.169789	0.145728	AI178772	1370243_a_at	Prothymosin alpha	Rn.817	29222	Ptma
4.80535	4.99918	5.35484	4.24947	4.10336	4.70882	4.60504	4.80219	5.2895	27.9611	31.9818	40.923	19.0203	17.1884	26.1515	24.3363	27.8999	39.1109	0.259821	0.123015	0.204226	0.129403	0.096222	0.259184	0.141471	0.177712	0.211127	BF389884	1390193_at	Transcribed locus	Rn.30123	-	-
5.24018	5.0733	5.68408	5.30759	5.32928	5.96647	4.97059	5.06358	5.7589	37.7965	33.6679	51.4137	39.6044	40.2044	62.5297	31.3543	33.4418	54.1504	0.218195	0.13835	0.276054	0.196787	0.15878	0.296568	0.092758	0.145079	0.360263	BF283433	1376175_at	Glioblastoma amplified sequence	Rn.203179	498174	Gbas
9.21524	9.85771	9.49259	9.08105	9.49915	9.24356	9.32644	9.65021	9.53611	594.379	927.826	720.368	541.587	723.651	606.162	642.005	803.531	742.429	0.191765	0.060601	0.036708	0.045572	0.053294	0.088569	0.102574	0.102312	0.084316	BM384191	1373840_at	Nudix (nucleoside diphosphate linked moiety X)-type motif 9	Rn.22103	305149	Nudt9
8.7825	9.22185	9.19689	8.49863	8.73982	8.81469	8.88373	9.19561	9.23781	440.348	597.109	586.867	361.695	427.512	450.284	472.356	586.347	603.751	0.205294	0.062986	0.100651	0.074299	0.091301	0.093781	0.084275	0.076645	0.100145	AI410336	1375024_at	TRNA-yW synthesizing protein 3 homolog (S. cerevisiae)	Rn.43835	499731	Tyw3
4.32108	4.28855	4.87022	3.75015	3.97688	4.12737	4.18531	4.17354	4.97793	19.9882	19.5426	29.2471	13.4557	15.7456	17.4768	18.193	18.0452	31.5142	0.170769	0.073789	0.24112	0.126249	0.071677	0.18527	0.104773	0.089344	0.235374	AI179450	1378457_at	Transcribed locus	Rn.34019	-	-
6.71052	6.98772	7.31313	5.70049	5.768	6.10747	6.66774	6.67604	7.27355	104.729	126.915	159.027	52.0018	54.493	68.9496	101.669	102.256	154.724	0.208209	0.087406	0.162003	0.151938	0.092491	0.15709	0.074299	0.160589	0.055699	BF404398	1391147_at	Transcribed locus	Rn.199635	-	-
7.29095	7.7498	7.7686	7.60083	7.79345	8.06059	7.42054	7.54201	7.75235	156.601	215.24	218.063	194.123	221.851	266.98	171.319	186.368	215.62	0.249382	0.075115	0.046051	0.086688	0.07405	0.124455	0.104292	0.092869	0.039546	AW433899	1396401_at	RNA binding motif protein 17	Rn.20694	291295	Rbm17
11.7403	12.4669	12.2467	12.1721	12.5111	12.1989	12.1468	12.4598	12.187	3421.23	5661.23	4859.86	4614.95	5837.36	4701.48	4534.73	5633.44	4662.86	0.32707	0.052182	0.130817	0.050716	0.086334	0.100247	0.097802	0.053846	0.071698	BI279561	1371435_at	Nascent-polypeptide-associated complex alpha polypeptide	Rn.219226	288770	Naca
8.44261	8.97854	8.74067	8.25095	8.68155	8.48994	8.50031	8.86229	8.68499	347.92	504.44	427.764	304.638	410.589	359.523	362.116	465.388	411.569	0.188038	0.10019	0.104349	0.090561	0.066701	0.086707	0.096456	0.087664	0.074656	BM389296	1371809_at	Mitochondrial ribosomal protein S18B	Rn.114	294230	Mrps18b
10.4119	10.7013	10.7254	11.0606	11.3146	11.5452	10.3399	10.6912	10.7086	1362.37	1664.99	1693.04	2135.86	2547.03	2988.49	1296.04	1653.38	1673.44	0.091915	0.096321	0.127597	0.135441	0.092932	0.071369	0.154815	0.087687	0.116954	BF284510	1382225_at	Transcribed locus	Rn.25185	-	-
7.80825	8.26216	8.4064	8.27075	8.40224	8.47957	8.07058	8.3172	8.45086	224.139	307.014	339.296	308.847	338.319	356.948	268.836	318.953	349.915	0.219903	0.05099	0.084506	0.073489	0.085394	0.097255	0.110859	0.098639	0.080605	NM_053990	1368361_a_at	Protein tyrosine phosphatase, non-receptor type 2	Rn.33497	117063	Ptpn2
8.71888	9.25451	8.85477	8.42142	8.9558	8.59205	8.67233	9.05138	8.93313	421.351	610.78	462.968	342.847	496.552	385.891	407.973	530.563	488.81	0.073977	0.055813	0.109298	0.144111	0.097319	0.067829	0.112059	0.108796	0.044471	BE101624	1371907_at	ADP-ribosylation-like factor 6 interacting protein 4	Rn.105729	288656	Arl6ip4
10.3469	10.8213	10.8026	10.4132	10.7054	10.6048	10.4917	10.8323	10.7868	1302.35	1809.41	1786.1	1363.6	1669.73	1557.27	1439.85	1823.25	1766.65	0.200788	0.039471	0.069541	0.02961	0.057996	0.078429	0.072179	0.064705	0.063613	BE329043	1389178_at	Neugrin, neurite outgrowth associated	Rn.1278	499191	Ngrn
9.22792	9.62528	9.58722	8.88522	9.16681	9.24512	9.18421	9.48945	9.54724	599.626	789.765	769.203	472.844	574.758	606.818	581.732	718.802	748.179	0.123764	0.050556	0.061459	0.066836	0.055546	0.067479	0.087441	0.054689	0.058997	AI171229	1372456_at	Mitochondrial ribosomal protein S31	Rn.22173	290850	Mrps31
9.33492	9.78753	9.81578	9.44872	9.60082	9.85198	9.42726	9.63966	9.76536	645.789	883.772	901.248	698.792	776.488	924.148	688.475	797.677	870.295	0.180598	0.044962	0.108394	0.054453	0.037217	0.099935	0.041066	0.072408	0.034748	BI292524	1379327_at	SWI/SNF related, matrix associated, actin dependent regulator of chromatin, subfamily a, member 5	Rn.221918	307766	Smarca5
10.4902	11.0415	10.974	10.7144	10.9625	11.0459	10.708	10.8952	10.9344	1438.35	2107.77	2011.42	1680.18	1995.45	2114.21	1672.74	1904.5	1956.96	0.218926	0.047349	0.059201	0.034717	0.080423	0.056589	0.089186	0.064927	0.074892	AW433973	1373824_at	Craniofacial development protein 1	Rn.128746	292027	Cfdp1
10.1863	10.3717	10.5768	10.3214	10.7464	10.788	10.2521	10.5091	10.5726	1165.15	1324.93	1527.33	1279.53	1717.86	1768.12	1219.52	1457.32	1522.89	0.090994	0.078425	0.084769	0.099349	0.182076	0.086483	0.087856	0.074113	0.041912	BG372885	1371341_at	Small nuclear ribonucleoprotein D2	Rn.145735	680309	Snrpd2
9.25531	9.85025	9.84283	9.54655	9.75567	9.77666	9.59608	9.81135	9.74684	611.119	923.04	918.305	747.821	864.469	877.138	773.941	898.485	859.194	0.268967	0.061376	0.060934	0.024719	0.091276	0.096758	0.043695	0.047381	0.113878	AI230689	1373454_at	Similar to RIKEN cDNA 0610037P05	Rn.3055	360461	RGD1305823
10.6501	11.0428	10.8426	10.1311	10.5429	10.4161	10.5368	10.936	10.9026	1606.94	2109.67	1836.32	1121.41	1491.86	1366.34	1485.57	1959.13	1914.3	0.108718	0.06853	0.099338	0.054028	0.043652	0.069063	0.138783	0.066305	0.061527	NM_022592	1386859_at	Transketolase	Rn.5950	64524	Tkt
12.3319	12.6125	12.9326	12.6409	12.656	13.0242	12.4061	12.469	13.0111	5155.51	6262.4	7818.09	6386.9	6454.1	8330.57	5427.6	5669.48	8255.27	0.275657	0.116747	0.108851	0.11974	0.07998	0.183106	0.111086	0.160919	0.146487	BF284791	1379371_at	Transcribed locus	Rn.25117	-	-
6.48284	6.71891	6.40673	6.09089	6.69793	6.39979	6.15672	6.76868	6.41165	89.4395	105.34	84.8434	68.1617	103.819	84.4362	71.344	109.037	85.1332	0.232623	0.092836	0.068967	0.0527	0.073159	0.058546	0.093994	0.055446	0.067947	AI171365	1374332_at	DEAD (Asp-Glu-Ala-Asp) box polypeptide 49	Rn.95332	290660	Ddx49
9.36349	9.45757	9.49431	8.95123	9.3901	9.40925	9.10506	9.46002	9.62911	658.706	703.092	721.227	494.981	670.968	679.934	550.676	704.287	791.865	0.133838	0.122855	0.135299	0.066006	0.110162	0.091972	0.107703	0.015791	0.115424	AW523520	1380030_at	Zinc finger protein 593	Rn.147537	298546	Znf593
6.03874	6.06066	6.20907	6.30121	6.43016	6.75736	5.76055	6.22451	6.45225	65.7418	66.7483	73.9803	78.8594	86.2325	108.185	54.2124	74.7763	87.563	0.106448	0.148783	0.11695	0.127767	0.048376	0.179436	0.105915	0.142047	0.166386	BI275403	1379253_at	Transcribed locus	Rn.166556	-	-
3.94279	4.35917	4.45074	4.07491	4.28713	4.51448	4.02627	4.2517	4.23856	15.3779	20.523	21.8679	16.8527	19.5234	22.8557	16.294	19.0497	18.877	0.182178	0.176963	0.091037	0.092161	0.050457	0.142509	0.075223	0.096822	0.119862	BF399464	1398746_at	N-acetylneuraminic acid phosphatase	Rn.210573	311530	Nanp
7.14661	7.56478	7.71097	8.03841	8.06726	8.30789	7.55996	7.86022	7.96738	141.692	189.333	209.524	262.907	268.218	316.901	188.701	232.36	250.277	0.073164	0.139714	0.045004	0.12875	0.104375	0.16461	0.137913	0.120346	0.105163	BE103440	1373651_at	Transcribed locus	Rn.169388	-	-
8.89113	9.56501	9.33259	9.31502	9.6952	9.34412	9.22565	9.57982	9.28668	474.785	757.452	644.747	636.943	828.984	649.921	598.684	765.267	624.553	0.207831	0.049396	0.106852	0.134875	0.09735	0.132836	0.136708	0.083769	0.069536	BF388220	1379367_at	Similar to RIKEN cDNA 2810405K02	Rn.27527	362676	RGD1308251
3.96584	4.22508	4.2522	3.88533	4.28313	4.28734	3.88684	4.34464	4.10821	15.6256	18.7015	19.0564	14.7775	19.4693	19.5262	14.793	20.3173	17.2462	0.050257	0.103309	0.119338	0.109183	0.128977	0.134535	0.165107	0.101212	0.157141	AW253760	1374409_at	TAF6-like RNA polymerase II, p300/CBP-associated factor (PCAF)-associated factor	Rn.137034	309194	Taf6l
8.55878	8.82727	9.1645	10.0414	10.2695	10.4971	8.74412	8.75306	9.14349	377.094	454.227	573.838	1053.81	1234.32	1445.25	428.788	431.453	565.542	0.317656	0.090312	0.073891	0.101427	0.112246	0.163072	0.140022	0.083772	0.070413	BM389650	1389181_at	CDNA clone IMAGE:7383125	Rn.205765	-	-
5.66749	6.31977	6.03834	5.00802	5.23344	5.18002	5.90688	6.39966	5.94349	50.8258	79.8804	65.7236	32.1784	37.6203	36.2528	59.9996	84.4286	61.5416	0.074595	0.089496	0.089397	0.155248	0.173864	0.16172	0.117899	0.055852	0.144966	AW523396	1396821_at	Transcribed locus	Rn.45624	-	-
5.44677	6.00351	5.86395	5.59047	5.89718	5.82055	5.53653	5.85951	5.70752	43.6155	64.1559	58.2405	48.1836	59.5975	56.5145	46.4153	58.0615	52.2558	0.145269	0.076755	0.162351	0.089989	0.116293	0.095842	0.106664	0.106827	0.13003	NM_021846	1370141_at	Myeloid cell leukemia sequence 1	Rn.161889	60430	Mcl1
10.1	10.3899	10.363	10.143	10.4554	10.5424	9.9816	10.3215	10.4071	1097.5	1341.75	1316.96	1130.7	1404.07	1491.35	1011.02	1279.62	1357.84	0.170378	0.026082	0.062589	0.079784	0.058516	0.050509	0.089132	0.06274	0.051479	BG377835	1392399_at	WD repeats and SOF1 domain containing	Rn.41457	362902	Wdsof1
10.5009	11.0922	10.8207	11.0765	11.5341	11.269	10.7433	11.0166	10.8944	1449.06	2183.16	1808.65	2159.53	2965.58	2467.78	1714.18	2071.7	1903.45	0.338657	0.056558	0.070252	0.049796	0.046003	0.073545	0.069537	0.0848	0.051319	NM_031335	1369996_at	Polymerase (RNA) II (DNA directed) polypeptide F	Rn.28212	83503	Polr2f
8.55627	9.03822	8.79437	8.31989	8.78905	8.55683	8.60431	8.91313	8.87968	376.438	525.745	443.986	319.548	442.352	376.585	389.184	482.08	471.032	0.200495	0.053283	0.055732	0.059519	0.070143	0.072445	0.077244	0.056577	0.051778	BI287857	1367502_at	Mitochondrial ribosomal protein L21	Rn.22778	309140	Mrpl21
8.4698	8.66697	8.62718	8.39679	8.89589	8.82803	8.27966	8.53223	8.73699	354.539	406.46	395.403	337.043	476.354	454.466	310.761	370.218	426.674	0.060821	0.086454	0.051679	0.122219	0.075202	0.096722	0.057765	0.056322	0.082038	NM_053719	1368541_at	Embigin	Rn.16221	114511	Emb
9.93055	10.1255	9.86483	9.15508	9.81595	9.63304	9.68201	10.0988	9.91746	975.873	1117.07	932.416	570.103	901.354	794.025	821.439	1096.58	967.059	0.060847	0.060917	0.129144	0.13846	0.100796	0.084334	0.131665	0.079625	0.129392	AW254062	1383506_at	B-cell CLL/lymphoma 11A (zinc finger protein)	Rn.16729	305589	Bcl11a
7.01049	7.41373	7.14335	6.92293	7.24585	7.32372	6.76196	7.06194	7.20725	128.934	170.512	141.372	121.342	151.781	160.199	108.531	133.615	147.774	0.13655	0.097972	0.158047	0.106433	0.059984	0.125115	0.150954	0.10797	0.110151	BF413105	1378683_at	Transcribed locus	Rn.49534	-	-
8.78506	9.48689	9.10779	8.81951	9.22527	9.06833	9.10532	9.36942	9.091	441.13	717.527	551.719	451.79	598.526	536.833	550.775	661.419	545.335	0.269483	0.067193	0.096161	0.083962	0.083192	0.089436	0.120856	0.0648	0.072741	AI170798	1370223_at	ADP-ribosylation factor related protein 1	Rn.10973	117051	Arfrp1
6.37429	6.96062	6.54144	6.7641	6.92996	6.88569	6.2747	6.76179	6.7026	82.9569	124.553	93.1472	108.692	121.934	118.249	77.4235	108.518	104.156	0.162232	0.053759	0.059025	0.149633	0.074356	0.158337	0.111828	0.174618	0.095321	NM_017313	1387821_at	RAB3A interacting protein (rabin3)	Rn.31889	29885	Rab3ip
8.15225	8.61797	8.49842	7.58514	7.9827	7.89453	8.32844	8.70094	8.43523	284.493	392.887	361.642	192.024	252.949	237.953	321.448	416.144	346.144	0.155823	0.094476	0.083623	0.069281	0.052099	0.130262	0.082115	0.089046	0.098348	AI411530	1372170_at	Aminoacylase 1	Rn.3679	300981	Acy1
5.95097	6.37046	6.05592	5.65819	6.1236	6.00351	5.89596	6.32247	6.12179	61.8615	82.737	66.5294	50.4992	69.7248	64.1559	59.5471	80.0301	69.6374	0.177509	0.099058	0.071415	0.079783	0.07331	0.131319	0.09866	0.094339	0.090559	BI284353	1376553_at	Nth (endonuclease III)-like 1 (E.coli)	Rn.14632	29541	Nthl1
7.9985	8.56049	8.27115	7.8145	8.20746	8.01573	8.07764	8.51622	8.1819	255.734	377.541	308.933	225.112	295.591	258.806	270.154	366.132	290.4	0.165218	0.051132	0.058355	0.090023	0.059321	0.074462	0.131884	0.049682	0.165274	BE099971	1371008_at	Peptidase (mitochondrial processing) alpha	Rn.11175	296588	Pmpca
8.77515	9.30318	8.96579	8.62674	9.07604	8.94689	8.81545	9.19511	8.91665	438.11	631.737	500.002	395.282	539.71	493.494	450.521	586.143	483.258	0.156435	0.0314	0.075346	0.06667	0.032605	0.057258	0.090095	0.046191	0.072205	BI301226	1389988_at	Potassium channel tetramerisation domain containing 2	Rn.21595	498024	Kctd2
6.0266	7.02592	6.35816	6.2211	6.5176	6.20744	6.53475	6.84117	6.31201	65.191	130.32	82.0346	74.5998	91.6206	73.8968	92.7162	114.656	79.4519	0.393167	0.100807	0.105026	0.115311	0.103146	0.070948	0.147777	0.117456	0.050436	BE097272	1380159_at	Progressive external ophthalmoplegia 1 (human)	Rn.105678	309441	Peo1
6.21098	6.6412	6.74076	6.74091	6.96809	7.0508	6.41205	6.69379	6.61711	74.0783	99.8161	106.948	106.959	125.2	132.587	85.1568	103.522	98.1632	0.154538	0.086101	0.07625	0.069781	0.070894	0.04174	0.181151	0.066304	0.117203	AI170987	1376422_at	Transcribed locus	Rn.167144	-	-
3.73021	4.00867	4.14275	3.87679	3.9428	4.54739	3.76541	3.82566	4.19066	13.271	16.0964	17.6641	14.6903	15.378	23.383	13.5988	14.1788	18.2606	0.081717	0.080148	0.172357	0.074099	0.079955	0.265136	0.106738	0.127449	0.12577	AA956352	1380268_at	ESTs	-	-	-
8.58604	8.78198	8.69814	8.30794	8.759	8.70021	8.23853	8.60228	8.6942	384.287	440.189	415.337	316.912	433.233	415.934	302.026	388.637	414.205	0.114864	0.064696	0.098866	0.112769	0.093402	0.095781	0.146976	0.116746	0.136595	BI302258	1372932_at	Ribosomal RNA processing 1 homolog (S. cerevisiae)	Rn.104084	309674	Rrp1
8.97972	9.37537	9.15878	8.96863	9.50667	9.16269	8.93082	9.38367	9.13286	504.853	664.152	571.567	500.987	727.433	573.119	488.028	667.984	561.39	0.067379	0.049747	0.033838	0.078993	0.085982	0.042184	0.100699	0.070396	0.085967	AW523737	1373263_at	WD repeat domain 74	Rn.14606	690229	Wdr74
4.65758	5.03852	5.11128	5.47595	5.57499	5.77017	4.74633	4.89382	5.31554	25.239	32.8659	34.566	44.5067	47.6693	54.5751	26.8403	29.7294	39.8233	0.196522	0.034104	0.097271	0.130766	0.108376	0.125068	0.088853	0.155264	0.116446	BF544602	1392904_at	Transcribed locus	Rn.220218	-	-
7.55842	7.81717	7.76983	7.52926	7.88575	7.96295	7.41307	7.79686	7.7552	188.5	225.529	218.249	184.728	236.509	249.509	170.434	222.376	216.047	0.061157	0.06778	0.07233	0.127588	0.100104	0.063726	0.132433	0.094225	0.046377	BE097245	1374715_at	WD repeat domain 70	Rn.17260	294783	Wdr70
8.65943	8.94393	8.83691	8.13726	8.60986	8.64823	8.53936	8.86389	8.73184	404.341	492.483	457.272	281.552	390.684	401.215	372.052	465.904	425.153	0.125188	0.086042	0.092134	0.108189	0.085028	0.139921	0.103973	0.065377	0.134004	BE097621	1394409_at	Melanoma associated antigen (mutated) 1	Rn.92148	362838	Mum1
9.73478	10.0827	9.77028	9.50753	10.0907	9.88408	9.54578	9.86944	9.81909	852.042	1084.41	873.268	727.866	1090.44	944.941	747.422	935.4	903.318	0.083526	0.074289	0.116305	0.131812	0.060606	0.107906	0.168197	0.121419	0.097698	NM_022701	1368241_a_at	Flotillin 1	Rn.9567	64665	Flot1
6.56631	6.85914	6.94601	6.65333	6.99988	7.05723	6.60016	6.74295	7.0089	94.7668	116.093	123.298	100.659	127.989	133.18	97.0166	107.11	128.792	0.20209	0.066202	0.15379	0.0932	0.056136	0.060588	0.080807	0.164991	0.067899	BE118562	1377684_at	Arginyl-tRNA synthetase 2, mitochondrial	Rn.105643	297969	Rars2
10.1748	10.5761	10.5536	10.4051	10.715	10.7368	10.2257	10.4455	10.567	1155.9	1526.59	1502.97	1355.96	1680.88	1706.47	1197.41	1394.47	1516.99	0.185399	0.049519	0.071346	0.062852	0.059809	0.080033	0.109766	0.069829	0.067272	AW535890	1388622_at	Similar to Nol5a_predicted protein	Rn.121383	501161	RGD1563521
8.06794	8.45828	8.30388	7.83423	8.38721	8.14588	7.98957	8.28373	8.16162	268.344	351.719	316.022	228.212	334.813	283.24	254.156	311.639	286.347	0.136299	0.099263	0.047332	0.172116	0.051969	0.07597	0.144065	0.089187	0.11444	AI410976	1389695_at	Family with sequence similarity 20, member C	Rn.16181	304334	Fam20c
6.93531	7.09239	7.28687	7.03511	7.28377	7.26562	6.80041	7.29058	7.27764	122.387	136.465	156.159	131.153	155.824	153.876	111.462	156.561	155.163	0.116463	0.076756	0.165522	0.06478	0.100681	0.057165	0.115794	0.068148	0.059067	BI294760	1390579_at	Similar to RIKEN cDNA 1810029B16	Rn.27406	290686	RGD1305222
4.66484	4.86029	5.23273	4.73749	4.9585	5.30382	4.91248	4.79853	5.34356	25.3663	29.0465	37.6018	26.6764	31.0926	39.5011	30.1165	27.8292	40.6043	0.143817	0.029692	0.055103	0.083072	0.067943	0.113636	0.121996	0.048834	0.100938	BF400776	1378497_at	Transcribed locus, strongly similar to NP_080685.2 DEAD (Asp-Glu-Ala-Asp) box polypeptide 55 [Mus musculus]	Rn.210708	-	-
10.0039	10.4437	10.2024	9.61674	10.128	9.9601	10.0797	10.3517	10.2668	1026.77	1392.73	1178.23	785.104	1119	996.068	1082.16	1306.69	1232.01	0.166662	0.082286	0.086142	0.059861	0.11153	0.064878	0.079301	0.098162	0.060764	BI282366	1371885_at	Tubulin folding cofactor B	Rn.9550	292777	Tbcb
7.63215	7.77694	7.75535	7.28423	7.72072	7.69807	7.35089	7.68986	7.83502	198.384	219.327	216.069	155.873	210.945	207.659	163.244	206.48	228.337	0.032183	0.093845	0.049093	0.069034	0.054605	0.048558	0.117338	0.086873	0.081825	BM384966	1389587_at	Uridine monophosphate synthetase	Rn.102010	288051	Umps
5.99958	6.64386	6.28873	6.16623	6.54143	6.10878	6.20877	6.71797	6.31357	63.9814	100	78.1801	71.8158	93.1465	69.0122	73.965	105.271	79.5379	0.231586	0.068296	0.10443	0.085739	0.08929	0.103561	0.140931	0.16052	0.101842	U50449	1370463_x_at	RT1 class Ib, locus Aw2	Rn.116785	24737	RT1-Aw2
4.5416	5.02529	4.81245	4.38201	4.72155	4.616	4.49554	4.93529	4.68131	23.2894	32.5659	28.0991	20.8505	26.3832	24.5219	22.5576	30.5964	25.6575	0.080175	0.182394	0.139222	0.047448	0.127752	0.097995	0.091229	0.199208	0.108638	AW527140	1396394_at	Transcribed locus	Rn.46433	-	-
9.7747	10.2662	10.0621	10.2166	10.3953	10.5446	9.71975	10.0554	10.0563	875.947	1231.5	1069.04	1189.88	1346.78	1493.62	843.211	1064.09	1064.75	0.143145	0.068798	0.112413	0.133189	0.075076	0.094595	0.112734	0.096583	0.087975	AW536030	1384036_s_at	Similar to liver-specific bHLH-Zip transcription factor	Rn.165356	685277	LOC685277
11.1087	11.8568	11.611	11.5166	11.7945	11.4525	11.5517	11.8593	11.5987	2208.27	3708.96	3127.95	2929.83	3552.21	2802.5	3001.98	3715.4	3101.39	0.325043	0.052019	0.115937	0.074734	0.063404	0.122544	0.080308	0.044486	0.066524	AI409193	1371305_at	Transcribed locus, strongly similar to NP_001030088.2 ribosomal protein L8 [Rattus norvegicus]	Rn.9810	-	-
9.2899	9.7473	9.46968	8.7999	9.21394	9.12018	9.18898	9.53255	9.42585	625.948	859.468	709.019	445.691	593.844	556.478	583.658	740.6	687.802	0.100556	0.070275	0.145195	0.135559	0.073362	0.126862	0.132842	0.078838	0.166741	NM_012993	1387110_at	Nardilysin 1 (N-arginine dibasic convertase)	Rn.203027	25499	Nrd1
5.87538	6.14221	6.1059	5.91175	6.55372	6.49619	6.05108	5.99939	6.22993	58.7037	70.63	68.8746	60.2024	93.9434	90.271	66.3066	63.9729	75.0578	0.097001	0.041951	0.224178	0.070567	0.095035	0.089691	0.077429	0.119681	0.091026	AA849263	1382310_at	Transcribed locus, strongly similar to XP_001076141.1 PREDICTED: similar to component of oligomeric golgi complex 5 isoform 1	Rn.160612	-	-
9.35966	9.48777	9.74889	9.37077	9.76174	9.99788	9.40755	9.50766	9.67302	656.959	717.965	860.416	662.038	868.114	1022.5	679.133	727.932	816.336	0.152849	0.064775	0.107427	0.094703	0.122739	0.164312	0.113196	0.142609	0.086884	BI295105	1383632_at	Transcribed locus	Rn.164489	-	-
10.827	11.2821	11.2228	10.833	11.1703	11.0169	10.9831	11.25	11.2949	1816.57	2490.29	2390.01	1824.14	2304.6	2072.13	2024.15	2435.5	2512.49	0.245884	0.085828	0.078842	0.068854	0.060222	0.080899	0.087603	0.078061	0.113248	NM_017271	1368436_at	Nuclear distribution gene C homolog (Aspergillus)	Rn.10413	29648	Nudc
10.7525	11.1336	11.1671	10.5627	10.9204	10.9361	10.7631	11.08	10.8623	1725.14	2246.71	2299.49	1512.48	1938.06	1959.27	1737.86	2164.77	1861.56	0.155353	0.112171	0.106865	0.087637	0.063949	0.110541	0.180397	0.080056	0.082185	NM_017202	1367607_at	Cytochrome c oxidase subunit IV isoform 1	Rn.2528	29445	Cox4i1
11.1793	11.5848	11.6293	11.5845	11.7853	11.9579	11.3139	11.5102	11.6332	2319.02	3071.65	3167.88	3071.02	3529.63	3978.2	2545.79	2916.86	3176.45	0.27596	0.080034	0.072808	0.031769	0.037674	0.106121	0.066565	0.102508	0.056077	BI284172	1377593_at	Dolichyl-phosphate mannosyltransferase polypeptide 1, catalytic subunit	Rn.7840	296394	Dpm1
8.73441	9.11971	8.99279	8.32613	8.63635	8.66125	8.68642	9.04502	8.99987	425.912	556.296	509.448	320.933	397.924	404.852	411.977	528.229	511.954	0.104881	0.057472	0.082311	0.064489	0.052237	0.103977	0.096939	0.063817	0.077769	AI406390	1373768_at	BMS1 homolog, ribosome assembly protein (yeast)	Rn.41094	362426	Bms1
9.4349	9.68545	9.84877	9.52136	9.79724	9.91407	9.40534	9.65195	9.779	692.13	823.4	922.094	734.878	889.74	964.789	678.093	804.501	878.562	0.151364	0.057752	0.060894	0.061953	0.057471	0.098559	0.072256	0.037886	0.051374	BI295900	1388194_at	Dihydrolipoamide S-acetyltransferase	Rn.15413	81654	Dlat
6.45654	7.01109	6.7888	6.66755	6.90602	6.96024	6.61414	6.76554	6.97512	87.8238	128.988	110.569	101.656	119.928	124.521	97.9613	108.8	125.812	0.090981	0.041891	0.050044	0.048834	0.078497	0.056206	0.122607	0.053839	0.079391	BM384065	1372343_at	Exosome component 8	Rn.220644	295050	Exosc8
7.31704	7.85708	7.61847	7.29446	7.67452	7.54363	7.43311	7.66993	7.6605	159.459	231.855	196.512	156.983	204.296	186.577	172.818	203.647	202.321	0.235234	0.090005	0.109377	0.10451	0.069761	0.042658	0.131578	0.08722	0.082131	AI231606	1388756_at	Phosphopantothenoylcysteine synthetase	Rn.15017	298490	Ppcs
9.42203	10.0163	9.86035	9.44105	9.75038	9.67617	9.70104	9.98085	9.74234	685.983	1035.64	929.525	695.087	861.305	818.121	832.346	1010.5	856.518	0.264828	0.063827	0.087755	0.06581	0.081306	0.103108	0.100106	0.07763	0.063741	AI576586	1389446_at	Transcribed locus, strongly similar to NP_003081.2 small nuclear ribonucleoprotein polypeptide A' [Homo sapiens]	Rn.38265	-	-
10.7355	11.3808	11.1887	10.6371	10.9412	10.7283	11.0371	11.3158	11.1402	1704.93	2666.63	2334.18	1592.52	1966.21	1696.45	2101.35	2549.15	2257.01	0.130493	0.05608	0.123041	0.091462	0.11727	0.114969	0.132549	0.131781	0.108916	BF281741	1371471_at	Glioma tumor suppressor candidate region gene 2	Rn.8075	292624	Gltscr2
8.31283	8.26993	8.71903	8.30805	8.659	8.95153	8.34902	8.40177	8.78076	317.988	308.672	421.395	316.936	404.221	495.084	326.066	338.209	439.817	0.191682	0.128604	0.064528	0.142038	0.064881	0.09559	0.071534	0.10612	0.085222	NM_133600	1368045_at	Solute carrier family 31 (copper transporters), member 1	Rn.2789	171135	Slc31a1
8.19456	8.43755	8.34728	7.92249	8.46474	8.37041	8.14517	8.36567	8.45347	292.96	346.701	325.673	242.609	353.298	330.936	283.1	329.851	350.548	0.064437	0.069813	0.078333	0.124526	0.080429	0.006542	0.108916	0.119718	0.090441	BM388851	1371957_at	IMP4, U3 small nucleolar ribonucleoprotein, homolog (yeast)	Rn.6698	316317	Imp4
6.45249	6.84425	6.67768	6.4092	6.6918	6.75377	6.46934	6.81696	6.82439	87.5776	114.901	102.372	84.9888	103.379	107.916	88.6065	112.748	113.33	0.060896	0.154587	0.134302	0.072315	0.098939	0.084134	0.098148	0.122807	0.116408	BM390965	1397628_at	Similar to RIKEN cDNA 2900092E17	Rn.159917	293500	RGD1305592
6.50325	6.76383	6.76009	6.33037	6.71257	6.74469	6.39303	6.75991	6.65255	90.7138	108.672	108.39	80.4695	104.878	107.239	84.0415	108.377	100.604	0.179955	0.07604	0.070893	0.082024	0.067411	0.055054	0.161065	0.064743	0.075693	BI280308	1379317_a_at	Programmed cell death 11	Rn.136636	309458	Pdcd11
9.44776	9.86592	9.80418	9.56836	9.93688	9.77801	9.51691	9.80097	9.81846	698.328	933.121	894.03	759.213	980.164	877.959	732.614	892.043	902.924	0.205711	0.057696	0.060136	0.07357	0.089474	0.044049	0.098912	0.062745	0.040828	AI178191	1399026_at	Poly(A) binding protein interacting protein 2	Rn.1073	361309	Paip2
4.97938	5.32235	5.30831	3.66128	4.08239	4.04823	4.94207	5.30029	5.02609	31.5459	40.0117	39.6242	12.6519	16.9403	16.5439	30.7405	39.4045	32.584	0.071563	0.09148	0.151674	0.152197	0.138507	0.103388	0.116739	0.091263	0.069199	AB040807	1370392_at	Transient receptor potential cation channel, subfamily M, member 4	Rn.205004	171143	Trpm4
9.40353	9.83783	9.85676	9.63867	9.85027	9.95092	9.45282	9.71015	9.71284	677.243	915.128	927.215	797.129	923.053	989.75	700.781	837.619	839.182	0.242039	0.038463	0.11331	0.050357	0.041239	0.142882	0.068551	0.090513	0.066388	AI136693	1384465_at	Paraspeckle component 1	Rn.204537	305910	Pspc1
8.9519	9.40647	9.19149	8.85786	9.35029	9.11042	9.01268	9.3474	9.15143	495.211	678.625	584.675	463.961	652.706	552.726	516.52	651.4	568.663	0.213732	0.0655	0.105821	0.099048	0.088172	0.059074	0.132214	0.117339	0.059664	NM_053950	1386970_at	Eukaryotic translation initiation factor 2B, subunit 4 delta	Rn.11060	117019	Eif2b4
11.1541	11.4847	11.5053	11.1882	11.3981	11.6331	11.1727	11.3439	11.5878	2278.87	2865.76	2906.97	2333.37	2698.8	3176.23	2308.44	2599.29	3078.05	0.243751	0.033703	0.144978	0.077193	0.054856	0.108205	0.110882	0.078067	0.08421	BM392315	1373555_at	Transcribed locus	Rn.165969	-	-
10.9017	11.0779	11.0549	10.3335	10.61	10.7428	10.5903	10.9193	11.149	1913.1	2161.62	2127.44	1290.31	1562.89	1713.58	1541.69	1936.59	2270.82	0.086135	0.108186	0.171118	0.10873	0.052938	0.164487	0.099158	0.130259	0.136454	AW920562	1393412_at	Family with sequence similarity 3, member C	Rn.162738	312159	Fam3c
3.5628	3.90778	4.043	3.64316	3.81427	3.98351	3.60448	3.92841	3.8679	11.8171	15.0093	16.4841	12.494	14.0673	15.8182	12.1634	15.2254	14.6	0.045107	0.087494	0.122127	0.062675	0.109545	0.1789	0.107884	0.116537	0.132082	BE101697	1393752_at	Transcribed locus, strongly similar to NP_005924.2 myeloid/lymphoid or mixed-lineage leukemia protein [Homo sapiens]	Rn.218112	-	-
11.3071	11.7877	11.7027	11.2653	11.6604	11.5683	11.5182	11.6535	11.7187	2533.82	3535.5	3333.22	2461.46	3236.91	3036.72	2933.08	3221.46	3370.39	0.277482	0.028444	0.037033	0.041797	0.040297	0.072724	0.060797	0.078834	0.03576	AI411531	1371476_at	COP9 constitutive photomorphogenic homolog subunit 4 (Arabidopsis)	Rn.7506	360915	Cops4
11.5952	12.2892	12.0213	12.169	12.4276	12.1913	11.9876	12.4089	11.9796	3093.88	5005.16	4156.92	4605.05	5509.1	4676.78	4060.95	5438.15	4038.49	0.310297	0.073174	0.10577	0.06783	0.099686	0.097282	0.08578	0.067235	0.074303	AI071098	1383986_at	Transcribed locus	Rn.203889	-	-
8.31804	8.56365	8.42243	8.37701	8.76155	8.67477	8.1784	8.58417	8.64871	319.139	378.369	343.087	332.454	434	408.664	289.697	383.789	401.348	0.128669	0.085221	0.074591	0.18699	0.101751	0.090089	0.105298	0.114168	0.080247	AI029816	1382457_at	KH domain containing, RNA binding, signal transduction associated 3	Rn.54682	64015	Khdrbs3
11.8956	12.2178	12.1039	11.651	12.0879	11.9923	11.7733	12.0776	12.0848	3810.07	4763.48	4401.87	3215.88	4353.32	4074.2	3500.39	4322.35	4343.97	0.067729	0.031732	0.049797	0.02785	0.065478	0.08413	0.061809	0.066034	0.08043	BG670306	1383107_at	Small nuclear ribonucleoprotein D1	Rn.18606	291794	Snrpd1
6.80352	6.95709	7.35503	7.34067	7.49365	7.79707	7.02448	7.07688	7.51049	111.703	124.249	163.714	162.092	180.224	222.409	130.19	135.006	182.34	0.280215	0.187262	0.183032	0.107184	0.0464	0.219283	0.077727	0.067188	0.10692	BI298018	1389796_at	Transcribed locus	Rn.50018	-	-
9.63294	10.0866	9.98946	9.43548	9.84962	9.68969	9.72416	9.9399	9.94171	793.97	1087.35	1016.55	692.409	922.637	825.824	845.793	982.218	983.451	0.06937	0.12811	0.061411	0.06358	0.053441	0.079591	0.067792	0.139011	0.102982	AA799462	1398908_at	Stomatin (Epb7.2)-like 2	Rn.2208	298203	Stoml2
12.429	12.9468	12.9889	12.655	12.8507	12.844	12.7489	12.8606	13.044	5514.45	7895.42	8129.21	6449.63	7386.63	7352.4	6883.37	7437.49	8445.69	0.196841	0.032228	0.098843	0.082699	0.065178	0.075705	0.09055	0.132924	0.058675	BI289500	1372141_at	Prefoldin subunit 2	Rn.7627	685607	Pfdn2
10.8938	11.1231	11.21	10.9674	11.1612	11.4311	10.7902	11.0506	11.2315	1902.66	2230.42	2368.9	2002.24	2290.11	2761.24	1770.82	2121.1	2404.46	0.156248	0.089006	0.133004	0.14054	0.059706	0.138564	0.080057	0.057639	0.119658	AI058964	1370170_at	Heterogeneous nuclear ribonucleoprotein U	Rn.4328	117280	Hnrnpu
5.68038	5.9372	5.94257	5.38394	5.74223	5.95184	5.64962	5.86383	5.88476	51.282	61.2739	61.5024	41.7568	53.5283	61.8988	50.2002	58.2356	59.0866	0.147542	0.087104	0.066247	0.07681	0.057182	0.083402	0.089273	0.069496	0.114073	AI549079	1390147_at	Similar to mKIAA1429 protein	Rn.102580	313061	RGD1559904
7.01664	7.48453	7.15397	6.5535	7.09465	6.83947	6.99181	7.33396	7.09	129.485	179.089	142.416	93.9291	136.679	114.521	127.275	161.34	136.239	0.199607	0.073056	0.120499	0.098149	0.097967	0.103168	0.140138	0.122744	0.120046	BF557930	1399007_at	Component of oligomeric golgi complex 2	Rn.146004	690961	Cog2
10.8927	11.4492	11.3618	11.5802	11.7158	11.8697	11.067	11.3195	11.2408	1901.21	2796.1	2631.74	3061.88	3363.62	3742.28	2145.35	2555.7	2420.01	0.091628	0.062519	0.070962	0.079667	0.116549	0.08106	0.076175	0.089609	0.041381	AI576190	1395634_at	Transcribed locus	Rn.168253	-	-
4.65611	4.88478	4.92736	3.97499	4.28259	4.3862	4.43382	4.78301	4.78371	25.2132	29.5437	30.4287	15.725	19.462	20.9111	21.6129	27.5315	27.5448	0.113431	0.088425	0.202968	0.131195	0.09297	0.067752	0.087464	0.112802	0.120799	BE106259	1380781_at	Transcribed locus	Rn.205519	-	-
8.75958	8.88897	9.13055	9.07231	9.01464	9.66709	8.61922	8.82751	9.18454	433.407	474.075	560.492	538.316	517.222	812.988	393.227	454.303	581.865	0.204565	0.066807	0.140731	0.164312	0.139522	0.162093	0.14632	0.14804	0.162182	BE113571	1384301_at	Transcribed locus	Rn.3665	-	-
7.16204	7.48182	7.58795	7.43642	7.75755	7.85253	7.23732	7.33351	7.55716	143.215	178.753	192.398	173.215	216.399	231.125	150.887	161.29	188.335	0.126068	0.088446	0.058466	0.06107	0.094473	0.092873	0.100021	0.100543	0.034953	AA817668	1382161_at	M-phase phosphoprotein 10 (U3 small nucleolar ribonucleoprotein)	Rn.103228	293828	Mphosph10
7.18039	7.58187	7.49126	6.60355	6.9601	7.02953	7.24419	7.48162	7.41773	145.048	191.589	179.926	97.2449	124.508	130.647	151.607	178.728	170.985	0.084929	0.102551	0.069331	0.111635	0.143977	0.139615	0.115727	0.097036	0.071811	AW530736	1384807_at	Transcribed locus	Rn.2209	-	-
4.12955	4.56575	4.12655	4.51394	5.23084	4.55389	4.08019	4.59451	4.13538	17.5032	23.6825	17.4669	22.8471	37.5526	23.4886	16.9145	24.1594	17.5741	0.154976	0.180462	0.209139	0.127733	0.09047	0.210781	0.155539	0.213232	0.111918	AA946433	1379654_at	GIY-YIG domain containing 2	Rn.30339	293489	Giyd2
7.70069	7.91323	8.1673	7.82693	7.98266	8.31429	7.63416	7.62693	8.15265	208.036	241.057	287.476	227.06	252.942	318.31	198.66	197.667	284.572	0.092263	0.063371	0.068984	0.056088	0.058975	0.162563	0.079758	0.07225	0.073602	BE103561	1380997_at	Cyclin J	Rn.50277	294053	Ccnj
11.3555	11.6985	11.7312	10.915	11.129	11.247	11.3975	11.6985	11.7392	2620.27	3323.53	3399.72	1930.82	2239.56	2430.44	2697.67	3323.53	3418.62	0.175891	0.050245	0.084447	0.056112	0.046909	0.068508	0.060336	0.029718	0.047922	AI639205	1386296_at	Transcribed locus	Rn.218084	-	-
5.78538	6.2526	6.24817	6.03072	6.1263	6.371	5.90359	6.10306	6.21389	55.1535	76.2465	76.0128	65.3774	69.8554	82.7679	59.8629	68.7391	74.2279	0.124763	0.073178	0.149584	0.073462	0.078212	0.109004	0.04673	0.142355	0.092508	AA996843	1381077_at	Transcribed locus	Rn.12430	-	-
11.8551	12.1884	12.2608	12.1727	12.4195	12.4911	11.9108	12.1185	12.3006	3704.59	4667.39	4907.59	4616.87	5478.25	5756.99	3850.42	4446.64	5044.87	0.242006	0.060254	0.032878	0.044529	0.03679	0.078273	0.03411	0.066213	0.062687	AA957342	1372827_at	Peptidylprolyl isomerase D (cyclophilin D)	Rn.136915	361967	Ppid
8.74262	9.14719	9.10639	9.40047	9.65843	9.67621	8.78167	9.05222	9.11462	428.342	566.994	551.184	675.808	808.122	818.143	440.095	530.872	554.337	0.16652	0.053424	0.052779	0.068217	0.142793	0.092532	0.11804	0.124984	0.094575	BF545309	1383348_at	Transcribed locus	Rn.18381	-	-
6.15832	6.35839	5.92146	4.36174	5.09925	4.81498	5.84697	6.16152	6.11571	71.4232	82.0476	60.609	20.5596	34.2789	28.1484	57.559	71.5818	69.3445	0.104252	0.088055	0.084302	0.196944	0.081552	0.142871	0.108763	0.172973	0.072403	AW532202	1382588_at	Similar to Protein C18orf1	Rn.206948	679578	LOC679578
9.8403	10.3463	10.2384	9.77388	10.072	9.92732	9.92578	10.2508	10.1265	916.696	1301.81	1208	875.449	1076.4	973.691	972.652	1218.42	1117.84	0.10174	0.077386	0.0487	0.056483	0.084906	0.035577	0.132273	0.0468	0.045378	BM389329	1372940_at	RGD1562339	Rn.95097	498107	RGD1562339
6.23778	6.59699	6.25968	6.15386	6.68189	6.52342	6.15992	6.55149	6.34497	75.4673	96.8037	76.6216	71.2027	102.671	91.9909	71.5024	93.7983	81.288	0.169133	0.050988	0.098112	0.099403	0.078166	0.042268	0.100164	0.098802	0.074539	BM387357	1376431_at	SIL1 homolog, endoplasmic reticulum chaperone (S. cerevisiae)	Rn.103851	291673	Sil1
6.06511	6.24703	6.58405	6.32558	6.57795	6.76748	6.10276	6.21783	6.45856	66.9545	75.9527	95.9393	80.2028	95.5345	108.947	68.7249	74.4309	87.9468	0.080094	0.110212	0.111547	0.098108	0.104804	0.119714	0.086566	0.2048	0.095785	BE105494	1377970_at	Poly (ADP-ribose) polymerase family, member 8	Rn.59516	294762	Parp8
9.46354	9.60448	9.53792	9.40133	9.84847	10.0049	9.25776	9.55492	9.53551	706.008	778.46	743.361	676.211	921.902	1027.48	612.158	752.173	742.121	0.073777	0.038643	0.124616	0.15197	0.074095	0.111191	0.101984	0.05182	0.069785	AA850070	1398959_at	CCAAT/enhancer binding protein (C/EBP), delta	Rn.6975	25695	Cebpd
9.00228	9.39769	9.25771	9.16721	9.48359	9.46624	8.96668	9.27266	9.29838	512.81	674.507	612.137	574.917	715.888	707.33	500.311	618.513	629.639	0.133855	0.057017	0.115909	0.078428	0.085083	0.169393	0.113004	0.073934	0.122814	BE099244	1377463_at	Mannosidase 2, alpha 2	Rn.41796	308757	Man2a2
8.92153	9.41243	9.1324	8.77494	9.09286	9.06783	8.92779	9.22776	9.2072	484.895	681.434	561.211	438.046	546.039	536.647	487.004	599.56	591.076	0.093495	0.057783	0.096559	0.063068	0.067688	0.110191	0.09145	0.088112	0.061808	BG671338	1378194_a_at	RUN and FYVE domain containing 3	Rn.203111	360921	Rufy3
6.43174	7.04261	6.60242	6.2123	6.68421	6.1787	6.52335	6.99594	6.62566	86.327	131.837	97.1687	74.1462	102.837	72.4393	91.9865	127.64	98.7467	0.080184	0.059221	0.05471	0.104088	0.058913	0.086188	0.140121	0.07942	0.084773	AI070138	1376192_at	N-acetyltransferase 9 (GCN5-related, putative)	Rn.19920	303669	Nat9
6.37195	6.97645	6.55173	6.02315	6.26996	6.11967	6.36933	6.85341	6.59574	82.8225	125.928	93.8139	65.0353	77.1696	69.5351	82.6722	115.633	96.7198	0.137593	0.059718	0.139312	0.101824	0.098294	0.174168	0.166873	0.149303	0.112941	BI277872	1396280_at	G patch domain and KOW motifs	Rn.147981	679890	Gpkow
11.5212	11.788	11.7991	11.8352	12.1155	12.2658	11.4222	11.6142	11.8608	2939.18	3536.24	3563.55	3653.85	4437.4	4924.63	2744.26	3134.89	3719.26	0.210379	0.091413	0.092475	0.081948	0.037633	0.092497	0.100807	0.093318	0.082551	AI716196	1378857_at	Transcribed locus, strongly similar to NP_808587.1 transcription elongation factor A (SII)-like 5 [Mus musculus]	Rn.168575	-	-
3.30321	3.43783	3.75823	3.11459	3.273	3.61679	3.30173	3.43565	3.76141	9.87109	10.8365	13.5313	8.66134	9.66654	12.2677	9.86097	10.8202	13.5612	0.142783	0.074259	0.15945	0.057455	0.042007	0.209943	0.065327	0.064385	0.21649	AA998248	1392519_at	Transcribed locus, moderately similar to XP_002235433.1 hypothetical protein BRAFLDRAFT_234322 [Branchiostoma floridae]	Rn.216526	-	-
12.1809	12.6318	12.6763	12.7132	12.9592	12.9253	12.4291	12.6253	12.6958	4643.19	6346.74	6545.56	6715.13	7963.57	7778.63	5514.83	6318.21	6634.63	0.178971	0.029961	0.058639	0.096978	0.062924	0.050463	0.043597	0.036748	0.061054	AI231784	1388390_at	Eukaryotic translation initiation factor 3, subunit H	Rn.129213	299899	Eif3h
7.93888	8.05661	8.36753	7.83533	8.20311	8.35581	7.97038	8.04948	8.29911	245.381	266.245	330.276	228.386	294.701	327.604	250.798	264.932	314.979	0.19849	0.067255	0.08662	0.104261	0.040654	0.111993	0.084982	0.082075	0.040979	BI276838	1378378_at	Pantothenate kinase 2 (Hallervorden-Spatz syndrome)	Rn.91999	296167	Pank2
9.03752	9.43686	9.33748	9.17134	9.44768	9.54532	9.00613	9.25479	9.29629	525.49	693.071	646.936	576.565	698.289	747.184	514.18	610.899	628.727	0.165361	0.043677	0.038238	0.046558	0.065784	0.062194	0.112677	0.058256	0.026711	BM392399	1373647_at	Transcribed locus, strongly similar to NP_001009652.1 zinc finger protein 622 [Rattus norvegicus]	Rn.156584	-	-
7.06691	7.50389	7.51722	7.16623	7.19435	7.40946	7.16184	7.50916	7.50745	134.076	181.508	183.193	143.632	146.459	170.008	143.195	182.172	181.957	0.190376	0.137378	0.066121	0.069147	0.085181	0.098684	0.10297	0.109521	0.053538	BG379351	1391126_at	Transcribed locus	Rn.199944	-	-
6.93765	7.17921	6.89731	6.30541	6.95785	6.75741	6.84441	7.22074	6.94666	122.586	144.93	119.206	79.0893	124.314	108.189	114.914	149.162	123.354	0.057954	0.043888	0.175764	0.201044	0.030418	0.081707	0.081983	0.064676	0.1084	BE103919	1379278_at	Integrator complex subunit 9	Rn.16509	290322	Ints9
9.75733	10.3977	10.2713	11.0503	11.1846	11.1847	10.0962	10.383	10.1854	865.464	1349.02	1235.86	2120.66	2327.56	2327.72	1094.61	1335.35	1164.42	0.110531	0.096187	0.094719	0.125276	0.130607	0.086671	0.085386	0.064783	0.058418	BF409952	1395468_at	Transcribed locus	Rn.41186	-	-
6.48393	7.13921	6.91322	6.78141	7.08498	6.758	6.84268	7.25353	6.83516	89.5071	140.967	120.528	110.004	135.766	108.233	114.776	152.591	114.18	0.284609	0.100355	0.095862	0.106231	0.093212	0.095151	0.141647	0.076041	0.042916	BF403568	1381982_at	UDP-N-acteylglucosamine pyrophosphorylase 1-like 1	Rn.23051	296560	Uap1l1
7.72799	8.2644	7.91216	8.61891	8.922	8.89656	7.81987	8.11186	8.09104	212.01	307.491	240.878	393.143	485.053	476.575	225.952	276.639	272.675	0.066399	0.148987	0.063072	0.078569	0.150995	0.094692	0.109064	0.088867	0.047085	AW532161	1389117_at	Transcribed locus, strongly similar to NP_060277.1 O-sialoglycoprotein endopeptidase [Homo sapiens]	Rn.27608	-	-
7.73109	8.07775	7.96789	7.50893	7.95341	7.80613	7.61961	7.91491	7.87894	212.466	270.175	250.365	182.143	247.865	223.81	196.667	241.338	235.395	0.044928	0.051209	0.071389	0.046987	0.027196	0.067181	0.085602	0.087504	0.048574	BI285715	1375858_at	Tumor suppressor candidate 4	Rn.3371	363138	Tusc4
6.57025	6.88375	6.69328	6.01785	6.39122	6.5385	6.48211	6.74819	6.73854	95.026	118.091	103.485	64.7968	83.9361	92.9575	89.3942	107.5	106.783	0.054776	0.102441	0.087897	0.079838	0.05157	0.054155	0.083008	0.064541	0.079148	NM_030855	1368204_at	Ligase I, DNA, ATP-dependent	Rn.20467	81513	Lig1
6.89797	7.11757	7.20967	7.15954	7.35514	7.52528	6.93747	7.28453	7.36527	119.26	138.868	148.022	142.967	163.726	184.219	122.571	155.906	164.88	0.04707	0.075299	0.067225	0.066405	0.054665	0.085169	0.068516	0.117574	0.043742	AW529951	1384875_at	Transcribed locus	Rn.127009	-	-
4.36865	4.63201	4.37214	4.29325	4.77264	4.67456	4.0866	4.62122	4.23424	20.6583	24.7956	20.7083	19.6064	27.3343	25.5378	16.9898	24.6108	18.8206	0.052226	0.128671	0.129411	0.112081	0.09839	0.091719	0.202108	0.118333	0.201161	BE097616	1378149_at	Vacuolar protein sorting 26 homolog B (S. pombe)	Rn.61419	300472	Vps26b
7.14404	7.67938	7.56595	7.05087	7.23591	7.29245	7.35102	7.68746	7.4679	141.439	204.986	189.486	132.594	150.739	156.764	163.259	206.137	177.036	0.230115	0.059414	0.04774	0.059284	0.068785	0.065044	0.108857	0.095234	0.071641	BI296223	1374120_at	Solute carrier family 45, member 4	Rn.33421	315054	Slc45a4
6.05941	6.346	6.63664	6.2617	6.38647	6.63143	6.07979	6.07606	6.52651	66.6905	81.346	99.5011	76.729	83.6602	99.1424	67.6393	67.4647	92.1882	0.082957	0.097025	0.131426	0.058843	0.048029	0.164732	0.094743	0.252434	0.218802	BE095550	1398233_at	Transcribed locus	Rn.160315	-	-
8.36355	8.54929	8.5321	8.26386	8.63485	8.64499	8.13867	8.49739	8.52916	329.366	374.622	370.184	307.376	397.511	400.314	281.828	361.384	369.431	0.151011	0.065598	0.046745	0.115899	0.043972	0.057542	0.120446	0.097596	0.043265	BI283804	1390289_at	FIG4 homolog (S. cerevisiae)	Rn.11982	309855	Fig4
7.42989	7.88491	7.64252	7.37445	7.75419	7.51904	7.37656	7.76003	7.64507	172.433	236.371	199.815	165.932	215.896	183.424	166.175	216.771	200.168	0.058893	0.031792	0.079758	0.044744	0.063724	0.038472	0.067404	0.075456	0.076127	BG377107	1378392_at	DnaJ (Hsp40) homolog, subfamily A, member 3	Rn.198254	360481	Dnaja3
5.10538	5.24631	5.77261	5.36336	5.441	5.80937	5.12128	4.9752	5.63985	34.4249	37.9574	54.6674	41.1654	43.4414	56.0783	34.8064	31.4546	49.8613	0.275636	0.134379	0.234068	0.143372	0.124667	0.195468	0.126659	0.139018	0.197405	BE106331	1380937_at	CDNA clone IMAGE:7461178	Rn.11637	-	-
8.77544	9.27901	9.01076	9.18014	9.55485	9.44325	8.82873	9.17603	8.94002	438.198	621.241	515.833	580.093	752.136	696.148	454.687	578.443	491.15	0.055508	0.047536	0.06829	0.043667	0.070701	0.067804	0.109345	0.0954	0.064755	BI285669	1371633_at	Catenin, beta like 1	Rn.98091	296320	Ctnnbl1
6.1558	6.44363	6.17639	5.87109	6.42852	6.16283	5.93681	6.41078	6.10412	71.2985	87.0414	72.3234	58.5294	86.1345	71.6468	61.2573	85.0819	68.7897	0.230951	0.120564	0.066402	0.10053	0.106008	0.091022	0.103033	0.109935	0.169532	BI283139	1392828_at	Similar to Mediator of RNA polymerase II transcription subunit 12 (Thyroid hormone receptor-associated protein complex 230 kD	Rn.160193	679693	LOC679693
4.09238	4.42944	4.67341	4.17083	4.28874	4.38513	4.20574	4.36121	4.61075	17.058	21.5474	25.5174	18.0113	19.5452	20.8956	18.4524	20.552	24.4328	0.185376	0.044318	0.095539	0.076185	0.081754	0.079944	0.163483	0.107042	0.144434	AI071713	1382424_at	Transcribed locus	Rn.204312	-	-
7.42987	7.67931	7.50728	8.55381	8.91736	8.91811	7.16027	7.65575	7.4401	172.43	204.976	181.935	375.797	483.496	483.747	143.04	201.656	173.657	0.069557	0.059252	0.069414	0.03827	0.06061	0.082959	0.087117	0.092304	0.050034	AI412410	1368845_at	CaM kinase-like vesicle-associated	Rn.9958	79011	Camkv
9.51647	9.60737	9.91084	9.23435	9.46125	9.70741	9.44164	9.54143	9.95961	732.391	780.021	962.632	602.305	704.888	836.029	695.371	745.172	995.729	0.188837	0.118663	0.130691	0.135843	0.116228	0.201812	0.123052	0.12854	0.148162	AI011183	1374609_at	Transcribed locus	Rn.165696	-	-
9.32836	9.78156	9.73588	9.29757	9.61136	9.50822	9.50133	9.66098	9.79704	642.86	880.122	852.691	629.285	782.182	728.215	724.745	809.552	889.617	0.141375	0.080754	0.078975	0.096262	0.076466	0.045204	0.078772	0.082005	0.04099	AA892843	1371888_at	Mitochondrial ribosomal protein L24	Rn.162593	295224	mrpl24
13.735	14.2262	14.2614	14.2751	14.4168	14.4485	13.9928	14.2141	14.2528	13634.7	19165.2	19638.5	19825.9	21872	22357.9	16302.4	19005.1	19521.8	0.243304	0.030978	0.036864	0.040517	0.018948	0.02445	0.050786	0.037915	0.047254	AA892367	1371300_at	Ribosomal protein L3	Rn.107726	300079	Rpl3
9.76268	10.0885	10.2054	9.69979	9.99333	9.96187	9.8652	10.1068	10.1523	868.679	1088.78	1180.68	831.625	1019.28	997.291	932.655	1102.68	1138.01	0.19873	0.071178	0.02269	0.049545	0.034115	0.042068	0.061216	0.027835	0.031402	BG380294	1372712_at	Tetratricopeptide repeat domain 1	Rn.81253	287208	Ttc1
9.28379	9.64263	9.44288	8.96159	9.46345	9.32581	9.31378	9.55823	9.51918	623.303	799.32	695.969	498.548	705.964	641.724	636.396	753.9	733.768	0.154041	0.054453	0.071289	0.114706	0.057981	0.112183	0.097812	0.02766	0.088657	BF409138	1383652_at	Jagunal homolog 1 (Drosophila)	Rn.203687	502872	Jagn1
11.8623	12.1699	12.342	12.018	12.2514	12.2973	11.954	12.106	12.3399	3723.13	4607.92	5191.73	4147.42	4875.72	5033.34	3967.46	4408.28	5184.18	0.210956	0.129793	0.085663	0.075691	0.073352	0.103047	0.075185	0.118908	0.096551	BI296109	1373362_at	Ubiquinol cytochrome c reductase core protein 2	Rn.2334	293448	Uqcrc2
10.3769	10.9118	10.5693	10.222	10.7013	10.4487	10.5808	10.8764	10.656	1329.71	1926.54	1519.41	1194.34	1664.99	1397.57	1531.57	1879.85	1613.52	0.14065	0.048138	0.07647	0.024686	0.036787	0.051049	0.052718	0.098834	0.052371	BI280327	1398910_at	STIP1 homology and U-Box containing protein 1	Rn.6504	287155	Stub1
9.84383	10.2354	10.035	9.68972	10.1042	9.98425	9.77597	10.0881	10.0172	918.942	1205.49	1049.15	825.841	1100.7	1012.88	876.719	1088.48	1036.28	0.186868	0.077333	0.048248	0.051564	0.057626	0.035487	0.074154	0.077704	0.055147	AI145019	1379420_at	Similar to Dehydrogenase/reductase SDR family member 7 precursor (Retinal short-chain dehydrogenase/reductase 4)	Rn.27771	299135	RGD1565002
11.6137	12.0781	12.0615	12.5014	12.8438	12.8594	11.9287	12.0773	11.9776	3133.81	4323.85	4274.38	5798.24	7351.38	7431.31	3898.49	4321.45	4032.89	0.17664	0.100766	0.060403	0.073263	0.089732	0.074863	0.080714	0.058421	0.048067	AI230787	1371607_at	Microtubule-associated protein 4	Rn.203122	367171	Map4
6.58005	6.97799	6.82125	6.38107	6.84404	6.65116	6.69087	6.98203	6.85517	95.6737	126.062	113.084	83.3477	114.884	100.508	103.312	126.416	115.774	0.164069	0.068401	0.114048	0.058299	0.047424	0.053362	0.106229	0.052206	0.109393	BE098273	1373745_at	General transcription factor II H, polypeptide 4	Rn.34122	294236	Gtf2h4
5.7601	5.87999	5.87114	5.74863	5.99179	6.0432	5.44761	5.90366	6.01275	54.1955	58.8916	58.5314	53.7663	63.6368	65.9454	43.6409	59.8658	64.5681	0.101363	0.058577	0.02758	0.06342	0.063714	0.076693	0.147207	0.066184	0.114832	AI105153	1373526_at	ATG5 autophagy related 5 homolog (S. cerevisiae)	Rn.98385	365601	Atg5
5.64691	5.65156	6.02535	5.61506	5.94751	6.0492	5.5188	5.5748	6.07947	50.1059	50.2677	65.1345	49.0119	61.7133	66.2202	45.8484	47.6631	67.6243	0.129775	0.160119	0.130458	0.067059	0.05674	0.112537	0.062632	0.216294	0.038987	BE115981	1395947_at	Replication protein A1	Rn.14841	287524	Rpa1
12.3478	12.6719	12.7629	12.4334	12.6568	12.7368	12.4263	12.6959	12.7301	5212.65	6525.62	6950.49	5531.29	6457.68	6825.88	5504.13	6635.09	6794.26	0.184917	0.077218	0.08282	0.077651	0.055855	0.093561	0.060589	0.117949	0.089777	AW144821	1372334_at	ESTs	-	-	-
9.88816	10.1768	10.11	9.69978	10.0947	10.1251	9.78731	10.0333	10.0435	947.617	1157.5	1105.13	831.62	1093.47	1116.76	883.637	1047.91	1055.35	0.075176	0.042868	0.081498	0.180007	0.051152	0.078249	0.118608	0.089606	0.09348	AI060225	1372055_at	Phosphatidylinositol-3,4,5-trisphosphate-dependent Rac exchange factor 1	Rn.14163	311647	Prex1
5.93238	6.20865	6.04537	5.47226	5.82904	5.95264	5.98268	6.3569	6.19659	61.0695	73.9588	66.0447	44.393	56.8481	61.9332	63.2363	81.9629	73.3431	0.115575	0.131193	0.047116	0.138964	0.064764	0.065946	0.069917	0.174771	0.064777	BE101556	1381091_at	Transcribed locus	Rn.170782	-	-
4.67386	5.28877	4.99952	4.74008	5.24661	5.09767	5.04713	5.19049	4.78333	25.5254	39.0911	31.9894	26.7243	37.9653	34.2414	33.0626	36.5168	27.5376	0.139847	0.171383	0.069507	0.100879	0.084704	0.112127	0.141997	0.135979	0.126924	AI071216	1383973_at	Similar to expressed sequence AW413431	Rn.20470	307816	RGD1559841
5.07596	5.34356	5.3375	5.0481	5.27911	5.48453	5.03756	5.40471	5.3062	33.73	40.6043	40.4341	33.0849	38.8303	44.7722	32.844	42.3623	39.5663	0.13441	0.084293	0.076382	0.091749	0.058408	0.09475	0.101811	0.082935	0.046343	BI296464	1389232_at	WD repeat domain 5B	Rn.162060	303907	Wdr5b
7.49158	7.8698	8.034	7.96739	8.11905	8.29072	7.68036	7.69056	8.05625	179.966	233.908	262.105	250.278	278.021	313.152	205.125	206.58	266.178	0.209339	0.064548	0.124235	0.084377	0.107435	0.13319	0.053274	0.074852	0.125629	AW531852	1373552_at	LAS1-like (S. cerevisiae)	Rn.98429	296865	Las1l
11.5869	12.007	11.8459	11.518	11.8165	11.7177	11.5368	11.811	11.9144	3076.13	4115.92	3681.05	2932.67	3606.79	3368.06	2971.14	3593.07	3860.04	0.163818	0.058062	0.06765	0.056198	0.078748	0.056805	0.098071	0.083969	0.066831	BM385547	1388369_at	Transmembrane emp24 protein transport domain containing 9	Rn.9386	361207	Tmed9
5.90372	6.30109	6.39767	6.04754	6.30434	6.22724	6.13291	6.36449	6.38738	59.8683	78.8528	84.3122	66.1441	79.0306	74.918	70.1762	82.3953	83.713	0.159266	0.051695	0.116074	0.06604	0.074651	0.055913	0.074038	0.084048	0.091024	AI713147	1374629_at	Mediator complex subunit 8	Rn.102063	362575	Med8
6.84742	7.17918	7.05451	6.73468	6.94017	7.04249	6.72844	7.02072	7.2041	115.154	144.927	132.929	106.498	122.8	131.826	106.038	129.852	147.452	0.054567	0.147703	0.097713	0.073806	0.077063	0.064326	0.104326	0.101119	0.075411	AI500867	1379210_at	Transcribed locus	Rn.34519	-	-
3.92688	4.15109	4.05627	3.78663	3.98382	4.21404	3.62266	3.97196	4.0995	15.2093	17.7665	16.6364	13.8003	15.8216	18.5589	12.3177	15.692	17.1424	0.073516	0.110352	0.124757	0.082571	0.079568	0.118271	0.047244	0.123375	0.085765	BF564059	1396090_at	ring finger protein 150	-	-	-
7.37692	7.64937	7.85729	7.72866	7.8719	8.01492	7.35304	7.5864	7.74624	166.217	200.766	231.889	212.109	234.249	258.661	163.488	192.191	214.709	0.143416	0.126827	0.069485	0.100233	0.068795	0.113998	0.105953	0.055177	0.09805	AI713166	1383660_at	Transcribed locus	Rn.14604	-	-
10.0179	10.2116	10.2819	9.95943	10.104	10.4521	9.85629	10.0491	10.3533	1036.78	1185.76	1244.97	995.605	1100.54	1400.86	926.913	1059.45	1308.14	0.133815	0.039117	0.127015	0.082855	0.10039	0.140733	0.09332	0.091949	0.076329	NM_021754	1368173_at	Nucleolar protein 5	Rn.43930	60373	Nol5
7.42812	7.83354	7.68335	7.30482	7.67536	7.63268	7.54922	7.84634	7.70796	172.221	228.103	205.551	158.114	204.415	198.457	187.302	230.136	209.087	0.200563	0.07107	0.038817	0.069367	0.077616	0.031896	0.10599	0.067293	0.059649	AI228455	1399042_at	ATG4 autophagy related 4 homolog B (S. cerevisiae)	Rn.163086	316640	Atg4b
5.81581	6.46906	6.14985	5.98881	6.15983	6.21188	6.04356	6.26457	6.20572	56.3292	88.5893	71.0051	63.5055	71.498	74.1246	65.9619	76.8818	73.8088	0.208896	0.102002	0.111814	0.061772	0.051607	0.054294	0.029678	0.074639	0.087424	NM_133387	1387357_at	Trimethyllysine hydroxylase, epsilon	Rn.3607	170898	Tmlhe
10.2168	10.8054	10.4991	10.5007	10.8921	10.6503	10.393	10.6592	10.4866	1190.04	1789.57	1447.25	1448.86	1900.42	1607.16	1344.64	1617.11	1434.77	0.274555	0.045586	0.056986	0.072015	0.032694	0.041371	0.102645	0.068379	0.077376	AW434104	1373042_at	Chromatin modifying protein 2A	Rn.203178	365191	Chmp2a
8.7332	9.24347	8.95668	8.67211	9.03303	8.68409	8.79627	9.22425	9.02968	425.554	606.124	496.855	407.911	523.857	411.312	444.571	598.103	522.642	0.097161	0.099021	0.109419	0.114063	0.067111	0.142307	0.133005	0.09217	0.045907	AI008393	1389260_at	UBX domain protein 6	Rn.7230	363332	Ubxn6
4.90569	5.16933	5.19675	4.92358	5.50922	5.28873	5.1704	5.31489	5.29069	29.975	35.9852	36.6756	30.3491	45.545	39.0901	36.0119	39.8053	39.1432	0.127027	0.051427	0.093848	0.097333	0.109749	0.076594	0.073154	0.072495	0.095859	NM_019229	1368125_at	Solute carrier family 12 (potassium/chloride transporters), member 4	Rn.32091	29501	Slc12a4
7.4917	7.91774	7.69955	7.18751	7.57558	7.40351	7.40757	7.6531	7.72952	179.981	241.812	207.872	145.766	190.755	169.308	169.786	201.286	212.235	0.136162	0.061006	0.055196	0.080425	0.061673	0.208915	0.110875	0.10137	0.091662	AI548730	1375022_at	AFG3(ATPase family gene 3)-like 2 (yeast)	Rn.8386	307350	Afg3l2
8.5993	8.86257	9.04858	8.38666	8.49028	8.83849	8.64856	8.70572	9.0853	387.835	465.478	529.534	334.685	359.608	457.773	401.306	417.525	543.185	0.093843	0.079413	0.127533	0.070471	0.068332	0.085858	0.083101	0.084151	0.106702	BI295883	1389716_at	Similar to Centrosomal protein of 27 kDa (Cep27 protein)	Rn.162678	691918	LOC691918
7.24785	7.41982	7.39055	6.89817	7.31977	7.33151	7.14278	7.48435	7.42043	151.992	171.233	167.794	119.277	159.761	161.066	141.316	179.066	171.306	0.037338	0.080302	0.048635	0.109292	0.081961	0.038676	0.101562	0.038358	0.09248	AI599413	1389661_at	Pentatricopeptide repeat domain 1	Rn.105071	304278	Ptcd1
6.11499	6.56208	6.37898	6.2496	6.7078	6.5505	6.26997	6.52844	6.31511	69.3099	94.4894	83.227	76.0882	104.532	93.734	77.1701	92.3116	79.6228	0.16679	0.024241	0.077117	0.083358	0.09953	0.069533	0.089422	0.127786	0.077543	NM_134407	1367843_at	Aldo-keto reductase family 7, member A2 (aflatoxin aldehyde reductase)	Rn.8548	171445	Akr7a2
7.34437	7.70799	7.40802	6.98591	7.32402	7.19619	7.16106	7.6482	7.47214	162.508	209.091	169.839	126.756	160.232	146.646	143.118	200.603	177.557	0.110368	0.100496	0.072088	0.080708	0.107754	0.060152	0.105127	0.054066	0.060519	BM383698	1389237_at	Zinc finger, C3HC-type containing 1	Rn.56620	296957	Zc3hc1
9.67281	10.0839	9.85972	9.61671	9.9413	9.96646	9.72712	10.0697	9.90327	816.218	1085.32	929.119	785.088	983.172	1000.47	847.53	1074.69	957.594	0.245546	0.052612	0.068886	0.060876	0.035644	0.038018	0.139296	0.044318	0.077053	AI232979	1399020_at	Family with sequence similarity 40, member A	Rn.136895	362012	Fam40a
11.3105	11.6567	11.8028	11.0493	11.2174	11.3125	11.5162	11.7248	11.8193	2539.8	3228.62	3572.7	2119.19	2381.08	2543.32	2929.02	3384.67	3613.8	0.175929	0.048396	0.083393	0.161001	0.13083	0.077141	0.045539	0.069306	0.109652	BE116838	1382330_at	Transcribed locus, strongly similar to NP_001004364.1 development and differentiation enhancing factor 2 [Mus musculus]	Rn.7704	-	-
9.98905	10.4368	10.4615	10.0399	10.3115	10.2764	10.1893	10.3381	10.385	1016.26	1386.08	1410.02	1052.72	1270.78	1240.24	1167.58	1294.43	1337.2	0.209455	0.043084	0.038286	0.063714	0.059417	0.051168	0.053654	0.076868	0.071209	BF395178	1388892_at	RAB2B, member RAS oncogene family	Rn.85120	305853	Rab2b
9.77965	10.2312	10.0105	9.97286	10.2064	10.1137	9.70722	10.0369	10.1016	878.958	1201.98	1031.48	1004.92	1181.5	1107.97	835.919	1050.53	1098.71	0.136898	0.040653	0.100837	0.135469	0.092973	0.11678	0.12199	0.087032	0.072607	BE107623	1385727_at	FGFR1 oncogene partner 2	Rn.68658	362463	Fgfr1op2
8.21801	8.70821	8.60763	8.13985	8.37568	8.41095	8.37544	8.54709	8.59504	297.761	418.247	390.081	282.058	332.147	340.368	332.092	374.051	386.692	0.189025	0.059406	0.078452	0.076964	0.052228	0.075806	0.12704	0.04349	0.059323	NM_080895	1370044_at	Fas apoptotic inhibitory molecule	Rn.106419	140930	Faim
6.08269	6.23047	6.67526	6.02434	5.83977	6.46818	5.96416	6.18626	6.41477	67.7754	75.0859	102.201	65.0889	57.2725	88.5352	62.4297	72.8199	85.3175	0.189429	0.170136	0.11988	0.082087	0.15652	0.136808	0.07683	0.110378	0.154949	BE117875	1381007_at	Transcribed locus	Rn.19649	-	-
9.16634	9.42229	9.34935	9.05688	9.39364	9.32185	8.97102	9.32665	9.36374	574.57	686.107	652.281	532.589	672.616	639.965	501.818	642.098	658.82	0.090125	0.051345	0.110032	0.0918	0.044113	0.098888	0.118877	0.079667	0.06666	NM_031596	1387012_at	Squamous cell carcinoma antigen recognized by T cells	Rn.25144	29678	Sart1
12.394	12.775	12.7335	12.7943	13.0243	13.1405	12.5419	12.7786	12.8	5382.27	7009.03	6810.29	7103.43	8331.15	9029.94	5963.32	7026.55	7131.55	0.168681	0.024814	0.055009	0.052003	0.031164	0.057241	0.04577	0.033025	0.007612	AI177503	1370190_at	H3 histone, family 3B	Rn.29857	117056	H3f3b
9.35027	9.70855	9.86122	9.45714	9.62262	9.75808	9.44753	9.58454	9.73804	652.697	836.69	930.086	702.883	788.31	865.914	698.216	767.775	853.969	0.094033	0.062321	0.058138	0.060855	0.052406	0.04615	0.052259	0.05037	0.066285	BI282898	1376261_at	BCL2-associated athanogene 5	Rn.76368	366734	Bag5
6.91347	7.50028	7.01298	5.20531	5.40963	5.47052	6.89961	7.3691	6.99807	120.549	181.054	129.157	36.8939	42.507	44.3395	119.396	165.318	127.829	0.123424	0.110751	0.066692	0.125878	0.172619	0.12261	0.136601	0.143506	0.154368	BF417890	1380270_at	Antigen p97 (melanoma associated) identified by monoclonal antibodies 133.2 and 96.5	Rn.85934	288038	Mfi2
11.5261	11.7393	11.9619	11.4494	11.6267	11.8086	11.5353	11.6562	11.9855	2949.18	3418.86	3989.24	2796.49	3162.17	3587.09	2968.05	3227.5	4055.04	0.154092	0.066827	0.067366	0.051194	0.060428	0.126149	0.06312	0.052753	0.052806	BE111640	1371893_at	Collagen, type IV, alpha 3 (Goodpasture antigen) binding protein	Rn.105704	365652	Col4a3bp
11.8392	12.1782	12.1111	12.3603	12.6607	12.6906	11.8608	12.1944	12.072	3663.99	4634.51	4423.89	5258.01	6475.16	6610.76	3719.26	4686.84	4305.6	0.075089	0.054171	0.133143	0.047221	0.019598	0.05707	0.052328	0.082501	0.061897	X03369	1388131_at	Tubulin, beta 2b	Rn.37849	291081	Tubb2b
7.47459	7.60527	7.82817	7.38863	7.50314	7.79277	7.38196	7.57224	7.92727	177.859	194.722	227.255	167.571	181.414	221.747	166.798	190.314	243.414	0.135222	0.051962	0.077391	0.132733	0.077757	0.054337	0.162157	0.162188	0.059491	BE099830	1373516_at	Ribosomal RNA processing 1 homolog B (S. cerevisiae)	Rn.54275	309673	Rrp1b
7.89715	8.36235	8.09287	7.49856	8.01393	7.61309	8.00048	8.35681	8.08359	238.385	329.093	273.021	180.839	258.484	195.78	256.085	327.831	271.271	0.078099	0.059119	0.07522	0.119638	0.049338	0.134381	0.082761	0.047886	0.076854	BE115227	1393223_a_at	Similar to RIKEN cDNA 1110008J03	Rn.20168	288683	RGD1306772
9.86691	10.2643	9.96249	9.57876	10.2304	9.7427	9.87923	10.1906	9.95697	933.761	1229.88	997.719	764.705	1201.32	856.732	941.769	1168.63	993.909	0.111883	0.039967	0.051553	0.073693	0.06832	0.078003	0.141601	0.121414	0.033132	AA858667	1371591_at	Mitochondrial ribosomal protein S18A	Rn.103049	301249	Mrps18a
9.00997	9.26789	9.50164	9.15254	9.37917	9.48684	9.19764	9.37406	9.47216	515.551	616.471	724.901	569.101	665.904	717.502	587.172	663.549	710.239	0.156979	0.063561	0.040372	0.038354	0.044734	0.076915	0.070943	0.047978	0.060734	AI059937	1380310_at	Zinc finger, AN1-type domain 1	Rn.19319	361917	Zfand1
7.90525	8.1998	8.07836	7.84161	8.49594	8.07188	7.96813	8.26661	8.02591	239.727	294.026	270.289	229.382	361.021	269.078	250.407	307.962	260.639	0.104826	0.050479	0.060494	0.01898	0.073536	0.138567	0.043712	0.060817	0.033588	BF408856	1372891_at	COX19 cytochrome c oxidase assembly homolog (S. cerevisiae)	Rn.205089	304330	Cox19
9.66528	10.0705	9.67137	9.27622	9.72232	9.54828	9.54571	10.039	9.63156	811.969	1075.28	815.403	620.041	844.714	748.719	747.386	1052.06	793.211	0.121854	0.087815	0.104885	0.079671	0.083061	0.057371	0.124566	0.075403	0.080064	AI009334	1372634_at	ADP-ribosylhydrolase like 2	Rn.1834	362600	Adprhl2
6.97039	7.45162	7.26473	6.97807	7.45514	7.26812	7.19732	7.37378	7.19349	125.4	175.05	153.781	126.069	175.477	154.142	146.761	165.855	146.371	0.201146	0.110831	0.10461	0.080614	0.055144	0.093561	0.116297	0.086375	0.123109	BF282993	1371744_at	Transcribed locus, strongly similar to NP_065605.2 TH1 homolog [Mus musculus]	Rn.216578	-	-
9.75787	10.1116	10.2879	9.86973	9.9108	10.1646	9.95144	10.0977	10.306	865.788	1106.36	1250.16	935.588	962.605	1147.76	990.107	1095.75	1265.95	0.266145	0.038888	0.063584	0.053526	0.03729	0.078244	0.044973	0.025959	0.049997	AI232384	1371996_at	Transcribed locus	Rn.1477	-	-
5.30873	5.35003	5.35213	4.98317	5.83799	5.41262	5.05491	5.15218	5.16277	39.6357	40.7868	40.8462	31.6289	57.2019	42.5952	33.2414	35.5599	35.8219	0.067214	0.071795	0.080015	0.112435	0.073648	0.09626	0.068319	0.184141	0.045417	AI177292	1383131_at	Integrin beta 2	Rn.42962	309684	Itgb2
6.914	7.23453	7.13506	6.87679	7.03152	7.38482	6.77233	6.91764	7.15759	120.593	150.595	140.562	117.522	130.827	167.129	109.314	120.897	142.774	0.09125	0.089858	0.060139	0.092552	0.078063	0.143523	0.093089	0.06747	0.140455	BE105118	1395909_at	Transcribed locus	Rn.35489	-	-
5.88221	6.33983	6.22769	6.52308	6.8098	6.54707	5.89986	6.16093	6.25445	58.9823	80.9989	74.9413	91.9693	112.19	93.5114	59.7083	71.5525	76.3444	0.046374	0.145781	0.057593	0.096143	0.124602	0.136775	0.060679	0.105527	0.156082	AI029749	1377986_at	Short coiled-coil protein	Rn.18315	364981	Scoc
11.8558	12.1216	11.8641	11.4667	11.9842	11.7614	11.6306	12.0137	11.8751	3706.39	4456.21	3727.78	2830.22	4051.39	3471.64	3170.73	4135.08	3756.31	0.079467	0.053566	0.057279	0.092709	0.034999	0.039903	0.143898	0.061813	0.100135	D88891	1370313_at	Acyl-CoA thioesterase 7	Rn.6024	26759	Acot7
11.1843	11.7631	11.4532	11.1504	11.6027	11.2371	11.4376	11.6981	11.4772	2327.07	3475.73	2803.86	2273.03	3110	2413.82	2773.71	3322.61	2850.9	0.109081	0.049642	0.082208	0.099853	0.05014	0.100362	0.093467	0.037033	0.046803	AI103250	1371683_at	LSM4 homolog, U6 small nuclear RNA associated (S. cerevisiae)	Rn.27306	290647	Lsm4
7.11218	7.40488	7.36444	7.04505	7.39429	7.30423	7.03276	7.30059	7.36841	138.35	169.469	164.785	132.06	168.23	158.049	130.94	157.651	165.239	0.115895	0.078642	0.097907	0.15564	0.050477	0.110177	0.113746	0.072039	0.093645	AI407943	1379876_at	Component of oligomeric golgi complex 7	Rn.23781	293456	Cog7
8.94018	9.26354	9.07844	8.68366	9.01817	8.98306	8.85395	9.21977	9.1408	491.205	614.615	540.608	411.19	518.489	506.023	462.705	596.249	564.488	0.141377	0.056303	0.058672	0.063626	0.066765	0.056049	0.07876	0.051721	0.052294	AA818183	1374289_at	Polymerase (RNA) I polypeptide C	Rn.107990	301246	Polr1c
3.16275	3.38263	3.62317	3.18685	3.53804	3.6343	3.24138	3.35779	3.36141	8.95535	10.4297	12.322	9.10621	11.616	12.4175	9.45698	10.2517	10.2774	0.058527	0.053026	0.200995	0.063249	0.124255	0.13644	0.037012	0.047127	0.094518	AI406286	1391091_at	Cylindromatosis (turban tumor syndrome)	Rn.168938	312937	Cyld
8.19841	8.62763	8.59973	8.65	8.82274	8.92663	8.43972	8.65522	8.68124	293.743	395.526	387.951	401.707	452.803	486.613	347.223	403.163	410.5	0.107362	0.036135	0.091944	0.060634	0.1113	0.099963	0.089516	0.078481	0.092351	AI576469	1384508_at	Transcribed locus, moderately similar to NP_033341.1 TAF6 RNA polymerase II, TATA box binding protein (TBP)-associated factor	Rn.202662	-	-
5.76716	6.23772	5.63527	5.0642	5.6343	5.43357	5.56913	5.82467	5.68078	54.4613	75.4642	49.7033	33.4562	49.6699	43.2183	47.4761	56.6762	51.2962	0.089844	0.081132	0.153181	0.115221	0.086962	0.046323	0.148794	0.07285	0.149179	AI599423	1388792_at	Growth arrest and DNA-damage-inducible, gamma	Rn.16950	291005	Gadd45g
9.14565	9.54206	9.73764	9.63713	9.62384	9.92974	9.37818	9.45183	9.70725	566.389	745.498	853.732	796.279	788.977	975.326	665.447	700.3	835.937	0.198015	0.034975	0.077253	0.055404	0.086673	0.08539	0.041974	0.049999	0.081825	AA851914	1372032_at	Transcribed locus	Rn.11271	-	-
10.7092	10.8331	11.0678	11.2804	11.4387	11.6795	10.6737	10.9324	11.1011	1674.13	1824.27	2146.54	2487.36	2775.82	3280.05	1633.44	1954.25	2196.67	0.157853	0.07654	0.108333	0.106175	0.057253	0.156036	0.111033	0.136838	0.065121	BI294696	1390832_at	Transmembrane and coiled-coil domain family 3	Rn.19106	314751	Tmcc3
6.84237	7.18564	6.96917	6.5105	6.90247	6.8042	6.87718	7.31579	7.00618	114.752	145.577	125.294	91.1708	119.633	111.755	117.554	159.321	128.549	0.132724	0.056437	0.0302	0.081206	0.062276	0.10747	0.083941	0.110223	0.095061	BG376997	1373737_at	WAS protein family homolog 2	Rn.15475	367328	Wash2
8.13945	8.51081	8.16321	7.8544	8.32433	8.17273	8.07745	8.42168	8.26019	281.98	364.762	286.663	231.425	320.533	288.56	270.119	342.909	306.595	0.160353	0.064717	0.126623	0.09202	0.076192	0.058174	0.127296	0.056924	0.089794	AI171289	1388723_at	Brain and reproductive organ-expressed protein	Rn.1432	362704	Bre
7.16939	7.56596	7.16614	6.93612	7.48584	7.12843	7.07084	7.53251	7.13856	143.947	189.488	143.623	122.456	179.251	139.917	134.442	185.145	140.903	0.058049	0.090104	0.11861	0.092473	0.106886	0.0952	0.144994	0.125437	0.090684	AI178830	1373662_at	Torsin family 2, member A	Rn.13187	362112	Tor2a
8.08171	8.23001	8.39054	6.72246	7.00893	7.22042	8.01782	8.11323	8.39112	270.918	300.248	335.586	105.6	128.795	149.129	259.182	276.902	335.721	0.138663	0.082123	0.110932	0.074246	0.139785	0.106144	0.141877	0.128712	0.050133	AA892299	1383222_at	CDNA clone IMAGE:7446637	Rn.1708	-	-
10.7762	10.9992	10.7688	9.7193	10.427	10.1184	10.7738	11.035	10.8161	1753.72	2046.86	1744.74	842.948	1376.7	1111.58	1750.8	2098.29	1802.9	0.086699	0.093359	0.148106	0.108495	0.085519	0.072715	0.122935	0.066591	0.147465	X02904	1388122_at	Glutathione S-transferase pi	Rn.87063	29438	-
7.9409	8.16352	8.24826	7.92939	7.84502	8.33214	7.91712	8.00843	8.59997	245.725	286.724	304.07	243.772	229.925	322.273	241.708	257.5	388.015	0.232865	0.114862	0.130015	0.059709	0.08649	0.216173	0.064242	0.090612	0.239835	BG663870	1395516_at	Similar to hypothetical protein FLJ10154	Rn.106929	290912	RGD1310061
7.32221	7.71086	7.68385	7.57759	7.87071	7.81635	7.36356	7.59166	7.58594	160.031	209.508	205.622	191.021	234.056	225.401	164.684	192.893	192.13	0.093757	0.081133	0.088359	0.073986	0.064217	0.102157	0.102814	0.115198	0.111637	AF202049	1370446_at	Non-metastatic cells 7, protein expressed in (nucleoside-diphosphate kinase)	Rn.82718	171566	Nme7
7.61083	7.91465	7.96301	7.99729	8.09874	8.22941	7.53251	7.75879	8.02692	195.474	241.294	249.52	255.52	274.134	300.123	185.145	216.585	260.822	0.077519	0.086756	0.095127	0.126266	0.10546	0.093245	0.056844	0.084462	0.148265	AI136674	1383385_at	Transcribed locus	Rn.22852	-	-
7.15933	7.39564	7.45138	6.9508	7.24547	7.23176	7.0317	7.298	7.39646	142.946	168.387	175.02	123.708	151.741	150.306	130.844	157.368	168.483	0.076973	0.09124	0.043929	0.064779	0.06704	0.039207	0.102227	0.04627	0.101541	AW917092	1389569_at	Brix domain containing 2	Rn.17880	294799	Bxdc2
11.5938	11.9154	12.1339	11.6738	11.8257	12.0342	11.8142	11.8546	12.0841	3090.88	3862.72	4494.36	3267.11	3629.86	4194.26	3601.05	3703.31	4341.87	0.056761	0.080741	0.083488	0.078573	0.093928	0.064218	0.088741	0.071951	0.084637	AW531898	1385577_at	ESTs	-	-	-
8.05357	8.13638	8.26536	7.97236	8.18227	8.35926	7.80377	8.04636	8.35726	265.684	281.381	307.696	251.142	290.475	328.389	223.444	264.36	327.934	0.148935	0.064266	0.133861	0.085423	0.048022	0.094367	0.085078	0.077043	0.109257	BE115928	1390661_at	Transcribed locus	Rn.203846	-	-
8.20846	8.68183	8.44298	7.9103	8.29179	7.94294	8.27742	8.69739	8.41131	295.796	410.668	348.009	240.568	313.384	246.073	310.279	415.122	340.453	0.075289	0.058934	0.038313	0.094305	0.05294	0.140963	0.102953	0.067604	0.092043	AI104152	1386259_a_at	Similar to RIKEN cDNA 1110008J03	Rn.20168	288683	RGD1306772
9.18629	9.3993	9.49562	8.93429	9.27237	9.31285	9.15732	9.33423	9.45691	582.571	675.26	721.882	489.203	618.389	635.985	570.989	645.481	702.771	0.101293	0.078202	0.068182	0.089256	0.079218	0.06508	0.07651	0.098933	0.05803	AA943573	1373199_at	Galactosidase, alpha	Rn.98982	363494	Gla
4.18975	4.47556	4.42267	4.4765	4.84724	4.77184	4.25845	4.43194	4.61599	18.2491	22.2473	21.4465	22.2618	28.7849	27.3191	19.1391	21.5847	24.5217	0.089066	0.067796	0.046099	0.044111	0.098879	0.182654	0.148416	0.054509	0.114852	AA964590	1384858_a_at	UTP23, small subunit (SSU) processome component, homolog (yeast)	Rn.24551	299900	Utp23
7.99859	8.40284	8.19418	7.63615	8.07435	7.98611	8.06551	8.23003	8.20766	255.75	338.46	292.883	198.935	269.539	253.547	267.892	300.252	295.632	0.097413	0.021202	0.042098	0.079206	0.089941	0.04587	0.074774	0.100931	0.074179	BM386451	1373741_at	Pseudouridylate synthase 1	Rn.11475	304567	Pus1
5.3874	5.67569	5.57496	5.29687	5.55177	5.50488	5.13755	5.52803	5.51811	41.8571	51.1155	47.6684	39.3112	46.9083	45.4082	35.2011	46.1427	45.8265	0.123212	0.08235	0.067729	0.126022	0.113347	0.113108	0.080742	0.040616	0.136805	BE100468	1377062_at	Centrosomal protein 250kDa	Rn.41835	311573	Cep250
6.379	6.57551	6.75881	6.2351	6.43574	6.63293	6.3276	6.50745	6.67388	83.2282	95.3731	108.294	75.3273	86.5667	99.2455	80.3151	90.9783	102.103	0.075721	0.075816	0.135584	0.096799	0.02874	0.064476	0.114205	0.111247	0.074008	AI172553	1382288_at	Thyroid hormone receptor interactor 4	Rn.102294	315769	Trip4
5.23492	5.66514	5.19877	5.28069	5.66872	5.40019	5.30775	5.87	5.4712	37.6589	50.7431	36.727	38.8728	50.8692	42.2298	39.6088	58.4852	44.3604	0.071305	0.163677	0.142711	0.110276	0.163191	0.098546	0.157928	0.143344	0.120399	BI287409	1383804_at	Transcribed locus	Rn.46222	-	-
7.44248	7.76695	7.72966	7.88055	7.87805	8.10498	7.33964	7.72857	7.78888	173.944	217.814	212.256	235.658	235.25	275.323	161.976	212.095	221.15	0.151833	0.072404	0.069113	0.07308	0.056545	0.028403	0.114236	0.048436	0.055111	AI556892	1391699_at	Polymerase (RNA) II (DNA directed) polypeptide F	Rn.28212	83503	Polr2f
8.79344	8.92711	8.89503	8.71811	9.11185	9.15509	8.61763	8.86739	8.97893	443.7	486.775	476.07	421.127	553.274	570.107	392.794	467.036	504.577	0.097775	0.093309	0.038858	0.084845	0.057318	0.062563	0.098923	0.035594	0.068275	AW525211	1373640_at	Pyrroline-5-carboxylate reductase family, member 2	Rn.137266	364064	Pycr2
10.2212	10.5788	10.4772	9.7128	10.0271	10.0526	10.2149	10.3794	10.4849	1193.68	1529.45	1425.45	839.159	1043.42	1062.02	1188.48	1332.02	1433.08	0.126883	0.062266	0.095246	0.06708	0.049139	0.067551	0.09316	0.077097	0.050504	BF420494	1380548_at	Intraflagellar transport 57 homolog (Chlamydomonas)	Rn.63846	303968	Ift57
6.9493	7.17586	7.28616	7.06899	7.39585	7.40705	7.1385	7.29532	7.45069	123.58	144.594	156.082	134.27	168.412	169.724	140.897	157.076	174.937	0.117552	0.063806	0.091792	0.101835	0.054967	0.075895	0.048078	0.106041	0.057953	AI102175	1392517_at	Basic leucine zipper nuclear factor 1	Rn.11987	498266	Blzf1
7.87115	8.17657	8.40079	8.74436	8.72917	8.97428	7.94243	8.12015	8.35703	234.127	289.33	337.979	428.859	424.367	502.953	245.986	278.233	327.881	0.136434	0.077475	0.033868	0.105405	0.143415	0.084115	0.124842	0.076409	0.066259	BF386294	1380883_at	Transcribed locus, strongly similar to XP_341328.3 PREDICTED: hypothetical protein [Rattus norvegicus]	Rn.14588	-	-
9.10195	9.22269	9.6715	9.25559	9.0922	9.69117	9.12422	9.20781	9.63698	549.49	597.457	815.477	611.238	545.789	826.671	558.038	591.326	796.196	0.183694	0.050306	0.073509	0.043187	0.070616	0.144134	0.055354	0.07283	0.075638	AI102429	1390433_at	Regulator of chromosome condensation (RCC1) and BTB (POZ) domain containing protein 1	Rn.19335	361050	Rcbtb1
8.74708	9.20185	8.92408	8.4271	8.84181	8.62577	8.89588	9.15982	9.05962	429.668	588.888	485.753	344.199	458.828	395.017	476.351	571.98	533.602	0.185817	0.041041	0.065974	0.094892	0.097283	0.09776	0.069255	0.056292	0.069058	BE097240	1373121_at	Mitochondrial ribosomal protein S28	Rn.12952	689025	Mrps28
8.41247	8.68376	8.7292	8.40274	8.72683	8.73325	8.52131	8.73169	8.76295	340.726	411.218	424.376	338.436	423.68	425.569	367.426	425.109	434.421	0.18121	0.076763	0.077865	0.072059	0.077637	0.04954	0.101075	0.074696	0.066164	BM386170	1376664_at	Solute carrier family 7, member 6 opposite strand	Rn.18683	246187	Slc7a6os
9.85506	10.1828	9.62298	9.13936	9.78747	9.1151	9.39937	10.0861	9.44829	926.123	1162.33	788.507	563.925	883.735	554.522	675.293	1086.97	698.584	0.191583	0.114007	0.23494	0.124105	0.19964	0.17679	0.160815	0.207136	0.317366	NM_022300	1369310_at	Brain abundant, membrane attached signal protein 1	Rn.37779	64160	Basp1
9.30658	9.6634	9.6385	9.68196	9.99355	9.84478	9.48224	9.76785	9.72285	633.227	810.911	797.035	821.411	1019.43	919.547	715.218	871.798	845.025	0.199147	0.045401	0.044579	0.05733	0.032515	0.06706	0.03848	0.036209	0.027782	BF407158	1371385_at	Proteasome (prosome, macropain) assembly chaperone 1	Rn.82972	288236	Psmg1
9.10453	9.416	9.37059	8.56544	8.82042	8.81357	9.06546	9.32981	9.41143	550.474	683.122	661.955	378.839	452.076	449.934	535.766	643.506	680.962	0.102931	0.050414	0.100943	0.056367	0.054171	0.059426	0.114664	0.053525	0.093122	BM389456	1383454_a_at	Ribosomal protein S6 kinase, polypeptide 1	Rn.101893	289342	Rps6kc1
7.11735	7.5073	7.09305	6.60726	6.96844	6.92066	6.99484	7.4304	7.15891	138.847	181.938	136.528	97.4952	125.23	121.151	127.543	172.494	142.905	0.134017	0.041518	0.149634	0.078065	0.057744	0.107593	0.11472	0.081666	0.049246	NM_022596	1386942_at	Golgi autoantigen, golgin subfamily a, 2	Rn.6165	64528	Golga2
11.0553	11.4068	11.3349	11.4312	11.9451	11.603	11.2916	11.4769	11.4447	2128.03	2715.12	2583.12	2761.43	3943.06	3110.65	2506.75	2850.3	2787.39	0.154228	0.071511	0.064369	0.071342	0.053823	0.15906	0.057433	0.109863	0.031711	NM_031065	1367580_at	Ribosomal protein L10A	Rn.2262	81729	Rpl10a
10.9916	11.2339	11.3672	11.0218	11.2069	11.3813	11.086	11.2366	11.4438	2036.11	2408.47	2641.61	2079.18	2363.81	2667.55	2173.79	2412.98	2785.65	0.221	0.049926	0.029407	0.024134	0.036381	0.054715	0.053681	0.021604	0.025793	AI236780	1372287_at	Myotubularin related protein 6	Rn.11877	305935	Mtmr6
6.29764	6.50662	6.63035	7.80375	8.02407	8.31475	6.50775	6.65589	6.74404	78.6645	90.9259	99.0682	223.441	260.307	318.412	90.9972	100.838	107.191	0.073621	0.094298	0.064826	0.164892	0.157447	0.115834	0.078529	0.047258	0.13137	BM385779	1388945_at	Similar to 1300014I06Rik protein	Rn.6535	361238	RGD1311307
8.42083	8.85826	8.95086	8.37698	8.55652	8.57355	8.64068	8.75812	8.81516	342.707	464.09	494.854	332.447	376.504	380.974	399.12	432.969	450.43	0.086972	0.079221	0.071166	0.076736	0.035765	0.139959	0.071675	0.061152	0.045681	AI411610	1374154_at	Splicing factor, arginine/serine-rich 2, interacting protein	Rn.199124	312030	Sfrs2ip
3.1312	3.38609	3.23362	3.16898	3.5747	3.51704	3.19253	3.32386	3.6033	8.76163	10.4548	9.40625	8.99411	11.9149	11.4481	9.14213	10.0134	12.1535	0.056054	0.085408	0.126123	0.058763	0.102792	0.16957	0.051704	0.090218	0.134942	AI574925	1392259_at	HECT domain containing 1	Rn.36797	362736	Hectd1
7.88581	8.15252	8.10791	6.57719	6.6888	6.94525	7.61496	7.87711	8.0451	236.519	284.546	275.882	95.4842	103.164	123.233	196.034	235.097	264.129	0.122943	0.044688	0.114937	0.050036	0.104688	0.080881	0.112557	0.062152	0.106579	AI717053	1376923_at	Transcribed locus	Rn.205674	-	-
9.31266	9.57759	9.45243	9.11129	9.47068	9.43357	9.20767	9.47321	9.52772	635.902	764.085	700.592	553.059	709.51	691.493	591.269	710.756	738.124	0.046072	0.040062	0.087618	0.052214	0.07605	0.098523	0.066428	0.06156	0.064799	AW520344	1383157_at	Mitochondrial ribosomal protein L44	Rn.3298	301552	Mrpl44
10.0837	10.6622	10.4271	10.2449	10.6025	10.3997	10.4612	10.6505	10.444	1085.17	1620.47	1376.8	1213.45	1554.79	1350.9	1409.73	1607.39	1393.02	0.246314	0.022042	0.103213	0.076745	0.101073	0.06655	0.077492	0.102428	0.042031	NM_017125	1367709_at	Cd63 molecule	Rn.11068	29186	Cd63
5.4164	5.7764	5.71459	5.4815	5.9001	5.74422	5.4421	5.75367	5.43404	42.707	54.8112	52.5125	44.6782	59.7183	53.6022	43.4746	53.9544	43.2324	0.085283	0.095441	0.114418	0.059024	0.143061	0.097078	0.076583	0.079829	0.071313	NM_053908	1368010_at	Protein tyrosine phosphatase, non-receptor type 6	Rn.18985	116689	Ptpn6
7.62772	8.10706	7.93846	7.73704	8.05433	7.73067	7.69675	8.04708	7.87748	197.776	275.72	245.31	213.344	265.824	212.404	207.469	264.492	235.157	0.116655	0.051461	0.082097	0.057133	0.076149	0.116869	0.1118	0.069589	0.133263	BF414210	1370066_at	Kelch-like ECH-associated protein 1	Rn.23467	117519	Keap1
7.83267	8.21796	8.31644	8.5819	8.58677	8.8552	8.0061	8.13356	8.35677	227.965	297.75	318.785	383.186	384.481	463.106	257.085	280.831	327.822	0.26135	0.034316	0.060004	0.076591	0.080329	0.036257	0.081745	0.102884	0.069438	AA874896	1379623_at	Similar to chromosome 10 open reading frame 4; similar to putative acid phosphatase F26C11.1	Rn.23684	365458	RGD1309482
4.51419	4.55803	5.00529	4.39713	4.34056	4.64575	4.2557	4.44457	4.89412	22.8511	23.5561	32.1176	21.0702	20.26	25.0328	19.1026	21.7745	29.7356	0.080364	0.129837	0.110791	0.168502	0.079441	0.165542	0.088064	0.169469	0.098092	BF288329	1379869_at	Transcribed locus	Rn.30220	-	-
8.26485	8.39215	8.4365	7.75479	8.08771	8.19463	8.05443	8.32041	8.37101	307.587	335.961	346.449	215.985	272.047	292.974	265.843	319.663	331.074	0.07356	0.049018	0.053562	0.105868	0.085686	0.03391	0.107641	0.050829	0.089616	BE100918	1374050_at	RUN and FYVE domain containing 1	Rn.39348	360521	Rufy1
7.29357	7.62815	7.52645	7.42812	7.80614	7.75291	7.18203	7.30277	7.453	156.886	197.834	184.369	172.221	223.811	215.704	145.213	157.889	175.217	0.054357	0.049309	0.096162	0.076587	0.071052	0.136343	0.052586	0.20069	0.095647	BI275749	1389167_at	Mitogen-activated protein kinase associated protein 1	Rn.105886	296648	Mapkap1
8.9358	9.07524	9.02151	8.52338	9.07203	8.87819	8.71761	9.02512	8.90687	489.715	539.411	519.691	367.954	538.212	470.545	420.981	520.993	479.993	0.166144	0.025996	0.077411	0.093087	0.099184	0.061927	0.113347	0.092339	0.09784	H31907	1373573_at	PP3111 protein	Rn.179335	246185	Pp3111
9.54829	9.79522	9.71124	9.19851	9.49969	9.62311	9.45271	9.68567	9.74526	748.724	888.495	838.252	587.526	723.922	788.578	700.728	823.526	858.253	0.091236	0.046553	0.071492	0.059177	0.046595	0.064802	0.087188	0.051474	0.076206	AI549477	1372207_at	Bromodomain containing 8	Rn.98723	291691	Brd8
9.02223	9.50271	9.11338	9.06201	9.52464	9.17575	9.00636	9.44403	9.01429	519.95	725.439	553.861	534.487	736.55	578.33	514.262	696.524	517.097	0.148241	0.034569	0.113648	0.049423	0.074939	0.086414	0.093255	0.072654	0.12636	AW918650	1372134_at	Coiled-coil-helix-coiled-coil-helix domain containing 6	Rn.6212	297436	Chchd6
10.1158	10.375	10.3881	9.95168	10.1564	10.3221	10.0748	10.346	10.3617	1109.58	1327.96	1340.08	990.271	1141.25	1280.15	1078.49	1301.54	1315.78	0.192483	0.04775	0.108599	0.067428	0.051313	0.092059	0.076511	0.050503	0.088618	BF420262	1374858_at	Transcribed locus, strongly similar to NP_061903.2 DEAH (Asp-Glu-Ala-His) box polypeptide 29 [Homo sapiens]	Rn.103224	-	-
9.9401	10.3591	10.1863	10.0328	10.1836	10.365	9.98123	10.214	10.2525	982.355	1313.41	1165.15	1047.55	1162.97	1318.79	1010.76	1187.74	1219.86	0.167922	0.031358	0.100706	0.070392	0.04411	0.136962	0.063386	0.075332	0.086767	AW534728	1389289_at	Ewing sarcoma breakpoint region 1	Rn.52785	289752	Ewsr1
8.8039	8.89452	9.08542	8.73441	8.75879	9.12061	8.57605	8.88394	9.0935	446.928	475.902	543.23	425.912	433.17	556.644	381.635	472.425	546.281	0.094162	0.071275	0.099465	0.081947	0.067183	0.100841	0.068861	0.059192	0.070197	BI280303	1378120_at	mRNA turnover 4 homolog (S. cerevisiae)	-	-	-
10.6952	10.9995	10.7072	10.2774	10.8155	10.4876	10.6375	11.0393	10.7727	1657.97	2047.29	1671.82	1241.1	1802.15	1435.76	1592.97	2104.56	1749.47	0.190855	0.050957	0.084155	0.09335	0.0809	0.076923	0.087067	0.036527	0.048954	AI408157	1398868_at	Translocase of inner mitochondrial membrane 13 homolog (yeast)	Rn.2109	252928	Timm13
7.66681	8.03864	7.89499	7.75431	8.07308	8.08433	7.65876	7.87847	7.84441	203.208	262.949	238.028	215.914	269.302	271.41	202.077	235.318	229.828	0.155552	0.036638	0.040292	0.077575	0.081218	0.109716	0.106116	0.064148	0.057103	BM384217	1391046_at	SET and MYND domain containing 3	Rn.28284	498295	Smyd3
7.05817	7.25187	7.53738	7.11267	7.26562	7.43808	7.02475	7.02445	7.4758	133.266	152.416	185.771	138.397	153.876	173.414	130.215	130.188	178.008	0.121888	0.089099	0.155914	0.104098	0.060278	0.125824	0.091229	0.091195	0.108877	AI712672	1377424_at	Deoxyuridine triphosphatase	Rn.6102	497778	Dut
9.44675	9.99818	9.64143	9.48045	9.68422	9.60319	9.57326	9.93017	9.75882	697.839	1022.71	798.656	714.332	822.698	777.765	761.796	975.616	866.358	0.205262	0.058843	0.133959	0.068882	0.101881	0.089342	0.101769	0.074928	0.073456	BI296551	1390104_at	Immunity-related GTPase family, Q	Rn.32553	292708	Irgq
9.78717	10.0502	10.08	9.80104	10.0129	10.1278	9.83065	10.0607	10.1615	883.551	1060.26	1082.39	892.087	1033.2	1118.85	910.585	1068	1145.29	0.151615	0.039651	0.071868	0.044838	0.069374	0.044586	0.092926	0.053529	0.039723	AI599187	1377676_at	Nuclear casein kinase and cyclin-dependent kinase substrate 1	Rn.21324	64709	Nucks1
9.18044	9.40067	9.4335	8.99442	9.2385	9.36505	9.18089	9.47287	9.45393	580.213	675.902	691.459	510.024	604.04	659.418	580.394	710.588	701.32	0.113623	0.046749	0.09706	0.054285	0.071436	0.074028	0.094316	0.061899	0.082288	AI410700	1372591_at	Transmembrane protein 11	Rn.12974	303196	Tmem11
5.40676	5.23378	6.25763	6.07366	5.65088	6.55364	5.52502	5.2617	6.20149	42.4226	37.6292	76.5128	67.3525	50.244	93.9382	46.0465	38.3645	73.5927	0.338332	0.132052	0.391457	0.149505	0.239263	0.392171	0.245957	0.234951	0.389101	AI011930	1379689_at	Ring finger and CCCH-type zinc finger domains 2	Rn.134067	311909	Rc3h2
7.3025	7.84011	7.81347	8.00416	8.03026	8.0556	7.48634	7.75856	7.6546	157.86	229.144	224.951	256.739	261.426	266.059	179.313	216.551	201.495	0.154495	0.065899	0.060127	0.076626	0.122836	0.059832	0.086821	0.101828	0.05097	BF554283	1383119_at	Opioid growth factor receptor-like 1	Rn.35627	316290	Ogfrl1
7.30004	7.6909	7.53548	7.10499	7.49333	7.35429	7.38187	7.58165	7.55434	157.591	206.629	185.526	137.662	180.184	163.63	166.788	191.56	187.968	0.104559	0.065715	0.085384	0.066239	0.056539	0.089359	0.105625	0.139503	0.106126	NM_022546	1367621_at	Death-associated protein kinase 3	Rn.60353	64391	Dapk3
8.42724	8.85267	8.99537	9.03839	9.21936	9.07306	8.79007	8.97415	8.9782	344.233	462.295	510.359	525.807	596.079	538.596	442.665	502.908	504.322	0.184991	0.070572	0.070471	0.076805	0.069331	0.115423	0.037969	0.047958	0.087285	BG380742	1398918_at	Zinc finger, AN1-type domain 3	Rn.136939	361816	Zfand3
9.99255	10.3178	10.1047	9.33754	9.63768	9.5622	9.8497	10.264	10.1028	1018.73	1276.34	1101.08	646.963	796.583	755.978	922.689	1229.62	1099.63	0.099665	0.041575	0.044333	0.065695	0.063241	0.084856	0.090638	0.070786	0.078987	BI294698	1371904_at	SET and MYND domain containing 2	Rn.7052	289372	Smyd2
8.19368	8.7604	8.47644	8.4838	8.77768	8.472	8.36644	8.69022	8.49154	292.781	433.654	356.174	357.996	438.879	355.08	330.027	413.064	359.922	0.187862	0.074613	0.101829	0.105577	0.073713	0.143117	0.106577	0.1103	0.049588	BI296329	1372499_at	Transcribed locus, moderately similar to NP_001100241.1 ankyrin repeat domain 24 [Rattus norvegicus]	Rn.4291	-	-
11.1833	11.6247	11.522	11.4527	11.8021	11.5431	11.4112	11.6781	11.5361	2325.46	3157.79	2940.81	2802.89	3570.97	2984.14	2723.41	3276.86	2969.7	0.254295	0.04314	0.044486	0.037028	0.048382	0.080592	0.070421	0.046749	0.050954	BG666659	1371384_at	Basic transcription factor 3	Rn.1858	294680	Btf3
8.05167	8.41199	8.21433	7.71699	8.04592	8.00785	8.02318	8.28392	8.25349	265.335	340.613	297.002	210.4	264.279	257.397	260.146	311.68	305.174	0.081542	0.078666	0.132046	0.139763	0.088974	0.094806	0.084798	0.106555	0.102552	NM_030844	1367787_at	Islet cell autoantigen 1	Rn.1379	81024	Ica1
9.05339	9.42632	9.30359	9.21693	9.56279	9.26955	9.09422	9.45074	9.33397	531.303	688.026	631.916	595.076	756.287	617.181	546.554	699.771	645.364	0.100285	0.055001	0.090893	0.082741	0.084894	0.092848	0.099695	0.098695	0.140521	BI288882	1383227_at	Transcribed locus, strongly similar to NP_932112.2 ADP-ribosylation factor-like 16 [Mus musculus]	Rn.216408	-	-
8.36123	8.66732	8.83642	8.28985	8.42464	8.57015	8.50089	8.73984	8.68219	328.837	406.559	457.117	312.963	343.613	380.078	362.262	427.518	410.771	0.20947	0.062096	0.058509	0.07411	0.035779	0.062456	0.078122	0.058563	0.064722	BI289277	1391725_at	Transcribed locus	Rn.18260	-	-
5.2186	5.47407	5.32647	5.12059	5.65579	5.56257	5.31866	5.58739	5.26635	37.2353	44.4487	40.1261	34.7897	50.4153	47.2607	39.9095	48.0808	38.4884	0.114205	0.1013	0.107041	0.107408	0.098474	0.084929	0.103311	0.065779	0.0699	NM_031741	1368460_at	Solute carrier family 2 (facilitated glucose/fructose transporter), member 5	Rn.10900	65197	Slc2a5
5.84055	6.12427	6.10051	5.68387	5.9148	5.8621	5.71607	6.09814	6.00863	57.3034	69.7572	68.6178	51.4062	60.3298	58.1658	52.5664	68.5051	64.384	0.041355	0.070985	0.040711	0.074604	0.12495	0.097697	0.060542	0.074782	0.067231	BM385306	1391163_at	Elongation factor Tu GTP binding domain containing 1	Rn.204399	308789	Eftud1
9.42034	9.96563	9.65996	9.22029	9.61058	9.30382	9.69892	10.0254	9.66921	685.18	999.893	808.98	596.463	781.759	632.017	831.124	1042.19	814.183	0.131535	0.10273	0.124342	0.105386	0.092889	0.158041	0.144727	0.100062	0.092165	BF284776	1373424_at	DiGeorge syndrome critical region gene 6	Rn.22467	303794	Dgcr6
4.82054	5.15433	5.01823	4.93681	5.75793	5.13754	5.2922	5.5328	4.85592	28.2571	35.6129	32.4069	30.6287	54.114	35.2009	39.1842	46.2955	28.9586	0.254039	0.123926	0.116493	0.165032	0.09262	0.142482	0.087673	0.166002	0.21218	AI179588	1372621_at	Family with sequence similarity 176, member B	Rn.22919	362597	Fam176b
7.78592	8.21393	7.97357	7.59928	7.87825	7.87317	7.84207	8.10087	8.03133	220.697	296.92	251.353	193.915	235.282	234.455	229.455	274.54	261.62	0.088468	0.094095	0.132981	0.090983	0.084446	0.103193	0.116169	0.079934	0.093096	AA817907	1398957_at	Similar to cell division cycle 2-like 1	Rn.129782	315362	RGD1566355
6.94308	7.32815	7.20559	6.89717	7.11889	7.22678	6.97297	7.21176	7.15362	123.048	160.692	147.604	119.194	138.995	149.788	125.624	148.237	142.382	0.105596	0.102824	0.070187	0.036837	0.072468	0.034142	0.091995	0.100012	0.046704	BI282734	1388897_at	WD repeat domain 5	Rn.106818	362093	Wdr5
10.7769	11.1219	11.117	10.8216	11.0698	11.0349	10.7864	11.0023	11.0438	1754.57	2228.57	2221.01	1809.78	2149.52	2098.15	1766.16	2051.27	2111.13	0.054167	0.051686	0.024414	0.090926	0.059173	0.050824	0.053685	0.059933	0.060202	BI275054	1389810_at	Superkiller viralicidic activity 2-like 2 (S. cerevisiae)	Rn.145315	365668	Skiv2l2
11.02	11.5222	11.4065	11.0719	11.2593	11.124	11.1476	11.4259	11.3209	2076.59	2941.22	2714.56	2152.65	2451.25	2231.81	2268.62	2751.3	2558.18	0.168772	0.086746	0.050789	0.033923	0.045967	0.037352	0.070664	0.107732	0.081032	NM_130428	1367678_at	Succinate dehydrogenase complex, subunit A, flavoprotein (Fp)	Rn.101725	157074	Sdha
9.84671	10.5003	10.3467	10.3599	10.5175	10.2537	10.2145	10.4774	10.2243	920.778	1448.46	1302.17	1314.14	1465.83	1220.88	1188.15	1425.65	1196.25	0.182938	0.046145	0.100916	0.086531	0.06889	0.074611	0.080123	0.06663	0.06004	AA850511	1389291_at	Coiled-coil-helix-coiled-coil-helix domain containing 3	Rn.106389	296966	Chchd3
8.44926	8.7893	9.12114	9.39792	9.34828	9.69196	8.84178	8.76923	9.14728	349.527	442.428	556.848	674.615	651.797	827.124	458.819	436.316	567.03	0.270649	0.059159	0.103914	0.06167	0.062303	0.059885	0.099626	0.074772	0.102293	AI412317	1375658_at	Transcribed locus	Rn.22768	-	-
5.41218	5.51166	5.53773	4.8318	5.15873	5.30199	5.18711	5.38672	5.54915	42.5822	45.6221	46.454	28.4785	35.7217	39.451	36.4314	41.8374	46.8231	0.064602	0.079938	0.082518	0.106091	0.066651	0.084939	0.118808	0.127891	0.11142	AW144184	1383182_at	SFRS protein kinase 1	Rn.2688	361811	Srpk1
9.32173	9.50044	9.50118	9.92781	10.3172	10.4548	9.18725	9.24163	9.42846	639.912	724.298	724.67	974.022	1275.81	1403.49	582.959	605.352	689.048	0.055191	0.091778	0.095776	0.08822	0.051237	0.109655	0.073484	0.135155	0.152732	AI237606	1379368_at	B-cell CLL/lymphoma 6	Rn.20571	303836	Bcl6
6.99263	7.17996	7.24471	7.29795	7.45562	7.74651	6.95522	7.21193	7.25474	127.348	145.005	151.661	157.363	175.536	214.749	124.088	148.254	152.719	0.102795	0.105194	0.054732	0.053484	0.072096	0.085864	0.07012	0.071928	0.062421	AW535558	1385024_at	CutC copper transporter homolog (E.coli)	Rn.13248	361760	Cutc
8.5288	8.92238	8.70335	8.41014	8.78822	8.46719	8.54659	8.90764	8.77002	369.339	485.181	416.84	340.177	442.097	353.898	373.921	480.249	436.555	0.212436	0.084125	0.080702	0.067912	0.061391	0.073772	0.126995	0.083122	0.081016	AI176608	1371296_at	Succinate dehydrogenase complex, subunit D, integral membrane protein	Rn.3040	363061	Sdhd
8.5679	8.74817	8.49846	8.57502	9.10511	8.96691	8.34266	8.7116	8.47942	379.485	429.993	361.652	381.363	550.695	500.39	324.632	419.231	356.911	0.143431	0.06659	0.087495	0.069242	0.07094	0.064657	0.101325	0.074273	0.086909	BF544427	1383152_at	Chitinase domain containing 1	Rn.162505	293628	Chid1
9.50135	9.76772	9.37813	8.50988	9.17402	8.63645	9.30654	9.73542	9.42849	724.755	871.719	665.424	364.527	577.637	397.952	633.21	852.42	689.062	0.211952	0.048506	0.076341	0.102978	0.088096	0.094585	0.092006	0.051105	0.131493	AI058901	1376850_a_at	Chemokine (C-C motif) ligand 27	Rn.78371	362505	Ccl27
9.07541	9.36026	9.54501	9.39707	9.40914	9.75144	9.17071	9.18748	9.58207	539.474	657.232	747.024	674.217	679.882	861.938	576.313	583.052	766.462	0.257801	0.060598	0.094096	0.096097	0.051457	0.164336	0.07483	0.083419	0.092618	BM389886	1392761_at	Transcribed locus	Rn.154345	-	-
9.23654	9.72155	9.36379	8.87856	9.32708	9.02559	9.34434	9.67141	9.363	603.22	844.264	658.843	470.666	642.29	521.163	650.02	815.426	658.482	0.14836	0.061921	0.132761	0.06432	0.053313	0.077834	0.081745	0.0785	0.075157	AA799479	1388326_at	NADH dehydrogenase (ubiquinone) Fe-S protein 8	Rn.3373	293652	Ndufs8
11.9882	12.2579	12.3138	12.0355	12.1852	12.2821	11.9326	12.2089	12.2709	4062.63	4897.74	5091.24	4198.04	4657.05	4980.59	3909.04	4734.18	4942.07	0.090869	0.045791	0.055744	0.065016	0.113649	0.04946	0.072679	0.073963	0.084707	AI576297	1383326_a_at	Transcribed locus	Rn.122017	-	-
10.7243	10.9376	11.0303	10.8224	10.9508	11.1973	10.7427	10.9286	11.1285	1691.75	1961.31	2091.47	1810.79	1979.33	2348.14	1713.46	1949.11	2238.78	0.169194	0.061815	0.05907	0.066173	0.030993	0.07124	0.055852	0.04834	0.050394	BI289616	1376600_at	Transcribed locus	Rn.2868	-	-
13.0486	13.3555	13.4379	13.1909	13.3598	13.5068	13.1103	13.2091	13.4209	8472.66	10481.1	11097.1	9350.97	10512.4	11640	8842.88	9469.68	10967.1	0.204865	0.068253	0.067941	0.085673	0.042854	0.050363	0.097929	0.086167	0.066756	AA848449	1372720_at	BTB (POZ) domain containing 1	Rn.162445	293060	Btbd1
10.4713	10.7386	10.5154	9.9156	10.4402	10.1923	10.406	10.7524	10.5048	1419.63	1708.6	1463.7	965.813	1389.36	1170.01	1356.81	1725.02	1452.98	0.133374	0.038045	0.079873	0.048488	0.079137	0.09097	0.086581	0.034883	0.059	BI294944	1372128_at	Mitochondrial ribosomal protein S12	Rn.8526	292758	Mrps12
10.3231	10.6983	10.9105	10.6071	10.6407	10.961	10.6764	10.6313	10.8834	1281.04	1661.53	1924.81	1559.75	1596.5	1993.38	1636.5	1586.14	1888.99	0.216924	0.041658	0.096869	0.11339	0.046301	0.088211	0.074893	0.053289	0.085153	NM_131911	1386915_at	Acidic (leucine-rich) nuclear phosphoprotein 32 family, member B	Rn.20465	170724	Anp32b
7.41613	7.82288	7.50129	6.97931	7.32288	7.25264	7.35556	7.63706	7.54549	170.796	226.424	181.181	126.177	160.106	152.497	163.774	199.06	186.818	0.103692	0.074398	0.045371	0.061321	0.113635	0.061647	0.143343	0.071252	0.118985	AA965058	1381757_at	Hypothetical LOC305552	Rn.6266	305552	RGD1309501
8.69436	9.1692	9.04293	8.84056	9.16895	8.94933	8.88793	9.12718	8.94588	414.251	575.711	527.464	458.431	575.611	494.33	473.733	559.184	493.149	0.191527	0.078096	0.063622	0.097044	0.049918	0.086447	0.094605	0.112519	0.103639	AA892250	1371662_at	Lysyl-tRNA synthetase	Rn.46563	292028	Kars
8.2486	8.34056	8.73569	8.30186	8.46191	8.78601	8.40952	8.39611	8.72404	304.142	324.159	426.29	315.58	352.605	441.421	340.03	336.884	422.861	0.264611	0.062354	0.067085	0.06284	0.048659	0.102694	0.080538	0.061144	0.09503	AA875198	1384466_at	Notch1-induced protein	Rn.119606	493574	LOC493574
7.17667	7.70282	7.35742	7.27923	7.56339	7.58355	7.31695	7.54544	7.34332	144.675	208.343	163.985	155.334	189.15	191.812	159.449	186.812	162.39	0.162038	0.026033	0.100818	0.060473	0.077698	0.041598	0.136998	0.080204	0.105479	AI178019	1374326_at	Peter pan homolog (Drosophila)	Rn.144881	298699	Ppan
8.68655	8.90244	8.91134	8.81993	9.07702	9.05236	8.64932	9.007	8.95264	412.014	478.522	481.483	451.922	540.077	530.923	401.518	514.49	495.465	0.089725	0.109245	0.069968	0.063942	0.057561	0.066953	0.059595	0.090635	0.060455	NM_057195	1367935_at	Smu-1 suppressor of mec-8 and unc-52 homolog (C. elegans)	Rn.54978	117541	Smu1
9.01669	9.21303	9.26256	9.13264	9.37998	9.44777	8.97687	9.26972	9.27119	517.958	593.469	614.198	561.305	666.278	698.332	503.857	617.254	617.883	0.130652	0.041542	0.068633	0.064301	0.047119	0.047485	0.097186	0.040583	0.047373	AI236743	1373101_at	Phosphatidylinositol glycan, class K	Rn.17350	295543	Pigk
9.41609	9.79629	9.66414	9.52401	10.0283	9.7355	9.56045	9.78071	9.53302	683.165	889.154	811.327	736.229	1044.29	852.467	755.061	879.604	740.841	0.140474	0.084902	0.144901	0.084337	0.052215	0.118332	0.064472	0.133757	0.052185	BM391506	1375211_at	Ribonuclease T2	Rn.18019	292306	Rnaset2
3.78265	3.71144	4.30337	4.08308	3.84048	4.37476	3.75326	3.95786	4.43357	13.7623	13.0995	19.7444	16.9484	14.3252	20.746	13.4848	15.5394	21.6091	0.077867	0.095102	0.168333	0.148068	0.189236	0.249417	0.112793	0.056391	0.223132	BF411794	1380332_at	Transcribed locus	Rn.206862	-	-
11.5607	11.9822	11.8922	11.5289	11.7987	11.7192	11.7457	11.9432	11.9074	3020.77	4045.77	3801.1	2954.91	3562.56	3371.56	3434.06	3937.87	3841.36	0.198652	0.032462	0.051892	0.024207	0.039892	0.016544	0.037974	0.018951	0.024684	AI171547	1388925_at	Sirtuin (silent mating type information regulation 2 homolog) 5 (S. cerevisiae)	Rn.137920	306840	Sirt5
11.077	11.4068	11.2846	11.4711	11.7895	11.793	11.2121	11.377	11.4498	2160.28	2715.12	2494.61	2838.87	3539.92	3548.52	2372.35	2659.61	2797.26	0.214385	0.042055	0.058242	0.038094	0.061826	0.043574	0.081096	0.064176	0.03283	AI579422	1388802_at	Brain expressed gene 1	Rn.9190	501625	Bex1
9.54155	9.95367	9.74505	9.91567	10.3693	9.91334	9.60041	9.97863	9.67985	745.234	991.638	858.129	965.86	1322.73	964.301	776.267	1008.94	820.21	0.117319	0.121283	0.127169	0.100278	0.112776	0.094051	0.096815	0.092326	0.113734	BF522334	1379542_at	Small nuclear ribonucleoprotein polypeptide F	Rn.14918	680737	Snrpf
9.47955	9.9698	9.96036	9.89104	9.88348	9.97044	9.64738	9.81066	9.94695	713.886	1002.79	996.247	949.51	944.548	1003.23	801.956	898.055	987.03	0.129159	0.090607	0.084463	0.081783	0.120359	0.071615	0.091298	0.079354	0.061364	AI576297	1383327_at	Transcribed locus	Rn.122017	-	-
9.49554	9.63198	9.54739	9.45249	9.83809	9.92241	9.36448	9.62421	9.6002	721.842	793.441	748.257	700.621	915.293	970.383	659.158	789.18	776.154	0.148332	0.044165	0.058702	0.119365	0.057401	0.060318	0.124178	0.049103	0.063505	BI274796	1376656_at	Ubiquitin specific peptidase 20	Rn.27074	311856	Usp20
10.0635	10.502	10.2732	10.1657	10.4212	10.3811	10.1321	10.3662	10.3416	1070.08	1450.16	1237.49	1148.63	1371.18	1333.59	1122.19	1319.89	1297.57	0.136233	0.041373	0.041629	0.044741	0.04683	0.045262	0.068983	0.05948	0.026131	AI408771	1373382_at	RER1 retention in endoplasmic reticulum 1 homolog (S. cerevisiae)	Rn.129142	298675	Rer1
9.49747	9.91305	9.67244	9.8059	10.1007	9.92309	9.46245	9.77652	9.70187	722.809	964.107	816.008	895.097	1098.03	970.84	705.474	877.053	832.825	0.096558	0.069963	0.02046	0.072518	0.05238	0.039356	0.092451	0.055785	0.046411	BM388758	1374011_at	Excision repair cross-complementing rodent repair deficiency, complementation group 3	Rn.44012	291703	Ercc3
8.34937	8.7393	8.44595	8.41309	8.84357	8.56463	8.32698	8.68221	8.43709	326.145	427.358	348.726	340.873	459.388	378.626	321.123	410.777	346.591	0.247617	0.088533	0.04895	0.090768	0.143169	0.072424	0.12096	0.053324	0.042005	U67140	1370507_at	Discs, large homolog-associated protein 4 (Drosophila)	Rn.11279	286930	Dlgap4
8.95219	9.18476	9.24385	8.70545	8.87014	9.09889	8.92458	9.03961	9.28021	495.311	581.953	606.284	417.447	467.927	548.326	485.922	526.252	621.758	0.112064	0.073736	0.091798	0.115578	0.096142	0.124189	0.097583	0.081345	0.087962	BE105589	1389776_at	Transcribed locus	Rn.23584	-	-
3.8351	3.89545	4.20826	3.84517	3.88134	4.26838	3.7652	3.97644	4.18013	14.2718	14.8815	18.4847	14.3718	14.7367	19.2713	13.5968	15.7408	18.1278	0.131499	0.117262	0.181685	0.09581	0.1091	0.212086	0.036911	0.095799	0.147472	AA848674	1372102_at	Nuclear receptor co-repressor 1	Rn.24948	54299	Ncor1
6.50948	6.95077	6.92442	6.83311	6.91864	7.13936	6.75276	6.86586	6.9186	91.1064	123.706	121.467	114.017	120.981	140.981	107.841	116.635	120.978	0.179763	0.082173	0.081111	0.049657	0.06343	0.072084	0.062811	0.038601	0.028076	BG374845	1396227_at	Mitochondrial ribosome recycling factor	Rn.105234	311903	Mrrf
6.34932	6.6182	6.70673	6.77494	6.85682	7.2196	6.29193	6.26483	6.67383	81.5334	98.2374	104.454	109.512	115.907	149.045	78.3537	76.8956	102.099	0.192183	0.134868	0.080024	0.118924	0.103931	0.108443	0.120837	0.141358	0.052481	AW526232	1380961_at	Transcribed locus	Rn.169523	-	-
3.30579	3.61331	3.48919	3.22782	3.46181	3.54683	3.16833	3.40923	3.44299	9.88876	12.2381	11.2293	9.36851	11.0181	11.687	8.99006	10.6238	10.8754	0.066425	0.064425	0.074168	0.075181	0.078702	0.068511	0.060979	0.093318	0.085222	AF118889	1387415_a_at	Syntaxin binding protein 5 (tomosyn)	Rn.96029	81022	Stxbp5
9.145	9.25241	9.40556	9.08602	9.30023	9.42526	8.97097	9.26053	9.31058	566.134	609.892	678.197	543.456	630.446	687.521	501.8	613.334	634.986	0.064784	0.121232	0.074567	0.039265	0.04815	0.097645	0.070681	0.111612	0.091952	AI228249	1374879_x_at	La ribonucleoprotein domain family, member 5	Rn.11463	307070	Larp5
9.83529	10.1736	10.3276	10.2114	10.3021	10.4697	9.99751	9.92335	10.3827	913.518	1154.94	1285.04	1185.6	1262.53	1418.06	1022.23	971.015	1335.07	0.247018	0.048637	0.064946	0.042348	0.059302	0.066732	0.057271	0.093713	0.087024	NM_031119	1387262_at	Sjogren syndrome antigen B	Rn.24494	81783	Ssb
9.26723	9.37319	9.59244	9.51806	9.65212	9.8448	9.25302	9.37225	9.75816	616.189	663.149	771.991	733.198	804.596	919.56	610.15	662.717	865.962	0.212388	0.081265	0.088976	0.058317	0.086435	0.115619	0.06211	0.083093	0.060769	BE098359	1372108_at	Pentatricopeptide repeat domain 3	Rn.3598	500199	Ptcd3
10.4729	10.5104	10.8137	10.8373	10.8996	11.2287	10.4565	10.5432	11.0147	1421.21	1458.63	1799.9	1829.58	1910.32	2399.8	1405.14	1492.17	2068.97	0.179757	0.045481	0.069908	0.080464	0.036432	0.091863	0.076949	0.054194	0.039676	AI411914	1389329_at	Lectin, galactoside-binding, soluble, 8	Rn.10069	116641	Lgals8
9.50842	9.62142	9.76149	9.54848	9.7265	10.0372	9.47225	9.66825	9.76874	728.316	787.655	867.963	748.823	847.165	1050.75	710.283	813.642	872.336	0.087707	0.028233	0.132503	0.083167	0.038264	0.123386	0.104751	0.056245	0.064875	BI274279	1376260_at	Similar to KIAA1627 protein	Rn.40840	295428	RGD1304822
8.03347	8.42736	8.57723	8.65287	8.60943	8.78444	8.20623	8.30092	8.55653	262.009	344.261	381.947	402.507	390.568	440.94	295.339	315.374	376.506	0.135692	0.071562	0.116343	0.13007	0.095823	0.051028	0.12121	0.081848	0.077511	NM_031714	1368060_at	Heat-responsive protein 12	Rn.6987	65151	Hrsp12
7.53364	7.70525	7.57407	7.12621	7.51363	7.31662	7.22786	7.60216	7.58113	185.29	208.695	190.556	139.702	182.738	159.412	149.9	194.302	191.491	0.099531	0.073619	0.073217	0.074174	0.065947	0.157573	0.116621	0.025216	0.082464	BI295562	1393118_at	Armadillo repeat containing 1	Rn.17507	294948	Armc1
9.07914	9.13471	9.27586	8.86492	9.04052	9.26021	8.75674	8.93365	9.25953	540.871	562.111	619.886	466.237	526.584	613.198	432.555	488.986	612.909	0.097392	0.041221	0.140757	0.028607	0.075888	0.076629	0.044665	0.101535	0.071204	BI285675	1390974_a_at	Transcribed locus	Rn.199357	-	-
8.36923	8.75197	8.65012	8.73361	9.00818	8.96819	8.5661	8.85553	8.63098	330.666	431.127	401.74	425.675	514.911	500.834	379.012	463.212	396.446	0.137709	0.031623	0.075798	0.054301	0.059154	0.059473	0.108151	0.040149	0.086123	BF281368	1388576_at	Eukaryotic translation initiation factor 3, subunit 9 (eta)	Rn.2829	288516	Eif3s9
7.83811	7.92132	8.09378	8.1109	8.29501	8.43199	7.70211	7.96878	8.11293	228.826	242.412	273.194	276.455	314.085	345.368	208.241	250.52	276.844	0.107532	0.081554	0.087874	0.091397	0.08402	0.096714	0.085715	0.11928	0.037492	BI303908	1377021_at	TRNA methyltransferase 6 homolog (S. cerevisiae)	Rn.8742	311441	Trmt6
7.51245	7.93607	7.64148	7.64457	7.85385	7.73172	7.46948	7.82504	7.77547	182.588	244.904	199.671	200.099	231.337	212.559	177.23	226.763	219.104	0.086015	0.059058	0.058211	0.069488	0.042235	0.0953	0.14194	0.173513	0.093831	BE102294	1383678_at	Organic solute carrier protein 1	Rn.206846	362595	Oscp1
6.75377	6.89274	6.94661	6.65852	6.85829	7.1127	6.72304	6.95025	7.02725	107.916	118.829	123.35	101.022	116.025	138.4	105.642	123.661	130.441	0.135219	0.080937	0.076018	0.091636	0.09877	0.062778	0.144668	0.074408	0.065221	AI175259	1391210_at	Transcribed locus	Rn.28872	-	-
11.4821	11.6906	11.6819	11.3382	11.6281	11.5988	11.379	11.6962	11.6376	2860.6	3305.38	3285.51	2589.04	3165.24	3101.61	2663.3	3318.23	3186.15	0.117551	0.067741	0.053189	0.0688	0.105781	0.038326	0.042482	0.069282	0.043154	AW523888	1382329_at	ESTs	-	-	-
7.83317	8.11189	8.26969	8.5849	8.69855	8.78569	7.94155	8.15244	8.21574	228.044	276.645	308.62	383.983	415.455	441.323	245.836	284.531	297.293	0.079597	0.061123	0.114492	0.082301	0.083607	0.086629	0.086297	0.098435	0.07181	BG375383	1377014_at	Similar to hypothetical protein MGC42105	Rn.19745	310376	RGD1308116
7.50531	7.66738	7.66624	7.68722	8.03649	8.03	7.42792	7.62575	7.73253	181.687	203.288	203.127	206.103	262.558	261.379	172.197	197.506	212.678	0.064514	0.0228	0.044337	0.070044	0.056466	0.08668	0.066909	0.064263	0.125374	BM392138	1372014_at	Mediator complex subunit 27	Rn.105472	296612	Med27
4.9743	5.17078	5.21736	4.65148	4.98387	5.15417	4.96128	4.967	5.16499	31.435	36.0213	37.2033	25.1325	31.6442	35.609	31.1526	31.2763	35.8771	0.079544	0.054209	0.043891	0.140276	0.092245	0.088171	0.088339	0.104564	0.071629	AI411098	1380412_at	ElaC homolog 1 (E. coli)	Rn.37959	307604	Elac1
9.62032	9.97916	10.1558	8.78724	8.76441	9.04021	9.7977	9.89678	10.0387	787.055	1009.31	1140.78	441.797	434.861	526.471	890.024	953.296	1051.84	0.113799	0.08162	0.052089	0.063948	0.159794	0.148087	0.089392	0.115761	0.04578	BI290283	1389505_at	Transcribed locus	Rn.19019	-	-
8.02505	8.38835	8.23263	8.12408	8.57714	8.30641	8.12606	8.38179	8.15536	260.484	335.077	300.794	278.992	381.924	316.576	279.375	333.557	285.107	0.191871	0.039122	0.064323	0.031711	0.065403	0.055569	0.060434	0.062529	0.083457	BI278125	1390697_at	Gem (nuclear organelle) associated protein 8	Rn.18700	363462	Gemin8
11.7731	12.0998	12.1084	11.7345	11.9041	11.9913	11.9028	12.0538	12.182	3499.9	4389.38	4415.62	3407.5	3832.58	4071.37	3829.13	4251.63	4646.73	0.180343	0.026518	0.049337	0.054951	0.03586	0.055617	0.059277	0.034626	0.033417	BE109614	1372713_at	SET domain containing 3	Rn.7951	299295	Setd3
4.68676	4.83267	5.09547	4.58659	4.819	5.00975	4.64204	4.54062	4.99251	25.7546	28.4957	34.1892	24.0271	28.2269	32.217	24.9685	23.2736	31.8343	0.083594	0.144806	0.125043	0.074677	0.103831	0.140876	0.145212	0.128637	0.098093	BF401654	1379638_at	Transcribed locus	Rn.57215	-	-
5.89095	6.4592	5.93986	5.71858	6.07509	5.87348	6.05486	6.37085	6.05522	59.3407	87.9859	61.3869	52.658	67.4193	58.6265	66.4805	82.7593	66.4971	0.237402	0.113996	0.050759	0.089259	0.072431	0.129815	0.157033	0.056271	0.082798	BI275803	1374732_at	Hexamthylene bis-acetamide inducible 2	Rn.8406	303580	Hexim2
6.29352	6.52072	6.51206	6.33274	6.63615	6.45527	6.2894	6.64019	6.57408	78.4401	91.8189	91.2694	80.6018	99.4673	87.7465	78.2164	99.7462	95.2786	0.063923	0.059011	0.069559	0.071873	0.033594	0.077269	0.099318	0.060151	0.053728	BM385592	1378322_at	ATG4 autophagy related 4 homolog D (S. cerevisiae)	Rn.202643	686505	Atg4d
7.46391	7.53129	7.34099	7.18627	7.67752	7.57471	7.23038	7.62947	7.43255	176.547	184.988	162.128	145.641	204.722	190.64	150.162	198.016	172.751	0.083366	0.057705	0.084998	0.054295	0.057311	0.090871	0.101061	0.10099	0.055912	BM392372	1392464_at	RAE1 RNA export 1 homolog (S. pombe)	Rn.14600	362281	Rae1
8.3919	8.8852	8.56895	8.38033	8.74231	8.62101	8.52463	8.70382	8.53852	335.903	472.837	379.762	333.22	428.25	393.716	368.273	416.976	371.835	0.150841	0.063196	0.11548	0.071274	0.08935	0.079013	0.053717	0.032785	0.140465	AI603449	1391338_at	Transcribed locus	Rn.168349	-	-
5.05184	5.27075	5.09468	5.01947	5.71891	5.21868	5.02602	5.27753	5.01036	33.1708	38.6059	34.1705	32.4348	52.67	37.2374	32.5824	38.7878	32.2306	0.096677	0.168398	0.111221	0.088188	0.104226	0.104006	0.105222	0.167654	0.117759	AW526982	1392280_at	Toll-like receptor 2	Rn.46387	310553	Tlr2
7.15472	7.19956	7.478	7.23987	7.39577	7.48883	7.13353	7.37107	7.59913	142.49	146.989	178.28	151.153	168.403	179.623	140.413	165.544	193.895	0.097818	0.11992	0.07965	0.083278	0.067133	0.088897	0.084775	0.062641	0.071279	AI179472	1376700_at	Transcribed locus	Rn.43951	-	-
9.52511	9.84912	9.69342	9.03495	9.41047	9.24374	9.47858	9.67603	9.70287	736.79	922.318	827.962	524.555	680.509	606.238	713.406	818.041	833.403	0.109856	0.090962	0.064643	0.086621	0.056904	0.064237	0.11003	0.152829	0.071563	AA892493	1388803_at	Deoxyhypusine synthase	Rn.105891	288923	Dhps
11.3727	11.3656	11.6998	11.5485	11.7271	11.9731	11.2757	11.3872	11.6972	2651.7	2638.68	3326.52	2995.33	3390.07	4020.33	2479.27	2678.48	3320.54	0.139592	0.073436	0.093074	0.11398	0.053982	0.090151	0.090471	0.068936	0.059993	AI230884	1374846_at	Hexamethylene bis-acetamide inducible 1	Rn.113703	498008	Hexim1
12.4986	12.9993	12.8556	12.8612	13.1358	12.9246	12.8212	13.0435	12.8558	5787	8188.03	7411.76	7440.58	9000.57	7774.85	7237.12	8442.77	7412.79	0.199815	0.055861	0.028737	0.050109	0.033667	0.050039	0.047581	0.039608	0.056859	NM_053971	1367567_at	Ribosomal protein L6	Rn.2660	117042	Rpl6
3.88509	4.5743	4.24895	4.50445	4.75466	4.369	4.08484	4.26276	4.09971	14.775	23.8233	19.0135	22.6973	26.9957	20.6633	16.9691	19.1963	17.1449	0.13168	0.12152	0.152882	0.094543	0.096404	0.184598	0.105246	0.06321	0.084057	BM384145	1384968_at	SH3-domain binding protein 2	Rn.212791	305450	Sh3bp2
8.27762	8.52519	8.68037	8.48599	8.68934	8.7958	8.41329	8.4752	8.66908	310.322	368.416	410.253	358.54	412.812	444.426	340.92	355.868	407.055	0.127116	0.084669	0.112639	0.067411	0.061448	0.118381	0.093755	0.110408	0.087515	BE112621	1377749_at	Transcribed locus	Rn.160479	-	-
6.70208	7.10103	6.76238	6.88973	7.42664	7.05453	6.87643	7.15845	6.85675	104.118	137.285	108.562	118.581	172.045	132.931	117.493	142.859	115.901	0.118518	0.067168	0.072141	0.206996	0.051306	0.091193	0.178135	0.087407	0.053894	NM_053340	1386986_at	Opioid growth factor receptor	Rn.15740	83525	Ogfr
6.01238	6.30059	6.33231	6.59447	6.91866	6.83886	6.08734	6.15807	6.32327	64.5516	78.8255	80.5778	96.6347	120.983	114.473	67.9942	71.4108	80.0744	0.053722	0.106736	0.070455	0.087868	0.069486	0.130569	0.067217	0.125705	0.043594	NM_031042	1368233_at	General transcription factor IIF, polypeptide 2	Rn.11000	81674	Gtf2f2
9.93867	10.1465	9.85297	9.51614	10.0429	9.77447	9.75799	10.151	9.87406	981.381	1133.45	924.782	732.223	1054.91	875.808	865.86	1136.99	938.401	0.234468	0.058866	0.068829	0.047103	0.045263	0.064188	0.102085	0.03655	0.058998	BI279090	1367471_at	Polymerase (RNA) II (DNA directed) polypeptide E, 25kDa	Rn.65038	690966	Polr2e
9.15088	9.43579	9.32178	8.92134	9.42483	9.00355	9.13041	9.42702	9.24219	568.446	692.557	639.934	484.832	687.316	513.261	560.438	688.36	605.587	0.13382	0.108023	0.067115	0.065763	0.056879	0.111783	0.093937	0.076338	0.039517	NM_017311	1367599_at	ATP synthase, H+ transporting, mitochondrial F0 complex, subunit C1 (subunit 9)	Rn.3357	29754	Atp5g1
10.9004	11.1427	11.369	11.0701	11.1138	11.3649	11.1339	11.26	11.4127	1911.38	2260.93	2644.9	2149.97	2216.09	2637.4	2247.18	2452.44	2726.25	0.204829	0.034574	0.084419	0.074347	0.0627	0.103628	0.063413	0.052885	0.046453	AI171781	1399116_at	LUC7-like 2 (S. cerevisiae)	Rn.18604	312251	Luc7l2
9.45299	9.7678	9.64934	10.1824	10.5328	10.521	9.59536	9.80583	9.65312	700.864	871.768	803.047	1162	1481.46	1469.39	773.555	895.053	805.153	0.173662	0.025229	0.049153	0.069855	0.100557	0.03024	0.083601	0.041463	0.032782	AI412410	1368846_at	CaM kinase-like vesicle-associated	Rn.9958	79011	Camkv
8.27506	8.37513	8.40723	8.31604	8.67038	8.61974	8.09209	8.37813	8.38747	309.771	332.021	339.491	318.697	407.422	393.369	272.874	332.712	334.873	0.100796	0.069161	0.065949	0.052802	0.063481	0.062055	0.062052	0.038863	0.064007	BM390554	1383420_at	Lactation elevated 1	Rn.24314	502479	Lace1
7.71498	8.18545	8.03155	8.05329	8.28846	8.1412	7.93515	8.20477	8.00424	210.107	291.116	261.66	265.633	312.662	282.322	244.747	295.041	256.753	0.123296	0.037804	0.086168	0.084212	0.088573	0.078662	0.071319	0.068047	0.052543	AI411279	1371567_at	Aldehyde dehydrogenase 7 family, member A1	Rn.7330	291450	Aldh7a1
7.63295	8.15592	7.85641	7.87061	8.09262	7.97918	7.80272	8.09222	7.878	198.494	285.218	231.748	234.04	272.974	252.332	223.282	272.898	235.242	0.067197	0.073515	0.07603	0.044429	0.063938	0.062602	0.086107	0.084216	0.062049	AI556888	1379775_at	BRF1 homolog, subunit of RNA polymerase III transcription initiation factor IIIB (S. cerevisiae)	Rn.205393	299347	Brf1
8.93569	9.26969	9.26186	9.11744	9.29303	9.33757	8.99556	9.21783	9.19643	489.678	617.241	613.9	555.422	627.308	646.977	510.427	595.447	586.68	0.06575	0.068598	0.056192	0.057299	0.056833	0.042692	0.038562	0.064083	0.069494	AI501182	1383011_at	Eukaryotic translation initiation factor 2A	Rn.198593	502531	Eif2a
7.96154	8.15766	8.15957	7.72986	8.10398	8.02401	8.01251	8.29341	8.14247	249.266	285.562	285.94	212.285	275.132	260.296	258.229	313.737	282.571	0.103503	0.117499	0.07665	0.049359	0.100569	0.072854	0.093094	0.081928	0.104198	AA964898	1382143_at	FERM, RhoGEF (Arhgef) and pleckstrin domain protein 1 (chondrocyte-derived)	Rn.92109	306183	Farp1
8.16774	8.28057	8.52674	8.24625	8.45604	8.6182	8.1427	8.15344	8.5223	287.564	310.957	368.812	303.647	351.173	392.949	282.616	284.728	367.678	0.103322	0.058349	0.111623	0.101831	0.085469	0.138672	0.080679	0.14332	0.113609	NM_080781	1367461_at	Coatomer protein complex, subunit beta 1	Rn.4327	114023	Copb1
2.52917	2.45704	2.76286	2.36602	2.55819	2.82239	2.44246	2.55752	2.92499	5.77239	5.49089	6.7874	5.15517	5.88968	7.07333	5.43568	5.88695	7.59468	0.101363	0.025101	0.123265	0.027089	0.12716	0.258619	0.065574	0.056435	0.165854	AI136344	1398633_at	Transcribed locus, strongly similar to NP_001074759.1 BAT2 domain containing 1 [Mus musculus]	Rn.23673	-	-
6.81405	7.06701	7.03977	6.99348	7.19275	7.21406	6.76148	6.97195	7.1289	112.521	134.086	131.578	127.423	146.296	148.473	108.495	125.535	139.963	0.11945	0.100838	0.081443	0.059599	0.092543	0.123227	0.09504	0.041045	0.065462	BF388256	1381316_at	Transcribed locus	Rn.204762	-	-
10.5013	10.8754	10.5831	10.3883	10.9146	10.5317	10.4794	10.7156	10.5377	1449.46	1878.55	1534.02	1340.26	1930.29	1480.33	1427.62	1681.58	1486.5	0.137066	0.052681	0.04804	0.064382	0.085666	0.106294	0.106887	0.131148	0.018837	AA892845	1372706_at	Hexosaminidase B	Rn.203067	294673	Hexb
3.23221	3.04232	3.61425	3.11441	3.32817	3.46344	3.14013	3.29991	3.61244	9.39706	8.23815	12.2461	8.66026	10.0434	11.0306	8.81604	9.84854	12.2307	0.060598	0.039618	0.197106	0.050897	0.129101	0.125484	0.128963	0.179383	0.157198	BE103244	1379724_at	Pleckstrin homology-like domain, family B, member 2	Rn.201706	685611	Phldb2
9.43148	9.68929	9.65222	9.43766	9.74637	9.65867	9.41114	9.66697	9.62339	690.492	825.595	804.651	693.456	858.914	808.257	680.825	812.92	788.731	0.05613	0.075044	0.048626	0.031528	0.061572	0.071866	0.042791	0.072741	0.070428	BF522734	1394397_at	Ribosomal L1 domain containing 1	Rn.154542	302898	Rsl1d1
6.63749	7.0208	6.65769	6.05335	6.59421	6.24218	6.69046	6.93685	6.71381	99.5597	129.859	100.963	66.411	96.6173	75.6978	103.283	122.518	104.968	0.166997	0.048712	0.130815	0.136838	0.097832	0.163506	0.098665	0.053259	0.124716	AI180194	1374457_at	Serine palmitoyltransferase, long chain base subunit 2	Rn.162888	366697	Sptlc2
8.13564	8.24828	8.58193	7.77193	7.75434	8.08596	8.06467	8.07876	8.57934	281.236	304.074	383.194	218.567	215.918	271.717	267.736	270.364	382.506	0.049276	0.045453	0.054265	0.141122	0.061123	0.087072	0.085196	0.098739	0.049036	BF399429	1389026_at	Ankyrin repeat domain 42	Rn.51262	293117	Ankrd42
6.6776	6.90526	6.87367	6.81426	7.05819	7.11846	6.64782	6.92705	6.86515	102.367	119.864	117.268	112.537	133.268	138.954	100.275	121.689	116.578	0.064005	0.026751	0.054364	0.071558	0.041461	0.034811	0.092582	0.06005	0.035858	BE104538	1379407_at	IMP4, U3 small nucleolar ribonucleoprotein, homolog (yeast)	Rn.6698	316317	Imp4
7.82254	8.15173	7.95129	7.92918	8.26988	8.12178	7.82326	8.10379	8.00808	226.37	284.391	247.501	243.737	308.661	278.548	226.483	275.096	257.438	0.075156	0.054261	0.066065	0.068812	0.0584	0.071288	0.072075	0.047155	0.046978	BI304064	1373815_at	Lectin, mannose-binding 2	Rn.47037	290994	Lman2
8.02167	8.15718	8.11619	7.84916	8.23813	8.16168	7.82502	8.05042	8.11547	259.874	285.467	277.47	230.586	301.942	286.359	226.76	265.105	277.332	0.079465	0.044632	0.051596	0.067011	0.077034	0.061523	0.0645	0.042	0.049425	NM_022509	1367883_at	Survival motor neuron 1	Rn.1119	64301	Smn1
9.12771	9.36883	9.34004	9.15254	9.28598	9.46021	9.07463	9.33291	9.38293	559.39	661.148	648.085	569.101	624.25	704.38	539.183	644.89	667.642	0.130664	0.033804	0.040042	0.078604	0.064657	0.035845	0.088692	0.068764	0.062342	AW917124	1373094_at	General transcription factor IIH, polypeptide 1	Rn.24733	361580	Gtf2h1
10.2423	10.5001	10.7095	10.3011	10.3794	10.5658	10.4247	10.5789	10.6399	1211.27	1448.26	1674.48	1261.65	1332.02	1515.73	1374.51	1529.56	1595.62	0.149253	0.112936	0.043122	0.051499	0.114136	0.017692	0.066088	0.14572	0.025115	BF283269	1371965_at	Similar to RIKEN cDNA 2010311D03	Rn.3269	362134	RGD1303272
6.04897	6.10854	6.23274	5.98322	6.25973	6.43706	6.0853	6.22798	6.40228	66.2097	69.0007	75.2041	63.2599	76.6243	86.6459	67.8981	74.9564	84.5821	0.079203	0.093402	0.113773	0.061047	0.084009	0.088991	0.114098	0.105325	0.093347	NM_022244	1387035_a_at	Rho GTPase activating protein 17	Rn.64581	63994	Arhgap17
11.3109	11.7722	11.509	11.2821	11.5636	11.3843	11.4384	11.7235	11.544	2540.51	3497.72	2914.43	2490.29	3026.85	2673.1	2775.25	3381.62	2986	0.215397	0.028441	0.057022	0.069821	0.08208	0.077321	0.078417	0.039443	0.024996	BI296033	1398919_at	Similar to Hypothetical protein CGI-99	Rn.1434	302247	RGD1304704
8.65903	9.22534	8.82225	8.08392	8.58472	8.07551	8.96236	9.29412	8.70763	404.229	598.555	452.649	271.333	383.935	269.756	498.815	627.782	418.078	0.159179	0.090584	0.213548	0.14272	0.067511	0.243517	0.082687	0.081397	0.225625	AI578120	1384264_at	Myosin, heavy chain 14	Rn.143782	308572	Myh14
8.13098	8.40767	8.23026	8.37374	8.63122	8.69299	8.00932	8.25837	8.26167	280.33	339.595	300.3	331.701	396.512	413.857	257.659	306.208	306.91	0.066784	0.06884	0.036811	0.086833	0.045067	0.105585	0.124904	0.030453	0.100366	BF417345	1382117_at	SET domain containing 6	Rn.18307	291844	Setd6
5.73765	5.93282	5.97466	5.31306	5.63441	5.77298	5.77492	5.8443	5.91953	53.3586	61.0881	62.8857	39.7549	49.6737	54.6815	54.755	57.4526	60.528	0.091498	0.066037	0.065311	0.130026	0.077378	0.077428	0.090693	0.045502	0.066427	BM388963	1373930_at	Similar to pericentrin	Rn.199175	687681	LOC687681
8.5266	8.78924	8.63841	9.33416	9.82982	9.57968	8.5601	8.79627	8.62914	368.776	442.41	398.493	645.449	910.061	765.193	377.439	444.571	395.941	0.090096	0.046829	0.064219	0.078664	0.068856	0.076437	0.103679	0.09954	0.070948	AI412065	1373337_at	Glyoxylate reductase/hydroxypyruvate reductase	Rn.7815	680021	Grhpr
10.3185	10.7348	10.4517	10.3596	10.7603	10.4589	10.3857	10.7027	10.4332	1276.96	1704.11	1400.47	1313.86	1734.5	1407.48	1337.85	1666.61	1382.63	0.136798	0.097497	0.063202	0.020982	0.060183	0.057413	0.093383	0.072244	0.051202	BI303856	1388361_at	NADH dehydrogenase (ubiquinone) 1 beta subcomplex, 10	Rn.2867	681418	Ndufb10
10.674	11.0374	10.7356	10.4647	10.9164	10.5801	10.8235	11.2098	10.8411	1633.78	2101.79	1705.05	1413.15	1932.7	1530.83	1812.17	2368.57	1834.41	0.136712	0.113376	0.057388	0.088766	0.092491	0.104809	0.119871	0.113725	0.050792	BI275257	1375206_at	WSC domain containing 1	Rn.198297	287466	Wscd1
5.14391	5.52077	5.38606	5.1922	5.45255	5.37193	5.12176	5.35847	5.27269	35.3567	45.9111	41.8182	36.5601	43.7906	41.4107	34.818	41.0261	38.6579	0.136181	0.074593	0.078436	0.04603	0.052509	0.051536	0.104204	0.031966	0.032779	BI288042	1385306_at	Transcribed locus, strongly similar to NP_082503.2 BRCA1 associated protein [Mus musculus]	Rn.217095	-	-
10.3729	10.3337	10.6682	9.09901	8.94748	9.5131	10.1843	10.3873	10.7816	1326.03	1290.49	1627.23	548.372	493.696	730.682	1163.54	1339.33	1760.29	0.198167	0.103488	0.120914	0.176252	0.070454	0.18671	0.093311	0.106752	0.124181	BG372522	1393368_at	Oxysterol binding protein-like 5	Rn.140527	361686	Osbpl5
7.30909	7.69266	7.48708	7.18334	7.59205	7.38538	7.46284	7.70442	7.46377	158.583	206.881	179.405	145.345	192.946	167.194	176.416	208.575	176.53	0.179763	0.109169	0.076992	0.116632	0.093529	0.062377	0.066883	0.051216	0.136673	BM388794	1390200_at	FK506 binding protein 15	Rn.162820	362528	Fkbp15
9.4238	9.73201	9.62691	8.69087	9.10046	8.87216	9.5571	9.72779	9.7183	686.826	850.407	790.658	413.25	548.923	468.583	753.31	847.923	842.364	0.097073	0.058395	0.041059	0.039848	0.060938	0.082129	0.055145	0.075771	0.075552	BI282724	1370252_at	Arginine vasopressin-induced 1	Rn.13633	171386	Avpi1
4.56035	4.97438	4.65832	4.50193	4.91121	4.74581	4.5653	4.66397	4.71467	23.594	31.4367	25.2519	22.6577	30.09	26.8306	23.6751	25.351	26.2577	0.076696	0.183427	0.089656	0.053473	0.097407	0.111798	0.082999	0.047528	0.056815	AA943768	1384602_at	G protein-coupled receptor 107	Rn.168447	311857	Gpr107
12.3455	12.5029	12.6282	12.3062	12.5339	12.5712	12.3242	12.497	12.6601	5204.34	5804.27	6330.92	5064.49	5930.34	6085.67	5128.07	5780.59	6472.47	0.08745	0.036885	0.056197	0.053796	0.034938	0.0969	0.049118	0.024477	0.043084	BF403169	1383254_at	ESTs	-	-	-
8.43635	8.72649	8.87116	8.61659	8.71248	8.84131	8.57378	8.56973	8.93235	346.413	423.58	468.258	392.511	419.486	458.669	381.035	379.967	488.546	0.085435	0.118096	0.061214	0.057807	0.043076	0.055837	0.06466	0.148909	0.066713	BI282268	1372072_at	Haloacid dehalogenase-like hydrolase domain containing 2	Rn.7319	361351	Hdhd2
7.04049	7.44501	7.33606	7.05833	7.11348	7.27423	7.03043	7.16077	7.34672	131.643	174.249	161.575	133.281	138.475	154.797	130.729	143.089	162.773	0.092738	0.070297	0.073338	0.056427	0.068623	0.046508	0.131812	0.066719	0.089623	BF394102	1377180_at	Transcribed locus	Rn.52408	-	-
7.56864	7.81758	7.56626	7.29268	7.69019	7.55336	7.49728	7.80669	7.69875	189.84	225.593	189.527	156.789	206.527	187.84	180.678	223.897	207.757	0.118493	0.086867	0.090464	0.149294	0.079878	0.041741	0.102928	0.074099	0.067332	AI229668	1374107_at	ElaC homolog 2 (E. coli)	Rn.163124	282826	Elac2
9.64243	9.91699	10.0193	10.1328	10.2021	10.3862	9.75414	9.91996	10.038	799.21	966.744	1037.79	1122.73	1177.98	1338.31	863.552	968.736	1051.33	0.114213	0.080622	0.053647	0.068627	0.050792	0.065555	0.043251	0.050629	0.05847	BE107454	1398934_at	Mitogen-activated protein kinase kinase kinase 7 interacting protein 2	Rn.19523	308267	Map3k7ip2
8.7444	8.98437	9.0048	8.45028	8.73428	8.51034	8.56424	8.90182	8.81042	428.871	506.483	513.706	349.774	425.873	364.643	378.524	478.316	448.953	0.068253	0.09758	0.091376	0.059996	0.151	0.098069	0.087834	0.091179	0.077494	BM386653	1376087_at	Family with sequence similarity 134, member C	Rn.28889	360632	Fam134c
8.8845	9.02993	8.98098	7.48618	7.72616	7.87744	8.74007	9.05287	8.97642	472.608	522.733	505.294	179.294	211.741	235.15	427.586	531.111	503.7	0.060407	0.051832	0.082442	0.067118	0.118355	0.072087	0.10547	0.049941	0.108831	BE113377	1391007_s_at	Potassium inwardly rectifying channel, subfamily J, member 11	Rn.3985	83535	Kcnj11
8.25096	8.3852	8.39275	7.52504	7.83569	7.92391	8.21031	8.4148	8.44268	304.64	334.346	336.101	184.189	228.443	242.848	296.176	341.277	347.936	0.130974	0.036309	0.026157	0.119662	0.074771	0.065838	0.035718	0.035417	0.054909	AA945898	1390029_at	Transmembrane protein 110	Rn.203413	361110	Tmem110
10.7726	11.1588	10.8648	11.0714	11.4426	11.0454	10.7512	11.1778	10.8806	1749.35	2286.3	1864.79	2151.91	2783.34	2113.47	1723.59	2316.61	1885.33	0.12439	0.027431	0.075951	0.042528	0.050404	0.06876	0.052109	0.039396	0.054578	BM392200	1388328_at	Eukaryotic translation initiation factor 3, subunit I	Rn.162577	682390	Eif3i
8.55089	8.88047	9.00279	8.62043	8.68203	8.79997	8.73262	8.87594	8.9703	375.037	471.29	512.991	393.557	410.725	445.713	425.383	469.812	501.567	0.146566	0.064396	0.069455	0.080855	0.065373	0.095034	0.099352	0.09316	0.053391	BG381541	1373875_at	Similar to RIKEN cDNA 1190005P17	Rn.154521	299818	RGD1308261
10.6786	10.8177	10.8095	10.2305	10.5379	10.5083	10.5343	10.8317	10.8034	1639	1804.9	1794.67	1201.4	1486.7	1456.51	1483	1822.5	1787.09	0.060275	0.02652	0.059752	0.056507	0.024226	0.063367	0.074496	0.043971	0.060545	BM387780	1393388_at	Zinc finger, DHHC-type containing 3	Rn.8573	301081	Zdhhc3
8.55485	9.10204	8.69994	8.53028	8.93809	8.61507	8.81777	9.0556	8.73836	376.068	549.525	415.856	369.718	490.493	392.098	451.246	532.117	427.079	0.249388	0.063868	0.05428	0.092884	0.058485	0.056323	0.068346	0.100371	0.044944	BF411424	1375938_at	Coiled-coil domain containing 12	Rn.11535	363151	Ccdc12
7.72058	8.05056	7.63507	7.69635	8.20897	7.94814	7.5909	7.87661	7.65233	210.924	265.131	198.786	207.411	295.901	246.961	192.792	235.015	201.178	0.090335	0.044325	0.137171	0.14502	0.095375	0.121091	0.154586	0.117046	0.103438	BI277596	1376134_at	Translation initiation factor eIF-2B subunit alpha/beta/delta-like protein	Rn.16390	288912	RGD1307789
9.36415	9.65938	9.72841	9.51898	9.62809	9.71087	9.42731	9.66491	9.64316	659.007	808.655	848.288	733.666	791.305	838.037	688.499	811.76	799.614	0.196527	0.027598	0.038997	0.042943	0.029459	0.073435	0.050757	0.038364	0.036163	BI295567	1373743_at	RWD domain containing 2B	Rn.206833	304132	Rwdd2b
8.57822	8.63028	8.59888	8.23751	8.56044	8.68901	8.34589	8.50525	8.71144	382.21	396.254	387.722	301.813	377.528	412.717	325.359	363.359	419.184	0.05348	0.095652	0.084911	0.101209	0.028488	0.130026	0.072274	0.070723	0.086369	AW141824	1376034_at	Similar to mKIAA0738 protein	Rn.44698	362353	RGD1565474
7.63207	7.66648	7.99721	7.62299	7.84399	8.01587	7.70209	7.76021	8.01556	198.373	203.161	255.505	197.128	229.761	258.832	208.238	216.798	258.776	0.158589	0.107875	0.104126	0.099962	0.09205	0.123483	0.092466	0.071671	0.069719	BE112594	1394966_at	Phosphatidic acid phosphatase type 2	Rn.151385	310812	Pap2d
8.21517	8.49868	8.36927	8.24882	8.52803	8.52709	8.17963	8.43236	8.35038	297.175	361.708	330.675	304.188	369.141	368.901	289.944	345.456	326.373	0.079593	0.068437	0.104272	0.088336	0.106453	0.078408	0.083099	0.08049	0.078441	BG665934	1392943_at	Membrane bound O-acyltransferase domain containing 2	Rn.35322	313997	Mboat2
8.10656	8.36655	8.32199	8.34134	8.47001	8.54637	7.94042	8.20916	8.27644	275.624	330.052	320.014	324.335	354.59	373.864	245.643	295.94	310.068	0.060709	0.062291	0.068041	0.073289	0.064858	0.102534	0.087593	0.079308	0.052305	BF408617	1377439_at	Similar to hypothetical protein FLJ13231	Rn.207007	310137	RGD1310081
8.32546	8.76178	8.50883	7.99367	8.30187	8.13476	8.47411	8.7324	8.53878	320.784	434.069	364.261	254.879	315.582	281.065	355.6	425.319	371.902	0.136685	0.07135	0.08585	0.08492	0.098826	0.122612	0.096723	0.080331	0.077337	AI235502	1373705_at	Mitochondrial ribosomal protein L28	Rn.163110	497876	Mrpl28
11.1514	11.4742	11.3554	10.8094	11.1436	11.0462	11.2287	11.4356	11.333	2274.6	2844.97	2620.09	1794.54	2262.34	2114.65	2399.8	2769.87	2579.72	0.157102	0.035934	0.088835	0.046354	0.02566	0.040267	0.056655	0.027617	0.060848	AI237372	1388529_at	RNA terminal phosphate cyclase domain 1	Rn.25445	295395	Rtcd1
5.28184	5.46945	5.45327	5.11475	5.6702	5.27873	5.25574	5.51971	5.27619	38.9038	44.3066	43.8125	34.6492	50.9214	38.82	38.2063	45.8773	38.7518	0.061747	0.105322	0.131838	0.086137	0.063024	0.054941	0.156614	0.094356	0.074217	BF419366	1374146_at	MAD2 mitotic arrest deficient-like 2 (yeast)	Rn.27237	313702	Mad2l2
10.8345	10.9871	11.0792	10.9447	11.1676	11.253	10.7366	10.7801	11.156	1826.04	2029.77	2163.57	1970.98	2300.29	2440.57	1706.23	1758.46	2281.87	0.136563	0.062252	0.077251	0.071647	0.065339	0.095254	0.112687	0.136498	0.093469	NM_019356	1367713_at	Eukaryotic translation initiation factor 2, subunit 1 alpha	Rn.1488	54318	Eif2s1
[truncated: 2,301 more rows]
